# Supplementary material for: Tsc2 disruption in mesenchymal progenitors results in tumors with vascular anomalies overexpressing Lgals3
Source: eLife. 2017 Jul 11;6:e23202. doi: 10.7554/eLife.23202 (PMC5505700; doi:10.7554/eLife.23202)
Supplement: Figure 1—source data 1 — Dermal thickness in control vs. Tsc2cKOPrrx1-cre mice. DOI: http://dx.doi.org/10.7554/eLife.23202.004 [file elife-23202-fig1-data1.xlsx]

## Sheet: Sheet1
			dermal thickness (microns)
Sample	Genotype	Age	measurement #1	measurement #2	measurement #3	Average of #1-3
321A-fp (front paw)	C	3mo	209.8	195.7	283.6	229.7
323a-fp	C	3mo	153.5	200.2	241.1	198.267
332a fp	C	3mo	243.8	187.7	276.5	236
334a fp	C	3mo	218.3	167.6	181.2	189.033
	Control					213.25	Average
						23.0876	Stdev
337a	KO	3mo	288.7	307.2	264.5	286.8
335a	KO	3mo	282.3	317.7	315.1	305.033
330a fp	KO	3mo	360.9	360.5	299.5	340.3
327a fp	KO	3mo	291.3	328.6	300.3	306.733
	Tsc2cKO					309.717	Average
						22.2961	Stdev
				t test
				0.000955197
