# Supplementary material for: Tsc2 disruption in mesenchymal progenitors results in tumors with vascular anomalies overexpressing Lgals3
Source: eLife. 2017 Jul 11;6:e23202. doi: 10.7554/eLife.23202 (PMC5505700; doi:10.7554/eLife.23202)
Supplement: Figure 1—source data 2. — Survival data for Tsc2cKOPrrx1-cre mice. DOI: http://dx.doi.org/10.7554/eLife.23202.005 [file elife-23202-fig1-data2.xlsx]

## Sheet: Sheet1
Weeks	Group	Censored (0), Expired (1)
40.14	3	1
24.43	4	1
29	4	1
24	3	1		Group 1	M control
20.57	3	1		Group 2	F control
28.43	4	1		Group 3	M cKO
27.57	3	1		Group 4	F cKO
20.57	3	1
18.14	3	1
22.14	4	1
36.57	3	1
36.71	4	1
22	3	1
34	4	1
34	4	1
26.57	3	0
13.14	3	1
22.43	3	0
21.29	4	0
20.29	4	0
18.86	3	0
17.71	3	0
17.71	3	0
17.71	4	0
17.71	4	0
18.57	3	0
21.43	3	0
17.57	4	0
17.57	3	0
17.57	4	0
17.57	4	0
32.14	3	1
28.29	3	1
25	4	1
19	4	1
15	4	0
15	4	0
29.29	3	1
17.29	4	1
19.14	4	1
20	3	1
19.29	4	1
18.43	4	1
16.43	4	1
23.29	3	1
15.43	4	1
45	1	0
37.57	2	0
25.57	2	0
45.29	1	0
39.43	2	0
29	1	0
53.86	1	0
29	2	0
29	2	0
32.14	1	0
29.86	1	0
29.86	1	0
35.86	2	0
26.43	2	0
29.29	1	0
29.29	1	0
21.57	1	0
21.57	1	0
46.43	1	0
24.29	1	0
30	1	0
29.14	1	0
39	1	0
42.86	1	0
39	1	0
48	1	0
44.14	2	0
33.43	1	0
