# Supplementary material for: Tsc2 disruption in mesenchymal progenitors results in tumors with vascular anomalies overexpressing Lgals3
Source: eLife. 2017 Jul 11;6:e23202. doi: 10.7554/eLife.23202 (PMC5505700; doi:10.7554/eLife.23202)
Supplement: Figure 1—source data 3. — Serum chemistry and CBC analysis of Tsc2cKOPrrx1-cre mice. DOI: http://dx.doi.org/10.7554/eLife.23202.006 [file elife-23202-fig1-data3.xlsx]

## Sheet: Serum Chemistry
Mouse ID	Genotype	M/F	D.O.B		Age	KO or WT	Glu(mg/dL)	BUN(mg/dL)	Creat(mg/dL)	Tprot(g/dL)	Alb(g/dL)	Alt(U/L)	Ast(U/L)	LDH(U/L)	Tbili(mg/dL)	CA(mg/dL)	Phos(mg/dL)	ALP(U/L)	CK(U/L)
57	cKO-1	F	2016-05-31	2016-11-16	24.1429	KO	157	43	0.2	5.2	2.9	59	182	330	0.4	10.4	8.1	137	248
87	cKO-2	M	2016-06-21	2016-11-16	21.1429	KO	341	22	0.2	4.9	2.8	228	627	1089	0.5	10.3	8.4	90	712
58	cKO-3	F	2016-05-31	2016-11-16	24.1429	KO	269	24	0.3	5	2.8	126	355	5336	0.3	10.9	10.7	171	325
103	cKO-4	M	2016-07-05	2016-11-16	19.1429	KO	248	26	0.2	5.3	2.8	72	237	386	0.2	10.7	8.3	198	220
63	cKO-5	M	2016-05-31	2016-11-16	24.1429	KO	256	38	0.2	4.8	2.6	52	199	285	0.5	10.2	6.9	150	277
141	cKO-6	M	2016-07-27	2016-11-10	15.1429	KO	252	23	0.2	5.5	3	18	67	252	0.3	11.1	8.9	149	177
136	cKO-7	M	2016-07-27	2016-11-10	15.1429	KO	245	20	0.3	4.4	2.3	17	81	178	0.2	10.2	8.2	89	166
146	cKO-8	M	2016-07-29	2016-11-10	14.8571	KO	314	19	0.3	4.9	2.8	40	128	298	0.3	11.1	8.8	130	187
143	cKO-9	M	2016-07-29	2016-11-10	14.8571	KO	311	41	0.2	5.3	3	26	148	283	0.3	11.6	8	157	459
142	cKO-10	M	2016-07-29	2016-11-15	15.5714	KO	260	20	0.3	5.1	2.8	226	562	1031	0.3	11.1	9.3	156	660
172	cKO-11	F	2016-08-03	2016-11-15	14.8571	KO	253	20	0.2	4.9	2.8	20	142	308	0.4	10.8	8.9	93	124
180	cKO-12	M	2016-08-03	2016-11-16	15	KO	248	22	0.3	5.1	3.5	20	232	563	0.9	10.6	8.6	70	356
					cKO AVE	AVERAGE	262.833	26.5	0.241667	5.03333	2.84167	75.3333	246.667	861.583	0.383333	10.75	8.59167	132.5	325.917
						st dev	46.0372	8.82661	0.0514929	0.287096	0.277843	77.3967	180.173	1440.61	0.189896	0.433799	0.899958	38.958	192.304
61	Control-1	M	2016-05-31	2016-11-16	24.1429	WT	366	32	0.4	6.7	3.5	142	135	508	0.4	11.8	10.7	92	302
81	Control-2	F	2016-06-16	2016-11-10	21	WT	275	25	0.3	6.3	3.4	198	248	500	0.4	11.6	10.8	147	302
109	Control-3	M	2016-07-05	2016-11-10	18.2857	WT	251	25	0.3	6.3	3.2	45	101	321	0.4	11.9	10.5	79	504
171	Control-4	F	2016-08-03	2016-11-15	14.8571	WT	326	19	0.3	5.3	3.1	29	95	329	0.6	11.2	9.7	136	98
153	Control-5	M	2016-08-02	2016-11-17	15.2857	WT	323	42	0.3	5.4	3.3	14	154	553	0.9	10.4	8.1	165	208
122	Control-6	F	2016-07-11	2016-11-17	18.4286	WT	206	20	0.4	5.4	3.1	21	85	174	0.4	11.1	11.3	167	480
178	Control-7	M	2016-08-03	2016-11-17	15.1429	WT	328	26	0.2	6.3	2.9	26	153	337	0.4	10.7	12.2	121	389
179	Control-8	M	2016-08-03	2016-11-17	15.1429	WT	362	27	0.4	5.8	3.4	34	151	420	0.6	11	10.8	114	168
181	Control-9	M	2016-08-03	2016-11-17	15.1429	WT	142	43	0.2	4.9	2.6	17	183	249	0.6	9.8	7.5	5	132
					WT AVE	AVERAGE	286.556	28.7778	0.311111	5.82222	3.16667	58.4444	145	376.778	0.522222	11.0556	10.1778	114	287
						st dev	75.3228	8.65705	0.0781736	0.605759	0.282843	65.4315	50.4604	127.352	0.171594	0.682113	1.50895	50.7715	148.046
						t-test	0.382171	0.562165	0.0237945	0.000805026	0.0164002	0.603913	0.118344	0.329797	0.100449	0.224693	0.00719344	0.355694	0.619916

## Sheet: Cell Counts
Mouse ID	Genotype	M/F	D.O.B		Age	KO or WT	WBC (K/uL)	NE (K/uL)	%NE	Lym (K/uL)	%lym	MO (K/uL)	%MO	EO (K/uL)	%EO	BA (K/uL)	%BA	RBC (M/uL)	HB (g/dL0	HCT%	PLT (/uL)
57	cKO-1	F	2016-05-31	2016-11-16	24.1429	KO	5.66	1.01	17.8445	3.64	64.311	0.75	13.2509	0.19	3.35689	0.07	1.23675	7.67	10.1	34.7	368
87	cKO-2	M	2016-06-21	2016-11-16	21.1429	KO	16.06	1.15	7.16065	13.69	85.2428	0.44	2.73973	0.61	3.79826	0.18	1.1208	6.47	9.9	33.2	328
58	cKO-3	F	2016-05-31	2016-11-16	24.1429	KO	3.68	0.47	12.7717	2.39	64.9457	0.35	9.51087	0.42	11.413	0.05	1.3587	7.37	9.6	33.3	217
103	cKO-4	M	2016-07-05	2016-11-16	19.1429	KO	4.1	0.65	15.8537	2.59	63.1707	0.63	15.3659	0.15	3.65854	0.08	1.95122	5.77	8	27.1	461
63	cKO-5	M	2016-05-31	2016-11-16	24.1429	KO	3.56	0.34	9.55056	2.55	71.6292	0.41	11.5169	0.24	6.74157	0.02	0.561798	5.15	7.6	24.6	205
141	cKO-6	M	2016-07-27	2016-11-10	15.1429	KO	6.14	2.06	33.5505	3.58	58.3062	0.28	4.56026	0.2	3.25733	0.02	0.325733	8.69	13.2	45.2	428
136	cKO-7	M	2016-07-27	2016-11-10	15.1429	KO	6.54	1.98	30.2752	4.03	61.6208	0.38	5.8104	0.14	2.14067	0.01	0.152905	8.92	13.4	45.2	622
146	cKO-8	M	2016-07-29	2016-11-10	14.8571	KO	5.7	1.88	32.9825	3.32	58.2456	0.42	7.36842	0.07	1.22807	0.01	0.175439	8.52	12.6	44.5	556
143	cKO-9	M	2016-07-29	2016-11-10	14.8571	KO	0.98	0.22	22.449	0.54	55.102	0.14	14.2857	0.07	7.14286	0.01	1.02041	2.59	4.4	12	161
142	cKO-10	M	2016-07-29	2016-11-15	15.5714	KO	9.12	3.16	34.6491	5.04	55.2632	0.39	4.27632	0.37	4.05702	0.15	1.64474	7.84	11.1	40.1	474
172	cKO-11	F	2016-08-03	2016-11-15	14.8571	KO	6.66	2.04	30.6306	4.06	60.961	0.4	6.00601	0.14	2.1021	0.02	0.3003	7.57	11.5	40.2	204
180	cKO-12	M	2016-08-03	2016-11-16	15	KO	6.92	2.18	31.5029	4.19	60.5491	0.29	4.19075	0.21	3.03468	0.05	0.722543	7.95	12.5	43.3	404
					cKO	AVERAGE	6.26	1.42833	23.2684	4.135	63.2789	0.406667	8.24017	0.234167	4.32759	0.0558333	0.880944	7.0425	10.325	35.2833	369
						St dev	3.71816	0.917822	10.1962	3.2224	8.27233	0.157845	4.39364	0.158599	2.82617	0.0566422	0.600062	1.80943	2.66803	10.1134	149.345
61	Control-1	M	2016-05-31	2016-11-16	24.1429	WT	8.78	1.55	17.6538	6.13	69.8178	0.78	8.88383	0.27	3.07517	0.05	0.569476	9.3	15	48.2	846
81	Control-2	F	2016-06-16	2016-11-10	21	WT	7.64	1.58	20.6806	5.57	72.9058	0.22	2.87958	0.22	2.87958	0.05	0.65445	10.53	16.4	57	607
109	Control-3	M	2016-07-05	2016-11-10	18.2857	WT	9.02	2.8	31.0421	5.92	65.6319	0.25	2.77162	0.05	0.554324	0.01	0.110865	9.9	15.2	51	887
171	Control-4	F	2016-08-03	2016-11-15	14.8571	WT	6.62	1.64	24.7734	4.36	65.861	0.33	4.98489	0.26	3.92749	0.03	0.453172	9.14	14.4	51.2	124
153	Control-5	M	2016-08-02	2016-11-17	15.2857	WT	7.3	2.04	27.9452	4.92	67.3973	0.24	3.28767	0.08	1.09589	0.02	0.273973	9.73	15.1	51.6	351
122	Control-6	F	2016-07-11	2016-11-17	18.4286	WT	12.68	2.2	17.3502	9.62	75.8675	0.68	5.36278	0.16	1.26183	0.02	0.157729	9.61	14.9	51.3	482
178	Control-7	M	2016-08-03	2016-11-17	15.1429	WT	11.44	2.41	21.0664	8.48	74.1259	0.34	2.97203	0.17	1.48601	0.03	0.262238	8.46	13.3	45.8	54.1
179	Control-8	M	2016-08-03	2016-11-17	15.1429	WT	10.66	2.87	26.9231	7.08	66.4165	0.48	4.50281	0.19	1.78236	0.04	0.375235	9.85	14.6	52.6	671
181	Control-9	M	2016-08-03	2016-11-17	15.1429	WT	10.42	2.6	24.952	6.8	65.2591	0.44	4.22265	0.45	4.31862	0.12	1.15163	9.77	14.4	50.8	677
					WT	AVERAGE	9.39556	2.18778	23.5985	6.54222	69.2536	0.417778	4.42976	0.205556	2.26459	0.0411111	0.445419	9.58778	14.8111	51.0556	522.122
						St dev	2.04061	0.519345	4.71532	1.67628	4.08069	0.199046	1.92508	0.117592	1.33016	0.0325747	0.320244	0.57697	0.826808	3.04019	295.767
						t-test	0.0345793	0.0386981	0.92941	0.0560226	0.0618678	0.887899	0.0256413	0.654657	0.0578179	0.495147	0.0637278	0.00069038	0.000112472	0.000243789	0.135994
