# Supplementary material for: Tsc2 disruption in mesenchymal progenitors results in tumors with vascular anomalies overexpressing Lgals3
Source: eLife. 2017 Jul 11;6:e23202. doi: 10.7554/eLife.23202 (PMC5505700; doi:10.7554/eLife.23202)
Supplement: Figure 3—source data 1. — Measurement of Tsc2 gene copy number in splenic cells enriched for EYFP fluorescence. DOI: http://dx.doi.org/10.7554/eLife.23202.018 [file elife-23202-fig3-data1.xlsx]

## Sheet: Splenic cells 
Cell fraction	Fold Exon 3	Fold Exon 6	Tsc1
WT 1	1	1	1
WT 2	0.98	1.05	0.97
WT ave	0.99	1.025	0.985
norm	1	1	1
stdev	0.0141421	0.0353553	0.0212132
	Fold Exon 3	Fold Exon 6	Tsc1
YFP + cKO 1	0.15	1.06	0.83
YFP + cKO 2	0.14	1.17	0.99
YFP + cKO 3	0.12	1.11	1
YFP+ cKO ave	0.136667	1.11333	0.94
norm	0.138047	1.08618	0.954315
stdev	0.0124722	0.0449691	0.0778888
