# Supplementary material for: Tsc2 disruption in mesenchymal progenitors results in tumors with vascular anomalies overexpressing Lgals3
Source: eLife. 2017 Jul 11;6:e23202. doi: 10.7554/eLife.23202 (PMC5505700; doi:10.7554/eLife.23202)
Supplement: Figure 3—source data 2. — Dermal thickness in Tsc2cKO mice treated with sirolimus or vehicle. DOI: http://dx.doi.org/10.7554/eLife.23202.019 [file elife-23202-fig3-data2.xlsx]

## Sheet: Sheet1
						dermal thickness 1	dermal thickness 2	dermal thickness 3	avg
147						315.6	338.2	343.1	332.3
507						341.2	352.9	320.2	338.1
527						287.4	240.2	241.4	256.333
588						197.6	212.3	187.6	199.167
608						228.1	173.8	205	202.3
613						325.7	323.9	323	324.2
504						341.7	329.5	363	344.733
575						391.3	379.4	394	388.233
									298.171	vehicle
									70.1625
148						231.3	216.9	215.3	221.167
505						190.8	207.7	196.7	198.4
508						171.7	161.8	158.5	164
529						235.6	270.9	256.8	254.433
555						142.7	121.8	135	133.167
558						139.8	124.2	149.6	137.867
602						233.8	227.4	222.7	227.967
609						208.5	208.1	195.7	204.1
616						160.1	186.1	183.3	176.5
618						220	220	261.9	233.967
									195.157	sirolimus
									41.2407
									0.0037847
