# Supplementary material for: Tsc2 disruption in mesenchymal progenitors results in tumors with vascular anomalies overexpressing Lgals3
Source: eLife. 2017 Jul 11;6:e23202. doi: 10.7554/eLife.23202 (PMC5505700; doi:10.7554/eLife.23202)
Supplement: Figure 3—source data 3. — Paw thickness measurement in Tsc2cKO mice treated with sirolimus and vehicle. DOI: http://dx.doi.org/10.7554/eLife.23202.020 [file elife-23202-fig3-data3.xlsx]

## Sheet: Statistical analysis
Model Information
Data Set	WORK.PAW_WIDTH
Dependent Variable	PawWidth
Covariance Structure	Variance Components
Estimation Method	REML
Residual Variance Method	Profile
Fixed Effects SE Method	Model-Based
Degrees of Freedom Method	Containment
Covariance Parameter Estimates
Cov Parm	Estimate
MouseID	0.01528
Residual	0.09277
Fit Statistics
-2 Res Log Likelihood	81.0
AIC	85
AICC	85.1
BIC	86.8
Type 3 Tests of Fixed Effects
Effect	Num DF	Den DF	F Value	Pr > F
treat	1	78	12.53	0.0007
Day	5	78	1.83	0.1165
treat*Day	5	78	4.06	0.0025
Least Squares Means
Effect	treat	Day	Estimate	Standard Error	DF						sirolimus	vehicle
treat*Day	sirolimus	PawWidthD0	2.2675	0.1039	78					0	2.2675	2.2442
treat*Day	sirolimus	PawWidthD6	2.2048	0.1039	78					6	2.2048	2.3189
treat*Day	sirolimus	PawWidthD12	2.2303	0.1039	78					12	2.2303	2.3669
treat*Day	sirolimus	PawWidthD18	2.3098	0.1039	78					18	2.3098	2.5325
treat*Day	sirolimus	PawWidthD24	2.2675	0.1231	78					24	2.2675	2.7461
treat*Day	sirolimus	PawWidthD30	1.9646	0.1156	78					30	1.9646	2.7849
treat*Day	vehicle	PawWidthD0	2.2442	0.1096	78
treat*Day	vehicle	PawWidthD6	2.3189	0.1096	78
treat*Day	vehicle	PawWidthD12	2.3669	0.1096	78
treat*Day	vehicle	PawWidthD18	2.5325	0.1096	78
treat*Day	vehicle	PawWidthD24	2.7461	0.1096	78
treat*Day	vehicle	PawWidthD30	2.7849	0.1234	78
Differences of Least Squares Means
Effect	treat	Day	_treat	Estimate	Standard Error	DF	t Value	Pr > |t|	Bonferroni adjusted P value
treat*Day	sirolimus	PawWidthD0	vehicle	0.02333	0.151	78	0.15	0.8776	1
treat*Day	sirolimus	PawWidthD6	vehicle	-0.1141	0.151	78	-0.76	0.4521	1
treat*Day	sirolimus	PawWidthD12	vehicle	-0.1367	0.151	78	-0.91	0.3682	1
treat*Day	sirolimus	PawWidthD18	vehicle	-0.2228	0.151	78	-1.47	0.1443	0.8658
treat*Day	sirolimus	PawWidthD24	vehicle	-0.4787	0.1648	78	-2.9	0.0048	0.0288
treat*Day	sirolimus	PawWidthD30	vehicle	-0.8203	0.169	78	-4.85	<.0001	<.001

## Sheet: foot pad thickness
Mouse ID	M/F - treatment	Day 0	Day 6	Day 12	Day 18	Day 24	Day 30
147	F-vehicle	2.3	3.26	2.83	3.08	3.03	2.53
504	F-vehicle	2.25	2.15	2.22	2.35	2.93	2.79
588	F-vehicle	2.49	2.07	2.2	2.2	2.64
608	F-vehicle	2.2	2.3	2.58	2.45	2.23	2.53
148	F-rapamycin	2.27	2.79	2.34	2.23	1.93	2.05
505	F-rapamycin	2.16	1.8	2.12	2.06	2.2	2.28
609	F-rapamycin	2.13	2.21	2.46	2.47	2.1	2.09
555	F-rapamycin	2.74	2.24	2.43	2.78
558	F-rapamycin	2.2	2.21	2.51	2.4
507	M-vehicle	2.21	1.82	2.12	2.05	2.81	3.06
527	M-vehicle	2.11	2.28	2.47	2.47	2.81
575	M-vehicle	2.33	2.47	2.21	2.49	2.75	3.04
594	M-vehicle	2.09	2.22	2.26	2.87	2.57	2.92
613	M-vehicle	2.24	2.32	2.44	2.84	2.96	2.69
508	M-rapamycin	2.27	2.14	2.15	2.04	2.68	2.61
529	M-rapamycin	2.09	1.93	1.97	2.18	2.39	0
595	M-rapamycin	2.23	2.16	1.95	2.1	2.11	2.2
602	M-rapamycin	2.3	2.45	2.38	2.61	2.34	2.21
616	M-rapamycin	2.31	2.12	2.01	2.24		2.13
