# Supplementary material for: Tsc2 disruption in mesenchymal progenitors results in tumors with vascular anomalies overexpressing Lgals3
Source: eLife. 2017 Jul 11;6:e23202. doi: 10.7554/eLife.23202 (PMC5505700; doi:10.7554/eLife.23202)
Supplement: Figure 4—source data 1. — Gene expression changes in KO (Tsc2-/-) fibroblasts versus WT (wild-type) fibroblasts with FDR < 10%. DOI: http://dx.doi.org/10.7554/eLife.23202.023 [file elife-23202-fig4-data1.xls]

## Sheet: sheet1
Comparison of KO vs WT fibroblasts (fdr < 10%)
Red overexpressed in KO vs WT, Blue Overexpressed in WT vs KO
Gene ID	Score(d)	Numerator(r)	Denominator(s+s0)	Fold Change	Fold Change (KO/WT)	q-value(%)
St3gal5	-35.3921	-1.16895	0.0330286	0.444744	2.24848	0
Ccl8	-25.0145	-3.96403	0.158469	0.064078	15.606	0
Cml3	-20.2486	-0.511693	0.0252706	0.701399	1.42572	0
Ndufa4l2	-15.5043	-2.81734	0.181713	0.141871	7.04864	6.84543
Stt3a	-14.269	-0.268162	0.0187933	0.830377	1.20427	6.84543
Suds3	-14.1665	-0.379548	0.026792	0.768678	1.30093	6.84543
E130012A19Rik	-13.9881	-0.722879	0.0516783	0.605887	1.65047	6.84543
Stam2	-13.9805	-0.336134	0.0240431	0.792161	1.26237	6.84543
Fam183b	-13.7715	-0.16346	0.0118695	0.892881	1.11997	6.84543
Man2b1	-13.6123	-0.592658	0.0435383	0.66312	1.50802	6.84543
Pon3	-13.297	-0.875745	0.0658603	0.544973	1.83495	6.84543
Sdsl	-13.0789	-0.933113	0.0713449	0.523727	1.90939	6.84543
Sptlc2	-12.9647	-0.273396	0.0210877	0.82737	1.20865	6.84543
Mpp2	-12.9245	-0.710479	0.0549713	0.611117	1.63635	6.84543
F11r	-12.564	-1.09477	0.0871353	0.46821	2.13579	6.84543
Mgarp	-12.3676	-1.635	0.1322	0.32197	3.10588	6.95584
Prr32	-12.0152	-1.35386	0.112679	0.391245	2.55594	6.95584
Nans	-11.9851	-0.496247	0.0414055	0.708949	1.41054	6.95584
L3mbtl2	-11.5134	-0.404191	0.0351062	0.75566	1.32335	6.95584
Snrnp25	-11.2779	-0.374286	0.0331876	0.771487	1.2962	6.95584
Igfbp6	-11.1569	-0.615972	0.0552097	0.65249	1.53259	6.95584
St8sia2	-10.931	-1.00934	0.0923379	0.496772	2.013	6.95584
Uap1l1	-10.9265	-0.787157	0.0720409	0.579485	1.72567	6.95584
Myo19	-10.8771	-0.544454	0.0500549	0.685651	1.45847	6.95584
Rapsn	-10.701	-0.399041	0.0372901	0.758362	1.31863	6.95584
Psmb6	-10.6965	-0.350529	0.0327705	0.784296	1.27503	6.95584
Car5b	-10.6546	-0.693108	0.0650524	0.61852	1.61676	6.95584
Ccdc115	-10.6233	-0.353475	0.0332736	0.782697	1.27763	6.95584
Ikbkap	-10.5964	-0.421422	0.0397703	0.746688	1.33925	6.95584
Isoc2a	-10.5876	-0.516612	0.048794	0.699012	1.43059	6.95584
D17H6S53E	-10.512	-0.256659	0.0244157	0.837024	1.19471	6.95584
Gla	-10.2993	-1.08955	0.105789	0.469908	2.12807	6.95584
Ccnd1	-10.2804	-1.16168	0.113	0.446991	2.23718	6.95584
Adcyap1r1	-10.1611	-1.15426	0.113596	0.449295	2.22571	6.95584
Acsl1	-10.1206	-0.535386	0.0529008	0.689974	1.44933	6.95584
Rab20	-10.1009	-0.497934	0.0492961	0.70812	1.41219	6.95584
Dcun1d5	-9.93197	-0.419913	0.0422789	0.74747	1.33785	6.95584
Huwe1	-9.91312	-0.527133	0.0531753	0.693932	1.44106	6.95584
Sart1	-9.90294	-0.245137	0.024754	0.843736	1.18521	6.95584
Foxd1	-9.80115	-0.368001	0.0375467	0.774855	1.29056	6.95584
Grpel2	-9.68023	-0.24395	0.0252009	0.84443	1.18423	6.95584
Dnajb11	-9.67003	-0.591044	0.0611212	0.663863	1.50634	6.95584
Tcirg1	-9.57568	-0.551361	0.0575793	0.682376	1.46547	6.95584
Cmc2	-9.5617	-0.62201	0.0650522	0.649765	1.53902	6.95584
Rpn1	-9.55915	-0.687682	0.0719396	0.620851	1.61069	6.95584
Klhl15	-9.54776	-0.419293	0.0439153	0.747791	1.33727	6.95584
Stt3b	-9.43613	-0.269025	0.0285101	0.82988	1.20499	6.95584
6430548M08Rik	-9.39993	-0.672679	0.0715622	0.627341	1.59403	6.95584
Bcl2l13	-9.36356	-0.208275	0.0222431	0.865572	1.15531	6.95584
Pik3r3	-9.26969	-1.59611	0.172186	0.330767	3.02328	6.95584
Ostc	-9.23309	-0.346069	0.0374813	0.786725	1.27109	6.95584
Efcab1	-9.21478	-0.319481	0.0346705	0.801358	1.24788	6.95584
Lhpp	-9.21073	-0.539066	0.0585258	0.688216	1.45303	6.95584
BC003348	-9.12816	-1.13013	0.123807	0.456875	2.18878	6.95584
Slc31a1	-9.00766	-0.549735	0.0610297	0.683145	1.46382	6.95584
Renbp	-9.00741	-0.723359	0.0803071	0.605686	1.65102	6.95584
Vipr1	-8.9989	-0.375843	0.0417654	0.770655	1.2976	6.95584
Htatip2	-8.98003	-0.494973	0.0551193	0.709575	1.40929	6.95584
Ndufs8	-8.97497	-0.308568	0.034381	0.807443	1.23848	6.95584
Mlkl	-8.97243	-0.714601	0.0796442	0.609374	1.64103	6.95584
Ldhb	-8.9248	-0.550617	0.0616951	0.682728	1.46471	6.95584
AB343393	-8.88231	-4.48108	0.504494	0.0447777	22.3326	6.95584
Frmd8	-8.8774	-0.604082	0.0680472	0.65789	1.52001	6.95584
Fam105a	-8.86765	-0.470213	0.0530256	0.721858	1.38531	6.95584
Laptm4b	-8.74588	-0.784129	0.089657	0.580702	1.72205	6.95584
Edrf1	-8.72489	-0.244112	0.0279788	0.844335	1.18436	6.95584
Heatr3	-8.71059	-0.478608	0.0549455	0.71767	1.3934	6.95584
Nxt1	-8.69114	-0.421734	0.0485246	0.746527	1.33954	6.95584
Ero1l	-8.68346	-0.796275	0.0917002	0.575834	1.73661	6.95584
Unc119b	-8.67451	-0.17919	0.0206571	0.883199	1.13225	6.95584
Srxn1	-8.65951	-0.627513	0.0724652	0.647291	1.5449	6.95584
Grb14	-8.51993	-1.15201	0.135214	0.449997	2.22224	6.95584
Ddit4	-8.49026	-1.28131	0.150915	0.411423	2.43059	6.95584
Map4k4	-8.48225	-0.416979	0.049159	0.748991	1.33513	6.95584
Pradc1	-8.4791	-0.432684	0.0510294	0.740882	1.34974	6.95584
Ms4a4d	-8.46461	-0.633723	0.0748674	0.644511	1.55156	6.95584
Adgrg2	-8.45532	-0.706345	0.0835386	0.612871	1.63167	6.95584
AK134203	-8.4534	-0.80987	0.0958041	0.570433	1.75305	6.95584
Acox1	-8.29409	-0.577648	0.0696457	0.670055	1.49241	6.95584
Gpnmb	-8.29103	-0.984846	0.118785	0.50528	1.9791	6.95584
Car8	-8.22217	-0.701192	0.0852807	0.615064	1.62585	6.95584
Tex15	-8.18643	-0.521306	0.0636793	0.696741	1.43525	6.95584
Pak4	-8.17181	-0.227641	0.0278569	0.85403	1.17092	6.95584
Enpp2	-8.16352	-0.938183	0.114924	0.52189	1.91611	6.95584
Serpinb1a	-8.14637	-1.00516	0.123388	0.498215	2.00717	6.95584
Tob1	-8.1384	-0.688667	0.0846194	0.620427	1.61179	6.95584
AK077405	-8.12844	-0.311372	0.0383065	0.805875	1.24089	6.95584
Fam50a	-8.12151	-0.503543	0.0620012	0.705372	1.41769	6.95584
Wdr6	-8.09639	-0.681422	0.0841637	0.62355	1.60372	6.95584
Slc5a3	-8.09435	-1.32348	0.163506	0.399571	2.50268	6.95584
Fdxr	-8.0795	-0.527636	0.0653056	0.69369	1.44157	6.95584
Adora2a	-8.07595	-0.332264	0.0411424	0.794289	1.25899	6.95584
Ces2g	-8.06598	-0.933529	0.115737	0.523576	1.90994	6.95584
Adcy9	-8.06095	-0.251639	0.031217	0.839942	1.19056	6.95584
Chmp4b	-8.05262	-0.19018	0.0236171	0.876497	1.14091	6.95584
Gngt2	-8.03819	-0.751608	0.0935046	0.593941	1.68367	6.95584
Pus7l	-8.00292	-0.234572	0.0293107	0.849937	1.17656	6.95584
Wfdc5	-7.9863	-0.0975688	0.012217	0.934607	1.06997	6.95584
Slc25a32	-7.93352	-0.432294	0.0544896	0.741082	1.34938	6.95584
Rbm20	-7.9108	-0.738399	0.0933407	0.599404	1.66832	6.95584
Cd63	-7.80042	-0.340139	0.0436052	0.789965	1.26588	6.95584
Slco2a1	-7.7965	-0.754761	0.0968076	0.592645	1.68735	6.95584
Aebp1	-7.76607	-0.73762	0.0949798	0.599728	1.66742	6.95584
Pla2g2e	-7.69981	-1.0728	0.139328	0.475395	2.10351	6.95584
Ngfrap1	-7.69136	-0.248455	0.0323031	0.841798	1.18793	6.95584
Bscl2	-7.68065	-0.743638	0.0968198	0.597231	1.67439	6.95584
Gstt3	-7.6741	-0.686538	0.0894618	0.621343	1.60942	6.95584
Lamtor1	-7.66921	-0.238565	0.0311068	0.847588	1.17982	6.95584
Lrp2bp	-7.66175	-0.434318	0.0566865	0.740044	1.35127	6.95584
Tspyl2	-7.65358	-0.379061	0.0495273	0.768938	1.3005	6.95584
Ppp2r1b	-7.64928	-0.346554	0.0453054	0.786461	1.27152	6.95584
Ggct	-7.63864	-0.670993	0.0878419	0.628074	1.59217	6.95584
Galm	-7.6293	-0.915028	0.119936	0.530334	1.88561	6.95584
Syngr1	-7.58894	-0.553911	0.0729892	0.681171	1.46806	6.95584
Gbe1	-7.56957	-0.635557	0.0839621	0.643692	1.55354	6.95584
Ung	-7.55872	-0.643657	0.0851542	0.640089	1.56228	6.95584
Rel	-7.5277	-0.415764	0.0552312	0.749623	1.334	6.95584
Rcan1	-7.50226	-0.316249	0.0421538	0.803156	1.24509	6.95584
Cerk	-7.44515	-0.418255	0.0561783	0.748329	1.33631	6.95584
Bcl7b	-7.4174	-0.325353	0.0438635	0.798103	1.25297	6.95584
Eif3j1	-7.41056	-0.359766	0.0485478	0.779291	1.28322	6.95584
Pdk1	-7.40897	-1.26692	0.170998	0.415546	2.40647	6.95584
Slco2b1	-7.33698	-0.340082	0.0463517	0.789996	1.26583	6.95584
Kctd9	-7.32234	-0.599185	0.0818298	0.660127	1.51486	6.95584
Slc43a2	-7.31865	-1.00976	0.137971	0.496628	2.01358	6.95584
Sec61g	-7.29693	-0.286362	0.0392442	0.819967	1.21956	6.95584
4930461G14Rik	-7.28216	-0.638391	0.087665	0.642429	1.55659	6.95584
Gm19589	-7.28203	-0.0657874	0.00903421	0.955424	1.04666	6.95584
Sesn3	-7.25672	-1.27078	0.175118	0.414435	2.41292	6.95584
Gripap1	-7.25575	-0.227335	0.0313316	0.854212	1.17067	6.95584
Hspa5	-7.21276	-0.304312	0.0421908	0.809828	1.23483	6.95584
Dtnbp1	-7.21211	-0.663237	0.0919616	0.63146	1.58363	6.95584
Tmem19	-7.20662	-0.454565	0.063076	0.72973	1.37037	6.95584
AK019690	-7.20658	-0.808849	0.112238	0.570837	1.75181	6.95584
Orai2	-7.17336	-0.520348	0.072539	0.697204	1.4343	6.95584
Atg4d	-7.15552	-0.275606	0.0385166	0.826103	1.2105	6.95584
Creg1	-7.13236	-0.616209	0.0863963	0.652383	1.53284	6.95584
Acot13	-7.12311	-0.498942	0.0700456	0.707626	1.41318	6.95584
Apip	-7.10882	-0.339226	0.047719	0.790465	1.26508	6.95584
Akr1c13	-7.10286	-0.826611	0.116377	0.563852	1.77351	6.95584
Higd1a	-7.09397	-1.0935	0.154144	0.468625	2.1339	6.95584
Mtch2	-7.06713	-0.280485	0.0396886	0.823314	1.2146	6.95584
Slc29a3	-7.00995	-0.384783	0.0548911	0.765894	1.30566	6.95584
Ssr1	-6.99924	-0.519011	0.0741525	0.69785	1.43297	6.95584
Snrnp70	-6.98399	-0.326936	0.0468123	0.797228	1.25435	6.95584
Cfap36	-6.972	-0.664898	0.0953669	0.630733	1.58546	6.95584
Bdh2	-6.9611	-0.99182	0.14248	0.502843	1.98869	6.95584
Taok3	-6.96092	-0.588337	0.08452	0.665109	1.50351	6.95584
Mrs2	-6.95585	-0.455381	0.0654674	0.729317	1.37115	6.95584
Rqcd1	-6.88645	-0.498627	0.072407	0.70778	1.41287	6.95584
Dpy19l3	-6.84911	-0.217669	0.0317806	0.859954	1.16285	6.95584
Neu1	-6.84747	-0.452895	0.0661405	0.730575	1.36878	6.95584
Fam129a	-6.81653	-0.418419	0.0613829	0.748244	1.33646	6.95584
BC038929	-6.81275	-0.234383	0.0344036	0.850048	1.1764	6.95584
Arntl	-6.81037	-0.609357	0.0894749	0.655489	1.52558	6.95584
Stom	-6.8093	-0.969282	0.142347	0.51076	1.95787	6.95584
AK161748	-6.79226	-0.834917	0.122922	0.560615	1.78375	6.95584
Derl1	-6.78328	-0.411886	0.0607208	0.75164	1.33042	6.95584
Exosc6	-6.7802	-0.451269	0.0665568	0.731399	1.36724	6.95584
Fam162a	-6.77493	-1.40378	0.207202	0.377938	2.64593	6.95584
Me2	-6.76045	-0.485698	0.071844	0.714152	1.40026	6.95584
Cdkl2	-6.73777	-0.802884	0.119162	0.573202	1.74459	6.95584
Sh3bp1	-6.73648	-0.259895	0.0385802	0.835149	1.19739	6.95584
Mrps7	-6.72514	-0.243228	0.0361669	0.844853	1.18364	6.95584
Ascc2	-6.70736	-0.42993	0.0640983	0.742298	1.34717	6.95584
Dnajc3	-6.69167	-0.402212	0.0601063	0.756697	1.32153	6.95584
Gem	-6.68938	-1.70172	0.254392	0.307418	3.2529	6.95584
Leng1	-6.68023	-0.52176	0.078105	0.696522	1.43571	6.95584
Slc38a6	-6.66047	-0.695682	0.104449	0.617417	1.61965	6.95584
Cdc14a	-6.63832	-0.173009	0.0260622	0.886991	1.12741	6.95584
Tubgcp4	-6.63302	-0.214957	0.032407	0.861572	1.16067	6.95584
Bnip3	-6.63245	-1.49431	0.225302	0.354951	2.81729	6.95584
Creld2	-6.62712	-0.357847	0.0539973	0.780328	1.28151	6.95584
Tgfbrap1	-6.6191	-0.118322	0.0178758	0.921259	1.08547	6.95584
Dpp7	-6.58217	-0.513516	0.0780163	0.700513	1.42753	6.95584
Gpkow	-6.56684	-0.323016	0.049189	0.799397	1.25094	6.95584
1700007K13Rik	-6.54078	-1.2753	0.194977	0.413139	2.42049	6.95584
Ube2s	-6.52701	-0.501163	0.0767829	0.706537	1.41535	6.95584
Kpna6	-6.52522	-0.443379	0.0679485	0.73541	1.35979	6.95584
Ncbp1	-6.49565	-0.352179	0.0542177	0.7834	1.27649	6.95584
Myzap	-6.49222	-0.626667	0.0965258	0.647671	1.54399	6.95584
Mrpl3	-6.48143	-0.142083	0.0219216	0.90621	1.1035	6.95584
Acap3	-6.46338	-0.424208	0.0656325	0.745248	1.34184	6.95584
Gtf2h1	-6.44888	-0.485596	0.0752992	0.714202	1.40016	6.95584
Mrps6	-6.44339	-1.20963	0.187732	0.43238	2.31278	6.95584
Gxylt1	-6.43493	-0.567364	0.0881693	0.674849	1.48181	6.95584
Spcs3	-6.4247	-0.417611	0.0650009	0.748663	1.33571	6.95584
Eftud2	-6.41563	-0.274556	0.0427949	0.826705	1.20962	6.95584
Lrrc8e	-6.41148	-0.432109	0.0673962	0.741177	1.3492	6.95584
Mgmt	-6.41088	-0.781323	0.121875	0.581833	1.71871	6.95584
Thoc3	-6.38637	-0.347105	0.0543509	0.78616	1.27201	6.95584
Magt1	-6.38624	-0.312792	0.048979	0.805082	1.24211	6.95584
Npc1	-6.3845	-0.364089	0.0570269	0.77696	1.28707	6.95584
Tpi1	-6.38219	-1.11356	0.174479	0.462154	2.16378	6.95584
AK039882	-6.37955	-0.154795	0.0242643	0.89826	1.11326	6.95584
Cnpy3	-6.37735	-0.390008	0.0611551	0.763126	1.3104	6.95584
Ccne1	-6.3512	-1.05231	0.165686	0.482197	2.07384	6.95584
Cmpk1	-6.34948	-0.261815	0.0412341	0.834038	1.19899	6.95584
E130309D02Rik	-6.34802	-0.331508	0.0522222	0.794705	1.25833	6.95584
Arhgdib	-6.34599	-0.494523	0.0779269	0.709796	1.40886	6.95584
Asrgl1	-6.3211	-0.364335	0.0576379	0.776827	1.28729	6.95584
Dcxr	-6.31127	-0.697997	0.110595	0.616427	1.62225	6.95584
Aldh1l1	-6.29018	-1.19304	0.189667	0.437381	2.28633	6.95584
Lonp1	-6.28911	-0.641831	0.102054	0.640899	1.56031	6.95584
Myef2	-6.25916	-0.381849	0.0610064	0.767453	1.30301	6.95584
Sord	-6.24187	-1.05033	0.168272	0.482857	2.07101	6.95584
Gm3776	-6.2299	-0.461474	0.074074	0.726244	1.37695	6.95584
Tmem158	-6.22529	-0.89064	0.143068	0.539375	1.854	6.95584
Slc35g2	-6.22251	-0.342369	0.055021	0.788745	1.26784	6.95584
Nhlrc3	-6.21835	-0.230031	0.0369923	0.852616	1.17286	6.95584
Srpx2	-6.21102	-0.621348	0.10004	0.650063	1.53831	6.95584
Fgd4	-6.19623	-0.868554	0.140175	0.547695	1.82583	6.95584
Tmed8	-6.19045	-0.360491	0.0582335	0.778899	1.28386	6.95584
Plekho2	-6.18979	-0.224086	0.0362025	0.856137	1.16804	6.95584
Nsun4	-6.18675	-0.248904	0.0402319	0.841535	1.1883	6.95584
Magi3	-6.17286	-0.249614	0.0404374	0.841121	1.18889	6.95584
Tnfrsf26	-6.1617	-1.58868	0.257831	0.332476	3.00774	6.95584
Rrm2	-6.1614	-1.17723	0.191065	0.4422	2.26142	6.95584
Gm11351	-6.15392	-1.63714	0.266032	0.321494	3.11048	6.95584
Arfgef2	-6.12439	-0.28497	0.0465303	0.820759	1.21839	6.95584
Nup98	-6.12416	-0.27201	0.0444158	0.828165	1.20749	6.95584
Egln3	-6.11208	-1.10339	0.180526	0.465423	2.14858	6.95584
Ttll9	-6.1079	-0.391975	0.0641751	0.762086	1.31219	6.95584
Lgmn	-6.10753	-0.49089	0.0803746	0.711586	1.40531	6.95584
Iba57	-6.10466	-0.236574	0.038753	0.848759	1.17819	6.95584
D17Wsu92e	-6.09571	-0.146578	0.024046	0.903391	1.10694	6.95584
Car13	-6.09481	-1.02587	0.168319	0.491113	2.03619	6.95584
Fgfr3	-6.09455	-0.477665	0.0783758	0.718139	1.39249	6.95584
Coprs	-6.07991	-0.66082	0.108689	0.632519	1.58098	6.95584
Ripk3	-6.05533	-0.704107	0.116279	0.613822	1.62914	6.95584
Ppcs	-6.04964	-0.414561	0.0685265	0.750248	1.33289	6.95584
Phospho1	-6.04087	-1.25158	0.207185	0.419989	2.38102	6.95584
Tram1l1	-6.03437	-0.263322	0.043637	0.833167	1.20024	6.95584
Cab39l	-6.02877	-0.954441	0.158314	0.516042	1.93783	6.95584
Id1	-5.99148	-1.62696	0.271545	0.32377	3.08861	6.95584
Ugp2	-5.99102	-0.496367	0.0828518	0.70889	1.41066	6.95584
Snta1	-5.98857	-0.983167	0.164174	0.505868	1.9768	6.95584
Plek2	-5.97236	-0.297113	0.049748	0.81388	1.22868	6.95584
Pmm2	-5.94325	-0.334562	0.0562928	0.793025	1.26099	6.95584
AK154329	-5.93905	-0.517521	0.0871387	0.698571	1.43149	6.95584
Ykt6	-5.93174	-0.327711	0.055247	0.7968	1.25502	6.95584
Sympk	-5.91673	-0.435225	0.0735584	0.739578	1.35212	6.95584
Asna1	-5.90633	-0.513482	0.0869376	0.70053	1.42749	6.95584
Srp9	-5.89068	-0.245388	0.0416569	0.843589	1.18541	6.95584
Psmc3	-5.87221	-0.318283	0.0542015	0.802024	1.24685	6.95584
Ephx1	-5.86101	-0.658287	0.112316	0.63363	1.57821	6.95584
Cyb561d2	-5.85623	-0.41538	0.0709296	0.749822	1.33365	6.95584
Oxr1	-5.85604	-0.500048	0.0853901	0.707083	1.41426	6.95584
Fam149a	-5.85477	-0.164268	0.0280572	0.892381	1.1206	6.95584
Fuca2	-5.84747	-0.562492	0.096194	0.677132	1.47682	6.95584
Dhx33	-5.8241	-0.391394	0.0672025	0.762393	1.31166	6.95584
5031439G07Rik	-5.81335	-0.217395	0.0373958	0.860117	1.16263	6.95584
Ly6c1	-5.80353	-1.46743	0.252851	0.361627	2.76528	6.95584
Tubb4b	-5.80165	-0.630813	0.10873	0.645812	1.54844	6.95584
4930430F08Rik	-5.79851	-0.319358	0.0550758	0.801427	1.24777	6.95584
Ufc1	-5.7875	-0.285807	0.0493835	0.820283	1.21909	6.95584
1700052N19Rik	-5.77759	-0.336468	0.0582368	0.791978	1.26266	6.95584
Fads6	-5.77567	-0.549177	0.0950846	0.68341	1.46325	6.95584
Hnrnph2	-5.77492	-0.388675	0.067304	0.763831	1.30919	6.95584
Shroom2	-5.774	-0.498996	0.0864212	0.707599	1.41323	6.95584
Tnfsf9	-5.7626	-0.849785	0.147466	0.554867	1.80223	6.95584
Ppp1r37	-5.762	-0.234958	0.0407772	0.84971	1.17687	6.95584
Synj2bp	-5.75989	-0.292236	0.0507364	0.816635	1.22454	6.95584
Copb1	-5.75328	-0.176773	0.0307256	0.88468	1.13035	6.95584
Agpat5	-5.7486	-0.671743	0.116853	0.627748	1.593	6.95584
Sstr2	-5.74809	-0.636257	0.11069	0.64338	1.55429	6.95584
Hif1a	-5.74778	-0.752394	0.130902	0.593618	1.68459	6.95584
Ttc1	-5.74776	-0.338463	0.0588861	0.790883	1.26441	6.95584
Os9	-5.72616	-0.291416	0.050892	0.8171	1.22384	6.95584
Slc25a44	-5.725	-0.406391	0.0709852	0.754509	1.32537	6.95584
Timm50	-5.72066	-0.396612	0.0693298	0.75964	1.31641	6.95584
D1Ertd622e	-5.71649	-0.602663	0.105425	0.658537	1.51852	6.95584
Ahcyl1	-5.69655	-0.53557	0.0940166	0.689886	1.44951	6.95584
Eed	-5.66984	-0.440906	0.0777633	0.736672	1.35746	6.95584
Sec11c	-5.66437	-0.67965	0.119987	0.624317	1.60175	6.95584
Mrpl51	-5.65696	-0.207859	0.0367439	0.865821	1.15497	6.95584
Scrn1	-5.65662	-0.555118	0.0981361	0.680601	1.46929	6.95584
A930017M01Rik	-5.65378	-0.293929	0.0519881	0.815678	1.22597	6.95584
Lgals3	-5.65038	-1.03339	0.182888	0.488561	2.04683	6.95584
Nqo2	-5.64634	-0.498088	0.0882144	0.708044	1.41234	6.95584
Slc6a17	-5.63774	-1.02428	0.181683	0.491655	2.03395	6.95584
D030045P18Rik	-5.63722	-0.197106	0.0349652	0.872298	1.1464	6.95584
Tmem97	-5.6351	-0.703318	0.12481	0.614158	1.62825	6.95584
Ccdc125	-5.62845	-0.255042	0.045313	0.837963	1.19337	6.95584
Gfpt1	-5.62027	-0.368177	0.0655088	0.774761	1.29072	6.95584
Spata6	-5.60607	-0.368892	0.0658023	0.774377	1.29136	6.95584
Tnpo3	-5.59226	-0.180018	0.0321905	0.882692	1.1329	6.95584
Nid2	-5.59166	-1.0751	0.192268	0.474639	2.10687	6.95584
Ifi27	-5.59095	-0.753898	0.134843	0.592999	1.68634	6.95584
Gm8817	-5.57677	-0.192615	0.0345388	0.875018	1.14283	6.95584
Acin1	-5.57078	-0.141166	0.0253403	0.906786	1.1028	6.95584
Daxx	-5.56431	-0.232111	0.0417142	0.851388	1.17455	6.95584
Rtfdc1	-5.56335	-0.241333	0.0433791	0.845963	1.18208	6.95584
Ly6a	-5.56165	-0.914774	0.164479	0.530427	1.88527	6.95584
Ino80c	-5.55989	-0.484824	0.0872002	0.714584	1.39941	6.95584
Mlec	-5.5564	-0.591931	0.106531	0.663454	1.50726	6.95584
Mrpl54	-5.54562	-0.452007	0.081507	0.731025	1.36794	6.95584
Rrbp1	-5.54082	-0.350994	0.0633469	0.784044	1.27544	6.95584
Vimp	-5.52355	-0.352739	0.063861	0.783096	1.27698	6.95584
Nmnat3	-5.52342	-0.334678	0.0605926	0.792961	1.2611	6.95584
P2rx6	-5.51191	-0.395135	0.0716876	0.760418	1.31507	6.95584
Slfn3	-5.49352	-0.139062	0.0253138	0.908109	1.10119	6.95584
Hsd11b1	-5.49257	-0.51124	0.0930785	0.701619	1.42527	6.95584
Slc37a2	-5.49052	-0.490859	0.0894012	0.711601	1.40528	6.95584
Mfsd1	-5.48234	-0.408932	0.0745907	0.753181	1.3277	6.95584
Mon1b	-5.48138	-0.28301	0.0516311	0.821875	1.21673	6.95584
Spg21	-5.47005	-0.350619	0.0640979	0.784248	1.27511	6.95584
6430584L05Rik	-5.46154	-0.190745	0.0349251	0.876153	1.14135	6.95584
Mrps15	-5.46086	-0.268371	0.0491445	0.830256	1.20445	6.95584
Atp6v1b2	-5.45982	-0.630389	0.11546	0.646002	1.54798	6.95584
Prim2	-5.45934	-0.583581	0.106896	0.667306	1.49856	6.95584
Fancm	-5.45834	-0.292096	0.0535137	0.816715	1.22442	6.95584
E430025E21Rik	-5.45773	-0.318864	0.0584243	0.801701	1.24735	6.95584
Etfdh	-5.45594	-0.225215	0.0412789	0.855467	1.16895	6.95584
Shq1	-5.45404	-0.296683	0.0543968	0.814122	1.22832	6.95584
Fth1	-5.45179	-0.446768	0.0819489	0.733685	1.36298	6.95584
Pcyox1	-5.44912	-0.289485	0.053125	0.818194	1.2222	6.95584
Eif4e2	-5.44519	-0.151252	0.0277773	0.900468	1.11053	6.95584
Emp3	-5.43643	-0.333772	0.0613956	0.793459	1.2603	6.95584
H2-DMb1	-5.43399	-1.07097	0.197087	0.475998	2.10085	6.95584
Pfas	-5.42914	-0.282573	0.0520476	0.822123	1.21636	6.95584
Wrap53	-5.4214	-0.326753	0.060271	0.797329	1.25419	6.95584
Krt19	-5.41817	-1.99287	0.367813	0.251238	3.98029	6.95584
Ttc14	-5.41597	-0.374192	0.0690905	0.771537	1.29611	6.95584
Scpep1	-5.41233	-0.412074	0.0761363	0.751542	1.3306	6.95584
Ccdc94	-5.40833	-0.234879	0.043429	0.849756	1.17681	6.95584
Wapal	-5.4067	-0.246355	0.0455648	0.843024	1.18621	6.95584
Nup205	-5.39303	-0.419872	0.0778545	0.747491	1.33781	6.95584
Pou2f3	-5.38269	-0.28879	0.0536517	0.818588	1.22162	6.95584
Ddt	-5.37322	-0.590587	0.109913	0.664073	1.50586	6.95584
D5Ertd605e	-5.36555	-0.7373	0.137414	0.599861	1.66705	6.95584
1110008P14Rik	-5.36445	-0.270261	0.05038	0.82917	1.20603	6.95584
Synj1	-5.36238	-0.329447	0.0614368	0.795841	1.25653	6.95584
Rnd1	-5.34779	-1.01814	0.190384	0.493754	2.0253	6.95584
1810026J23Rik	-5.34405	-0.211287	0.0395369	0.863766	1.15772	6.95584
Gdf15	-5.34377	-1.30258	0.243756	0.405402	2.46669	6.95584
Ugt1a6a	-5.33119	-1.23503	0.231662	0.424833	2.35387	6.95584
Exoc4	-5.33049	-0.35005	0.0656694	0.784557	1.27461	6.95584
Rab11fip1	-5.31218	-0.359731	0.0677181	0.77931	1.28319	6.95584
Snx19	-5.30599	-0.113027	0.0213019	0.924646	1.0815	6.95584
Pcx	-5.30593	-0.777619	0.146557	0.583329	1.7143	6.95584
E230013L22Rik	-5.30579	-0.254079	0.0478871	0.838522	1.19257	6.95584
Hddc2	-5.30045	-0.489156	0.0922856	0.712442	1.40362	6.95584
Ccdc22	-5.29712	-0.302788	0.0571608	0.810684	1.23353	6.95584
Tmem45a	-5.29504	-1.235	0.233237	0.424842	2.35382	6.95584
Hmgcl	-5.29139	-0.473772	0.0895364	0.72008	1.38874	6.95584
Ptgr2	-5.29028	-0.279932	0.0529144	0.82363	1.21414	6.95584
Mydgf	-5.28731	-0.333617	0.0630977	0.793545	1.26017	6.95584
Npepps	-5.26216	-0.291762	0.0554453	0.816904	1.22413	6.95584
Sec61a1	-5.25992	-0.278855	0.0530151	0.824245	1.21323	6.95584
Sap30	-5.25535	-0.307126	0.0584407	0.80825	1.23724	6.95584
Bpgm	-5.25497	-0.63172	0.120214	0.645406	1.54941	6.95584
Snf8	-5.25174	-0.351162	0.0668659	0.783952	1.27559	6.95584
Nlrc5	-5.24637	-0.398383	0.075935	0.758708	1.31803	6.95584
Tmem8	-5.24123	-0.562764	0.107372	0.677004	1.4771	6.95584
Hist1h2bj	-5.21994	-0.553876	0.106108	0.681188	1.46802	6.95584
Pdk3	-5.21813	-0.442245	0.0847516	0.735988	1.35872	6.95584
Dnajc2	-5.2161	-0.341422	0.0654554	0.789263	1.267	6.95584
Cops6	-5.2102	-0.284281	0.0545624	0.821151	1.2178	6.95584
Gpr143	-5.20899	-0.0472907	0.00907867	0.967752	1.03332	6.95584
Cndp2	-5.20844	-0.805439	0.154641	0.572188	1.74768	6.95584
Ngdn	-5.20689	-0.43425	0.0833991	0.740078	1.35121	6.95584
Aars	-5.20661	-0.334159	0.0641798	0.793246	1.26064	6.95584
Tmx1	-5.20549	-0.373386	0.0717292	0.771969	1.29539	6.95584
Akap17b	-5.20539	-0.338194	0.0649699	0.791031	1.26417	6.95584
Snx10	-5.20479	-0.445489	0.0855921	0.734336	1.36178	6.95584
Fbxo28	-5.20095	-0.157619	0.0303057	0.896504	1.11544	6.95584
Ufsp2	-5.18838	-0.412392	0.0794837	0.751377	1.33089	6.95584
Fcf1	-5.18383	-0.111883	0.021583	0.92538	1.08064	6.95584
Pgp	-5.18319	-0.483458	0.0932743	0.715261	1.39809	6.95584
Xpr1	-5.18167	-0.215017	0.0414957	0.861536	1.16072	6.95584
AK039878	-5.17992	-0.351573	0.0678722	0.783729	1.27595	6.95584
Ralb	-5.17948	-0.365137	0.0704968	0.776395	1.288	6.95584
Kif3b	-5.17663	-0.25585	0.0494241	0.837493	1.19404	6.95584
Lacc1	-5.17412	-0.95569	0.184706	0.515595	1.93951	6.95584
Hmgcll1	-5.17207	-0.400039	0.0773459	0.757838	1.31954	6.95584
Mtfr1l	-5.16495	-0.317945	0.0615582	0.802212	1.24655	6.95584
Alas1	-5.16148	-0.520512	0.100845	0.697124	1.43446	6.95584
Tmem151a	-5.16067	-0.568146	0.110091	0.674483	1.48262	6.95584
Atp6v1a	-5.15902	-0.680996	0.132001	0.623735	1.60325	6.95584
Col18a1	-5.15189	-0.689446	0.133824	0.620092	1.61266	6.95584
Hc	-5.14524	-0.145036	0.0281884	0.904357	1.10576	6.95584
Coro1a	-5.14396	-0.347301	0.0675163	0.786053	1.27218	6.95584
Cav3	-5.14157	-0.94476	0.18375	0.519516	1.92487	6.95584
Aco1	-5.14079	-0.236524	0.0460092	0.848788	1.17815	6.95584
Dcaf13	-5.12034	-0.470681	0.0919238	0.721624	1.38576	6.95584
Tmem120a	-5.11904	-0.363427	0.0709951	0.777316	1.28648	6.95584
Slc35g1	-5.11275	-0.529436	0.103552	0.692825	1.44337	6.95584
Rps27l	-5.10125	-0.512021	0.100372	0.701239	1.42605	6.95584
Cldn19	-5.09803	-0.0885798	0.0173753	0.940448	1.06332	6.95584
Hist1h2ao	-5.09772	-0.949688	0.186297	0.517744	1.93145	6.95584
Cdsn	-5.09346	-0.442617	0.0868991	0.735799	1.35907	6.95584
2810408I11Rik	-5.08777	-0.85689	0.168422	0.552141	1.81113	6.95584
Adra1b	-5.08661	-0.626491	0.123165	0.64775	1.54381	6.95584
Trim47	-5.08442	-0.504938	0.0993108	0.704691	1.41906	6.95584
Rbm25	-5.07929	-0.351406	0.0691841	0.78382	1.2758	6.95584
Rcc1	-5.07325	-0.458076	0.0902923	0.727956	1.37371	6.95584
4930506M07Rik	-5.07296	-0.192129	0.0378732	0.875313	1.14245	6.95584
Cml1	-5.06869	-0.520152	0.102621	0.697298	1.43411	6.95584
Zbtb7b	-5.06403	-0.291622	0.0575869	0.816983	1.22402	6.95584
Copg1	-5.0639	-0.268463	0.053015	0.830204	1.20452	6.95584
2310022A10Rik	-5.04187	-0.324528	0.0643665	0.79856	1.25225	6.95584
Cdc42bpg	-5.03619	-0.290381	0.057659	0.817686	1.22296	6.95584
Exoc2	-5.03414	-0.220789	0.0438584	0.858096	1.16537	6.95584
Ampd2	-5.02714	-0.553848	0.110172	0.681201	1.468	6.95584
Ccl9	-5.01157	-1.05559	0.210631	0.481099	2.07857	6.95584
Znhit6	-5.00504	-0.345343	0.068999	0.787121	1.27045	6.95584
Id3	-5.00452	-1.53604	0.306931	0.34483	2.89998	6.95584
Stip1	-5.0012	-0.501012	0.100179	0.706611	1.41521	6.95584
AK201904	-4.99722	-1.63441	0.327063	0.322103	3.1046	6.95584
Kif21a	-4.99411	-0.602481	0.120638	0.65862	1.51833	6.95584
Asph	-4.99285	-0.319066	0.0639046	0.801589	1.24752	6.95584
2810025M15Rik	-4.99166	-0.605113	0.121225	0.65742	1.5211	6.95584
Vamp8	-4.99006	-0.37342	0.0748327	0.77195	1.29542	6.95584
Myof	-4.98642	-0.26988	0.0541231	0.829388	1.20571	6.95584
Ppef1	-4.98221	-0.935893	0.187847	0.522719	1.91307	6.95584
Uvrag	-4.97068	-0.310507	0.0624677	0.806358	1.24014	6.95584
Vcp	-4.9677	-0.356812	0.0718264	0.780888	1.28059	6.95584
1190007I07Rik	-4.96619	-0.51839	0.104384	0.698151	1.43236	6.95584
Atp6ap2	-4.96285	-0.332959	0.0670902	0.793907	1.25959	6.95584
Smap2	-4.96001	-0.248343	0.0500691	0.841863	1.18784	6.95584
Arih2	-4.95702	-0.192675	0.0388691	0.874982	1.14288	6.95584
Chfr	-4.9564	-0.247761	0.0499882	0.842202	1.18736	6.95584
Ugdh	-4.95174	-0.435369	0.0879223	0.739505	1.35226	6.95584
Gm14295	-4.94841	-0.516826	0.104443	0.698908	1.4308	6.95584
Sec23b	-4.94216	-0.400407	0.0810186	0.757645	1.31988	6.95584
Spryd4	-4.9386	-0.535162	0.108363	0.690081	1.4491	6.95584
Stxbp2	-4.93656	-0.899156	0.182142	0.5362	1.86497	6.95584
Wnk3	-4.93535	-0.219028	0.0443793	0.859144	1.16395	6.95584
S100a5	-4.93279	-0.396547	0.08039	0.759674	1.31635	6.95584
Snai1	-4.93024	-0.508917	0.103224	0.70275	1.42298	6.95584
AK194623	-4.9212	-0.477039	0.0969354	0.718451	1.39188	6.95584
Atp6v0a2	-4.90322	-0.378	0.0770921	0.769504	1.29954	6.95584
Sgta	-4.90248	-0.198083	0.0404047	0.871708	1.14717	6.95584
Slc35b1	-4.89329	-0.315737	0.0645245	0.803441	1.24465	6.95584
P4ha2	-4.89298	-0.750651	0.153414	0.594335	1.68255	6.95584
Ndufs4	-4.89088	-0.337354	0.0689762	0.791492	1.26344	6.95584
Vps18	-4.88905	-0.229336	0.046908	0.853027	1.1723	6.95584
Abhd12	-4.88705	-0.283823	0.0580766	0.821411	1.21742	6.95584
Riok1	-4.88046	-0.192793	0.0395029	0.874911	1.14297	6.95584
Utp15	-4.87173	-0.311857	0.0640136	0.805604	1.2413	6.95584
Orc2	-4.87153	-0.325557	0.0668284	0.79799	1.25315	6.95584
Rab32	-4.86848	-0.79142	0.16256	0.577775	1.73078	6.95584
Pgm1	-4.86064	-0.407827	0.083904	0.753758	1.32669	6.95584
Micall2	-4.86012	-0.358574	0.0737789	0.779935	1.28216	6.95584
Optn	-4.85859	-0.53085	0.10926	0.692147	1.44478	6.95584
Mro	-4.85583	-0.140919	0.0290205	0.906941	1.10261	6.95584
Timm8a1	-4.85404	-0.608055	0.125268	0.65608	1.5242	6.95584
Plxna2	-4.85109	-0.890015	0.183467	0.539609	1.8532	6.95584
Donson	-4.84911	-0.416968	0.0859884	0.748997	1.33512	6.95584
Micalcl	-4.84809	-0.381246	0.0786383	0.767774	1.30247	6.95584
Mxd4	-4.84595	-0.289214	0.0596816	0.818348	1.22197	6.95584
Aldh4a1	-4.84541	-0.446736	0.0921978	0.733701	1.36295	6.95584
Rab40b	-4.84095	-0.849254	0.175431	0.555072	1.80157	6.95584
Fam214a	-4.83954	-0.382507	0.0790379	0.767104	1.30361	6.95584
Emb	-4.83791	-1.49378	0.308764	0.355082	2.81625	6.95584
Selp	-4.83676	-0.0657438	0.0135925	0.955453	1.04662	6.95584
Cd80	-4.82659	-1.39696	0.289429	0.379729	2.63346	6.95584
Snx8	-4.82229	-0.347686	0.0720998	0.785844	1.27252	6.95584
Dusp22	-4.8172	-0.257956	0.053549	0.836272	1.19578	6.95584
Gclc	-4.81231	-0.286294	0.059492	0.820006	1.2195	6.95584
Fuca1	-4.81155	-0.503093	0.104559	0.705593	1.41725	6.95584
Tmed9	-4.81143	-0.295523	0.061421	0.814777	1.22733	6.95584
Prps2	-4.80326	-0.341257	0.071047	0.789353	1.26686	6.95584
Ano6	-4.80057	-0.205536	0.042815	0.867216	1.15311	6.95584
Ndufb8	-4.79717	-0.408476	0.0851495	0.753419	1.32728	6.95584
Ankrd13a	-4.79091	-0.348608	0.0727644	0.785342	1.27333	6.95584
Itgad	-4.78659	-0.0655606	0.0136967	0.955574	1.04649	6.95584
Ctnnb1	-4.7852	-0.124183	0.0259515	0.917523	1.08989	6.95584
4930579G24Rik	-4.78178	-0.781404	0.163413	0.5818	1.7188	6.95584
Pam16	-4.77922	-0.17799	0.0372424	0.883934	1.13131	6.95584
Nqo1	-4.77468	-0.845471	0.177074	0.556529	1.79685	6.95584
Antxr2	-4.77344	-0.322532	0.0675681	0.799665	1.25052	6.95584
Nr2c2ap	-4.77281	-0.197614	0.0414042	0.871991	1.1468	6.95584
Immt	-4.77064	-0.386761	0.0810711	0.764845	1.30745	6.95584
Ddx56	-4.76854	-0.308702	0.0647373	0.807368	1.23859	6.95584
Xylb	-4.76523	-0.462151	0.096984	0.725903	1.37759	6.95584
Htra1	-4.76469	-1.04229	0.218753	0.485556	2.05949	6.95584
Vps29	-4.76154	-0.40349	0.0847393	0.756027	1.3227	6.95584
Capn7	-4.75359	-0.165115	0.0347349	0.891857	1.12126	6.95584
Hnrnpab	-4.75358	-0.299574	0.0630207	0.812493	1.23078	6.95584
Pdxp	-4.75222	-0.780875	0.164318	0.582014	1.71817	6.95584
Mcm6	-4.75093	-0.474216	0.0998153	0.719858	1.38916	6.95584
Slc25a13	-4.74778	-0.567501	0.11953	0.674785	1.48195	6.95584
Ganab	-4.7463	-0.144177	0.0303766	0.904896	1.1051	6.95584
Aldh5a1	-4.74602	-0.312249	0.0657918	0.805385	1.24164	6.95584
Cdca7	-4.73133	-0.392754	0.0830113	0.761674	1.3129	6.95584
Rragc	-4.73027	-0.329498	0.0696573	0.795813	1.25658	6.95584
Ulbp1	-4.72897	-0.530311	0.112141	0.692406	1.44424	6.95584
Prpf40a	-4.72716	-0.329134	0.0696262	0.796014	1.25626	6.95584
Chordc1	-4.72324	-0.422638	0.0894807	0.746059	1.34038	6.95584
Hmox1	-4.72298	-1.04133	0.220481	0.48588	2.05812	6.95584
Tmem43	-4.72032	-0.340835	0.0722059	0.789584	1.26649	6.95584
Metrnl	-4.71576	-0.706739	0.149867	0.612704	1.63211	6.95584
Baiap2	-4.715	-0.511817	0.108551	0.701339	1.42585	6.95584
Cubn	-4.71404	-0.383232	0.0812959	0.766718	1.30426	6.95584
Sars	-4.71209	-0.183131	0.0388641	0.880789	1.13535	6.95584
Erh	-4.71024	-0.306577	0.0650874	0.808558	1.23677	6.95584
Gprc5c	-4.69854	-0.322441	0.0686259	0.799715	1.25044	6.95584
Cdc42se1	-4.69701	-0.413353	0.0880034	0.750876	1.33178	6.95584
Prelid2	-4.69686	-0.908714	0.193473	0.53266	1.87737	6.95584
Kank1	-4.69352	-0.524924	0.11184	0.694996	1.43886	6.95584
Ehd4	-4.69283	-0.550871	0.117386	0.682608	1.46497	6.95584
Adamts2	-4.68814	-0.29591	0.0631188	0.814559	1.22766	6.95584
AK153656	-4.67667	-0.278048	0.0594543	0.824706	1.21255	6.95584
Dnajc1	-4.67553	-0.177695	0.0380053	0.884115	1.13108	6.95584
Slc2a6	-4.66563	-0.709992	0.152175	0.611323	1.6358	6.95584
Dolpp1	-4.65476	-0.487865	0.10481	0.713079	1.40237	6.95584
Bad	-4.65156	-0.232937	0.0500772	0.850901	1.17522	6.95584
Pfkl	-4.6497	-1.35288	0.29096	0.391511	2.55421	6.95584
Sh3pxd2b	-4.64815	-0.47245	0.101643	0.72074	1.38746	6.95584
Gba	-4.64545	-0.764557	0.164582	0.588634	1.69885	6.95584
Pi4k2b	-4.64339	-0.206926	0.0445636	0.866381	1.15423	6.95584
Mre11a	-4.64027	-0.364363	0.078522	0.776812	1.28731	6.95584
Brwd3	-4.63511	-0.382261	0.0824708	0.767234	1.30338	6.95584
Usp38	-4.62937	-0.250658	0.0541452	0.840513	1.18975	6.95584
Slc35f2	-4.62589	-0.28764	0.0621803	0.819241	1.22064	6.95584
Pmpcb	-4.62386	-0.212881	0.0460396	0.862813	1.159	6.95584
Usp39	-4.61918	-0.296905	0.0642764	0.813997	1.22851	6.95584
Emilin2	-4.61822	-1.47848	0.32014	0.358867	2.78654	6.95584
Sstr1	-4.61069	-0.177731	0.0385476	0.884092	1.1311	6.95584
Ppp1r14b	-4.60979	-0.285072	0.0618407	0.820701	1.21847	6.95584
Stac2	-4.60528	-0.984478	0.213772	0.505409	1.9786	6.95584
Gm4980	-4.59913	-0.353475	0.0768569	0.782697	1.27763	6.95584
Bud31	-4.59864	-0.280143	0.0609185	0.82351	1.21431	6.95584
Ell2	-4.59569	-0.38946	0.0847446	0.763415	1.3099	6.95584
Fh1	-4.59272	-0.295415	0.0643223	0.814838	1.22724	6.95584
Piga	-4.58933	-0.570214	0.124248	0.673517	1.48474	6.95584
Shfm1	-4.58887	-0.192919	0.0420406	0.874834	1.14307	6.95584
Sox6	-4.58838	-0.272135	0.0593096	0.828093	1.20759	6.95584
Mad2l1bp	-4.57672	-0.25651	0.0560467	0.83711	1.19459	6.95584
Polr2d	-4.57371	-0.407446	0.0890843	0.753957	1.32634	6.95584
Mrpl16	-4.57171	-0.327235	0.0715783	0.797063	1.25461	6.95584
Rpa1	-4.57167	-0.692296	0.151432	0.618868	1.61585	6.95584
Golga4	-4.57057	-0.122866	0.0268821	0.918361	1.0889	6.95584
Epb4.1l3	-4.57011	-0.298392	0.065292	0.813158	1.22977	6.95584
Mapk1	-4.56978	-0.125889	0.0275481	0.916439	1.09118	6.95584
Mrpl27	-4.56668	-0.209163	0.045802	0.865039	1.15602	6.95584
Kcmf1	-4.56373	-0.192979	0.0422855	0.874797	1.14312	6.95584
Slc14a2	-4.56314	-0.678183	0.148622	0.624952	1.60012	6.95584
Dis3	-4.5625	-0.429769	0.094196	0.742381	1.34702	6.95584
Pnpo	-4.56005	-0.355792	0.0780238	0.78144	1.27969	6.95584
Nde1	-4.55884	-0.200031	0.0438776	0.870532	1.14872	6.95584
2310069G16Rik	-4.55849	-0.471076	0.10334	0.721426	1.38614	6.95584
Ptdss1	-4.55686	-0.206758	0.0453729	0.866482	1.15409	6.95584
Cops4	-4.55371	-0.20031	0.0439884	0.870363	1.14895	6.95584
Lta4h	-4.55133	-0.280295	0.0615853	0.823423	1.21444	6.95584
Mrps11	-4.55095	-0.455235	0.100031	0.729391	1.37101	6.95584
Aqp1	-4.54965	-1.18252	0.259915	0.440581	2.26973	6.95584
Slc26a2	-4.54756	-0.219982	0.0483736	0.858576	1.16472	6.95584
Trim63	-4.54479	-1.48429	0.326592	0.357424	2.7978	6.95584
Wbscr22	-4.54334	-0.313101	0.0689144	0.80491	1.24238	6.95584
Parp1	-4.54194	-0.306189	0.0674137	0.808775	1.23644	6.95584
Gtf3c6	-4.54076	-0.605893	0.133434	0.657065	1.52192	6.95584
Opa3	-4.53644	-0.437665	0.0964778	0.738328	1.35441	6.95584
Gm4961	-4.53639	-0.218343	0.0481315	0.859552	1.1634	6.95584
Hba-a2	-4.53638	-1.64678	0.363016	0.319352	3.13134	6.95584
Ddx24	-4.53435	-0.325187	0.0717162	0.798195	1.25283	6.95584
Eif2b5	-4.53101	-0.262628	0.0579623	0.833568	1.19966	6.95584
Rassf2	-4.52941	-0.85231	0.188172	0.553897	1.80539	6.95584
Prrg4	-4.52872	-1.06995	0.236259	0.476335	2.09936	6.95584
Bag3	-4.52734	-0.281078	0.0620846	0.822976	1.2151	6.95584
Ston2	-4.5251	-0.414988	0.091708	0.750026	1.33329	6.95584
Mtr	-4.50938	-0.383414	0.0850259	0.766621	1.30443	6.95584
P2rx7	-4.50895	-0.392064	0.0869523	0.762039	1.31227	6.95584
Ak2	-4.50664	-0.30953	0.0686832	0.806904	1.2393	6.95584
Pltp	-4.50472	-0.92985	0.206417	0.524913	1.90508	6.95584
Ldha	-4.5034	-1.05865	0.235077	0.480082	2.08298	6.95584
A230057D06Rik	-4.5026	-0.233682	0.0518994	0.850461	1.17583	6.95584
Map3k7	-4.50194	-0.281058	0.0624305	0.822987	1.21509	6.95584
Tmem14c	-4.49699	-0.296311	0.0658908	0.814332	1.228	6.95584
Ddx39	-4.49533	-0.674151	0.149967	0.626701	1.59566	6.95584
Fig4	-4.49441	-0.320239	0.0712527	0.800937	1.24854	6.95584
Galk1	-4.48617	-0.383283	0.0854365	0.766691	1.30431	6.95584
1110057K04Rik	-4.48417	-0.372264	0.0830173	0.772569	1.29438	6.95584
Tdg	-4.47025	-0.458293	0.102521	0.727847	1.37392	6.95584
Orc1	-4.46904	-0.742077	0.166049	0.597878	1.67258	6.95584
Cbr3	-4.4672	-0.436769	0.0977725	0.738787	1.35357	6.95584
Tmem131	-4.46691	-0.175659	0.0393246	0.885363	1.12948	6.95584
Gtf2e2	-4.46372	-0.41008	0.0918694	0.752582	1.32876	6.95584
Stc1	-4.46332	-0.730786	0.163732	0.602575	1.65954	6.95584
Clec14a	-4.455	-1.53297	0.344102	0.345564	2.89382	6.95584
Kidins220	-4.4533	-0.295685	0.0663968	0.814686	1.22747	6.95584
Ppm1f	-4.45081	-0.229426	0.0515471	0.852974	1.17237	6.95584
Pcyt1a	-4.44827	-0.279591	0.0628538	0.823825	1.21385	6.95584
Katnal2	-4.44653	-0.647653	0.145654	0.638318	1.56662	6.95584
Myo5c	-4.44616	-0.206674	0.0464837	0.866533	1.15402	6.95584
Ndrg3	-4.44392	-0.216859	0.048799	0.860437	1.1622	6.95584
AK008384	-4.4428	-0.499408	0.112408	0.707397	1.41363	6.95584
Ube2q1	-4.44056	-0.260383	0.0586375	0.834866	1.1978	6.95584
Nudt5	-4.43898	-0.534414	0.120391	0.690439	1.44835	6.95584
Prune2	-4.42901	-0.718617	0.162252	0.60768	1.6456	6.95584
Srp72	-4.42269	-0.349035	0.0789193	0.785109	1.27371	6.95584
Kif21b	-4.42142	-0.952509	0.215431	0.516733	1.93524	6.95584
Pdcd6ip	-4.41653	-0.225779	0.0511213	0.855133	1.16941	6.95584
Mreg	-4.41217	-0.437252	0.0991014	0.73854	1.35402	6.95584
Atf6b	-4.41116	-0.184409	0.041805	0.88001	1.13635	6.95584
Pde7b	-4.40453	-0.358252	0.0813373	0.780109	1.28187	6.95584
Vac14	-4.40389	-0.268742	0.0610237	0.830043	1.20476	6.95584
Dhx16	-4.39919	-0.243968	0.0554574	0.84442	1.18425	6.95584
Ermp1	-4.39333	-0.859071	0.19554	0.551308	1.81387	6.95584
Clcn5	-4.39275	-0.426874	0.0971768	0.743872	1.34432	6.95584
Rdh12	-4.38528	-0.391668	0.0893142	0.762248	1.31191	6.95584
Snx15	-4.38101	-0.205971	0.0470145	0.866955	1.15346	6.95584
Cyld	-4.38068	-0.488227	0.11145	0.712901	1.40272	6.95584
Rbm19	-4.38015	-0.236745	0.0540495	0.848658	1.17833	6.95584
Tm2d2	-4.37035	-0.315087	0.0720966	0.803802	1.24409	6.95584
Canx	-4.36934	-0.36779	0.0841752	0.774969	1.29037	6.95584
Mrps10	-4.36933	-0.326084	0.0746302	0.797699	1.25361	6.95584
Ankrd35	-4.36609	-0.140646	0.0322133	0.907113	1.1024	6.95584
Ano3	-4.36134	-0.544796	0.124915	0.685488	1.45881	6.95584
Pwp1	-4.36042	-0.295905	0.0678617	0.814561	1.22766	6.95584
Cd55	-4.35738	-0.836438	0.191959	0.560024	1.78564	6.95584
1110001J03Rik	-4.35528	-0.72353	0.166127	0.605614	1.65122	6.95584
Tmem251	-4.35105	-0.368757	0.0847513	0.774449	1.29124	6.95584
Itsn2	-4.34992	-0.155928	0.0358463	0.897555	1.11414	6.95584
Ndufaf2	-4.33982	-0.35872	0.0826577	0.779856	1.28229	6.95584
Cln5	-4.33819	-0.275958	0.0636112	0.825902	1.2108	6.95584
Ddx20	-4.33476	-0.313848	0.0724026	0.804493	1.24302	6.95584
Ppif	-4.33351	-0.459465	0.106026	0.727256	1.37503	6.95584
Odf2l	-4.33341	-0.405885	0.0936641	0.754773	1.3249	6.95584
Elovl4	-4.33081	-0.469768	0.108471	0.722081	1.38489	6.95584
Mfn1	-4.32421	-0.393276	0.0909473	0.761399	1.31337	6.95584
Vwf	-4.3236	-0.534887	0.123713	0.690213	1.44883	6.95584
3110002H16Rik	-4.3189	-0.44928	0.104026	0.732408	1.36536	6.95584
Vopp1	-4.3179	-0.25232	0.0584358	0.839545	1.19112	6.95584
Nfkbib	-4.31664	-0.347892	0.0805931	0.785732	1.2727	6.95584
Atp6v0a4	-4.31462	-0.43346	0.100463	0.740484	1.35047	6.95584
Cdv3	-4.31219	-0.311338	0.0721994	0.805894	1.24086	6.95584
Hdhd3	-4.31144	-0.297829	0.0690788	0.813475	1.22929	6.95584
Cyfip2	-4.30953	-0.445754	0.103434	0.734201	1.36203	6.95584
Alpl	-4.3074	-0.51736	0.12011	0.698649	1.43133	6.95584
Ascc3	-4.30594	-0.199991	0.0464453	0.870556	1.14869	6.95584
Yipf5	-4.30059	-0.322855	0.0750722	0.799486	1.2508	6.95584
Serp1	-4.30043	-0.356195	0.0828276	0.781222	1.28005	6.95584
Wnt5b	-4.29753	-0.430673	0.100214	0.741916	1.34786	6.95584
Myh7b	-4.29317	-0.185867	0.0432936	0.879121	1.1375	6.95584
Trpm3	-4.29205	-0.124057	0.0289039	0.917604	1.0898	6.95584
Zfp511	-4.29147	-0.280134	0.065277	0.823514	1.21431	6.95584
AK141794	-4.29093	-0.159227	0.0371078	0.895505	1.11669	6.95584
Xdh	-4.29046	-1.29777	0.302479	0.406754	2.45849	6.95584
Sephs2	-4.28871	-0.243218	0.0567111	0.844859	1.18363	6.95584
Naa40	-4.28852	-0.434049	0.101212	0.740182	1.35102	6.95584
Ssr2	-4.28209	-0.437485	0.102166	0.738421	1.35424	6.95584
Fosl1	-4.28167	-1.12925	0.263741	0.457152	2.18745	6.95584
Ppm1g	-4.28122	-0.424252	0.0990962	0.745225	1.34188	6.95584
AK204506	-4.27908	-0.549167	0.128337	0.683415	1.46324	6.95584
Dnajc15	-4.27855	-0.518426	0.121169	0.698133	1.43239	6.95584
Snip1	-4.27661	-0.122913	0.0287407	0.918332	1.08893	6.95584
Cdh17	-4.27321	-0.758399	0.177478	0.591152	1.69161	6.95584
Sec23ip	-4.2728	-0.187496	0.0438812	0.878129	1.13879	6.95584
Ccdc101	-4.26521	-0.278378	0.0652672	0.824517	1.21283	6.95584
Clcn7	-4.2651	-0.268091	0.0628569	0.830418	1.20421	6.95584
Mad1l1	-4.26251	-0.321515	0.0754285	0.800229	1.24964	6.95584
Leo1	-4.2591	-0.372997	0.0875766	0.772177	1.29504	6.95584
Ptgr1	-4.25661	-0.401546	0.0943346	0.757047	1.32092	6.95584
Ddx41	-4.25525	-0.348214	0.0818316	0.785556	1.27298	6.95584
Actl6a	-4.25141	-0.404288	0.0950952	0.755609	1.32344	6.95584
Szrd1	-4.24848	-0.210427	0.0495299	0.864281	1.15703	6.95584
Xpnpep1	-4.24682	-0.508824	0.119813	0.702795	1.42289	6.95584
Snx3	-4.24672	-0.427076	0.100566	0.743768	1.34451	6.95584
Tfg	-4.24056	-0.25917	0.061117	0.835568	1.19679	6.95584
Spr	-4.2391	-0.624061	0.147215	0.648842	1.54121	6.95584
Smim4	-4.23393	-0.990638	0.233976	0.503255	1.98706	6.95584
Rnf40	-4.23099	-0.280505	0.0662977	0.823303	1.21462	6.95584
Fdx1	-4.23077	-0.401716	0.094951	0.756957	1.32108	6.95584
Lap3	-4.22704	-0.584878	0.138366	0.666706	1.49991	6.95584
Gtf2f1	-4.22611	-0.450472	0.106593	0.731803	1.36649	6.95584
Srsf2	-4.22279	-0.447008	0.105856	0.733563	1.36321	6.95584
2900055J20Rik	-4.21835	-0.135708	0.0321708	0.910223	1.09863	6.95584
Naaa	-4.21828	-0.451302	0.106987	0.731382	1.36727	6.95584
Gusb	-4.21725	-0.692379	0.164178	0.618832	1.61595	6.95584
Pde8a	-4.21085	-0.645063	0.153191	0.639465	1.56381	6.95584
Add2	-4.20963	-0.0698878	0.0166019	0.952712	1.04964	6.95584
Atp5s	-4.20836	-0.304501	0.0723561	0.809722	1.23499	6.95584
Cdc27	-4.20513	-0.263968	0.0627729	0.832794	1.20078	6.95584
Vldlr	-4.20329	-0.334457	0.0795703	0.793083	1.2609	6.95584
Mrpl45	-4.20198	-0.285028	0.0678318	0.820726	1.21843	6.95584
Armc1	-4.19881	-0.332448	0.0791767	0.794188	1.25915	6.95584
Ctsk	-4.19821	-0.869587	0.207133	0.547303	1.82714	6.95584
Pdzd11	-4.19754	-0.21969	0.0523377	0.85875	1.16448	6.95584
Nrn1	-4.19544	-1.20882	0.288126	0.432623	2.31148	6.95584
Ndufb2	-4.19186	-0.521069	0.124305	0.696855	1.43502	6.95584
Nup50	-4.19052	-0.343559	0.081985	0.788095	1.26888	6.95584
Dnajc13	-4.18577	-0.354233	0.0846279	0.782285	1.27831	6.95584
Mfsd11	-4.18556	-0.398241	0.0951465	0.758783	1.3179	6.95584
Dennd2c	-4.1855	-0.458226	0.10948	0.727881	1.37385	6.95584
Sec61b	-4.18378	-0.292801	0.0699848	0.816316	1.22502	6.95584
Ociad2	-4.18009	-0.305923	0.0731856	0.808925	1.23621	6.95584
Cobll1	-4.1763	-0.86466	0.20704	0.549176	1.82091	6.95584
Rpn2	-4.17601	-0.349522	0.0836974	0.784844	1.27414	6.95584
Usp5	-4.17143	-0.221596	0.0531224	0.857616	1.16602	6.95584
Sesn2	-4.1698	-0.471857	0.113161	0.721036	1.38689	6.95584
Cars2	-4.1684	-0.300876	0.0721801	0.811759	1.23189	6.95584
Tmem184a	-4.16263	-0.317865	0.0763617	0.802256	1.24648	6.95584
Pdhx	-4.16124	-0.337443	0.0810919	0.791443	1.26352	6.95584
Layn	-4.15933	-0.511362	0.122943	0.70156	1.4254	6.95584
Tlr1	-4.15517	-0.263133	0.0633265	0.833277	1.20008	6.95584
Atp6v0b	-4.15323	-0.55622	0.133924	0.680082	1.47041	6.95584
Tpp1	-4.15184	-0.277701	0.0668863	0.824904	1.21226	6.95584
Drd1	-4.15133	-0.12944	0.0311804	0.914186	1.09387	6.95584
8430426J06Rik	-4.15092	-0.158411	0.038163	0.896011	1.11606	6.95584
Pycrl	-4.14885	-0.361154	0.0870493	0.778541	1.28445	6.95584
Hcls1	-4.14882	-0.100428	0.0242065	0.932756	1.07209	6.95584
Slc25a1	-4.14631	-0.341177	0.0822844	0.789397	1.26679	6.95584
Clpb	-4.1453	-0.356694	0.0860478	0.780952	1.28049	6.95584
Nsf	-4.14116	-0.420328	0.1015	0.747255	1.33823	6.95584
Hnrnpll	-4.14085	-0.31975	0.0772184	0.801209	1.24811	6.95584
Asb5	-4.13818	-0.496355	0.119945	0.708896	1.41064	6.95584
Copz1	-4.13785	-0.289748	0.0700239	0.818045	1.22243	6.95584
Slpi	-4.13486	-0.508784	0.123047	0.702814	1.42285	6.95584
Bfsp2	-4.13154	-0.102001	0.0246884	0.93174	1.07326	6.95584
Ptcra	-4.12985	-0.109779	0.0265817	0.92673	1.07906	6.95584
Tmem18	-4.12538	-0.267024	0.064727	0.831032	1.20332	6.95584
Tmem256	-4.12116	-0.31539	0.0765296	0.803633	1.24435	6.95584
Shc2	-4.1136	-0.279893	0.0680407	0.823652	1.2141	6.95584
Sept3	-4.11145	-0.371845	0.0904413	0.772793	1.29401	6.95584
Mak16	-4.10986	-0.479081	0.116569	0.717434	1.39386	6.95584
Fbxo34	-4.10728	-0.240146	0.0584685	0.846659	1.18111	6.95584
Atp6v1d	-4.10664	-0.56971	0.138729	0.673752	1.48423	6.95584
Wdr36	-4.10419	-0.244498	0.0595727	0.844109	1.18468	6.95584
Aldh3b1	-4.10223	-0.496197	0.120958	0.708973	1.41049	6.95584
Mlx	-4.10108	-0.444966	0.1085	0.734602	1.36128	6.95584
Plbd2	-4.10035	-0.416688	0.101623	0.749142	1.33486	6.95584
Fbxl19	-4.09778	-0.299303	0.0730403	0.812645	1.23055	6.95584
Tmem192	-4.09659	-0.451974	0.110329	0.731042	1.36791	6.95584
Glmp	-4.0886	-0.33627	0.0822458	0.792087	1.26249	6.95584
Ddx1	-4.08698	-0.28485	0.069697	0.820827	1.21828	6.95584
AK086749	-4.08586	-0.413815	0.10128	0.750636	1.3322	6.95584
Exoc1	-4.08578	-0.285704	0.0699262	0.820341	1.219	6.95584
AK135004	-4.08514	-0.256525	0.0627947	0.837102	1.1946	6.95584
Pfkp	-4.08425	-0.59918	0.146705	0.660129	1.51486	6.95584
Nfyc	-4.08384	-0.286635	0.0701875	0.819812	1.21979	6.95584
Tbcb	-4.08161	-0.359596	0.0881015	0.779383	1.28307	6.95584
Cap2	-4.08152	-0.441408	0.108148	0.736416	1.35793	6.95584
Zdhhc20	-4.07673	-0.222822	0.0546571	0.856888	1.16701	6.95584
Grhpr	-4.07612	-0.509502	0.124997	0.702465	1.42356	6.95584
Taldo1	-4.07528	-0.392235	0.0962473	0.761948	1.31242	6.95584
Enc1	-4.07291	-0.495298	0.121608	0.709415	1.40961	6.95584
Abcb6	-4.07131	-0.429825	0.105574	0.742352	1.34707	6.95584
Eif2b4	-4.07018	-0.337424	0.0829013	0.791453	1.2635	6.95584
Mns1	-4.06752	-0.951242	0.233863	0.517187	1.93354	6.95584
Sdf2l1	-4.06337	-0.750391	0.184672	0.594442	1.68225	6.95584
Arhgap18	-4.06232	-1.13405	0.279164	0.455634	2.19474	6.95584
Pctp	-4.05607	-0.444338	0.109549	0.734922	1.36069	6.95584
Lrpprc	-4.05579	-0.271562	0.0669566	0.828422	1.20711	6.95584
Surf4	-4.05562	-0.155289	0.0382898	0.897953	1.11364	6.95584
Tnni2	-4.05358	-0.260823	0.0643439	0.834611	1.19816	6.95584
Slc39a6	-4.05334	-0.40521	0.0999693	0.755127	1.32428	6.95584
Mroh1	-4.05204	-0.511717	0.126286	0.701387	1.42575	6.95584
Peg10	-4.04752	-0.69747	0.17232	0.616653	1.62166	6.95584
Psmd13	-4.04745	-0.351994	0.0869669	0.7835	1.27632	6.95584
Myo10	-4.04692	-0.48513	0.119876	0.714433	1.39971	6.95584
Fam136a	-4.04298	-0.328441	0.0812374	0.796396	1.25566	6.95584
St13	-4.04229	-0.303814	0.0751589	0.810108	1.2344	6.95584
Cmtm4	-4.03818	-0.421345	0.10434	0.746728	1.33918	6.95584
Ranbp10	-4.03467	-0.248706	0.0616424	0.841651	1.18814	6.95584
Dcaf10	-4.03429	-0.265278	0.0657557	0.832039	1.20187	6.95584
C920025E04Rik	-4.03085	-0.473115	0.117374	0.720407	1.3881	6.95584
Tmx2	-4.02929	-0.3677	0.0912566	0.775017	1.29029	6.95584
Hpgd	-4.02825	-1.61586	0.401131	0.326271	3.06494	6.95584
Bcl6	-4.02798	-0.555308	0.137863	0.680512	1.46948	6.95584
Aar2	-4.02645	-0.215848	0.0536074	0.86104	1.16139	6.95584
Tstd2	-4.02337	-0.232431	0.0577702	0.8512	1.17481	6.95584
Pvr	-4.02021	-0.943953	0.234802	0.519807	1.92379	6.95584
Maoa	-4.02008	-1.00199	0.249246	0.499311	2.00276	6.95584
Fam120a	-4.01948	-0.195759	0.0487026	0.873113	1.14533	6.95584
Gss	-4.01738	-0.627705	0.156247	0.647205	1.54511	6.95584
Phtf2	-4.01711	-0.306871	0.0763911	0.808393	1.23702	6.95584
Swi5	-4.0142	-0.388716	0.0968352	0.763809	1.30923	6.95584
Hexa	-4.01359	-0.464336	0.115691	0.724805	1.37968	6.95584
Abhd3	-4.01222	-0.365191	0.0910197	0.776366	1.28805	6.95584
Tbcd	-4.01139	-0.23318	0.0581294	0.850758	1.17542	6.95584
Ndufa13	-4.00989	-0.227492	0.0567327	0.854119	1.1708	6.95584
Nudc	-4.00765	-0.338888	0.0845602	0.790651	1.26478	6.95584
Acad11	-4.00352	-0.318793	0.0796282	0.80174	1.24729	6.95584
Pip4k2c	-3.99835	-0.38233	0.0956219	0.767198	1.30344	6.95584
Ap1s3	-3.9949	-0.645531	0.161589	0.639258	1.56431	6.95584
Phka1	-3.99384	-0.36682	0.0918465	0.77549	1.28951	6.95584
H2afy	-3.99352	-0.173227	0.0433771	0.886857	1.12758	6.95584
BC026208	-3.99149	-0.365981	0.0916902	0.775941	1.28876	6.95584
Entpd4	-3.99086	-0.33265	0.0833531	0.794076	1.25932	6.95584
Drg2	-3.98944	-0.284343	0.0712739	0.821116	1.21786	6.95584
Fkbpl	-3.98835	-0.192801	0.048341	0.874906	1.14298	6.95584
Hsf2	-3.98817	-0.542747	0.136089	0.686462	1.45674	6.95584
Ahi1	-3.98775	-0.353618	0.0886762	0.782619	1.27776	6.95584
Lrrc59	-3.98351	-0.472341	0.118574	0.720794	1.38736	6.95584
Ogdh	-3.98214	-0.469701	0.117952	0.722114	1.38482	6.95584
Bccip	-3.97952	-0.332655	0.0835917	0.794074	1.25933	6.95584
Camkk1	-3.97725	-0.280065	0.0704167	0.823554	1.21425	6.95584
Ddx42	-3.97521	-0.183281	0.0461061	0.880698	1.13546	6.95584
GU332589	-3.9725	-0.48642	0.122447	0.713794	1.40096	6.95584
Zdhhc3	-3.97136	-0.171467	0.0431759	0.887939	1.1262	6.95584
Copb2	-3.97105	-0.229105	0.0576937	0.853164	1.17211	6.95584
Txndc15	-3.96516	-0.196625	0.0495881	0.87259	1.14601	6.95584
Mkx	-3.96494	-0.429223	0.108255	0.742662	1.34651	6.95584
Ltc4s	-3.96098	-0.257322	0.0649641	0.83664	1.19526	6.95584
Anapc7	-3.96035	-0.236483	0.0597126	0.848812	1.17812	6.95584
Uggt1	-3.95886	-0.364173	0.0919894	0.776914	1.28714	6.95584
Prosc	-3.95852	-0.370285	0.0935412	0.77363	1.29261	6.95584
Svop	-3.95849	-0.667174	0.168543	0.629739	1.58796	6.95584
2410131K14Rik	-3.95492	-0.453901	0.114769	0.730066	1.36974	6.95584
Plekha2	-3.9527	-0.57216	0.144752	0.672609	1.48675	6.95584
Ltv1	-3.95215	-0.346029	0.0875547	0.786747	1.27106	6.95584
AK077171	-3.95095	-0.536559	0.135805	0.689413	1.45051	6.95584
Arntl2	-3.9495	-0.451867	0.114411	0.731096	1.36781	6.95584
Adm2	-3.94922	-0.619645	0.156903	0.650831	1.5365	6.95584
Cdkn1a	-3.94547	-0.604784	0.153286	0.65757	1.52075	6.95584
Cipc	-3.94539	-0.291975	0.074004	0.816783	1.22432	6.95584
AY089789	-3.94121	-0.747424	0.189643	0.595666	1.67879	6.95584
Tmem70	-3.93882	-0.368468	0.0935481	0.774604	1.29098	6.95584
Mcm2	-3.93847	-0.607536	0.154257	0.656317	1.52365	6.95584
Tmem208	-3.93378	-0.37744	0.0959484	0.769802	1.29903	6.95584
Map2k6	-3.93339	-0.311091	0.0790898	0.806032	1.24065	6.95584
Angpt4	-3.92836	-0.813449	0.207071	0.56902	1.75741	6.95584
Aagab	-3.92603	-0.268581	0.0684104	0.830136	1.20462	6.95584
Plekhm2	-3.92387	-0.0767206	0.0195523	0.948211	1.05462	6.95584
Clec16a	-3.92263	-0.179176	0.0456774	0.883208	1.13224	6.95584
Ahcyl2	-3.91892	-0.356625	0.091001	0.780989	1.28043	6.95584
1500015A07Rik	-3.91871	-0.124893	0.0318711	0.917072	1.09043	6.95584
Mtm1	-3.91801	-0.601627	0.153554	0.65901	1.51743	6.95584
Ralgapa2	-3.91586	-0.156997	0.0400927	0.89689	1.11496	6.95584
Jtb	-3.91586	-0.211734	0.0540708	0.863499	1.15808	6.95584
Frrs1	-3.91541	-0.87444	0.223333	0.545465	1.8333	6.95584
Slc7a4	-3.91442	-0.323995	0.0827696	0.798855	1.25179	6.95584
Rangap1	-3.91398	-0.525941	0.134375	0.694506	1.43987	6.95584
Itgb1bp1	-3.91321	-0.381149	0.0974004	0.767826	1.30238	6.95584
Arsj	-3.91314	-0.499638	0.127682	0.707284	1.41386	6.95584
Hist1h4b	-3.91133	-0.405699	0.103724	0.754871	1.32473	6.95584
Plod1	-3.90965	-0.605221	0.154802	0.657371	1.52121	6.95584
Srpk1	-3.90908	-0.25387	0.0649435	0.838644	1.1924	6.95584
Tada2b	-3.90539	-0.124244	0.0318135	0.917485	1.08994	6.95584
Rbm38	-3.90476	-0.543994	0.139315	0.68587	1.458	6.95584
Mknk2	-3.90241	-0.284043	0.0727866	0.821286	1.2176	6.95584
Lgals3bp	-3.89676	-1.01098	0.259442	0.496208	2.01528	6.95584
Cnnm1	-3.89424	-0.171974	0.0441612	0.887627	1.1266	6.95584
Evi5l	-3.89042	-0.372866	0.0958421	0.772247	1.29492	6.95584
Rnase1	-3.8895	-0.695328	0.178771	0.617569	1.61925	6.95584
Chaf1b	-3.88676	-0.890339	0.22907	0.539487	1.85361	6.95584
Phf5a	-3.8858	-0.357331	0.0919582	0.780607	1.28105	6.95584
Pqlc2	-3.88556	-0.257526	0.0662777	0.836521	1.19543	6.95584
Brms1	-3.88504	-1.9137	0.492582	0.265411	3.76774	6.95584
Gm5523	-3.88378	-0.152959	0.0393841	0.899404	1.11185	6.95584
Necab3	-3.88292	-0.342173	0.0881225	0.788852	1.26766	6.95584
Spry3	-3.88252	-0.233868	0.0602363	0.850352	1.17598	6.95584
Pgk1	-3.88208	-1.07347	0.276518	0.475176	2.10448	6.95584
Srsf7	-3.88162	-0.400894	0.10328	0.757389	1.32033	6.95584
Add3	-3.87899	-0.462128	0.119136	0.725915	1.37757	6.95584
Myo5a	-3.87889	-0.339356	0.0874879	0.790394	1.26519	6.95584
Klf10	-3.87817	-0.66599	0.171728	0.630256	1.58666	6.95584
Gdap2	-3.87765	-0.260884	0.0672787	0.834577	1.19821	6.95584
Taf2	-3.87683	-0.146518	0.0377932	0.903428	1.10689	6.95584
Nedd4l	-3.874	-0.768873	0.19847	0.586876	1.70394	6.95584
Ak4	-3.87332	-1.178	0.304132	0.441964	2.26263	6.95584
Apmap	-3.87307	-0.257676	0.0665303	0.836434	1.19555	6.95584
Acsl5	-3.87084	-0.330581	0.085403	0.795216	1.25752	6.95584
Atp5l	-3.8705	-0.353203	0.0912552	0.782844	1.27739	6.95584
Atg3	-3.87041	-0.374661	0.0968015	0.771287	1.29654	6.95584
Aim1	-3.86482	-0.379608	0.0982213	0.768647	1.30099	6.95584
Kpnb1	-3.86452	-0.330439	0.0855059	0.795294	1.2574	6.95584
Coq7	-3.86421	-0.470592	0.121782	0.721668	1.38568	6.95584
Irak4	-3.86361	-0.372335	0.0963697	0.772531	1.29445	6.95584
Ift22	-3.86148	-0.225235	0.0583286	0.855456	1.16897	6.95584
P4ha1	-3.86064	-0.685058	0.177447	0.621981	1.60777	6.95584
Phospho2	-3.85896	-0.342659	0.0887958	0.788587	1.26809	6.95584
Erlin1	-3.85773	-0.403671	0.104639	0.755933	1.32287	6.95584
B630005N14Rik	-3.85474	-0.290413	0.0753391	0.817668	1.22299	6.95584
Prpf6	-3.85409	-0.152487	0.0395649	0.899698	1.11148	6.95584
AK140218	-3.85395	-0.353601	0.0917505	0.782628	1.27775	6.95584
Rgs10	-3.85321	-0.438188	0.11372	0.738061	1.3549	6.95584
P4hb	-3.8531	-0.460984	0.11964	0.726491	1.37648	6.95584
Fyttd1	-3.85025	-0.375178	0.0974425	0.77101	1.297	6.95584
Apex2	-3.84984	-0.319379	0.0829589	0.801415	1.24779	6.95584
Nop9	-3.84463	-0.287007	0.0746515	0.819601	1.22011	6.95584
Bax	-3.84415	-0.384795	0.100099	0.765888	1.30567	6.95584
Fam117a	-3.84264	-0.433101	0.112709	0.740668	1.35013	6.95584
Slx4ip	-3.84189	-0.230283	0.0599399	0.852468	1.17306	6.95584
Kif6	-3.83585	-0.175513	0.0457559	0.885453	1.12937	6.95584
Zfp106	-3.83408	-0.293182	0.0764674	0.8161	1.22534	6.95584
Rhod	-3.83154	-0.404336	0.105528	0.755584	1.32348	6.95584
Stxbp6	-3.83091	-0.204431	0.0533635	0.867881	1.15223	6.95584
Aifm1	-3.8269	-0.386391	0.100967	0.765041	1.30712	6.95584
Commd8	-3.82602	-0.232725	0.0608268	0.851026	1.17505	6.95584
Rab22a	-3.82555	-0.12114	0.031666	0.919461	1.08759	6.95584
Cox7a1	-3.8255	-0.836606	0.218692	0.559959	1.78584	6.95584
Rnf181	-3.82495	-0.479828	0.125447	0.717063	1.39458	6.95584
Psmd2	-3.82057	-0.31416	0.0822286	0.804319	1.24329	6.95584
Fgfr2	-3.81746	-0.88045	0.230638	0.543198	1.84095	6.95584
Adck1	-3.81192	-0.179594	0.0471139	0.882951	1.13257	6.95584
Cstf2	-3.80705	-0.309601	0.081323	0.806865	1.23936	6.95584
Ergic2	-3.80652	-0.321817	0.0845437	0.800062	1.2499	6.95584
Abcc4	-3.80575	-0.469715	0.123422	0.722107	1.38484	6.95584
Fam81a	-3.80562	-0.218974	0.0575397	0.859176	1.16391	6.95584
Zfp296	-3.80152	-0.436209	0.114746	0.739074	1.35304	6.95584
Sptbn4	-3.79878	-0.0416868	0.0109737	0.971518	1.02932	6.95584
Uxs1	-3.79795	-0.560731	0.14764	0.677958	1.47502	6.95584
Samd8	-3.79751	-0.15838	0.0417062	0.896031	1.11603	6.95584
Bloc1s2	-3.7938	-0.386076	0.101765	0.765208	1.30683	6.95584
Srd5a3	-3.79259	-0.194413	0.0512613	0.873928	1.14426	6.95584
Atp1a1	-3.79188	-0.232764	0.0613849	0.851003	1.17508	6.95584
Clptm1	-3.79096	-0.308404	0.0813524	0.807535	1.23834	6.95584
Akap8	-3.79023	-0.222055	0.0585862	0.857343	1.16639	6.95584
Supt5	-3.78909	-0.291307	0.0768804	0.817161	1.22375	6.95584
Steap1	-3.78608	-0.812229	0.214531	0.569501	1.75592	6.95584
Slmo2	-3.78215	-0.385278	0.101868	0.765631	1.30611	6.95584
Zc3h18	-3.78186	-0.214295	0.0566638	0.861968	1.16014	6.95584
Snx2	-3.7812	-0.373485	0.0987742	0.771916	1.29548	6.95584
Hpse	-3.77968	-0.623546	0.164973	0.649074	1.54066	6.95584
Abcg1	-3.77959	-0.536543	0.141958	0.689421	1.45049	6.95584
Grn	-3.77774	-0.208073	0.0550786	0.865693	1.15514	6.95584
Baz1a	-3.76905	-0.492593	0.130694	0.710747	1.40697	6.95584
Hsd17b12	-3.76836	-0.285249	0.0756958	0.8206	1.21862	6.95584
Senp2	-3.7669	-0.275424	0.073117	0.826207	1.21035	6.95584
Abat	-3.76363	-0.653228	0.173563	0.635856	1.57268	6.95584
Snai2	-3.76201	-0.356934	0.0948786	0.780822	1.2807	6.95584
Mrpl22	-3.759	-0.295532	0.0786198	0.814772	1.22734	6.95584
Ubap1	-3.7582	-0.237963	0.0633184	0.847942	1.17933	6.95584
Exosc2	-3.75797	-0.35538	0.0945669	0.781664	1.27932	6.95584
Atp5a1	-3.75718	-0.234949	0.0625334	0.849715	1.17687	6.95584
Fam21	-3.75664	-0.268862	0.0715698	0.829974	1.20486	6.95584
Ccdc25	-3.75631	-0.400982	0.106749	0.757343	1.32041	6.95584
Zhx3	-3.75452	-0.355856	0.0947807	0.781406	1.27975	6.95584
Pde1c	-3.75435	-0.177942	0.0473961	0.883963	1.13127	6.95584
Zfp365	-3.75386	-0.58244	0.155158	0.667833	1.49738	6.95584
Pi4ka	-3.75358	-0.264225	0.0703927	0.832646	1.20099	6.95584
Glis3	-3.75352	-0.878205	0.233968	0.544044	1.83809	6.95584
Yrdc	-3.75326	-0.360871	0.0961487	0.778694	1.2842	6.95584
Tex30	-3.75286	-0.624451	0.166393	0.648667	1.54162	6.95584
Dzip1	-3.75014	-0.542313	0.144612	0.686669	1.45631	6.95584
Hnrnpm	-3.7462	-0.346379	0.0924616	0.786556	1.27137	6.95584
Suclg1	-3.74613	-0.212255	0.0566598	0.863187	1.1585	6.95584
Col4a4	-3.74263	-0.0646638	0.0172776	0.956168	1.04584	6.95584
Naa50	-3.74259	-0.403979	0.107941	0.755771	1.32315	6.95584
Agtpbp1	-3.73849	-0.280905	0.0751386	0.823074	1.21496	6.95584
2010107G23Rik	-3.73839	-0.360682	0.0964806	0.778797	1.28403	6.95584
Galr2	-3.73643	-0.312834	0.0837254	0.805059	1.24215	6.95584
Ppm1h	-3.73341	-0.451958	0.121058	0.73105	1.3679	6.95584
Sacm1l	-3.72895	-0.255998	0.0686515	0.837408	1.19416	6.95584
U2af1	-3.72455	-0.459795	0.12345	0.727089	1.37535	6.95584
Fabp7	-3.72213	-0.69623	0.187051	0.617183	1.62027	6.95584
Cds1	-3.72049	-0.433511	0.11652	0.740458	1.35052	6.95584
Trim2	-3.72043	-0.532674	0.143175	0.691272	1.44661	6.95584
5730508B09Rik	-3.71766	-0.475172	0.127815	0.719381	1.39008	6.95584
Myo16	-3.71544	-0.350275	0.0942755	0.784435	1.2748	6.95584
2010111I01Rik	-3.71286	-0.284205	0.076546	0.821194	1.21774	6.95584
Emc3	-3.71201	-0.113809	0.0306596	0.924145	1.08208	6.95584
Ppl	-3.71171	-0.214212	0.0577126	0.862017	1.16007	6.95584
3300005D01Rik	-3.71161	-0.970959	0.2616	0.510167	1.96014	6.95584
Ghitm	-3.70968	-0.295085	0.0795447	0.815024	1.22696	6.95584
Ndufb11	-3.70896	-0.177874	0.047958	0.884005	1.13122	6.95584
Mta2	-3.70752	-0.229328	0.0618548	0.853032	1.17229	6.95584
Chac2	-3.70632	-0.554463	0.149599	0.68091	1.46862	6.95584
Polr3a	-3.70594	-0.0990041	0.026715	0.933677	1.07103	6.95584
Qdpr	-3.70246	-0.383471	0.103572	0.766591	1.30448	6.95584
Gli1	-3.70173	-0.593491	0.160328	0.662737	1.50889	6.95584
Mrpl50	-3.69931	-0.31528	0.0852269	0.803695	1.24425	6.95584
Pnpt1	-3.69784	-0.518801	0.140299	0.697951	1.43276	6.95584
Fen1	-3.69764	-0.755487	0.204316	0.592347	1.6882	6.95584
Sqstm1	-3.6945	-0.303531	0.0821575	0.810267	1.23416	6.95584
Slc25a10	-3.69387	-0.402881	0.109068	0.756346	1.32215	6.95584
Emc1	-3.69328	-0.346783	0.0938957	0.786336	1.27172	6.95584
Ccdc47	-3.69313	-0.326098	0.0882984	0.797691	1.25362	6.95584
Gosr2	-3.69279	-0.21803	0.0590422	0.859739	1.16314	6.95584
Atoh8	-3.69073	-1.48669	0.402818	0.35683	2.80245	6.95584
Trp53rk	-3.68773	-0.186288	0.0505156	0.878864	1.13783	6.95584
Stk17b	-3.68704	-0.502769	0.136361	0.705751	1.41693	6.95584
AK017092	-3.68163	-0.225057	0.0611298	0.855561	1.16882	6.95584
Ostf1	-3.67804	-0.33831	0.091981	0.790968	1.26427	6.95584
Depdc7	-3.67576	-0.764389	0.207954	0.588703	1.69865	6.95584
Dusp9	-3.67503	-0.305351	0.0830879	0.809245	1.23572	6.95584
Wdhd1	-3.67374	-0.584639	0.15914	0.666816	1.49966	6.95584
Hhipl1	-3.67303	-0.614753	0.167369	0.653042	1.5313	6.95584
Mpc2	-3.6698	-0.299304	0.0815588	0.812644	1.23055	6.95584
Nrd1	-3.66585	-0.161914	0.0441681	0.893838	1.11877	6.95584
Ndufb9	-3.66477	-0.288093	0.0786115	0.818984	1.22103	6.95584
Prg4	-3.6646	-1.6184	0.44163	0.325697	3.07034	6.95584
Apol9a	-3.66262	-0.841201	0.229672	0.558179	1.79154	6.95584
Sprtn	-3.66254	-0.178038	0.0486104	0.883904	1.13134	6.95584
Gspt1	-3.66135	-0.311709	0.0851349	0.805687	1.24118	6.95584
Eya3	-3.65964	-0.155232	0.0424173	0.897988	1.1136	6.95584
Gnl1	-3.65694	-0.193164	0.0528213	0.874685	1.14327	6.95584
Fam98a	-3.65654	-0.42068	0.115049	0.747072	1.33856	6.95584
E030003E18Rik	-3.6512	-0.646881	0.17717	0.638659	1.56578	6.95584
Arcn1	-3.64964	-0.175573	0.0481068	0.885416	1.12941	6.95584
Rpl7l1	-3.6492	-0.250841	0.0687387	0.840406	1.1899	6.95584
Fnip2	-3.64658	-0.45968	0.126058	0.727147	1.37524	6.95584
Stard7	-3.64561	-0.350084	0.0960288	0.784539	1.27463	6.95584
Tspan1	-3.64543	-0.0332609	0.009124	0.977209	1.02332	6.95584
Hmgn3	-3.64529	-0.478457	0.131253	0.717745	1.39325	6.95584
Znhit3	-3.644	-0.171358	0.0470248	0.888006	1.12612	6.95584
Nav2	-3.64371	-0.419929	0.115248	0.747461	1.33786	6.95584
Acad9	-3.64066	-0.211316	0.0580434	0.863749	1.15774	6.95584
Slc9a3r1	-3.6361	-0.483888	0.133079	0.715048	1.39851	6.95584
Psmg3	-3.63454	-0.277945	0.0764731	0.824765	1.21247	6.95584
Slc25a33	-3.63313	-0.496512	0.136662	0.708818	1.4108	6.95584
Akr1b3	-3.62977	-0.52996	0.146004	0.692574	1.44389	6.95584
Retsat	-3.62817	-0.282302	0.0778083	0.822278	1.21613	6.95584
Ssfa2	-3.62572	-0.432136	0.119186	0.741164	1.34923	6.95584
Vps45	-3.6256	-0.262475	0.072395	0.833656	1.19953	6.95584
Gmps	-3.62206	-0.344494	0.0951101	0.787584	1.26971	6.95584
Rdh13	-3.621	-0.300611	0.0830189	0.811908	1.23167	6.95584
Tmem101	-3.61805	-0.136868	0.0378293	0.909491	1.09952	6.95584
Evi5l	-3.61622	-0.416773	0.115251	0.749098	1.33494	6.95584
Hspa4	-3.61054	-0.395171	0.109449	0.760399	1.3151	6.95584
Cpne2	-3.60783	-0.592087	0.164112	0.663383	1.50743	6.95584
Ak6	-3.60621	-0.504235	0.139824	0.705034	1.41837	6.95584
2700070H01Rik	-3.60203	-0.131756	0.0365784	0.91272	1.09563	6.95584
Etfa	-3.60046	-0.429312	0.119238	0.742616	1.34659	6.95584
Wdr4	-3.59749	-0.206865	0.0575025	0.866418	1.15418	6.95584
Pom121	-3.59702	-0.266233	0.0740149	0.831488	1.20266	6.95584
Cpped1	-3.59682	-0.437265	0.12157	0.738534	1.35403	6.95584
Mrpl37	-3.59649	-0.252385	0.0701755	0.839507	1.19118	6.95584
Fmr1	-3.59593	-0.234481	0.0652074	0.84999	1.17648	6.95584
Vdac1	-3.59297	-0.245721	0.0683892	0.843394	1.18568	6.95584
Cycs	-3.58893	-0.55592	0.154898	0.680223	1.47011	6.95584
Gadd45a	-3.58744	-0.554364	0.154529	0.680957	1.46852	6.95584
Wdr70	-3.58536	-0.269505	0.0751683	0.829604	1.20539	6.95584
Tnfrsf22	-3.58218	-0.523361	0.146101	0.695749	1.4373	6.95584
Dip2b	-3.58167	-0.187997	0.0524885	0.877824	1.13918	6.95584
Thrb	-3.57785	-0.30307	0.0847074	0.810526	1.23377	6.95584
Cotl1	-3.57773	-0.508467	0.14212	0.702969	1.42254	6.95584
Hey1	-3.57666	-1.05264	0.29431	0.482084	2.07433	6.95584
Rrs1	-3.576	-0.458753	0.128287	0.727615	1.37435	6.95584
3632451O06Rik	-3.57527	-0.607368	0.16988	0.656393	1.52348	6.95584
Rpf2	-3.57143	-0.435933	0.122061	0.739215	1.35279	6.95584
1700084C01Rik	-3.57117	-0.131224	0.0367454	0.913056	1.09522	6.95584
Il17ra	-3.56928	-0.288894	0.080939	0.818529	1.2217	6.95584
Dld	-3.56916	-0.252266	0.0706794	0.839577	1.19108	6.95584
Atp6v1h	-3.56748	-0.505651	0.141739	0.704343	1.41976	6.95584
AK039960	-3.56643	-0.0747731	0.0209658	0.949491	1.0532	6.95584
Psph	-3.5649	-0.633139	0.177603	0.644772	1.55094	6.95584
Tssc4	-3.56304	-0.354201	0.0994097	0.782303	1.27828	6.95584
Rpp25l	-3.56015	-0.384613	0.108033	0.765984	1.30551	6.95584
C230052I12Rik	-3.5588	-0.329074	0.0924679	0.796047	1.25621	6.95584
Slc25a14	-3.55576	-0.441089	0.124049	0.736579	1.35763	6.95584
Pno1	-3.55488	-0.500969	0.140924	0.706632	1.41516	6.95584
Cstb	-3.55467	-0.368888	0.103776	0.774379	1.29136	6.95584
Frmd3	-3.5532	-0.438126	0.123305	0.738093	1.35484	6.95584
Mrps14	-3.55125	-0.40978	0.115391	0.752738	1.32848	6.95584
Cptp	-3.54877	-0.313416	0.0883168	0.804734	1.24265	6.95584
Usp31	-3.54866	-0.180974	0.0509979	0.882107	1.13365	6.95584
Psme3	-3.54674	-0.247909	0.0698979	0.842116	1.18748	6.95584
Ifi202b	-3.5463	-1.29877	0.366233	0.406472	2.4602	6.95584
Lman2	-3.54329	-0.262845	0.0741811	0.833443	1.19984	6.95584
Cyb5b	-3.5426	-0.421198	0.118895	0.746804	1.33904	6.95584
Tmem245	-3.54166	-0.377024	0.106454	0.770024	1.29866	6.95584
Nmt2	-3.54123	-0.335359	0.0947014	0.792587	1.26169	6.95584
Atrip	-3.53917	-0.168989	0.0477481	0.889466	1.12427	6.95584
Eif4a3	-3.5345	-0.114943	0.0325203	0.923419	1.08293	6.95584
Kpna2	-3.53245	-0.732302	0.207307	0.601942	1.66129	8.37886
Nup93	-3.52888	-0.38472	0.10902	0.765928	1.30561	8.37886
Epg5	-3.52367	-0.28653	0.0813156	0.819872	1.2197	8.37886
Tcof1	-3.52274	-0.354212	0.10055	0.782297	1.27829	8.37886
Stxbp4	-3.51895	-0.196909	0.0559568	0.872417	1.14624	8.37886
Duoxa1	-3.5188	-0.666876	0.189518	0.629869	1.58763	8.37886
Atp1b3	-3.51739	-0.441756	0.125592	0.736238	1.35826	8.37886
Vps36	-3.51714	-0.512267	0.145649	0.70112	1.42629	8.37886
Amd2	-3.51683	-0.534033	0.15185	0.690622	1.44797	8.37886
Ubxn4	-3.51465	-0.160428	0.0456456	0.894759	1.11762	8.37886
Ugt1a7c	-3.51447	-0.420415	0.119624	0.74721	1.33831	8.37886
Dmxl2	-3.51285	-0.140131	0.0398909	0.907437	1.102	8.37886
Cenpw	-3.51151	-0.98918	0.281696	0.503764	1.98506	8.37886
Gatsl2	-3.50879	-0.334882	0.095441	0.792849	1.26127	8.37886
Setdb2	-3.50828	-0.392991	0.112018	0.761549	1.31311	8.37886
Nceh1	-3.50632	-0.505049	0.14404	0.704637	1.41917	8.37886
Cuta	-3.50623	-0.401252	0.11444	0.757201	1.32065	8.37886
Sgip1	-3.50527	-0.643685	0.183634	0.640076	1.56231	8.37886
Mapkapk3	-3.50379	-0.407122	0.116195	0.754126	1.32604	8.37886
Atp5o	-3.50168	-0.27437	0.0783538	0.826811	1.20947	8.37886
Ccdc93	-3.50001	-0.224652	0.0641862	0.855801	1.1685	8.37886
Cenpt	-3.49554	-0.343165	0.0981721	0.78831	1.26854	8.37886
Cox10	-3.49458	-0.261907	0.0749465	0.833985	1.19906	8.37886
Slc16a3	-3.49439	-1.69093	0.4839	0.309726	3.22866	8.37886
Fastkd3	-3.49398	-0.37596	0.107602	0.770592	1.2977	8.37886
Nudt22	-3.49264	-0.374673	0.107275	0.77128	1.29655	8.37886
Gdap1l1	-3.49208	-0.397009	0.113688	0.759431	1.31677	8.37886
Scube3	-3.49199	-0.432379	0.12382	0.741039	1.34946	8.37886
Sh3bgrl2	-3.48983	-0.873227	0.25022	0.545925	1.83176	8.37886
Mif	-3.48898	-1.09729	0.314502	0.467393	2.13953	8.37886
Spin2c	-3.48887	-0.301183	0.0863268	0.811587	1.23215	8.37886
Haus7	-3.48874	-0.340947	0.0977278	0.789523	1.26659	8.37886
Psmd14	-3.48665	-0.345958	0.0992236	0.786785	1.27099	8.37886
Psmd9	-3.48645	-0.346956	0.0995156	0.786241	1.27187	8.37886
Cry1	-3.48631	-0.28929	0.082979	0.818305	1.22204	8.37886
Cth	-3.48549	-0.77585	0.222594	0.584044	1.7122	8.37886
Ptger2	-3.48176	-0.17702	0.0508421	0.884528	1.13055	8.37886
Tsc1	-3.48076	-0.309239	0.0888422	0.807068	1.23905	8.37886
Psmd7	-3.48019	-0.270727	0.0777908	0.828902	1.20642	8.37886
Gstp2	-3.47715	-0.77703	0.223467	0.583567	1.7136	8.37886
Diap1	-3.47706	-0.191587	0.0551004	0.875642	1.14202	8.37886
BC027545	-3.47649	-0.28708	0.0825774	0.819559	1.22017	8.37886
Hars	-3.47549	-0.364754	0.10495	0.776601	1.28766	8.37886
Mr1	-3.47362	-0.407314	0.117259	0.754026	1.32621	8.37886
Nhlrc1	-3.47326	-0.363807	0.104745	0.777111	1.28682	8.37886
Vcpkmt	-3.47102	-0.41326	0.11906	0.750925	1.33169	8.37886
Rragd	-3.46633	-0.966624	0.278861	0.511702	1.95426	8.37886
Cacna2d3	-3.46559	-0.0874688	0.0252392	0.941173	1.0625	8.37886
Plekhb1	-3.46452	-0.320675	0.0925598	0.800695	1.24892	8.37886
Sec24a	-3.45947	-0.280315	0.0810283	0.823411	1.21446	8.37886
Tsn	-3.45465	-0.235152	0.0680683	0.849595	1.17703	8.37886
Gramd1b	-3.45325	-0.647083	0.187384	0.63857	1.566	8.37886
Pafah2	-3.45126	-0.491336	0.142364	0.711366	1.40575	8.37886
Minos1	-3.44425	-0.40995	0.119024	0.752649	1.32864	8.37886
C130074G19Rik	-3.44262	-0.571547	0.166021	0.672895	1.48612	8.37886
Esyt3	-3.44116	-0.0586287	0.0170375	0.960176	1.04148	8.37886
Adamts3	-3.43989	-0.128248	0.0372826	0.914942	1.09297	8.37886
Matn3	-3.43691	-0.410767	0.119516	0.752224	1.32939	8.37886
Hsd17b7	-3.43607	-0.243918	0.0709876	0.844449	1.1842	8.37886
Hcfc2	-3.43582	-0.266475	0.077558	0.831348	1.20287	8.37886
Timm23	-3.43552	-0.352839	0.102703	0.783042	1.27707	8.37886
Bsg	-3.43469	-0.487097	0.141817	0.713459	1.40162	8.37886
Pygl	-3.43286	-0.926797	0.269978	0.526025	1.90105	8.37886
Cklf	-3.43283	-0.338892	0.0987209	0.790648	1.26478	8.37886
Uxt	-3.43113	-0.202877	0.0591282	0.868817	1.15099	8.37886
Ccdc96	-3.4295	-0.138967	0.040521	0.908169	1.10112	8.37886
Srsf1	-3.42682	-0.415261	0.12118	0.749884	1.33354	8.37886
Fam20b	-3.42645	-0.202595	0.0591269	0.868986	1.15077	8.37886
Ercc2	-3.42364	-0.589575	0.172207	0.664539	1.5048	8.37886
Adamts4	-3.42274	-0.547529	0.159968	0.684191	1.46158	8.37886
Ube2n	-3.42188	-0.305323	0.0892268	0.809261	1.2357	8.37886
Nr1h4	-3.42045	-0.165086	0.0482643	0.891876	1.12123	8.37886
Nt5dc3	-3.42028	-0.345014	0.100873	0.787301	1.27016	8.37886
AK089957	-3.41883	-0.780896	0.22841	0.582005	1.7182	8.37886
Nampt	-3.4175	-0.419826	0.122846	0.747515	1.33777	8.37886
N6amt2	-3.41731	-0.339186	0.0992552	0.790487	1.26504	8.37886
Akt1s1	-3.41694	-0.169637	0.0496458	0.889066	1.12478	8.37886
Rnf6	-3.41642	-0.410076	0.120031	0.752583	1.32876	8.37886
Rbm28	-3.41516	-0.252545	0.0739484	0.839414	1.19131	8.37886
Tmem135	-3.41391	-0.371893	0.108935	0.772768	1.29405	8.37886
Sim2	-3.41147	-0.109993	0.032242	0.926593	1.07922	8.37886
Enah	-3.41145	-0.596156	0.174751	0.661514	1.51168	8.37886
Tubg1	-3.41052	-0.438901	0.128691	0.737696	1.35557	8.37886
Zmym1	-3.4087	-0.293182	0.0860098	0.8161	1.22534	8.37886
Hecw2	-3.40224	-0.410619	0.12069	0.752301	1.32926	8.37886
Eps15	-3.4007	-0.295772	0.0869739	0.814636	1.22754	8.37886
Defb1	-3.40008	-0.158411	0.0465905	0.896011	1.11606	8.37886
Fastkd5	-3.40007	-0.352893	0.10379	0.783013	1.27712	8.37886
Cmtm8	-3.39908	-0.424862	0.124993	0.74491	1.34244	8.37886
Fam53b	-3.39726	-0.779757	0.229525	0.582465	1.71684	8.37886
Coch	-3.3966	-1.51841	0.44704	0.349069	2.86476	8.37886
Gopc	-3.39351	-0.169364	0.0499081	0.889235	1.12456	8.37886
Myo6	-3.39218	-0.447182	0.131827	0.733474	1.36337	8.37886
Tprn	-3.38994	-0.398317	0.1175	0.758743	1.31797	8.37886
Tnfrsf10b	-3.38767	-0.534671	0.157829	0.690316	1.44861	8.37886
Nudcd2	-3.38736	-0.390241	0.115205	0.763002	1.31061	8.37886
Vnn1	-3.38583	-0.929073	0.2744	0.525196	1.90405	8.37886
4931428F04Rik	-3.38443	-0.24744	0.0731114	0.84239	1.1871	8.37886
Ttc7	-3.38388	-0.20005	0.0591187	0.87052	1.14874	8.37886
Tmem9b	-3.38323	-0.323891	0.0957342	0.798912	1.2517	8.37886
Efemp2	-3.38019	-0.387917	0.114762	0.764232	1.3085	8.37886
Armc9	-3.38019	-0.203362	0.0601628	0.868525	1.15138	8.37886
Ccdc3	-3.37868	-1.85486	0.548989	0.27646	3.61716	8.37886
Lgr4	-3.37769	-0.471683	0.139646	0.721123	1.38673	8.37886
Exosc3	-3.37658	-0.434897	0.128798	0.739747	1.35181	8.37886
Disp2	-3.37653	-0.0712676	0.0211068	0.951801	1.05064	8.37886
Pebp1	-3.3753	-0.317815	0.0941589	0.802284	1.24644	8.37886
Aldh16a1	-3.37414	-0.262694	0.0778552	0.83353	1.19972	8.37886
Emg1	-3.37179	-0.165679	0.0491368	0.891509	1.12169	8.37886
Tacc1	-3.37105	-0.133456	0.0395888	0.911645	1.09692	8.37886
Arl2bp	-3.37104	-0.250655	0.0743554	0.840515	1.18975	8.37886
Gcnt1	-3.36632	-0.40877	0.121429	0.753266	1.32755	8.37886
Bahd1	-3.36405	-0.215124	0.063948	0.861472	1.1608	8.37886
Ints8	-3.36358	-0.304883	0.0906423	0.809508	1.23532	8.37886
Ufd1l	-3.36216	-0.23069	0.0686138	0.852227	1.1734	8.37886
Ddit4l	-3.36206	-1.09986	0.327139	0.466562	2.14334	8.37886
Stx8	-3.36133	-0.348925	0.103806	0.785169	1.27361	8.37886
Haus6	-3.36096	-0.530006	0.157695	0.692552	1.44394	8.37886
Tigd3	-3.36036	-0.210294	0.0625807	0.864361	1.15692	8.37886
Ythdf2	-3.35624	-0.163165	0.0486154	0.893064	1.11974	8.37886
Fbxo16	-3.35558	-0.396419	0.118137	0.759742	1.31624	8.37886
Cacybp	-3.35458	-0.553235	0.164919	0.681491	1.46737	8.37886
Ampd3	-3.3538	-0.775946	0.231363	0.584005	1.71231	8.37886
Pyurf	-3.35378	-0.267704	0.0798216	0.83064	1.20389	8.37886
AK019743	-3.35369	-0.263284	0.0785056	0.833189	1.20021	8.37886
Mob1b	-3.35368	-0.336472	0.100329	0.791976	1.26266	8.37886
Slc8b1	-3.35354	-0.377175	0.112471	0.769944	1.2988	8.37886
Ccnd2	-3.3535	-0.817079	0.24365	0.56759	1.76184	8.37886
Alkbh5	-3.35348	-0.17015	0.0507383	0.88875	1.12518	8.37886
Elof1	-3.3528	-0.200236	0.0597219	0.870408	1.14889	8.37886
2310036O22Rik	-3.34996	-0.221054	0.0659869	0.857939	1.16558	8.37886
Sntb2	-3.34951	-0.447001	0.133453	0.733566	1.3632	8.37886
Rcan2	-3.34816	-1.03263	0.308418	0.488818	2.04575	8.37886
Jak1	-3.34511	-0.205234	0.0613534	0.867398	1.15287	8.37886
AY512912	-3.34249	-0.200419	0.059961	0.870298	1.14903	8.37886
Gmfb	-3.34243	-0.353163	0.105661	0.782866	1.27736	8.37886
AK044622	-3.34136	-0.136261	0.0407802	0.909874	1.09905	8.37886
Thyn1	-3.34129	-0.486118	0.145488	0.713944	1.40067	8.37886
Rassf5	-3.34041	-0.499627	0.149571	0.70729	1.41385	8.37886
Rps19bp1	-3.33638	-0.367443	0.110132	0.775155	1.29006	8.37886
Cep164	-3.33368	-0.278115	0.0834261	0.824668	1.21261	8.37886
Cdc6	-3.33168	-0.436532	0.131024	0.738909	1.35335	8.37886
Vps35	-3.32975	-0.252714	0.0758957	0.839316	1.19145	8.37886
AK053109	-3.32853	-0.441549	0.132656	0.736343	1.35806	8.37886
Eif4e	-3.32784	-0.35875	0.107802	0.77984	1.28231	8.37886
Fam72a	-3.32336	-0.312852	0.0941374	0.805049	1.24216	8.37886
Col6a3	-3.32255	-0.602705	0.181398	0.658518	1.51856	8.37886
Hif1an	-3.32084	-0.211169	0.063589	0.863837	1.15763	8.37886
Dhx38	-3.32073	-0.248966	0.0749732	0.841499	1.18836	8.37886
Suclg2	-3.31963	-0.410402	0.123629	0.752414	1.32906	8.37886
Cd200r2	-3.31942	-0.131	0.0394648	0.913198	1.09505	8.37886
Ccbl2	-3.31912	-0.332347	0.100131	0.794243	1.25906	8.37886
Wasf1	-3.31888	-0.521879	0.157245	0.696464	1.43582	8.37886
Hist1h1t	-3.31494	-0.215744	0.0650822	0.861102	1.1613	8.37886
Sema4b	-3.3139	-0.36746	0.110885	0.775146	1.29008	8.37886
Mmp13	-3.31357	-1.92578	0.58118	0.263198	3.79942	8.37886
Tifa	-3.31244	-0.492519	0.148688	0.710783	1.4069	8.37886
Dbnl	-3.31103	-0.260343	0.0786289	0.83489	1.19776	8.37886
Mvb12a	-3.30867	-0.218824	0.0661366	0.859265	1.16378	8.37886
Cln8	-3.3066	-0.211858	0.0640715	0.863424	1.15818	8.37886
Mrps22	-3.30641	-0.401514	0.121435	0.757063	1.32089	8.37886
Mbd3	-3.30631	-0.22994	0.0695458	0.852671	1.17279	8.37886
Impa1	-3.30569	-0.424797	0.128505	0.744943	1.34238	8.37886
Ptpn11	-3.30547	-0.247558	0.0748933	0.842321	1.1872	8.37886
Nucb2	-3.30484	-0.669339	0.202533	0.628795	1.59034	8.37886
Ptgs1	-3.30424	-0.703928	0.213038	0.613898	1.62893	8.37886
Vgll2	-3.30383	-0.0837621	0.025353	0.943594	1.05978	8.37886
Aim2	-3.30334	-0.440933	0.133481	0.736658	1.35748	8.37886
Chchd10	-3.30313	-0.503844	0.152535	0.705225	1.41799	8.37886
Tex19.1	-3.30162	-0.162117	0.0491022	0.893713	1.11893	8.37886
Lifr	-3.29755	-0.766751	0.232522	0.587739	1.70143	8.37886
Gcnt4	-3.29701	-0.244539	0.0741699	0.844086	1.18471	8.37886
Slirp	-3.29113	-0.35586	0.108127	0.781404	1.27975	8.37886
Npas1	-3.2906	-0.139266	0.0423225	0.907981	1.10134	8.37886
Jmjd6	-3.28999	-0.45466	0.138195	0.729682	1.37046	8.37886
Pld4	-3.28911	-0.0927171	0.0281891	0.937755	1.06638	8.37886
Tmem183a	-3.28889	-0.254694	0.0774405	0.838165	1.19308	8.37886
Mmp15	-3.28818	-0.370729	0.112746	0.773392	1.29301	8.37886
Nars	-3.28815	-0.352306	0.107144	0.783331	1.2766	8.37886
Trmt6	-3.28689	-0.426063	0.129625	0.74429	1.34356	8.37886
Pnn	-3.28672	-0.242764	0.0738618	0.845125	1.18326	8.37886
Pgam1	-3.28666	-0.907298	0.276055	0.533183	1.87553	8.37886
Ddx18	-3.285	-0.264592	0.0805455	0.832434	1.2013	8.37886
Tbc1d8b	-3.28473	-0.322128	0.0980685	0.799889	1.25017	8.37886
Aak1	-3.28372	-0.373196	0.11365	0.77207	1.29522	8.37886
Rnf121	-3.28181	-0.287221	0.0875191	0.819479	1.22029	8.37886
Liph	-3.28143	-0.204514	0.0623247	0.867831	1.1523	8.37886
Prr14l	-3.2814	-0.170809	0.0520536	0.888345	1.12569	8.37886
Glrx2	-3.28083	-0.254359	0.0775288	0.83836	1.19281	8.37886
B3gat3	-3.28002	-0.19902	0.0606765	0.871142	1.14792	8.37886
Tmem127	-3.2798	-0.184839	0.0563568	0.879747	1.13669	8.37886
Banf1	-3.27732	-0.227109	0.0692972	0.854345	1.17049	8.37886
H2-Q7	-3.27694	-0.674183	0.205736	0.626687	1.59569	8.37886
Tsr1	-3.27398	-0.351695	0.107421	0.783663	1.27606	8.37886
Sart3	-3.27176	-0.238328	0.0728439	0.847727	1.17962	8.37886
9530077C05Rik	-3.27143	-0.366337	0.111981	0.77575	1.28908	8.37886
Haus3	-3.26853	-0.415716	0.127187	0.749647	1.33396	8.37886
Rwdd2b	-3.26827	-0.372934	0.114108	0.77221	1.29498	8.37886
Mrpl15	-3.26784	-0.256664	0.0785424	0.837021	1.19471	8.37886
Ripk1	-3.2669	-0.213959	0.065493	0.862168	1.15987	8.37886
Jade3	-3.26654	-0.371693	0.113788	0.772875	1.29387	8.37886
Galnt12	-3.26573	-0.428424	0.131188	0.743073	1.34576	8.37886
Ephb6	-3.26565	-0.218108	0.0667886	0.859692	1.16321	8.37886
Mrpl39	-3.26237	-0.248994	0.0763228	0.841483	1.18838	8.37886
Arhgef2	-3.26183	-0.172597	0.052914	0.887244	1.12709	8.37886
Prpf38a	-3.26125	-0.423049	0.12972	0.745847	1.34076	8.37886
Inhbb	-3.25783	-1.19117	0.365631	0.437949	2.28337	8.37886
Kbtbd11	-3.2554	-0.248056	0.0761984	0.84203	1.18761	8.37886
Strn3	-3.25497	-0.222848	0.068464	0.856872	1.16704	8.37886
Lsm4	-3.25491	-0.384179	0.118031	0.766215	1.30512	8.37886
Timm8b	-3.25301	-0.380547	0.116983	0.768146	1.30184	8.37886
Gde1	-3.25293	-0.356293	0.10953	0.781169	1.28013	8.37886
Chdh	-3.24922	-0.231391	0.0712144	0.851813	1.17397	8.37886
Nos3	-3.24811	-0.0733933	0.0225957	0.9504	1.05219	8.37886
Lrtm2	-3.24811	-0.0733933	0.0225957	0.9504	1.05219	8.37886
Blvra	-3.24781	-0.428568	0.131956	0.742999	1.3459	8.37886
Sf3a1	-3.24656	-0.289865	0.0892837	0.817979	1.22253	8.37886
9530053A07Rik	-3.24541	-0.093303	0.0287492	0.937374	1.06681	8.37886
Alg14	-3.24193	-0.312509	0.096396	0.80524	1.24187	8.37886
Tfpt	-3.23953	-0.224422	0.0692761	0.855938	1.16831	8.37886
I54	-3.23916	-0.558034	0.172277	0.679227	1.47226	8.37886
Kcnc3	-3.23857	-0.0861397	0.026598	0.94204	1.06153	8.37886
Lzic	-3.23796	-0.383542	0.118452	0.766553	1.30454	8.37886
Med17	-3.23176	-0.201238	0.0622688	0.869804	1.14968	8.37886
Smpdl3b	-3.22933	-0.537401	0.166412	0.689011	1.45136	8.37886
AI414108	-3.22887	-0.31071	0.0962288	0.806245	1.24032	8.37886
Tnn	-3.22703	-1.69443	0.525076	0.308976	3.2365	8.37886
Acyp1	-3.22582	-0.386514	0.119819	0.764976	1.30723	8.37886
Pgbd5	-3.22566	-0.31261	0.0969137	0.805184	1.24195	8.37886
Cul2	-3.22533	-0.221965	0.0688193	0.857397	1.16632	8.37886
Fkbp11	-3.22498	-0.350007	0.10853	0.78458	1.27457	8.37886
AK141540	-3.22407	-0.430983	0.133677	0.741756	1.34815	8.37886
Tmbim4	-3.22391	-0.388959	0.120648	0.76368	1.30945	8.37886
Xrcc6bp1	-3.22155	-0.295253	0.0916494	0.814929	1.2271	8.37886
Dot1l	-3.22134	-0.384271	0.119289	0.766166	1.3052	8.37886
Brix1	-3.21958	-0.247374	0.0768343	0.842428	1.18704	8.37886
Scarb1	-3.21819	-0.393959	0.122416	0.761038	1.31399	8.37886
Trabd2b	-3.21793	-0.443287	0.137755	0.735457	1.3597	8.37886
Psme4	-3.21645	-0.342914	0.106612	0.788447	1.26832	8.37886
Enpp5	-3.21617	-0.835693	0.259841	0.560314	1.78471	8.37886
Snhg4	-3.21536	-0.45323	0.140958	0.730406	1.3691	8.37886
Pop5	-3.21453	-0.517193	0.160892	0.69873	1.43117	8.37886
Ppp6c	-3.21355	-0.245224	0.0763096	0.843685	1.18528	8.37886
Atp6ap1	-3.21334	-0.335688	0.104467	0.792406	1.26198	8.37886
AK038969	-3.21286	-0.252803	0.0786849	0.839264	1.19152	8.37886
Gfod1	-3.21279	-0.569475	0.177252	0.673862	1.48398	8.37886
Frk	-3.21198	-0.340262	0.105935	0.789898	1.26599	8.37886
Pfkfb3	-3.21191	-0.910484	0.283471	0.532007	1.87968	8.37886
Rnaseh2b	-3.21086	-0.412481	0.128464	0.75133	1.33097	8.37886
Osbpl9	-3.20834	-0.19895	0.0620103	0.871184	1.14786	8.37886
Cpeb4	-3.20799	-0.269529	0.0840179	0.82959	1.20541	8.37886
Atp6v0c	-3.20772	-0.35859	0.11179	0.779927	1.28217	8.37886
Arl8b	-3.20739	-0.178846	0.0557607	0.883409	1.13198	8.37886
Rrn3	-3.20683	-0.407623	0.127111	0.753864	1.3265	8.37886
Sbno1	-3.20634	-0.195203	0.0608802	0.87345	1.14489	8.37886
Abca4	-3.20602	-0.162789	0.050776	0.893297	1.11945	8.37886
Rab19	-3.20433	-0.2569	0.0801729	0.836884	1.19491	8.37886
Itpk1	-3.20312	-0.250607	0.0782384	0.840543	1.18971	8.37886
Nup35	-3.20268	-0.35199	0.109905	0.783503	1.27632	8.37886
Rgs2	-3.20131	-1.54225	0.481756	0.34335	2.91248	8.37886
Exoc5	-3.20093	-0.325509	0.101692	0.798017	1.25311	8.37886
E2f1	-3.2005	-0.313126	0.0978367	0.804896	1.2424	8.37886
Mkrn1	-3.19959	-0.180303	0.056352	0.882518	1.13312	8.37886
Uso1	-3.19922	-0.385757	0.120578	0.765378	1.30654	8.37886
Espn	-3.19818	-0.407243	0.127336	0.754063	1.32615	8.37886
Rab3gap2	-3.19789	-0.279258	0.0873258	0.824015	1.21357	8.37886
Frmd4b	-3.19705	-0.658746	0.206049	0.633428	1.57871	8.37886
Utp18	-3.19688	-0.410192	0.12831	0.752523	1.32886	8.37886
Fancb	-3.19618	-0.576911	0.1805	0.670397	1.49165	8.37886
Rbm26	-3.19576	-0.167352	0.0523669	0.890476	1.123	8.37886
Mnda	-3.19539	-0.77846	0.243619	0.582989	1.7153	8.37886
Ybx1	-3.19534	-0.387509	0.121273	0.764448	1.30813	8.37886
Sdc4	-3.19493	-0.390998	0.122381	0.762602	1.3113	8.37886
Nubp1	-3.19092	-0.267235	0.0837487	0.83091	1.2035	8.37886
Acer3	-3.18733	-0.206008	0.0646333	0.866933	1.15349	8.37886
Lgals8	-3.18588	-0.201422	0.0632233	0.869693	1.14983	8.37886
Cct8	-3.18587	-0.31293	0.0982242	0.805005	1.24223	8.37886
Gm13154	-3.18428	-0.159013	0.0499369	0.895637	1.11652	8.37886
Lypd6	-3.18351	-0.271278	0.0852134	0.828585	1.20688	8.37886
Mrgprf	-3.18287	-0.924623	0.2905	0.526818	1.89819	8.37886
Smad6	-3.18172	-0.785444	0.246862	0.580173	1.72362	8.37886
Ada	-3.18127	-0.516879	0.162476	0.698882	1.43086	8.37886
Tollip	-3.18026	-0.267975	0.084262	0.830485	1.20412	8.37886
Mrps16	-3.17862	-0.296251	0.0932012	0.814366	1.22795	8.37886
Rfx7	-3.17775	-0.288927	0.0909221	0.81851	1.22173	8.37886
Atp8b5	-3.17591	-0.37174	0.11705	0.77285	1.29391	8.37886
Fabp3	-3.17443	-0.968811	0.305192	0.510927	1.95723	8.37886
1700003F12Rik	-3.17384	-0.333046	0.104935	0.793859	1.25967	8.37886
Malrd1	-3.17383	-0.192645	0.0606979	0.875	1.14286	8.37886
Igf2r	-3.1736	-0.533361	0.168062	0.690943	1.4473	8.37886
Ube2m	-3.17241	-0.355642	0.112104	0.781522	1.27955	8.37886
Hsp90aa1	-3.17235	-0.449935	0.14183	0.732076	1.36598	8.37886
Psmc5	-3.17225	-0.345288	0.108846	0.787151	1.2704	8.37886
Gnpda1	-3.17022	-0.497767	0.157013	0.708202	1.41203	8.37886
Prpf4	-3.16826	-0.138895	0.0438395	0.908215	1.10106	8.37886
Musk	-3.16756	-0.105984	0.0334593	0.929171	1.07623	8.37886
Zcchc4	-3.167	-0.204568	0.0645938	0.867798	1.15234	8.37886
Nudt15	-3.1664	-0.297699	0.0940182	0.813549	1.22918	8.37886
Pparg	-3.16571	-1.44024	0.454951	0.368505	2.71366	8.37886
Esr1	-3.16233	-0.126152	0.039892	0.916272	1.09138	8.37886
Tfe3	-3.16164	-0.205446	0.0649809	0.86727	1.15304	8.37886
Apoe	-3.16155	-1.14291	0.361503	0.452846	2.20826	8.37886
Rbx1	-3.16092	-0.237272	0.0750643	0.848348	1.17876	8.37886
2210016F16Rik	-3.16028	-0.326172	0.10321	0.79765	1.25368	8.37886
Chchd3	-3.16009	-0.158965	0.0503039	0.895667	1.11649	8.37886
Polr2b	-3.15828	-0.162678	0.0515083	0.893365	1.11936	8.37886
Osgepl1	-3.15813	-0.365406	0.115703	0.77625	1.28824	8.37886
Med10	-3.15751	-0.199642	0.0632276	0.870767	1.14841	8.37886
Prpf31	-3.15744	-0.395398	0.125227	0.76028	1.31531	8.37886
Stard4	-3.15573	-0.256234	0.0811965	0.837271	1.19436	8.37886
Cul5	-3.15556	-0.335268	0.106247	0.792637	1.26161	8.37886
Hells	-3.15542	-0.778252	0.24664	0.583073	1.71505	8.37886
Clybl	-3.15522	-0.383572	0.121568	0.766537	1.30457	8.37886
Clk3	-3.15444	-0.119088	0.0377525	0.92077	1.08605	8.37886
Erp44	-3.15243	-0.161484	0.0512253	0.894105	1.11844	8.37886
Pi4kb	-3.15194	-0.331946	0.105315	0.794464	1.25871	8.37886
Gpld1	-3.1519	-0.251924	0.0799276	0.839776	1.19079	8.37886
Aldoa	-3.15077	-0.749069	0.237741	0.594987	1.68071	8.37886
Btbd10	-3.14889	-0.266761	0.0847156	0.831184	1.2031	8.37886
Gal3st3	-3.14784	-0.0823392	0.0261573	0.944525	1.05873	8.37886
Slc27a1	-3.1473	-0.593927	0.18871	0.662537	1.50935	8.37886
Gtf2h3	-3.1443	-0.196299	0.06243	0.872787	1.14575	8.37886
Btbd11	-3.14107	-0.869488	0.276813	0.547341	1.82701	8.37886
Ppard	-3.13933	-0.270759	0.0862476	0.828883	1.20644	8.37886
AK085881	-3.13806	-0.302667	0.0964503	0.810752	1.23342	8.37886
2410016O06Rik	-3.13629	-0.436315	0.139118	0.73902	1.35314	8.37886
Dock5	-3.13585	-0.438275	0.139763	0.738016	1.35498	8.37886
Aldh2	-3.13399	-0.171733	0.0547971	0.887775	1.12641	8.37886
Hist1h2bp	-3.13343	-0.307982	0.0982891	0.807771	1.23797	8.37886
Cdk4	-3.13142	-0.309122	0.0987162	0.807133	1.23895	8.37886
Ran	-3.13109	-0.371583	0.118675	0.772934	1.29377	8.37886
Scg2	-3.12992	-1.61592	0.516282	0.326256	3.06508	8.37886
Arrdc4	-3.1297	-0.519079	0.165856	0.697817	1.43304	8.37886
Aaas	-3.12886	-0.543092	0.173575	0.686298	1.45709	8.37886
Rfx5	-3.1271	-0.478089	0.152885	0.717928	1.3929	8.37886
Tmem263	-3.12679	-0.193253	0.0618056	0.874631	1.14334	8.37886
Hesx1	-3.12554	-0.130967	0.0419022	0.913219	1.09503	8.37886
2510003B16Rik	-3.12501	-0.348333	0.111466	0.785491	1.27309	8.37886
Gene ID	Score(d)	Numerator(r)	Denominator(s+s0)	Fold Change		q-value(%)
Bckdha	26.1971	0.753113	0.0287479	1.68543		0
Pcsk5	21.8829	1.23508	0.0564404	2.35394		0
AK213104	20.0488	1.66474	0.0830343	3.17057		0
Snora28	18.6977	3.41875	0.182843	10.6942		0
Csdc2	17.2675	2.01616	0.11676	4.04505		4.1972
Hsd3b7	16.4434	0.681368	0.0414371	1.60366		4.1972
Mtus1	14.6877	1.33826	0.0911141	2.52846		4.1972
Rpl18	13.8786	0.365223	0.0263156	1.28808		4.1972
Socs2	13.5294	1.07605	0.0795341	2.10825		4.1972
Gprc5d	12.7663	0.0565835	0.00443227	1.04		4.1972
Rpl37a	12.6756	0.641129	0.0505798	1.55955		4.1972
Pycr1	12.6737	0.56969	0.0449506	1.4842		4.1972
Zfp799	12.6325	0.605715	0.0479488	1.52173		4.1972
Frat1	11.8525	0.323852	0.0273234	1.25167		4.1972
Pigv	11.6206	0.293118	0.025224	1.22529		4.1972
Hspb11	11.4288	0.416781	0.0364676	1.33495		4.1972
Arxes1	11.2384	0.839389	0.0746897	1.78929		4.1972
2610008E11Rik	11.2245	0.680429	0.06062	1.60262		4.1972
Chchd5	11.0259	0.466067	0.04227	1.38134		4.1972
AK131739	10.8342	0.209818	0.0193663	1.15654		4.1972
Tsc2	10.7768	1.09941	0.102017	2.14267		4.1972
Zfp30	10.7732	0.291398	0.0270483	1.22383		4.1972
Eif4e3	10.4291	0.755023	0.0723956	1.68766		4.1972
Pvrl2	10.3721	0.472127	0.0455188	1.38715		4.1972
Ttc33	10.2577	0.467494	0.045575	1.38271		4.1972
Foxo1	10.2574	0.532527	0.0519165	1.44646		4.1972
Grcc10	10.1896	0.416107	0.0408363	1.33432		4.1972
Tmem136	10.1329	0.411773	0.0406371	1.33032		4.1972
Rps25	10.0765	0.362235	0.0359484	1.28542		4.1972
Sun2	10.0317	0.61192	0.0609984	1.52829		4.1972
Rps28	9.98871	0.242469	0.0242743	1.18302		4.1972
Mn1	9.82117	0.802547	0.081716	1.74418		4.1972
St7l	9.80705	0.246677	0.025153	1.18647		4.1972
Zdhhc1	9.79567	0.800209	0.0816901	1.74135		4.1972
Rps26	9.57137	0.412224	0.0430685	1.33074		4.1972
Ltbp2	9.44334	1.02464	0.108504	2.03445		4.1972
Nthl1	9.37821	0.286974	0.0306001	1.22008		4.1972
Zfp462	9.36952	0.691211	0.0737723	1.61464		4.1972
Cacnb3	9.34636	0.81029	0.0866958	1.75356		4.1972
Rps10	9.33956	0.485443	0.0519771	1.40002		4.1972
Rps15	9.02943	0.458488	0.050777	1.3741		4.1972
5430435G22Rik	8.79662	0.672529	0.0764531	1.59386		4.49232
Ccng2	8.78097	0.774649	0.088219	1.71077		4.49232
Rpl15	8.67843	0.447662	0.0515832	1.36383		4.49232
Crispld2	8.62612	1.27066	0.147304	2.41272		4.49232
Irf1	8.57737	0.645196	0.0752208	1.56395		4.49232
Tbc1d15	8.55887	0.337945	0.0394847	1.26395		4.49232
Cdkn1c	8.55289	1.30715	0.152831	2.47452		4.49232
Rps18	8.50751	0.448165	0.0526787	1.3643		4.49232
Kifc2	8.26319	0.40612	0.049148	1.32512		4.49232
Stat6	8.19508	0.308007	0.0375843	1.238		4.49232
Mnt	8.14421	0.723737	0.0888652	1.65145		4.49232
Rpsa	8.11659	0.177451	0.0218627	1.13088		4.49232
Cnnm4	8.09139	0.270261	0.0334011	1.20603		4.49232
Tnnc1	8.0578	1.47547	0.183111	2.78074		4.49232
Rara	8.05428	0.432824	0.0537383	1.34987		4.49232
Ccni	8.05049	0.570464	0.0708607	1.485		4.49232
Fam189b	8.04304	0.238661	0.029673	1.1799		4.49232
Rpl36a	7.94739	0.594349	0.0747855	1.50979		4.49232
R74862	7.89358	0.355704	0.0450624	1.27961		4.49232
Eif3k	7.88472	0.257961	0.0327165	1.19579		4.49232
Nedd4	7.88031	0.195053	0.024752	1.14477		4.49232
Rpl24	7.82964	0.420977	0.0537671	1.33883		4.49232
Klhl24	7.80551	1.02113	0.130822	2.02951		4.49232
Zfp658	7.78046	0.474301	0.0609606	1.38925		4.49232
Ccpg1	7.74979	0.774271	0.0999086	1.71033		4.49232
Rpl7a	7.70523	0.441483	0.0572965	1.358		4.49232
March6	7.66886	0.156515	0.0204092	1.11459		4.49232
Lrrc61	7.66354	0.594242	0.0775414	1.50968		4.49232
Eef1a1	7.61973	0.623396	0.0818134	1.5405		4.49232
Rpl22	7.55946	0.425978	0.0563503	1.34348		4.49232
Dirc2	7.43434	0.330769	0.044492	1.25768		4.49232
Rpl27	7.41275	0.190423	0.0256885	1.1411		4.49232
AK196015	7.30171	0.658887	0.0902373	1.57886		4.49232
AK085761	7.2889	0.13467	0.018476	1.09784		4.49232
6720483E21Rik	7.28203	0.0657874	0.00903421	1.04666		4.49232
Plscr3	7.25331	0.398795	0.0549811	1.31841		4.49232
Arhgap39	7.14041	0.404621	0.0566664	1.32374		4.49232
Vmn1r53	7.12541	0.275326	0.03864	1.21027		4.49232
Tgif2	7.09818	0.431369	0.0607718	1.34851		4.49232
Ust	7.06945	0.661777	0.0936108	1.58203		4.49232
Wwc2	7.04638	0.597271	0.0847627	1.51285		4.49232
Gnb2l1	7.01197	0.541411	0.0772124	1.4554		4.49232
Bmpr2	6.97155	0.385507	0.0552972	1.30632		4.49232
Fam101b	6.91507	1.07835	0.155943	2.11163		4.49232
Rps14	6.87981	0.454147	0.0660115	1.36997		4.49232
Map3k14	6.80622	0.565206	0.0830426	1.4796		4.49232
Bgn	6.80148	0.570481	0.083876	1.48502		4.49232
Wbscr17	6.79994	1.13706	0.167217	2.19933		4.49232
Gypc	6.78297	0.391591	0.0577314	1.31184		4.49232
Rpl31	6.7232	0.386413	0.0574746	1.30714		4.49232
Mbtps1	6.72017	0.447945	0.0666568	1.3641		4.49232
Sppl3	6.70991	0.472238	0.0703791	1.38726		4.49232
Rad51d	6.6987	0.248285	0.0370646	1.18779		4.49232
Rpl28	6.69606	0.424625	0.0634142	1.34222		4.49232
Zfp14	6.69276	0.283866	0.0424139	1.21745		4.49232
Rpl14	6.66154	0.350001	0.0525406	1.27456		4.49232
Parva	6.62171	0.331154	0.0500104	1.25802		4.61323
Rhoj	6.61824	0.45742	0.069115	1.37308		4.61323
Zkscan14	6.6127	0.452809	0.0684757	1.3687		4.61323
Pcdhgb7	6.55954	0.391011	0.0596094	1.31131		4.61323
Psmb10	6.5454	0.495941	0.0757693	1.41024		4.61323
Fam84b	6.51603	0.513929	0.0788716	1.42793		4.61323
Rpl3	6.47482	0.42136	0.0650767	1.33919		4.61323
Rras	6.46882	0.729204	0.112726	1.65772		4.61323
Tead3	6.46285	0.378972	0.0586385	1.30041		4.61323
Rpl4	6.45173	0.547392	0.0848442	1.46144		4.61323
Xirp1	6.44571	0.0285692	0.00443227	1.02		4.61323
Klhl9	6.44236	0.218656	0.0339404	1.16365		4.61323
Zfp775	6.43005	0.373725	0.0581217	1.29569		4.61323
Fam120b	6.42397	0.160837	0.025037	1.11794		4.61323
Rpl11	6.40227	0.35505	0.055457	1.27903		4.61323
Iglon5	6.37899	1.14861	0.180061	2.217		4.61323
Skil	6.36335	0.397653	0.0624911	1.31736		4.61323
Ext1	6.35562	0.888892	0.139859	1.85175		4.61323
Endov	6.33051	0.378572	0.0598011	1.30005		4.61323
Rnf214	6.31816	0.310117	0.0490834	1.23981		4.61323
Ccdc62	6.2949	0.139423	0.0221485	1.10146		4.61323
Rpl18a	6.28906	0.546438	0.0868871	1.46048		4.61323
Cadm2	6.24677	0.394464	0.0631467	1.31445		4.61323
Wisp1	6.20486	0.515231	0.0830367	1.42922		4.61323
Peg13	6.16185	0.656032	0.106467	1.57574		4.61323
Rxrb	6.1406	0.475052	0.0773625	1.38997		4.61323
P4ha3	6.13694	0.893038	0.145518	1.85708		4.61323
Rps29	6.13564	0.404993	0.0660065	1.32408		4.61323
AK020711	6.1253	0.534622	0.087281	1.44856		4.61323
C1qtnf3	6.12017	1.51405	0.247387	2.85611		4.61323
Crbn	6.07902	0.464474	0.0764061	1.37981		4.61323
C920021L13Rik	6.0352	0.098628	0.0163421	1.07075		4.83576
Ifi47	6.02375	0.941519	0.156301	1.92055		4.83576
Rpl29	6.01761	0.346656	0.0576069	1.27161		4.83576
Sfxn3	5.97151	0.601564	0.100739	1.51736		4.83576
Ubald1	5.95139	0.553259	0.0929629	1.4674		4.83576
Fzd7	5.94808	0.206429	0.0347052	1.15383		4.83576
Rps11	5.93857	0.40769	0.0686511	1.32656		4.83576
Ankzf1	5.93161	0.477753	0.0805436	1.39257		4.83576
Tgif1	5.92867	0.655445	0.110555	1.5751		4.83576
Wdr45	5.92163	0.840647	0.141962	1.79085		4.83576
Harbi1	5.89704	0.479752	0.0813547	1.3945		4.83576
Spock3	5.8837	0.245622	0.0417462	1.1856		4.83576
Fbxo36	5.88212	0.514388	0.0874494	1.42839		4.83576
Hic2	5.84603	0.314203	0.0537463	1.24332		4.83576
Zfp661	5.84335	0.374321	0.0640593	1.29623		4.83576
Slc12a8	5.82951	0.232095	0.0398138	1.17454		4.83576
Rbms1	5.82729	0.340626	0.0584536	1.26631		4.83576
Cntfr	5.81325	0.558504	0.0960744	1.47274		4.83576
Rpl32	5.81321	0.423345	0.0728246	1.34103		4.83576
Nuak1	5.81145	0.508164	0.0874419	1.42224		4.83576
2900097C17Rik	5.80194	0.389779	0.0671808	1.31019		4.83576
Rps6	5.79303	0.452667	0.07814	1.36857		4.83576
Eef2	5.77294	0.752354	0.130324	1.68454		4.83576
Adamts10	5.76853	1.42472	0.246981	2.68462		4.83576
Dlg4	5.75431	0.235003	0.0408394	1.17691		4.83576
Zkscan7	5.75166	0.347721	0.0604558	1.27255		4.83576
Arxes2	5.75033	0.639153	0.111151	1.55741		4.83576
Farp1	5.68292	0.369054	0.0649408	1.29151		4.83576
Prkacb	5.66996	0.376702	0.0664382	1.29837		4.83576
Rpl10a	5.66818	0.597755	0.105458	1.51336		4.83576
Gnb5	5.65709	0.336907	0.0595549	1.26305		4.83576
Pdzrn3	5.65104	0.61717	0.109214	1.53386		4.83576
Bmyc	5.64802	0.671202	0.118839	1.5924		4.83576
Iah1	5.63302	0.457607	0.0812364	1.37326		4.83576
Nbeal1	5.63279	0.260039	0.0461653	1.19751		4.83576
BC040690	5.63048	0.68648	0.121922	1.60935		4.83576
AK011205	5.61121	0.386555	0.0688897	1.30727		4.83576
AK012478	5.58203	0.0835722	0.0149716	1.05964		4.83576
Itgb5	5.56813	0.467372	0.0839369	1.38259		4.83576
Rpl8	5.56452	0.242846	0.0436419	1.18332		4.83576
Rpl10	5.55216	0.496636	0.0894491	1.41092		4.83576
Fbln5	5.54797	0.728029	0.131224	1.65638		4.83576
Acvr1b	5.51093	0.339691	0.0616394	1.26549		4.83576
Zscan2	5.49954	0.498831	0.0907042	1.41307		4.83576
Ccdc162	5.49221	0.641702	0.116839	1.56017		4.83576
Rps8	5.49062	0.458115	0.0834359	1.37375		4.83576
Rpl26	5.49021	0.342092	0.0623094	1.26759		4.83576
6330419J24Rik	5.48996	0.725765	0.132199	1.65378		4.83576
Sema7a	5.48914	0.710613	0.129458	1.6365		4.83576
1600020E01Rik	5.48168	0.852364	0.155493	1.80546		4.83576
Gabbr1	5.47017	0.582276	0.106446	1.49721		6.12405
Tceal3	5.45431	0.702365	0.128772	1.62717		6.12405
Fbxo38	5.44392	0.128658	0.0236333	1.09328		6.12405
Lmbr1l	5.44165	0.705899	0.129722	1.63116		6.12405
AB341725	5.44094	0.297892	0.05475	1.22935		6.12405
Cadm3	5.43522	1.27296	0.234205	2.41657		6.12405
Il11	5.40598	0.599351	0.110868	1.51504		6.12405
Arrdc2	5.3929	0.552558	0.10246	1.46668		6.12405
Chd6	5.38755	0.381732	0.0708545	1.30291		6.12405
Eef1b2	5.37381	0.290427	0.0540449	1.223		6.12405
Gm9079	5.37124	0.21886	0.0407467	1.16381		6.12405
Vps37d	5.37096	0.43737	0.0814323	1.35413		6.12405
Tmco6	5.35185	0.917695	0.171472	1.8891		6.12405
Cdc42ep5	5.34224	0.733763	0.137351	1.66297		6.12405
Atp5g2	5.34215	0.211594	0.0396084	1.15797		6.12405
Pid1	5.33509	0.690763	0.129475	1.61414		6.12405
Gltscr1l	5.32988	0.521427	0.097831	1.43537		6.12405
Triqk	5.30572	0.577528	0.10885	1.49229		6.12405
Rpl19	5.30274	0.175447	0.0330862	1.12931		6.12405
Erlec1	5.30204	0.236256	0.0445594	1.17793		6.12405
AK217348	5.30178	0.160474	0.0302679	1.11765		6.12405
Gli3	5.30173	0.418105	0.0788619	1.33617		6.12405
Rpl37	5.29824	0.45167	0.085249	1.36762		6.12405
Rps4x	5.29614	0.573721	0.108328	1.48836		6.12405
Tmem50a	5.28644	0.315809	0.0597394	1.24471		6.12405
Crebrf	5.2801	0.972227	0.18413	1.96187		6.12405
Erap1	5.27877	0.565889	0.107201	1.4803		6.12405
Zbtb44	5.26034	0.208337	0.0396052	1.15536		6.12405
Col27a1	5.25553	1.15774	0.22029	2.23108		6.12405
5730409E04Rik	5.25428	0.199453	0.0379601	1.14826		6.12405
Dpy19l1	5.25279	0.536224	0.102084	1.45017		6.12405
Cish	5.24326	0.778541	0.148484	1.71539		6.12405
Casp12	5.23834	0.748839	0.142953	1.68044		6.12405
Moxd1	5.22375	0.258751	0.0495336	1.19644		6.12405
Ascc1	5.22303	0.349112	0.066841	1.27378		6.12405
Mvb12b	5.21678	0.330397	0.0633335	1.25736		6.12405
Rpl36	5.2149	0.488232	0.0936225	1.40272		6.12405
Dgkd	5.1827	0.44269	0.0854169	1.35914		6.12405
Ndufs2	5.18053	0.232691	0.0449165	1.17502		6.12405
Gabarapl1	5.1745	0.359204	0.0694181	1.28272		6.12405
Tmem44	5.17418	0.471806	0.0911846	1.38684		6.12405
Plekhm3	5.1701	0.313787	0.0606925	1.24297		6.12405
Rpl6	5.16676	0.419976	0.0812843	1.33791		6.12405
Kcnab1	5.15248	0.907675	0.176163	1.87602		6.12405
Emx2	5.15039	0.511194	0.0992536	1.42523		6.12405
Prickle3	5.1381	0.390682	0.0760362	1.31101		6.12405
Cldn1	5.12295	0.879656	0.171709	1.83994		6.12405
Spsb1	5.11746	0.653256	0.127652	1.57271		6.12405
Unc50	5.11636	0.257432	0.0503154	1.19535		6.12405
Zswim4	5.09045	0.625211	0.12282	1.54244		6.12405
Ldb1	5.08449	0.326192	0.0641544	1.2537		6.12405
Tmem204	5.08422	1.18986	0.23403	2.28131		6.12405
Rpl27a	5.06951	0.377881	0.0745399	1.29943		6.12405
Poglut1	5.06353	0.158824	0.0313663	1.11638		6.12405
Lingo1	5.06142	0.332121	0.0656181	1.25886		6.12405
Slc9a3r2	5.05844	0.75079	0.148423	1.68271		6.12405
Akap10	5.05541	0.125525	0.0248298	1.0909		6.12405
Iars2	5.03934	0.192339	0.0381674	1.14261		6.12405
Tfap4	5.03496	0.555423	0.110313	1.4696		6.12405
Rps16	5.03456	0.450626	0.0895064	1.36663		6.12405
Pcdhga11	5.02827	0.350953	0.069796	1.2754		6.12405
Gm20605	5.01506	0.349194	0.0696291	1.27385		6.12405
Gigyf1	5.01129	0.575375	0.114816	1.49006		6.12405
Ghr	5.00635	1.21602	0.242895	2.32305		6.12405
Rplp1	4.99137	0.244789	0.0490425	1.18492		6.12405
Osr1	4.97963	1.09944	0.220787	2.14271		6.12405
Loh12cr1	4.97825	0.2461	0.0494349	1.186		6.12405
AK145301	4.96338	0.829895	0.167204	1.77756		6.12405
Calcoco1	4.94144	0.685405	0.138706	1.60815		6.12405
Zdhhc17	4.93258	0.290177	0.0588286	1.22279		6.65746
Vsig10l	4.93233	0.431407	0.0874651	1.34855		6.65746
Tep1	4.92354	0.243503	0.0494569	1.18386		6.65746
Gpr157	4.92157	0.32305	0.0656397	1.25097		6.65746
Nr1d2	4.91589	0.382475	0.0778038	1.30358		6.65746
Gpbp1l1	4.91204	0.470279	0.09574	1.38538		6.65746
Rpl17	4.88762	0.577019	0.118057	1.49176		6.65746
Fhl4	4.88662	0.5135	0.105083	1.42751		6.65746
Csnk1e	4.86914	0.321105	0.0659469	1.24929		6.65746
Pxmp4	4.86181	0.411188	0.0845749	1.32978		6.65746
Ston1	4.85157	0.689118	0.14204	1.6123		6.65746
Sema4c	4.85105	0.672311	0.138591	1.59362		6.65746
Pigg	4.85076	0.160505	0.0330887	1.11768		6.65746
Tspan4	4.84864	0.560541	0.115608	1.47482		6.65746
Cfap126	4.84625	0.288863	0.0596055	1.22168		6.65746
Cdk5rap3	4.83992	0.153385	0.0316917	1.11218		6.65746
Tmsb10	4.83441	0.466326	0.0964598	1.38159		6.65746
Palm	4.83278	0.227776	0.0471314	1.17103		6.65746
Pim3	4.82655	0.576085	0.119358	1.4908		6.65746
Runx1	4.81777	0.424493	0.0881099	1.3421		6.65746
Jag1	4.79754	1.00383	0.209239	2.00532		6.65746
B4galt4	4.79469	0.414494	0.0864485	1.33283		6.65746
9130221H12Rik	4.78944	0.424334	0.0885979	1.34195		6.65746
Gm11517	4.78778	0.27987	0.058455	1.21409		6.65746
Npy6r	4.786	0.355152	0.0742066	1.27912		6.65746
Rnf38	4.78566	0.376282	0.078627	1.29799		6.65746
Kxd1	4.77126	0.619098	0.129756	1.53591		6.65746
AK192647	4.76648	1.0937	0.229457	2.13421		6.65746
Pttg1ip	4.73653	0.208189	0.0439539	1.15524		6.65746
1500012F01Rik	4.7258	1.02404	0.216692	2.03361		6.65746
Kat8	4.72448	0.409866	0.0867536	1.32856		6.65746
Chst15	4.723	0.72284	0.153047	1.65043		6.65746
Klf13	4.71712	0.755256	0.16011	1.68793		6.65746
Cnppd1	4.71279	0.404629	0.0858575	1.32375		6.65746
Zc3h6	4.70959	0.400527	0.0850449	1.31999		6.65746
Ikzf2	4.70749	0.34353	0.0729751	1.26886		6.65746
Cyba	4.70034	0.508013	0.10808	1.42209		6.65746
Arhgef25	4.68732	0.609561	0.130045	1.52579		6.65746
Mapk1ip1	4.68349	0.611771	0.130623	1.52813		6.65746
Xpc	4.67852	0.214978	0.0459499	1.16069		6.65746
Klf11	4.67691	0.804414	0.171997	1.74644		6.65746
Rasl10a	4.67042	0.160459	0.0343566	1.11764		6.65746
Cox7a2l	4.66384	0.509112	0.109161	1.42317		6.65746
Fibin	4.66252	0.567217	0.121654	1.48166		6.65746
Ubald2	4.66178	1.07509	0.230617	2.10685		6.65746
St6galnac6	4.64624	0.364606	0.0784734	1.28753		6.65746
Pim1	4.64624	1.42973	0.307717	2.69396		6.65746
Zeb1	4.62818	0.540139	0.116707	1.45411		6.65746
Gm16845	4.62721	0.52304	0.113036	1.43698		6.65746
Atp8b2	4.62669	0.330739	0.0714849	1.25766		6.65746
Ltbp1	4.6266	0.58804	0.1271	1.5032		6.65746
AK079714	4.62422	0.992042	0.214532	1.989		6.65746
Prl3a1	4.62356	2.87245	0.621263	7.32306		6.65746
Gap43	4.60538	1.504	0.326575	2.83628		6.65746
Ccdc71l	4.59383	0.187428	0.0407998	1.13873		6.65746
AK140335	4.59049	0.0496762	0.0108215	1.03503		6.65746
Rpl23	4.58483	0.507333	0.110655	1.42142		6.65746
Dnajb13	4.56671	0.199788	0.0437487	1.14853		6.65746
1110038B12Rik	4.55861	0.405077	0.0888598	1.32416		6.65746
Plekhg2	4.55727	0.532281	0.116798	1.44621		6.65746
DQ685217	4.55591	0.342782	0.0752389	1.2682		6.65746
Trmt1	4.55467	0.210016	0.04611	1.1567		6.65746
Bckdk	4.5513	0.24184	0.0531365	1.1825		6.65746
Emp1	4.5445	0.53802	0.118389	1.45198		6.65746
Wnt9a	4.53846	0.611142	0.134658	1.52747		6.65746
Ndn	4.53202	0.465649	0.102746	1.38094		6.65746
Taf8	4.53039	0.415957	0.0918148	1.33418		6.65746
Rab12	4.52046	0.247299	0.0547066	1.18698		6.65746
Lrrk1	4.5193	0.36195	0.08009	1.28516		6.65746
Tef	4.51729	0.270069	0.0597856	1.20587		6.65746
Rpl5	4.51472	0.39859	0.0882867	1.31822		6.65746
Fau	4.51452	0.302017	0.0668991	1.23287		6.65746
Slc10a7	4.51253	0.226302	0.0501498	1.16983		6.65746
Pcdh18	4.51013	0.982918	0.217936	1.97646		6.65746
2010001A14Rik	4.50232	0.708355	0.157331	1.63394		6.65746
E130308A19Rik	4.50124	0.473341	0.105158	1.38832		6.65746
AK140221	4.50029	0.288274	0.0640567	1.22118		6.65746
Rps3	4.49587	0.364612	0.0810993	1.28754		6.65746
Klhl38	4.49073	0.667708	0.148686	1.58855		6.65746
Tmcc2	4.47741	0.517471	0.115574	1.43144		6.65746
Fblim1	4.47153	0.773038	0.17288	1.70886		6.65746
Oxa1l	4.46412	0.427796	0.0958298	1.34518		6.65746
Tom1l1	4.4617	0.232822	0.0521822	1.17513		6.65746
Ankrd50	4.45909	0.418173	0.0937797	1.33623		8.37886
Nrbp2	4.45345	1.01691	0.228343	2.02358		8.37886
Ss18l1	4.45097	0.249089	0.0559628	1.18846		8.37886
Hist3h2ba	4.44426	0.260971	0.058721	1.19829		8.37886
Rab11fip2	4.43967	0.635164	0.143066	1.55311		8.37886
Amer1	4.43081	0.442724	0.0999193	1.35917		8.37886
Papl	4.43046	0.154248	0.0348153	1.11284		8.37886
Rps12	4.42332	0.167548	0.0378784	1.12315		8.37886
4931406P16Rik	4.42319	0.418207	0.0945486	1.33627		8.37886
2610203C20Rik	4.41495	0.870944	0.197271	1.82886		8.37886
Chmp1b	4.41205	0.312583	0.0708476	1.24193		8.37886
Tpd52l2	4.40018	0.213919	0.048616	1.15983		8.37886
Foxp4	4.39861	0.224685	0.0510809	1.16852		8.37886
Tmem143	4.39594	0.213187	0.0484963	1.15925		8.37886
AK044348	4.39361	0.284722	0.0648037	1.21818		8.37886
Eif4a2	4.3911	0.489708	0.111523	1.40416		8.37886
Gm9776	4.3882	0.185569	0.0422881	1.13727		8.37886
9930014A18Rik	4.38696	0.32577	0.0742589	1.25333		8.37886
Mex3a	4.38605	0.504227	0.114962	1.41836		8.37886
Ptpra	4.38148	0.272662	0.0622306	1.20803		8.37886
Mtmr14	4.37884	0.424025	0.0968349	1.34167		8.37886
Egflam	4.37867	0.700901	0.160072	1.62552		8.37886
Numa1	4.37581	0.430824	0.0984557	1.348		8.37886
Vcam1	4.36764	0.541295	0.123933	1.45528		8.37886
Ak8	4.36253	0.246133	0.0564197	1.18602		8.37886
Tmem132e	4.36119	0.61784	0.141668	1.53458		8.37886
Fes	4.3562	0.213137	0.0489273	1.15921		8.37886
Zbtb10	4.35459	0.396652	0.0910882	1.31645		8.37886
Zfp579	4.35168	0.622734	0.143102	1.53979		8.37886
Tmem59	4.35112	0.437597	0.100571	1.35435		8.37886
Rps17	4.3446	0.292068	0.0672255	1.22439		8.37886
Gid4	4.328	0.345774	0.0798924	1.27083		8.37886
AK149307	4.32508	0.171835	0.03973	1.12649		8.37886
Rps5	4.31983	0.390282	0.0903468	1.31065		8.37886
AK166863	4.31854	0.371771	0.0860872	1.29394		8.37886
Zfp105	4.31815	0.391205	0.0905954	1.31149		8.37886
Smg6	4.31365	0.21828	0.0506021	1.16335		8.37886
Gramd1a	4.30884	0.314003	0.0728742	1.24315		8.37886
AK031897	4.30689	0.119531	0.0277536	1.08638		8.37886
Slit3	4.30589	0.422702	0.0981682	1.34044		8.37886
Tnfsf18	4.30522	1.09802	0.255044	2.14061		8.37886
Tgfbr1	4.30117	0.549931	0.127856	1.46402		8.37886
Igf1r	4.30117	0.557498	0.129615	1.47171		8.37886
0610011F06Rik	4.30011	0.766818	0.178325	1.70151		8.37886
2810408A11Rik	4.29965	0.479752	0.111579	1.3945		8.37886
Rpl41	4.29406	0.331602	0.0772234	1.25841		8.37886
Rps23	4.29215	0.354993	0.0827075	1.27898		8.37886
Tmem86b	4.2911	0.430907	0.100419	1.34808		8.37886
Kif3c	4.29073	0.410433	0.0956559	1.32909		8.37886
Filip1	4.28992	0.591256	0.137824	1.50656		8.37886
Atp5sl	4.28288	0.364416	0.0850868	1.28736		8.37886
AF365933	4.28221	0.146937	0.0343133	1.10722		8.37886
Jrkl	4.28181	0.274862	0.0641929	1.20988		8.37886
Atg13	4.27999	0.51831	0.121101	1.43228		8.37886
Rpl7	4.2748	0.396724	0.0928053	1.31652		8.37886
Tmub1	4.27468	0.40759	0.0953498	1.32647		8.37886
Eif3h	4.27025	0.366759	0.085887	1.28945		8.37886
AK040485	4.267	0.3606	0.0845092	1.28396		8.37886
Snx29	4.2629	0.393353	0.0922736	1.31344		8.37886
Abtb1	4.26232	0.758853	0.178038	1.69214		8.37886
AK187989	4.25932	0.320636	0.0752787	1.24888		8.37886
Peak1	4.2422	0.29868	0.0704068	1.23002		8.37886
Rab2b	4.23619	0.283696	0.0669695	1.21731		8.37886
Ptpn9	4.23558	0.341619	0.0806547	1.26718		8.37886
Rpl13	4.22384	0.416086	0.0985089	1.3343		8.37886
Per3	4.21583	0.561398	0.133164	1.4757		8.37886
Jup	4.16102	0.49024	0.117817	1.40468		8.37886
Stk33	4.15964	0.0379526	0.009124	1.02666		8.37886
Igip	4.15692	0.642292	0.154512	1.56081		8.37886
Lamb1	4.15388	0.276282	0.0665119	1.21107		8.37886
Ccnt2	4.15268	0.274332	0.0660615	1.20943		8.37886
Tgfb1	4.15169	0.657881	0.158461	1.57776		8.37886
Klhl17	4.14705	0.547657	0.132059	1.46171		8.37886
Rpl23a	4.14563	0.41203	0.0993892	1.33056		8.37886
Ccnj	4.14354	0.189288	0.0456826	1.1402		8.37886
Gm9958	4.1408	0.194759	0.047034	1.14453		8.37886
Ube2r2	4.13454	0.321684	0.0778042	1.24979		8.37886
Rnf165	4.13251	0.092716	0.0224358	1.06638		8.37886
Arid3a	4.13066	0.433512	0.10495	1.35052		8.37886
Ggn	4.1209	0.322208	0.0781888	1.25024		8.37886
Tmem220	4.11709	0.387424	0.0941014	1.30806		8.37886
Yipf2	4.11621	0.36183	0.0879037	1.28505		8.37886
Rora	4.11544	0.443717	0.107818	1.3601		8.37886
Zbed5	4.11193	0.47694	0.115989	1.39179		8.37886
Fam3c	4.11191	0.415909	0.101147	1.33414		8.37886
Wdtc1	4.10673	0.362994	0.08839	1.28609		8.37886
Mmp16	4.0893	0.526347	0.128713	1.44028		8.37886
Prr5	4.08786	0.41318	0.101075	1.33162		8.37886
Fam174a	4.08704	0.361719	0.0885039	1.28496		8.37886
Flot1	4.08483	0.511378	0.125189	1.42541		8.37886
Btbd2	4.08316	0.641997	0.157231	1.56049		8.37886
Eif4b	4.07963	0.467968	0.114708	1.38316		8.37886
AK083547	4.07765	0.207607	0.0509134	1.15477		8.37886
Arid5b	4.07004	0.745643	0.183203	1.67672		8.37886
Faxc	4.06693	0.230954	0.0567883	1.17361		8.37886
Smarcd3	4.05887	0.54909	0.135281	1.46316		8.37886
Fam84a	4.05745	0.295981	0.0729477	1.22772		8.37886
Pabpc4	4.05698	0.521492	0.128542	1.43544		8.37886
Gm5148	4.04941	0.461313	0.113921	1.37679		8.37886
Nhs	4.04516	0.327961	0.081075	1.25524		8.37886
Ppp4r1l-ps	4.04142	0.40064	0.0991335	1.32009		8.37886
Pnpla2	4.03689	0.388929	0.0963436	1.30942		8.37886
Paip2	4.02981	0.226578	0.0562254	1.17006		8.37886
AK164749	4.02885	0.0997414	0.0247568	1.07158		8.37886
Eif3f	4.02369	0.519277	0.129055	1.43324		8.37886
Rpl9	4.02303	0.374408	0.0930662	1.29631		8.37886
Clip3	4.01858	0.63475	0.157954	1.55267		8.37886
