# Supplementary material for: Tsc2 disruption in mesenchymal progenitors results in tumors with vascular anomalies overexpressing Lgals3
Source: eLife. 2017 Jul 11;6:e23202. doi: 10.7554/eLife.23202 (PMC5505700; doi:10.7554/eLife.23202)
Supplement: Figure 4—source data 2. — Gene expression changes in KO fibroblasts treated with sirolimus or vehicle. DOI: http://dx.doi.org/10.7554/eLife.23202.024 [file elife-23202-fig4-data2.xls]

## Sheet: Sheet1
Sirolimus-treated KO fibroblasts (FDR<10%)
Red overexpressed in Sirolimus KO vs Vehicle KO Fibroblasts, Blue Overexpressed in Vehicle KO vs Sirolimus-treated KO
Gene ID	Score(d)	Numerator(r)	Denominator(s+s0)	Fold Change	Fold Change (Treated / Vehicle)	q-value(%)
Tcp11l2	-24.6779	-2.0312	0.0823081	0.244652	4.08744	0
Sun2	-23.7187	-1.26144	0.0531832	0.417129	2.39734	0
Pim1	-20.9265	-2.2689	0.108422	0.207488	4.81956	2.57327
Snhg12	-19.9167	-1.03961	0.0521978	0.48646	2.05567	2.57327
Bckdha	-19.1268	-1.42688	0.0746008	0.371935	2.68864	2.57327
1500012F01Rik	-18.4847	-1.77325	0.0959311	0.292548	3.41824	2.57327
Mamdc2	-18.346	-0.999724	0.0544929	0.500096	1.99962	2.57327
Tgfb1	-17.862	-1.44731	0.0810269	0.366706	2.72698	2.57327
Rpl10a	-17.8566	-0.874002	0.0489457	0.545631	1.83274	2.57327
Lrrn2	-17.6319	-1.00768	0.0571512	0.497344	2.01068	2.57327
Inpp5k	-17.2381	-1.1482	0.0666084	0.451186	2.21638	2.57327
Kxd1	-16.8013	-1.2336	0.0734229	0.425255	2.35153	2.57327
Klhl24	-16.7954	-1.63726	0.0974828	0.321466	3.11074	2.57327
Ccpg1	-15.9177	-1.16774	0.0733614	0.445117	2.2466	2.57327
Cox7a2l	-15.8703	-0.847526	0.0534033	0.555737	1.79941	2.57327
Rpl3	-15.7619	-0.796825	0.0505538	0.575615	1.73727	2.57327
Pfdn5	-15.5397	-0.862492	0.0555027	0.550002	1.81818	2.57327
Rpl7a	-15.418	-0.692853	0.0449379	0.618629	1.61648	2.57327
Gabbr1	-15.4173	-0.679104	0.0440482	0.624553	1.60114	2.57327
AK009067	-15.3962	-1.28662	0.0835674	0.40991	2.43956	2.57327
Cacnb3	-15.1746	-0.992218	0.0653867	0.502704	1.98924	2.57327
Ifitm10	-14.8608	-1.10618	0.074436	0.464522	2.15275	2.57327
Tmem176b	-14.5723	-0.663161	0.0455082	0.631493	1.58355	2.57327
Fgf9	-14.2211	-0.971956	0.0683459	0.509814	1.9615	2.57327
Dpysl3	-13.8599	-0.718422	0.0518344	0.607762	1.64538	2.57327
Gltscr2	-13.8466	-1.12229	0.081052	0.459363	2.17693	2.57327
Epb4.1l4a	-13.6845	-0.943279	0.0689304	0.52005	1.92289	2.57327
Ctsf	-13.622	-0.946343	0.0694715	0.518946	1.92698	2.57327
Tspan4	-13.2763	-1.07096	0.0806674	0.476002	2.10083	2.57327
Rpl11	-13.0069	-0.650928	0.0500448	0.636871	1.57018	2.57327
Wdr45	-12.9985	-1.39708	0.10748	0.379698	2.63367	2.57327
Rpl28	-12.964	-0.584209	0.0450641	0.667015	1.49922	2.57327
Eif3f	-12.8897	-1.05872	0.082137	0.480057	2.08309	2.57327
Csrp2	-12.7616	-1.50908	0.118252	0.351335	2.84629	2.57327
Irgm1	-12.3946	-1.1052	0.089168	0.464838	2.15129	2.57327
Rpl24	-12.3919	-0.803295	0.0648242	0.573039	1.74508	2.57327
Rpl9	-12.3715	-0.6649	0.0537445	0.630732	1.58546	2.57327
Rps6	-12.3054	-0.668036	0.054288	0.629363	1.58891	2.57327
Gjb2	-12.2608	-2.9435	0.240075	0.129992	7.69278	2.57327
Rgcc	-12.1975	-1.79458	0.147127	0.288255	3.46916	2.57327
Wnt9a	-12.1679	-0.652685	0.05364	0.636095	1.57209	2.57327
Pold4	-12.1437	-0.811127	0.0667941	0.569937	1.75458	2.57327
Col8a2	-12.0675	-1.34372	0.111351	0.394003	2.53805	2.57327
Spop	-11.9373	-0.716751	0.0600429	0.608466	1.64348	2.57327
Rps8	-11.9136	-0.583007	0.0489363	0.667571	1.49797	2.57327
Filip1	-11.9103	-1.12355	0.0943344	0.458962	2.17883	2.57327
Rpl10	-11.91	-0.842279	0.0707201	0.557762	1.79288	2.57327
Fcgrt	-11.9053	-0.851427	0.0715167	0.554236	1.80428	2.57327
Leng9	-11.8823	-0.82874	0.0697455	0.563021	1.77613	2.57327
Rnf167	-11.8705	-1.16703	0.098314	0.445336	2.2455	2.57327
Eif3e	-11.8187	-0.727673	0.0615696	0.603877	1.65597	2.57327
Map1lc3a	-11.7826	-0.805994	0.0684055	0.571968	1.74835	2.57327
Rps4x	-11.7746	-0.662947	0.0563031	0.631587	1.58331	2.57327
Zfp580	-11.7037	-0.912418	0.0779594	0.531294	1.8822	2.57327
Gpx1	-11.6395	-0.828165	0.0711516	0.563245	1.77543	2.57327
Peg13	-11.6104	-1.34616	0.115944	0.393338	2.54234	2.57327
Abracl	-11.5969	-0.615301	0.0530573	0.652794	1.53188	2.57327
Rps27	-11.4971	-0.641329	0.0557818	0.641122	1.55977	2.57327
Unkl	-11.4501	-0.581787	0.0508107	0.668135	1.4967	2.57327
Rras	-11.4225	-1.07844	0.0944139	0.47354	2.11175	2.57327
Gnb2l1	-11.4127	-0.754273	0.0660906	0.592845	1.68678	2.57327
Fbxl20	-11.4027	-0.712912	0.0625213	0.610087	1.63911	2.57327
Eef1a1	-11.2621	-0.913868	0.0811455	0.53076	1.88409	2.57327
Npr3	-11.2535	-1.18309	0.105131	0.440408	2.27062	2.57327
Kdsr	-11.2413	-0.789562	0.0702375	0.57852	1.72855	2.57327
Rpl15	-11.1183	-0.641437	0.0576922	0.641074	1.55988	2.57327
Ulk2	-11.0985	-0.64393	0.0580194	0.639967	1.56258	2.57327
Tprgl	-11.0242	-0.585477	0.0531084	0.666429	1.50053	2.57327
Rpl4	-10.9608	-0.801775	0.0731494	0.573643	1.74324	2.57327
Hmga1	-10.8757	-1.10803	0.101881	0.463927	2.15551	2.57327
Rpl18a	-10.8677	-0.650824	0.0598859	0.636917	1.57006	2.57327
Rpl37a	-10.8496	-0.759467	0.0699993	0.590715	1.69286	2.57327
C1qtnf3	-10.838	-1.34498	0.124098	0.39366	2.54027	2.57327
Arxes1	-10.7935	-0.906622	0.0839969	0.533433	1.87465	2.57327
Rpl17	-10.7914	-0.807153	0.0747961	0.571509	1.74975	2.57327
Uqcrh	-10.7144	-0.665537	0.0621161	0.630454	1.58616	2.57327
Eef2	-10.7085	-1.4085	0.13153	0.376704	2.6546	2.57327
Eif3h	-10.667	-0.657654	0.0616534	0.633908	1.57752	2.57327
Angpt1	-10.6427	-0.88779	0.0834175	0.540441	1.85034	2.57327
Rps18	-10.6347	-0.642633	0.0604281	0.640543	1.56118	2.57327
Igbp1	-10.6146	-0.897664	0.0845686	0.536755	1.86305	2.57327
Sfxn3	-10.5618	-0.749397	0.0709537	0.594852	1.68109	2.57327
Ccni	-10.5324	-1.11463	0.105828	0.461811	2.16539	2.57327
Rps16	-10.5096	-0.599075	0.0570026	0.660177	1.51474	2.57327
Eif4b	-10.4831	-0.951624	0.0907769	0.51705	1.93405	2.57327
Adgrl1	-10.3778	-0.516089	0.0497303	0.699265	1.43007	2.57327
Tpm1	-10.3414	-1.08825	0.105232	0.470333	2.12616	2.57327
Kdm7a	-10.2984	-0.531988	0.0516575	0.691601	1.44592	2.57327
Csrp1	-10.2043	-1.35336	0.132626	0.391379	2.55507	2.57327
Rpl6	-10.0568	-0.714825	0.0710787	0.609279	1.64128	2.57327
Ggta1	-10.0246	-0.63587	0.0634313	0.643553	1.55387	2.57327
Arhgef25	-9.89758	-0.484189	0.0489199	0.714899	1.3988	2.57327
Abtb1	-9.85737	-1.34975	0.136928	0.39236	2.54868	2.57327
Calcoco1	-9.84952	-1.06661	0.10829	0.47744	2.0945	2.57327
4833412C05Rik	-9.81708	-1.11724	0.113806	0.460973	2.16932	2.57327
Zfp799	-9.81172	-0.644886	0.0657261	0.639543	1.56362	2.57327
Emp1	-9.7567	-0.515635	0.0528493	0.699485	1.42962	2.57327
Rpl5	-9.71911	-0.657421	0.0676421	0.634011	1.57726	2.57327
Lsp1	-9.6692	-0.944153	0.0976454	0.519735	1.92406	2.57327
Eif4a2	-9.54943	-0.800003	0.0837749	0.574348	1.7411	2.57327
Rpl12	-9.51761	-0.588859	0.0618705	0.664868	1.50406	2.57327
Atg13	-9.50998	-0.88978	0.0935628	0.539696	1.85289	2.57327
Rpl26	-9.43913	-0.479675	0.0508177	0.717139	1.39443	2.57327
Pcsk6	-9.4065	-0.553821	0.0588764	0.681213	1.46797	2.57327
Tspo	-9.40397	-0.435351	0.0462944	0.739514	1.35224	2.57327
Olfm2	-9.39613	-1.68293	0.179109	0.311449	3.2108	2.57327
Rps5	-9.34532	-0.583205	0.0624061	0.667479	1.49817	2.57327
Rps3a1	-9.21757	-0.588815	0.0638796	0.664889	1.50401	2.57327
Dbn1	-9.21249	-0.449546	0.0487974	0.732273	1.36561	2.57327
Tmem123	-9.20119	-0.541257	0.0588247	0.687172	1.45524	2.57327
Cxcl14	-9.20035	-4.00506	0.435316	0.0622811	16.0562	2.57327
Ttc33	-9.18535	-0.761265	0.0828782	0.589979	1.69498	2.57327
Bdnf	-9.14946	-0.854336	0.0933755	0.55312	1.80793	2.57327
Rps20	-9.14804	-0.552326	0.0603764	0.68192	1.46645	2.57327
Crbn	-9.13884	-0.667331	0.0730214	0.62967	1.58813	2.57327
Pabpc4	-9.09468	-0.679819	0.0747491	0.624243	1.60194	2.57327
Rps25	-9.08484	-0.631818	0.0695464	0.645363	1.54952	2.57327
Rpl23	-9.07911	-0.659581	0.0726483	0.633062	1.57962	2.57327
Pim3	-9.0202	-1.1724	0.129975	0.443681	2.25387	2.57327
Eif4e3	-9.00424	-0.694053	0.0770807	0.618115	1.61782	2.57327
Pde8b	-8.99786	-0.840259	0.0933843	0.558543	1.79037	2.57327
Ccng2	-8.98027	-1.09078	0.121465	0.469506	2.1299	2.57327
Zdhhc1	-8.95705	-0.775751	0.0866078	0.584085	1.71208	2.57327
Rpl29	-8.94229	-0.503556	0.0563117	0.705366	1.4177	2.57327
Rpl7	-8.93899	-0.575457	0.0643761	0.671074	1.49015	2.57327
Tcta	-8.89539	-0.921596	0.103604	0.527925	1.89421	2.57327
Prl3a1	-8.88298	-0.985471	0.110939	0.505061	1.97996	2.57327
Kazald1	-8.87524	-1.0341	0.116515	0.488321	2.04783	2.57327
Cdnf	-8.85953	-0.859295	0.0969911	0.551222	1.81415	2.57327
Fbxo32	-8.85733	-2.89528	0.32688	0.13441	7.4399	2.57327
Nudt6	-8.77009	-1.01392	0.115612	0.495198	2.0194	2.57327
Pink1	-8.76721	-1.04613	0.119323	0.484266	2.06498	2.57327
Rps7	-8.71645	-0.525904	0.0603346	0.694524	1.43984	2.57327
Supt4a	-8.7114	-0.833227	0.0956479	0.561272	1.78167	2.57327
Fgf2	-8.69838	-1.29161	0.148489	0.408495	2.44801	2.57327
Rps9	-8.69306	-0.521648	0.0600074	0.696576	1.43559	2.57327
Adamts10	-8.66934	-1.50934	0.174101	0.351273	2.84679	2.57327
Nub1	-8.65309	-0.68386	0.0790307	0.622497	1.60643	2.57327
Zfp316	-8.62185	-0.441896	0.0512531	0.736166	1.35839	2.57327
Ebf4	-8.60332	-0.414908	0.0482265	0.750067	1.33321	2.57327
Foxp1	-8.59666	-1.01425	0.117982	0.495085	2.01986	2.57327
Rps10	-8.55416	-0.58593	0.0684965	0.66622	1.50101	2.57327
Rpl32	-8.54328	-0.608866	0.0712684	0.655712	1.52506	2.57327
Camk2n1	-8.52982	-1.40943	0.165235	0.376461	2.65632	2.57327
Fgf18	-8.5297	-0.721013	0.0845297	0.606671	1.64834	2.57327
Rps15	-8.51703	-0.498375	0.0585151	0.707904	1.41262	2.57327
Cttnbp2nl	-8.49158	-0.815135	0.0959934	0.568355	1.75946	2.57327
Ltbp4	-8.49133	-0.718204	0.0845808	0.607854	1.64513	2.57327
Arhgef40	-8.48802	-0.878952	0.103552	0.543762	1.83904	2.57327
4930426L09Rik	-8.45719	-1.02626	0.121347	0.490982	2.03674	2.57327
Rpl21	-8.45062	-0.453329	0.0536445	0.730355	1.3692	2.57327
Crispld2	-8.42905	-1.8096	0.214687	0.285269	3.50546	2.57327
Fubp1	-8.42101	-0.705191	0.0837418	0.613361	1.63036	2.57327
Crebrf	-8.31586	-1.5095	0.181521	0.351233	2.84711	2.57327
Fau	-8.27437	-0.509374	0.0615604	0.702527	1.42343	2.57327
Rb1cc1	-8.27356	-0.530731	0.0641479	0.692204	1.44466	2.57327
Mbtps1	-8.24918	-0.506248	0.0613695	0.704051	1.42035	2.57327
Iglon5	-8.24383	-1.10188	0.133661	0.46591	2.14634	2.57327
Cnn2	-8.23384	-0.900747	0.109396	0.535609	1.86703	2.57327
Rpl37	-8.22102	-0.754166	0.0917363	0.592889	1.68666	2.57327
9930111J21Rik1	-8.21119	-1.24703	0.151869	0.421315	2.37352	2.57327
Skil	-8.18275	-0.685883	0.0838206	0.621625	1.60869	2.57327
Zkscan14	-8.18078	-0.684804	0.0837089	0.62209	1.60748	2.57327
Rps14	-8.17415	-0.56725	0.0693957	0.674902	1.4817	2.57327
Ccbe1	-8.16536	-0.475931	0.0582866	0.719003	1.39082	2.57327
Frat2	-8.14313	-1.06542	0.130836	0.477834	2.09278	2.57327
Nap1l1	-8.13677	-0.543652	0.0668142	0.686032	1.45766	2.57327
Rpl13a	-8.12643	-0.474895	0.0584383	0.719519	1.38982	2.57327
Gpbp1l1	-8.09506	-0.588106	0.07265	0.665216	1.50327	2.57327
Lmbr1l	-8.08872	-1.23097	0.152184	0.42603	2.34725	2.57327
Tgfbr1	-8.08293	-0.802496	0.0992828	0.573356	1.74412	2.57327
Rps3	-8.04284	-0.41783	0.0519506	0.74855	1.33592	2.57327
Heca	-8.0329	-0.81495	0.101452	0.568428	1.75924	2.57327
Prdm6	-8.02174	-0.620561	0.0773599	0.650418	1.53747	2.57327
Irs2	-8.01697	-1.35049	0.168453	0.39216	2.54998	2.57327
Relb	-8.01024	-0.43135	0.0538498	0.741568	1.34849	2.57327
2610002J02Rik	-7.99949	-0.500831	0.0626079	0.706699	1.41503	2.57327
Serinc3	-7.96493	-0.622358	0.0781373	0.649608	1.53939	2.57327
Dak	-7.94284	-0.779057	0.098083	0.582747	1.71601	2.57327
Fxyd6	-7.90923	-1.16227	0.146951	0.446809	2.23809	2.57327
Numa1	-7.89994	-0.434785	0.0550364	0.739804	1.35171	2.57327
Marf1	-7.89819	-0.355235	0.0449768	0.781742	1.27919	2.57327
Ttc12	-7.85048	-0.696939	0.0887765	0.61688	1.62106	2.57327
Rpl19	-7.84258	-0.369763	0.0471481	0.77391	1.29214	2.57327
Rpl27a	-7.83798	-0.544224	0.0694342	0.68576	1.45824	2.57327
Bgn	-7.83006	-0.852442	0.108868	0.553847	1.80555	2.57327
Rpl23a	-7.8146	-0.431163	0.055174	0.741664	1.34832	2.57327
Crebl2	-7.79769	-0.564693	0.072418	0.676099	1.47907	2.57327
Zeb1	-7.79136	-0.562129	0.0721477	0.677302	1.47645	2.57327
Tmem200a	-7.77876	-1.67194	0.214937	0.313831	3.18643	2.57327
Sema4c	-7.73224	-0.421977	0.0545737	0.746401	1.33976	2.57327
2410006H16Rik	-7.72979	-1.15911	0.149954	0.447789	2.2332	2.57327
Pabpc1	-7.72179	-0.681423	0.0882468	0.62355	1.60372	2.57327
Ypel1	-7.68779	-0.750982	0.097685	0.594199	1.68294	2.57327
Tpm2	-7.68223	-0.942151	0.12264	0.520456	1.92139	2.57327
Btbd2	-7.67921	-0.611903	0.079683	0.654333	1.52827	2.57327
Ubl3	-7.66257	-0.400373	0.0522505	0.757662	1.31985	2.57327
2810013P06Rik	-7.63522	-0.581818	0.0762018	0.668121	1.49673	2.57327
Mtus1	-7.61698	-1.29639	0.170198	0.407143	2.45614	2.57327
Rpl14	-7.59606	-0.569946	0.0750318	0.673642	1.48447	2.57327
Maff	-7.5838	-1.80931	0.238576	0.285327	3.50475	2.57327
AY089789	-7.5816	-0.837616	0.11048	0.559567	1.78709	2.57327
Megf10	-7.57039	-1.19877	0.15835	0.435647	2.29544	2.57327
Ext1	-7.56181	-1.284	0.169801	0.410655	2.43513	2.57327
Rpl13	-7.55125	-0.571479	0.07568	0.672927	1.48605	2.57327
Zfp524	-7.50783	-0.754058	0.100436	0.592933	1.68653	2.57327
BC034090	-7.50275	-0.398942	0.0531728	0.758414	1.31854	2.57327
Tmem50a	-7.49443	-0.475698	0.0634736	0.719119	1.39059	2.57327
Hspb11	-7.48033	-0.881984	0.117907	0.542621	1.84291	2.57327
Dapk3	-7.47833	-0.586284	0.0783977	0.666057	1.50137	2.57327
Rps27a	-7.47304	-0.415127	0.0555499	0.749954	1.33342	2.57327
Schip1	-7.46493	-0.910277	0.121941	0.532083	1.87941	2.57327
Ica1l	-7.46342	-0.807605	0.108208	0.57133	1.7503	2.57327
Ltbp2	-7.44814	-1.83106	0.245841	0.281058	3.55798	2.57327
Adcy4	-7.43317	-0.666448	0.0896586	0.630056	1.58716	2.57327
Pdha1	-7.42174	-0.353211	0.0475914	0.78284	1.2774	2.57327
Mycl	-7.40418	-1.49807	0.202327	0.354027	2.82464	2.57327
Kalrn	-7.40083	-0.448703	0.0606288	0.732701	1.36481	2.57327
Lrrc61	-7.39465	-0.938155	0.126869	0.5219	1.91608	2.57327
Npm1	-7.3945	-0.488163	0.0660171	0.712932	1.40266	2.57327
Mrpl24	-7.39218	-0.7006	0.0947758	0.615316	1.62518	2.57327
Csdc2	-7.38325	-1.30994	0.177421	0.403337	2.47932	2.57327
Rps15a-ps6	-7.37507	-0.608225	0.0824704	0.656003	1.52438	2.57327
Sgms2	-7.36385	-0.833304	0.113161	0.561242	1.78176	2.57327
AK188772	-7.36196	-1.05646	0.143502	0.480812	2.07982	2.57327
Anxa8	-7.35321	-1.3174	0.17916	0.401257	2.49217	2.57327
Tgif1	-7.3523	-0.792063	0.10773	0.577518	1.73155	2.57327
Bmp4	-7.35138	-0.73011	0.0993159	0.602858	1.65877	2.57327
Kif5c	-7.34814	-0.603033	0.0820661	0.658368	1.51891	2.57327
Zer1	-7.34806	-0.455512	0.0619908	0.729251	1.37127	2.57327
BC040690	-7.31591	-0.624768	0.0853985	0.648524	1.54196	2.57327
Paqr4	-7.3111	-0.738652	0.101032	0.599299	1.66862	2.57327
Wdr34	-7.30437	-0.561074	0.0768134	0.677797	1.47537	2.57327
St6galnac2	-7.28491	-0.711935	0.0977274	0.610501	1.638	2.57327
Tagln	-7.28055	-1.80586	0.24804	0.28601	3.49638	2.57327
Wdtc1	-7.25561	-0.348654	0.048053	0.785316	1.27337	2.57327
Gigyf1	-7.24381	-0.670905	0.0926177	0.628112	1.59207	2.57327
Plp2	-7.22731	-0.417152	0.0577189	0.748902	1.33529	2.57327
Ndufs2	-7.22708	-0.499087	0.069058	0.707554	1.41332	2.57327
Ctla2a	-7.18975	-1.68184	0.233922	0.311684	3.20837	2.57327
Cdk10	-7.18499	-0.317688	0.0442155	0.802355	1.24633	2.57327
Use1	-7.18202	-0.818531	0.113969	0.567019	1.76361	2.57327
1110038B12Rik	-7.17452	-0.585777	0.0816468	0.666291	1.50085	2.57327
Plcb4	-7.1735	-0.673007	0.0938185	0.627198	1.59439	2.57327
Lats2	-7.17278	-1.12571	0.156942	0.458276	2.18209	2.57327
Chmp1b	-7.17018	-0.762017	0.106276	0.589671	1.69586	2.57327
Fam118a	-7.16162	-0.467762	0.0653152	0.723085	1.38296	2.57327
Rpl36a	-7.1228	-0.606383	0.0851327	0.656841	1.52244	2.57327
Rapgef3	-7.09027	-0.795426	0.112186	0.576173	1.73559	2.57327
Zbtb10	-7.08573	-0.574828	0.0811248	0.671366	1.4895	2.57327
Kctd2	-7.06352	-0.614276	0.0869646	0.653258	1.53079	2.57327
E530011L22Rik	-7.05213	-0.629689	0.0892906	0.646316	1.54723	2.57327
Tmem134	-7.00368	-0.457028	0.0652553	0.728486	1.37271	2.57327
Eva1b	-7.00348	-0.821451	0.117292	0.565872	1.76718	2.57327
Sfrp1	-6.99895	-0.638005	0.0911572	0.642601	1.55618	2.57327
Ntn4	-6.99729	-1.56898	0.224226	0.337048	2.96694	2.57327
Exosc5	-6.99366	-0.771588	0.110327	0.585772	1.70715	2.57327
C78339	-6.98441	-0.340595	0.048765	0.789716	1.26628	2.57327
Pdk2	-6.96508	-0.482413	0.0692616	0.71578	1.39708	2.57327
F2r	-6.95392	-0.764963	0.110004	0.588469	1.69933	2.57327
Rora	-6.94851	-0.914905	0.131669	0.530379	1.88544	2.57327
Tbc1d15	-6.94626	-0.522538	0.0752258	0.696146	1.43648	2.57327
Apol9b	-6.93788	-0.610046	0.0879298	0.655176	1.52631	2.57327
Socs2	-6.9212	-1.23685	0.178705	0.424297	2.35684	2.57327
Phlpp1	-6.88197	-0.339695	0.0493601	0.790208	1.26549	2.57327
Lrrk1	-6.87227	-0.560361	0.0815394	0.678133	1.47464	2.57327
Tmco6	-6.87202	-0.832791	0.121186	0.561442	1.78113	2.57327
Ap4m1	-6.867	-0.414534	0.0603661	0.750262	1.33287	2.57327
Mnt	-6.85886	-0.575332	0.0838816	0.671132	1.49002	2.57327
Pigl	-6.84505	-0.521406	0.0761728	0.696692	1.43535	2.57327
Tmsb4x	-6.84504	-0.719576	0.105124	0.607276	1.6467	2.57327
Tmeff1	-6.79919	-0.552459	0.0812536	0.681857	1.46658	2.57327
Crlf1	-6.78328	-1.94917	0.28735	0.258965	3.86153	2.57327
9930111J21Rik2	-6.77261	-1.15953	0.171209	0.447658	2.23385	2.57327
Rps26	-6.7717	-0.668322	0.0986935	0.629238	1.58922	2.57327
C430002N11Rik	-6.76249	-1.60499	0.237338	0.328737	3.04195	2.57327
Wipi1	-6.73126	-0.519698	0.0772067	0.697518	1.43366	2.57327
Rasa1	-6.73014	-0.371154	0.055148	0.773164	1.29339	2.57327
Fam101b	-6.71159	-0.824588	0.12286	0.564644	1.77103	2.57327
Pcdh18	-6.70968	-0.766657	0.114261	0.587778	1.70132	2.57327
Prkg2	-6.69589	-1.17409	0.175345	0.443162	2.25651	2.57327
Rpl36	-6.67268	-0.715651	0.107251	0.60893	1.64222	2.57327
Rps23	-6.66933	-0.473343	0.0709732	0.720293	1.38832	2.57327
Rabac1	-6.66298	-0.552831	0.0829706	0.681681	1.46696	2.57327
Acta1	-6.66282	-1.21724	0.182692	0.430103	2.32502	2.57327
Hbp1	-6.65989	-0.941347	0.141346	0.520747	1.92032	2.57327
Gm16845	-6.64472	-0.792341	0.119244	0.577406	1.73188	2.57327
Ctgf	-6.64328	-2.16161	0.325383	0.223507	4.47413	2.57327
Thsd1	-6.62758	-0.509555	0.0768839	0.702439	1.42361	2.57327
Ambra1	-6.625	-0.298149	0.0450036	0.813295	1.22957	2.57327
Zc3h6	-6.61864	-0.521677	0.0788194	0.696561	1.43562	2.57327
Nbl1	-6.61469	-0.521694	0.078869	0.696553	1.43564	2.57327
Gm14436	-6.60725	-0.385167	0.0582947	0.76569	1.30601	2.57327
Scel	-6.58257	-0.749376	0.113842	0.594861	1.68107	2.57327
Rpl34	-6.53761	-0.529673	0.0810194	0.692712	1.4436	2.57327
Eif3k	-6.53591	-0.453618	0.069404	0.730209	1.36947	2.57327
1810032O08Rik	-6.52988	-0.871924	0.133528	0.546418	1.8301	2.57327
Hsd3b7	-6.52701	-0.464202	0.0711201	0.724872	1.37955	2.57327
Fblim1	-6.49648	-0.913754	0.140654	0.530802	1.88394	2.57327
Spg20	-6.49323	-0.590693	0.0909705	0.664024	1.50597	2.57327
Erc2	-6.48978	-0.39403	0.0607154	0.761001	1.31406	2.57327
Nsa2	-6.48837	-0.534654	0.0824018	0.690324	1.44859	2.57327
Bcl2l11	-6.44207	-0.620464	0.0963145	0.650461	1.53737	2.57327
Cebpd	-6.43762	-0.861704	0.133854	0.550302	1.81718	2.57327
Ctxn1	-6.42203	-0.986464	0.153606	0.504713	1.98132	2.57327
Arhgef28	-6.41836	-0.882962	0.137568	0.542253	1.84416	2.57327
Gdpd5	-6.40989	-0.630677	0.0983913	0.645873	1.54829	2.57327
Klhl38	-6.40892	-1.37075	0.213882	0.386689	2.58606	2.57327
R3hdm2	-6.40047	-0.514905	0.0804481	0.699839	1.4289	2.57327
Secisbp2l	-6.37922	-0.476143	0.0746396	0.718897	1.39102	2.57327
Rplp1	-6.37707	-0.307766	0.0482614	0.807892	1.23779	2.57327
Hdac5	-6.37573	-0.466543	0.0731747	0.723697	1.38179	2.57327
Gabarapl2	-6.35418	-0.438727	0.0690454	0.737785	1.35541	2.57327
Itga9	-6.35341	-0.523358	0.0823744	0.69575	1.4373	2.57327
Stard6	-6.34753	-0.459323	0.0723625	0.727327	1.3749	2.57327
AK145301	-6.34662	-1.60136	0.252317	0.329566	3.0343	2.57327
Mustn1	-6.33929	-1.62264	0.255965	0.324741	3.07938	2.57327
Tnk2	-6.33315	-0.718178	0.1134	0.607865	1.6451	2.57327
Syf2	-6.33243	-0.599714	0.0947052	0.659885	1.51542	2.57327
Igf2	-6.3282	-0.762772	0.120535	0.589363	1.69675	2.57327
Col27a1	-6.3262	-0.799482	0.126376	0.574555	1.74048	2.57327
Rps17	-6.32529	-0.473339	0.0748328	0.720295	1.38832	2.57327
Rictor	-6.31402	-0.582382	0.0922364	0.66786	1.49732	2.57327
Hoxa11os	-6.30846	-0.525515	0.0833032	0.694711	1.43945	2.57327
Ifi47	-6.29538	-1.22026	0.193834	0.429206	2.32989	2.57327
Zfp568	-6.29415	-0.567657	0.0901882	0.674711	1.48212	2.57327
Iah1	-6.291	-0.472103	0.0750442	0.720913	1.38713	2.57327
Acrbp	-6.28584	-0.501949	0.0798538	0.706152	1.41612	2.57327
Myl12a	-6.28565	-0.577602	0.0918923	0.670076	1.49237	2.57327
Rpl22	-6.28089	-0.567339	0.0903279	0.67486	1.48179	2.57327
Pbx2	-6.26387	-0.317855	0.0507442	0.802262	1.24648	2.57327
Rffl	-6.25712	-0.453788	0.0725234	0.730124	1.36963	2.57327
Nfkb2	-6.24955	-0.615844	0.0985421	0.652548	1.53245	2.57327
AB904934	-6.23572	-1.16377	0.186629	0.446346	2.24042	2.57327
Cald1	-6.2312	-0.890633	0.142931	0.539377	1.85399	2.57327
Gdi1	-6.22211	-0.698807	0.11231	0.616082	1.62316	2.57327
Adamts6	-6.22204	-1.35192	0.21728	0.391769	2.55252	2.57327
Rplp0	-6.22171	-0.404168	0.064961	0.755672	1.32333	2.57327
Trim68	-6.21815	-0.515383	0.0828837	0.699607	1.42937	2.57327
Asnsd1	-6.21656	-0.630064	0.101352	0.646148	1.54763	2.57327
Spry2	-6.20536	-0.60304	0.0971805	0.658365	1.51891	2.57327
Eif3m	-6.19815	-0.430353	0.0694324	0.74208	1.34756	2.57327
Wnt5a	-6.19419	-0.925156	0.149358	0.526624	1.89889	2.57327
9930014A18Rik	-6.18823	-0.534883	0.0864356	0.690214	1.44883	2.57327
Zswim4	-6.18748	-1.43579	0.232048	0.369644	2.70531	2.57327
Letm2	-6.18373	-0.704279	0.113892	0.613749	1.62933	2.57327
Rai14	-6.17802	-0.626061	0.101337	0.647943	1.54334	2.57327
Cx3cl1	-6.15773	-0.790591	0.12839	0.578107	1.72978	2.57327
Fam103a1	-6.15335	-0.412123	0.0669754	0.751517	1.33064	2.57327
Rps28	-6.1528	-0.348435	0.0566302	0.785436	1.27318	2.57327
Ghr	-6.1421	-1.26502	0.205959	0.416093	2.40331	2.57327
Foxo1	-6.13995	-1.16141	0.189156	0.447076	2.23676	2.57327
Etv4	-6.13861	-1.5089	0.245805	0.351379	2.84593	2.57327
Rps13	-6.13434	-0.401745	0.0654912	0.756942	1.3211	2.57327
Pcbp2	-6.12519	-0.48019	0.0783959	0.716883	1.39493	2.57327
Zfr2	-6.1181	-0.594508	0.097172	0.66227	1.50996	2.57327
Rusc2	-6.11628	-0.839072	0.137187	0.559003	1.7889	2.57327
Kif3c	-6.11324	-0.357297	0.0584464	0.780626	1.28102	2.57327
AK011877	-6.09393	-1.32205	0.216945	0.399966	2.50021	2.57327
Harbi1	-6.0926	-0.587848	0.0964855	0.665335	1.503	2.57327
Rhoj	-6.08792	-0.564238	0.0926816	0.676313	1.47861	2.57327
Rpl18	-6.08665	-0.471769	0.0775088	0.72108	1.38681	2.57327
Eogt	-6.08562	-0.573165	0.0941834	0.672141	1.48778	2.57327
AK003349	-6.08389	-0.449934	0.073955	0.732076	1.36598	2.57327
Eef1b2	-6.07602	-0.345156	0.0568063	0.787223	1.27029	2.57327
Rhoc	-6.06449	-0.477401	0.0787207	0.71827	1.39223	2.57327
Ercc1	-6.05985	-0.904067	0.14919	0.534378	1.87133	2.57327
Prkag2	-6.03171	-0.823096	0.136461	0.565228	1.7692	2.57327
Pou6f1	-6.01427	-0.293204	0.0487514	0.816088	1.22536	2.57327
Arxes2	-6.01351	-0.906856	0.150803	0.533346	1.87495	2.57327
Bmpr2	-6.01022	-0.744808	0.123923	0.596747	1.67575	2.57327
Mturn	-6.00057	-0.946887	0.1578	0.518751	1.92771	2.57327
Ubald1	-5.99274	-1.11993	0.186882	0.460115	2.17337	2.57327
Zfp113	-5.99253	-0.434232	0.0724622	0.740088	1.35119	2.57327
Cdkn2b	-5.96537	-0.964247	0.161641	0.512546	1.95105	2.57327
DQ685776	-5.963	-0.463594	0.0777452	0.725177	1.37897	2.57327
AK145129	-5.9526	-0.652475	0.109612	0.636188	1.57186	2.57327
Pmepa1	-5.95106	-0.893875	0.150204	0.538167	1.85816	2.57327
Tmem59	-5.9383	-0.54636	0.0920061	0.684745	1.4604	2.57327
Adgrg5	-5.92946	-0.347211	0.058557	0.786102	1.2721	2.57327
Tmem44	-5.9241	-0.564045	0.095212	0.676403	1.47841	2.57327
Tspyl3	-5.92007	-0.341674	0.0577145	0.789125	1.26723	2.57327
4931406P16Rik	-5.91757	-0.624866	0.105595	0.64848	1.54207	2.57327
Acsbg1	-5.91248	-0.839675	0.142017	0.558769	1.78965	2.57327
Mterf1b	-5.90858	-0.447301	0.0757036	0.733414	1.36349	2.57327
Cited2	-5.90569	-0.642574	0.108806	0.640569	1.56111	2.57327
Nacad	-5.90241	-0.491073	0.0831987	0.711496	1.40549	2.57327
Arid5b	-5.90239	-1.36507	0.231274	0.388217	2.57588	2.57327
2610008E11Rik	-5.89859	-0.702273	0.119058	0.614603	1.62707	2.57327
Ctnna1	-5.8903	-0.38137	0.0647454	0.767708	1.30258	2.57327
Fam126b	-5.87771	-0.847637	0.144212	0.555694	1.79955	2.57327
Rpl31	-5.87545	-0.436867	0.0743545	0.738737	1.35366	2.57327
Zkscan7	-5.8747	-0.615657	0.104798	0.652633	1.53226	2.57327
Stx5a	-5.8657	-0.293178	0.0499818	0.816102	1.22534	2.57327
Dlk1	-5.86244	-0.542131	0.0924753	0.686756	1.45612	2.57327
Islr	-5.84783	-0.822981	0.140733	0.565273	1.76906	2.57327
Lactb	-5.84572	-0.527552	0.0902457	0.693731	1.44148	2.57327
S100pbp	-5.84016	-0.315097	0.0539535	0.803797	1.2441	2.57327
Naca	-5.83729	-0.531526	0.091057	0.691823	1.44546	2.57327
Oxa1l	-5.82102	-0.695308	0.119448	0.617577	1.61923	2.57327
Jmy	-5.79059	-0.600588	0.103718	0.659485	1.51633	2.57327
AK180077	-5.78778	-0.896473	0.154891	0.537199	1.86151	2.57327
Adipor1	-5.76965	-0.574839	0.0996316	0.671361	1.48951	2.57327
Foxk1	-5.73855	-0.685358	0.119431	0.621852	1.6081	2.57327
Trpm4	-5.73822	-0.325793	0.0567759	0.79786	1.25335	2.57327
Thbs1	-5.73392	-0.929441	0.162095	0.525062	1.90454	2.57327
Rb1	-5.73176	-0.597126	0.104178	0.66107	1.5127	2.57327
Mcam	-5.72747	-1.69361	0.295699	0.309153	3.23465	2.57327
Nudt16	-5.69944	-0.534201	0.0937286	0.690541	1.44814	2.57327
Mterf4	-5.6989	-0.513229	0.0900577	0.700652	1.42724	2.57327
Gm5088	-5.68956	-0.563964	0.0991226	0.676441	1.47833	2.57327
Itgb5	-5.68588	-0.61947	0.108949	0.65091	1.53631	2.57327
Cacfd1	-5.68546	-0.644331	0.11333	0.639789	1.56301	2.57327
Otud1	-5.68465	-0.578026	0.101682	0.66988	1.4928	2.57327
Appbp2os	-5.68306	-0.448788	0.0789693	0.732658	1.36489	2.57327
Golim4	-5.68274	-0.82504	0.145183	0.564467	1.77158	2.57327
Tmem159	-5.67506	-0.697403	0.122889	0.616682	1.62158	2.57327
Tgtp1	-5.67165	-0.611673	0.107847	0.654437	1.52803	2.57327
Tcte2	-5.66522	-0.507852	0.0896439	0.703269	1.42193	2.57327
Tspan7	-5.66261	-0.370331	0.0653994	0.773605	1.29265	2.57327
Specc1	-5.66044	-0.430394	0.0760355	0.742059	1.3476	2.57327
Sept5	-5.64169	-0.4055	0.0718756	0.754975	1.32455	2.57327
2200002D01Rik	-5.63028	-1.27187	0.225898	0.414123	2.41474	2.57327
Tpm4	-5.62823	-0.672696	0.119522	0.627333	1.59405	2.57327
Mir143hg	-5.62568	-1.53138	0.272212	0.345947	2.89062	2.57327
Vkorc1	-5.61266	-0.611644	0.108976	0.654451	1.528	2.57327
Cyb561d1	-5.59839	-0.403656	0.0721022	0.75594	1.32286	2.57327
Rusc1	-5.59437	-0.355161	0.0634853	0.781783	1.27913	2.57327
Rps29	-5.59219	-0.454751	0.081319	0.729636	1.37055	2.57327
Slc2a13	-5.58925	-0.46637	0.0834405	0.723783	1.38163	2.57327
Las1l	-5.58759	-0.399212	0.0714462	0.758272	1.31879	2.57327
Ltbp3	-5.58096	-0.679337	0.121724	0.624452	1.6014	2.57327
Rab11fip2	-5.56816	-0.491816	0.0883265	0.71113	1.40621	2.57327
Akap12	-5.56703	-0.720227	0.129374	0.607002	1.64744	2.57327
Snhg7	-5.56383	-0.55086	0.0990074	0.682613	1.46496	2.57327
Sik1	-5.55787	-0.72361	0.130196	0.60558	1.65131	2.57327
Mpst	-5.55743	-0.415176	0.0747065	0.749928	1.33346	2.57327
Tmem59l	-5.54666	-0.642168	0.115776	0.640749	1.56067	2.57327
Tspan2	-5.54162	-1.45004	0.261664	0.36601	2.73216	2.57327
Carns1	-5.53691	-0.376621	0.06802	0.77024	1.2983	2.57327
Irf2bpl	-5.53617	-0.566206	0.102274	0.675391	1.48062	2.57327
Mn1	-5.53254	-0.583477	0.105463	0.667353	1.49846	2.57327
Gm5148	-5.52886	-0.468461	0.0847302	0.722735	1.38363	2.57327
Chst15	-5.52792	-0.718253	0.129932	0.607833	1.64519	2.57327
Rpl37rt	-5.52151	-0.937046	0.169708	0.522301	1.9146	2.57327
Rnaset2b	-5.50694	-0.325775	0.0591572	0.79787	1.25334	2.57327
Il34	-5.5068	-0.825389	0.149885	0.56433	1.77201	2.57327
Rpl27	-5.50175	-0.375899	0.0683235	0.770625	1.29765	2.57327
Igfbp7	-5.50169	-1.00581	0.182818	0.497991	2.00807	2.57327
Cnn1	-5.49474	-1.70975	0.311162	0.305712	3.27105	2.57327
Prickle3	-5.49208	-0.410637	0.0747689	0.752291	1.32927	2.57327
Syde2	-5.48944	-0.410631	0.0748038	0.752294	1.32927	2.57327
Tmcc3	-5.48315	-1.24066	0.226268	0.423178	2.36307	2.57327
Prkab2	-5.47673	-0.663672	0.12118	0.631269	1.58411	2.57327
Cir1	-5.4683	-0.76783	0.140415	0.5873	1.70271	2.57327
Tmem47	-5.4673	-0.761443	0.139272	0.589906	1.69519	2.57327
9130221H12Rik	-5.46113	-0.40534	0.0742228	0.755058	1.3244	2.57327
Crim1	-5.46089	-1.12891	0.206727	0.45726	2.18694	2.57327
F2rl1	-5.45632	-0.749869	0.137431	0.594658	1.68164	2.57327
Cbx7	-5.45379	-0.572883	0.105043	0.672272	1.48749	2.57327
Rpl8	-5.44801	-0.453181	0.0831829	0.73043	1.36906	2.57327
Pmaip1	-5.43035	-0.911243	0.167806	0.531727	1.88067	2.57327
Elk4	-5.42677	-0.307539	0.0566708	0.808019	1.23759	2.57327
Ptprz1	-5.41657	-0.449415	0.0829704	0.73234	1.36549	2.57327
Kat8	-5.41193	-0.488292	0.0902251	0.712869	1.40278	2.57327
Snx29	-5.40293	-0.324423	0.0600456	0.798618	1.25216	2.57327
Eef1g	-5.38415	-0.356193	0.0661558	0.781223	1.28004	2.57327
Myc	-5.37718	-1.06522	0.1981	0.477899	2.09249	2.57327
Gpr153	-5.3769	-0.69321	0.128924	0.618476	1.61688	2.57327
Arrdc2	-5.37678	-0.47601	0.0885307	0.718963	1.39089	2.57327
Rps15a	-5.37615	-0.459709	0.0855089	0.727133	1.37526	2.57327
Map4k3	-5.36989	-0.440803	0.082088	0.736724	1.35736	2.57327
Ankrd50	-5.36189	-0.489178	0.0912323	0.712431	1.40364	2.57327
Plekha5	-5.36044	-0.564277	0.105267	0.676294	1.47865	2.57327
Coro6	-5.35934	-0.618467	0.1154	0.651363	1.53524	2.57327
Iqgap1	-5.35706	-0.869173	0.162248	0.54746	1.82662	2.57327
Zkscan5	-5.35539	-0.390854	0.0729832	0.762678	1.31117	2.57327
Pdlim1	-5.34459	-0.538263	0.100712	0.6886	1.45222	2.57327
Cdkl3	-5.342	-0.35003	0.0655241	0.784568	1.27459	2.57327
Slc2a3	-5.34152	-0.827123	0.154848	0.563652	1.77414	2.57327
Smim19	-5.33873	-0.596076	0.111651	0.661551	1.5116	2.57327
Rgs16	-5.3369	-2.19144	0.410622	0.218932	4.56763	2.57327
Cyba	-5.33545	-0.228205	0.0427714	0.853697	1.17138	2.57327
Gpr137	-5.33429	-0.257591	0.0482896	0.836484	1.19548	2.57327
Ano1	-5.33234	-0.678375	0.127219	0.624869	1.60034	2.57327
Rplp2	-5.3305	-0.309057	0.057979	0.807169	1.2389	2.57327
Mgp	-5.32149	-0.903691	0.169819	0.534518	1.87085	2.57327
Zswim6	-5.31456	-0.785114	0.147729	0.580306	1.72323	2.57327
Ret	-5.30359	-0.656902	0.12386	0.634239	1.57669	2.57327
Zdhhc4	-5.29974	-0.33265	0.0627673	0.794076	1.25932	2.57327
Mgll	-5.29546	-1.44627	0.273115	0.366969	2.72502	2.57327
Cdkn2aip	-5.28943	-0.528061	0.0998334	0.693486	1.44199	2.57327
Foxs1	-5.28366	-1.29598	0.245282	0.407258	2.45544	2.57327
Car2	-5.27655	-1.07728	0.204164	0.473921	2.11005	2.57327
Kdm3b	-5.27386	-0.351017	0.0665579	0.784031	1.27546	2.57327
Ctdp1	-5.26637	-0.617939	0.117337	0.651601	1.53468	2.57327
Chd6	-5.263	-0.45926	0.087262	0.727359	1.37484	2.57327
Klhdc8a	-5.23929	-1.20041	0.229116	0.435152	2.29805	2.57327
Nbr1	-5.23498	-0.417098	0.0796752	0.748929	1.33524	2.57327
Lims2	-5.22905	-1.6591	0.317286	0.316636	3.1582	2.57327
Cirbp	-5.22631	-0.691607	0.132332	0.619164	1.61508	2.57327
Fuz	-5.2216	-0.682315	0.130672	0.623165	1.60471	2.57327
Nnat	-5.22087	-0.385484	0.0738352	0.765522	1.3063	2.57327
Stmn2	-5.21935	-1.79062	0.343074	0.289047	3.45964	2.57327
Bcas3	-5.21696	-0.500549	0.0959466	0.706838	1.41475	2.57327
Acot1	-5.21665	-0.423784	0.0812368	0.745467	1.34144	2.57327
Ilk	-5.21463	-0.416637	0.0798976	0.749169	1.33481	2.57327
Rnf123	-5.20475	-0.359161	0.0690064	0.779618	1.28268	2.57327
Pitpnc1	-5.19453	-0.56192	0.108176	0.6774	1.47623	2.57327
Dos	-5.19452	-0.388116	0.0747165	0.764127	1.30868	2.57327
Gas6	-5.18714	-0.829173	0.159852	0.562852	1.77667	2.57327
Jam2	-5.18663	-0.650839	0.125484	0.63691	1.57008	2.57327
Scx	-5.18428	-0.930965	0.179574	0.524507	1.90655	2.57327
Samd5	-5.18364	-0.657378	0.126818	0.63403	1.57721	2.57327
Nkiras2	-5.17545	-0.269034	0.0519826	0.829875	1.205	2.57327
Ubald2	-5.16433	-1.4508	0.280927	0.365819	2.73359	2.57327
Pard6b	-5.15957	-0.377639	0.073192	0.769696	1.29921	2.57327
Dstn	-5.15943	-0.580465	0.112506	0.668748	1.49533	2.57327
Dram1	-5.15579	-0.338706	0.0656942	0.79075	1.26462	2.57327
Fhl1	-5.15301	-1.53833	0.298531	0.344283	2.90459	2.57327
Dynlt3	-5.14688	-0.411069	0.0798676	0.752066	1.32967	2.57327
Bsdc1	-5.1467	-0.580598	0.11281	0.668687	1.49547	2.57327
Cdk19	-5.14473	-0.890084	0.173009	0.539583	1.85328	2.57327
Smim24	-5.14449	-0.809726	0.157397	0.57049	1.75288	2.57327
Cish	-5.14199	-0.615369	0.119675	0.652763	1.53195	2.57327
Tm4sf1	-5.13987	-1.0305	0.200492	0.48954	2.04274	2.57327
Hyi	-5.13915	-0.94382	0.183653	0.519855	1.92361	2.57327
Pitpnm1	-5.13826	-0.464582	0.0904162	0.724681	1.37992	2.57327
Fgf13	-5.12996	-0.552215	0.107645	0.681972	1.46634	2.57327
Nog	-5.12869	-0.983097	0.191686	0.505893	1.9767	2.57327
Myh9	-5.12794	-0.78655	0.153385	0.579729	1.72494	2.57327
Slc25a30	-5.12251	-0.365731	0.0713969	0.776075	1.28853	2.57327
Myl9	-5.12185	-1.21693	0.237595	0.430198	2.32451	2.57327
Flot1	-5.1216	-0.479263	0.0935769	0.717344	1.39403	2.57327
Cyr61	-5.11868	-1.49189	0.291459	0.355548	2.81256	2.57327
Ago4	-5.10893	-0.285674	0.0559166	0.820358	1.21898	2.57327
Yipf4	-5.10526	-0.612695	0.120013	0.653974	1.52911	2.57327
Mta1	-5.10306	-0.319282	0.0625667	0.801469	1.24771	2.57327
AK220016	-5.09866	-0.415501	0.0814921	0.749759	1.33376	2.57327
Prkg1	-5.09857	-0.800669	0.157038	0.574083	1.74191	2.57327
Fbxl3	-5.08732	-0.491094	0.0965331	0.711485	1.40551	2.57327
Xiap	-5.08533	-0.26218	0.0515562	0.833827	1.19929	2.57327
AK218226	-5.08411	-2.01992	0.3973	0.246572	4.0556	2.57327
Tmem176a	-5.08067	-0.831712	0.163701	0.561862	1.7798	2.57327
Wdr48	-5.07768	-0.441518	0.0869528	0.736359	1.35803	2.57327
Pik3ca	-5.07747	-0.438711	0.0864035	0.737793	1.35539	2.57327
Fkrp	-5.07632	-0.281486	0.0554508	0.822743	1.21545	2.57327
Sdc3	-5.06554	-0.619223	0.122242	0.651022	1.53605	2.57327
Cxxc5	-5.06092	-0.369532	0.0730168	0.774033	1.29193	2.57327
Msrb3	-5.05861	-0.476917	0.0942782	0.718512	1.39177	2.57327
Cdkn2a	-5.05722	-0.629966	0.124568	0.646192	1.54753	2.57327
Amotl2	-5.05428	-0.648147	0.128237	0.638099	1.56715	2.57327
Fsd1	-5.05177	-0.634675	0.125634	0.644086	1.55259	2.57327
Ak5	-5.05043	-0.583433	0.115521	0.667374	1.49841	2.57327
Rpl41	-5.04633	-0.380337	0.0753689	0.768258	1.30165	2.57327
8430429K09Rik	-5.04543	-0.342987	0.0679798	0.788407	1.26838	2.57327
Synpo	-5.04149	-0.44525	0.0883172	0.734457	1.36155	2.57327
Rps11	-5.0414	-0.563543	0.111783	0.676638	1.47789	2.57327
Gltscr1l	-5.04134	-0.575945	0.114244	0.670847	1.49065	2.57327
Rcn2	-5.03527	-0.509988	0.101283	0.702228	1.42404	2.57327
Foxf1	-5.03483	-0.316047	0.0627722	0.803268	1.24491	2.57327
Grk6	-5.03185	-0.314291	0.0624602	0.804246	1.2434	2.57327
Fst	-5.02681	-1.4699	0.292411	0.361008	2.77002	2.57327
Tk2	-5.02522	-0.370667	0.0737613	0.773425	1.29295	2.57327
Klf13	-5.01805	-1.17807	0.234767	0.441941	2.26274	2.57327
Fam84b	-5.01515	-1.23856	0.246965	0.423795	2.35963	2.57327
2310003H01Rik	-5.00949	-0.296033	0.0590944	0.814489	1.22776	2.57327
Qars	-5.00335	-0.463055	0.0925489	0.725449	1.37846	2.57327
Ston1	-5.00311	-0.682778	0.136471	0.622964	1.60523	2.57327
Mllt6	-5.00026	-0.594608	0.118915	0.662224	1.51006	2.57327
Zfp661	-4.99979	-0.419129	0.0838295	0.747876	1.33712	2.57327
2700060E02Rik	-4.99907	-0.565581	0.113137	0.675683	1.47998	2.57327
Pcmtd2	-4.9941	-0.614212	0.122987	0.653287	1.53072	2.57327
Cdh11	-4.98702	-0.716407	0.143654	0.608611	1.64309	2.57327
BC023483	-4.98125	-0.630598	0.126594	0.645909	1.54821	2.57327
Ifi27l2b	-4.98058	-0.73378	0.147328	0.601326	1.66299	2.57327
Smurf2	-4.97877	-0.414332	0.0832196	0.750367	1.33268	2.57327
Wnt11	-4.9748	-1.16564	0.234308	0.445768	2.24332	2.57327
Slc6a9	-4.97405	-0.487902	0.0980895	0.713061	1.4024	2.57327
Ccdc97	-4.97242	-0.270191	0.0543379	0.82921	1.20597	2.57327
Csnk1g2	-4.97125	-0.322562	0.0648856	0.799648	1.25055	2.57327
Sod3	-4.96921	-0.860905	0.173248	0.550607	1.81618	2.57327
Tslp	-4.96565	-2.08081	0.419041	0.236381	4.23045	2.57327
Rps19	-4.96477	-0.343238	0.0691347	0.78827	1.2686	2.57327
Klf11	-4.96315	-0.796818	0.160547	0.575617	1.73727	2.57327
Nr1d2	-4.96254	-0.679552	0.136936	0.624359	1.60164	2.57327
3000002C10Rik	-4.95681	-0.23957	0.0483316	0.846997	1.18064	2.57327
Serpina3g	-4.95607	-1.02784	0.20739	0.490444	2.03897	2.57327
Akt3	-4.95062	-0.918794	0.185592	0.528951	1.89053	2.57327
Podn	-4.94506	-0.749248	0.151514	0.594914	1.68092	2.57327
Sbk1	-4.94163	-0.763299	0.154463	0.589148	1.69737	2.57327
Sytl5	-4.93738	-1.29493	0.262271	0.407556	2.45365	2.57327
AK181950	-4.93607	-0.733636	0.148628	0.601387	1.66282	2.57327
Tep1	-4.93456	-0.313128	0.0634561	0.804895	1.2424	2.57327
Fggy	-4.92842	-0.27525	0.0558495	0.826307	1.2102	2.57327
Gypc	-4.92062	-0.563071	0.114431	0.67686	1.47741	2.57327
Fbxo6	-4.91712	-0.306283	0.0622891	0.808723	1.23652	2.57327
Extl3	-4.91368	-0.689071	0.140235	0.620253	1.61225	2.57327
Hunk	-4.91359	-0.458104	0.0932322	0.727942	1.37374	2.57327
Plekhn1	-4.90839	-0.822725	0.167616	0.565373	1.76874	2.57327
Cntf	-4.90791	-0.646033	0.131631	0.639035	1.56486	2.57327
Dusp5	-4.90391	-1.33932	0.273114	0.395206	2.53033	2.57327
Zfp644	-4.90364	-0.40405	0.0823979	0.755734	1.32322	2.57327
Adamts9	-4.90068	-0.449455	0.0917127	0.73232	1.36552	2.57327
Zfp658	-4.90038	-0.48413	0.0987945	0.714928	1.39874	2.57327
Itgb1	-4.89952	-0.786259	0.160477	0.579846	1.7246	2.57327
Nsmf	-4.89692	-0.538372	0.109941	0.688547	1.45233	2.57327
St6galnac6	-4.89542	-0.424559	0.0867259	0.745066	1.34216	2.57327
Asb7	-4.89214	-0.307314	0.0628179	0.808145	1.2374	2.57327
Klf6	-4.89025	-0.562547	0.115034	0.677106	1.47687	2.57327
Tsacc	-4.88795	-0.994284	0.203416	0.501985	1.99209	2.57327
Hivep1	-4.88538	-0.466963	0.0955837	0.723486	1.3822	2.57327
Zc3h12a	-4.88441	-0.711582	0.145684	0.61065	1.6376	2.57327
Tpra1	-4.88171	-0.616837	0.126357	0.652099	1.53351	2.57327
Mical1	-4.87913	-0.252964	0.0518461	0.839171	1.19165	2.57327
Pappa	-4.87872	-0.588386	0.120602	0.665087	1.50356	2.57327
Plekhm3	-4.87487	-0.378008	0.0775421	0.769499	1.29955	2.57327
Oxld1	-4.87418	-0.77921	0.159865	0.582686	1.71619	2.57327
Edn1	-4.87393	-0.910792	0.18687	0.531893	1.88008	2.57327
AK078316	-4.86583	-0.418469	0.0860015	0.748218	1.33651	2.57327
Fam173a	-4.85821	-0.570656	0.117462	0.673311	1.4852	2.57327
Gas5	-4.84871	-0.703778	0.145147	0.613962	1.62876	2.57327
Csad	-4.84579	-0.629452	0.129897	0.646422	1.54698	2.57327
Rpl35a	-4.83443	-0.386518	0.0799511	0.764974	1.30723	2.57327
AK015392	-4.8281	-0.409179	0.0847496	0.753052	1.32793	2.57327
Spsb1	-4.82112	-0.526985	0.109307	0.694004	1.44091	2.57327
Trp53i11	-4.81756	-0.482023	0.100055	0.715973	1.3967	2.57327
Fzd7	-4.81086	-0.426827	0.0887215	0.743896	1.34427	2.57327
1810041H14Rik	-4.81027	-0.328259	0.0682413	0.796497	1.2555	2.57327
Rtn2	-4.80809	-0.615006	0.127911	0.652927	1.53156	2.57327
Klc2	-4.80479	-0.451915	0.0940552	0.731072	1.36785	2.57327
Nicn1	-4.80409	-0.532096	0.110759	0.691549	1.44603	2.57327
Rab12	-4.80324	-0.326524	0.0679799	0.797456	1.25399	2.57327
Zscan2	-4.79712	-0.668632	0.139382	0.629103	1.58956	2.57327
Pnpla2	-4.79273	-0.469029	0.0978627	0.722451	1.38418	2.57327
Nrbp2	-4.7883	-0.422178	0.0881687	0.746297	1.33995	2.57327
Gnb4	-4.77894	-0.448123	0.0937705	0.732996	1.36426	2.57327
Triqk	-4.77627	-0.698461	0.146236	0.616229	1.62277	2.57327
Serhl	-4.77447	-0.601379	0.125957	0.659124	1.51717	2.57327
Clk1	-4.77173	-0.405552	0.0849906	0.754947	1.3246	2.57327
Dusp10	-4.76015	-0.744799	0.156466	0.596751	1.67574	2.57327
Has2	-4.75962	-0.693287	0.14566	0.618443	1.61696	2.57327
Meis3	-4.7575	-0.377474	0.0793429	0.769784	1.29907	2.57327
2410004N09Rik	-4.75192	-1.09612	0.23067	0.467771	2.1378	2.57327
Uba7	-4.74556	-1.48056	0.311988	0.35835	2.79057	2.57327
St6gal1	-4.74522	-0.787723	0.166004	0.579258	1.72635	2.57327
Tmem230	-4.74355	-0.401156	0.0845687	0.757251	1.32057	2.57327
Hck	-4.74315	-1.02063	0.215181	0.4929	2.02881	2.57327
Arsg	-4.73948	-0.255907	0.0539948	0.83746	1.19409	2.57327
Kank3	-4.73775	-0.400185	0.0844672	0.757761	1.31968	2.57327
Slc22a18	-4.73686	-0.398551	0.0841382	0.75862	1.31818	2.57327
Pdgfb	-4.73671	-1.47785	0.312	0.359023	2.78534	2.57327
Odf3l1	-4.73476	-0.405653	0.0856755	0.754894	1.32469	2.57327
Cetn4	-4.72994	-0.924651	0.195489	0.526808	1.89823	2.57327
Zdhhc17	-4.72916	-0.241691	0.0511065	0.845753	1.18238	2.57327
Anxa6	-4.72473	-0.30556	0.0646724	0.809128	1.2359	2.57327
Etv5	-4.72283	-0.281161	0.0595324	0.822929	1.21517	2.57327
Irf2	-4.71509	-0.451192	0.0956909	0.731438	1.36717	2.57327
4933439C10Rik	-4.70521	-0.524342	0.111439	0.695276	1.43828	2.57327
AK044348	-4.70269	-0.4905	0.104302	0.711778	1.40493	2.57327
Mprip	-4.69372	-0.470383	0.100215	0.721773	1.38548	2.57327
Uqcc3	-4.69148	-0.447387	0.0953616	0.73337	1.36357	2.57327
Map3k14	-4.68366	-1.0901	0.232745	0.46973	2.12888	2.57327
Pdk4	-4.6816	-0.418957	0.0894902	0.747965	1.33696	2.57327
Six5	-4.68107	-0.35737	0.0763436	0.780586	1.28109	2.57327
Aplp1	-4.67462	-0.493178	0.105501	0.710458	1.40754	2.57327
Atp5sl	-4.67417	-0.651594	0.139403	0.636576	1.5709	2.57327
Mbnl1	-4.66983	-0.46596	0.0997809	0.723989	1.38124	2.57327
Stat6	-4.66972	-0.422091	0.0903889	0.746342	1.33987	2.57327
Myl6	-4.66923	-0.507489	0.108688	0.703446	1.42157	2.57327
Wbscr27	-4.658	-1.05055	0.225536	0.482785	2.07131	2.57327
AK181808	-4.6565	-1.75089	0.37601	0.297118	3.36566	2.57327
Rhoa	-4.65302	-0.292815	0.0629302	0.816307	1.22503	2.57327
Birc2	-4.65119	-0.590771	0.127015	0.663988	1.50605	2.57327
Slc16a13	-4.64893	-0.229278	0.0493185	0.853062	1.17225	2.57327
Atg14	-4.64627	-0.501648	0.107968	0.7063	1.41583	2.57327
4833418N02Rik	-4.64119	-0.495292	0.106717	0.709418	1.40961	2.57327
Apbb1	-4.62797	-0.48299	0.104363	0.715493	1.39764	2.57327
Irs1	-4.62744	-0.648905	0.14023	0.637764	1.56798	2.57327
Igip	-4.62622	-0.553257	0.119592	0.68148	1.46739	2.57327
Tdrkh	-4.62417	-0.708188	0.153149	0.612089	1.63375	2.57327
Mettl20	-4.62121	-0.605967	0.131127	0.657031	1.522	2.57327
AB335951	-4.61734	-0.487488	0.105578	0.713266	1.402	2.57327
Rps21	-4.61721	-0.425357	0.0921241	0.744655	1.3429	2.57327
Zkscan17	-4.60222	-0.540621	0.11747	0.687475	1.4546	2.57327
Junb	-4.59949	-1.0707	0.232786	0.476089	2.10045	2.57327
Antxr1	-4.59425	-0.478885	0.104236	0.717532	1.39367	2.57327
Serinc1	-4.59164	-0.208431	0.0453936	0.865478	1.15543	2.57327
Bcl2	-4.59153	-0.739991	0.161164	0.598743	1.67017	2.57327
Slc35e3	-4.5834	-0.209497	0.0457077	0.864839	1.15628	2.57327
Otud5	-4.5828	-0.410245	0.0895184	0.752496	1.32891	2.57327
Vsig10l	-4.57489	-0.383525	0.0838326	0.766562	1.30453	2.57327
Per3	-4.56898	-0.604168	0.132233	0.657851	1.5201	2.57327
Rnf149	-4.55872	-0.448602	0.0984053	0.732752	1.36472	2.57327
Lmo7	-4.55618	-0.477524	0.104808	0.718209	1.39235	2.57327
Gdf6	-4.55586	-1.30292	0.285987	0.405306	2.46727	2.57327
2310045N01Rik	-4.55407	-0.461153	0.101262	0.726405	1.37664	2.57327
Cxcl16	-4.55092	-1.14078	0.25067	0.453514	2.205	2.57327
Mylk2	-4.54635	-1.15992	0.255133	0.447537	2.23445	2.57327
AK155877	-4.54624	-0.296071	0.0651244	0.814467	1.2278	2.57327
Iqce	-4.53957	-0.313317	0.0690191	0.80479	1.24256	2.57327
Tgfa	-4.53817	-0.276881	0.0610115	0.825374	1.21157	2.57327
Piezo2	-4.53122	-1.08183	0.238751	0.472428	2.11673	2.57327
Actn1	-4.53062	-0.742445	0.163873	0.597726	1.67301	2.57327
Fpgt	-4.52543	-0.387558	0.0856401	0.764422	1.30818	2.57327
Ccndbp1	-4.52273	-0.484918	0.107218	0.714538	1.39951	2.57327
Lrrc3	-4.51485	-0.388925	0.0861436	0.763698	1.30942	2.57327
Acad10	-4.5119	-0.528037	0.117032	0.693498	1.44197	2.57327
Ttc7	-4.51175	-0.298141	0.0660809	0.8133	1.22956	2.57327
Rxrb	-4.51147	-0.515616	0.11429	0.699494	1.4296	2.57327
Zkscan8	-4.50825	-0.357759	0.0793563	0.780376	1.28143	2.57327
AK015096	-4.5056	-0.511175	0.113453	0.701651	1.42521	2.57327
Pskh1	-4.50233	-0.313602	0.0696534	0.80463	1.24281	2.57327
A630066F11Rik	-4.49987	-0.481924	0.107097	0.716022	1.3966	2.57327
Etv3	-4.49882	-0.305918	0.0679996	0.808927	1.2362	2.57327
AK079714	-4.48325	-1.10895	0.247353	0.463633	2.15688	2.57327
Gm12942	-4.48023	-0.65091	0.145285	0.636878	1.57016	2.57327
Fmo5	-4.47648	-0.540041	0.12064	0.687751	1.45401	2.57327
Btf3	-4.47542	-0.335084	0.074872	0.792738	1.26145	2.57327
Rnf19a	-4.4669	-0.351501	0.0786901	0.783768	1.27589	2.57327
Hmga2	-4.45958	-1.23022	0.275859	0.426254	2.34602	2.57327
Fxr1	-4.45847	-0.403419	0.0904838	0.756064	1.32264	2.57327
Zfp62	-4.45535	-0.34792	0.0780904	0.785716	1.27272	2.57327
4932416H05Rik	-4.4394	-0.448012	0.100917	0.733052	1.36416	2.57327
Loxl3	-4.43435	-1.2652	0.285319	0.416041	2.40361	2.57327
AK187054	-4.43419	-0.36085	0.0813791	0.778706	1.28418	2.57327
Trib1	-4.42719	-1.14254	0.258075	0.45296	2.2077	2.57327
Bach2	-4.42396	-1.04496	0.236204	0.48466	2.0633	2.57327
Zbtb39	-4.42295	-0.437183	0.0988442	0.738575	1.35396	2.57327
Nyap1	-4.42123	-0.49943	0.112962	0.707386	1.41365	2.57327
Ing4	-4.41445	-0.422602	0.0957314	0.746078	1.34034	2.57327
Mmp9	-4.4116	-1.14691	0.259975	0.451592	2.21439	2.57327
Thnsl1	-4.4057	-0.426406	0.0967851	0.744113	1.34388	2.57327
Efhc1	-4.4017	-0.43739	0.0993684	0.738469	1.35415	2.57327
Atp5g2	-4.39153	-0.456363	0.103919	0.728821	1.37208	2.57327
Itgb4	-4.38856	-0.475752	0.108407	0.719092	1.39064	2.57327
Nptn	-4.35755	-0.281322	0.0645596	0.822837	1.21531	2.57327
Elk3	-4.35737	-0.568285	0.130419	0.674418	1.48276	2.57327
Nbeal1	-4.34867	-0.636046	0.146262	0.643474	1.55406	2.57327
BC034549	-4.34791	-0.59089	0.135902	0.663933	1.50618	2.57327
Ids	-4.3343	-0.331743	0.0765391	0.794576	1.25853	2.57327
Sema7a	-4.33364	-1.18285	0.272945	0.440481	2.27024	2.57327
2900097C17Rik	-4.33283	-0.349424	0.0806457	0.784898	1.27405	2.57327
Ier5	-4.33098	-0.646913	0.149369	0.638645	1.56581	2.57327
Kdelr1	-4.33057	-0.43073	0.0994627	0.741886	1.34792	2.57327
Pdzrn3	-4.32632	-0.673773	0.155738	0.626865	1.59524	2.57327
Fstl3	-4.32494	-0.671234	0.155201	0.627969	1.59243	2.57327
Pik3c3	-4.32196	-0.264519	0.0612036	0.832476	1.20124	2.57327
Slc5a7	-4.32136	-0.399038	0.0923409	0.758364	1.31863	2.57327
Maf1	-4.31987	-0.441199	0.102132	0.736522	1.35773	2.57327
Plcl1	-4.31497	-0.560317	0.129854	0.678153	1.47459	2.57327
Anxa5	-4.30654	-0.352534	0.08186	0.783207	1.2768	2.57327
Actg1	-4.30365	-0.562178	0.130628	0.677279	1.4765	2.57327
Cct2	-4.30151	-0.387046	0.0899791	0.764694	1.30771	2.57327
1600020E01Rik	-4.29981	-0.515629	0.119919	0.699488	1.42962	2.57327
Cpe	-4.2981	-0.504522	0.117383	0.704894	1.41865	2.57327
Endod1	-4.29712	-0.504717	0.117455	0.704799	1.41884	2.57327
AK034221	-4.28973	-0.260012	0.0606127	0.835081	1.19749	2.57327
Sap18	-4.28319	-0.597042	0.139392	0.661108	1.51261	2.57327
Tgfb1i1	-4.2822	-0.674356	0.157479	0.626612	1.59588	2.57327
2610306M01Rik	-4.28101	-0.25143	0.0587315	0.840063	1.19039	2.57327
M1ap	-4.27977	-0.589562	0.137756	0.664545	1.50479	2.57327
Runx1	-4.27205	-0.833868	0.195191	0.561023	1.78246	2.57327
Aldh1a3	-4.27205	-1.82643	0.427531	0.281961	3.54659	2.57327
2610015P09Rik	-4.27134	-0.38547	0.0902456	0.76553	1.30629	2.57327
Zfc3h1	-4.26315	-0.400495	0.0939434	0.757598	1.31996	2.57327
Pwwp2b	-4.26236	-0.219661	0.0515349	0.858767	1.16446	2.57327
Klf5	-4.26159	-0.541403	0.127042	0.687102	1.45539	2.57327
Tenm3	-4.25686	-0.683858	0.160649	0.622498	1.60643	2.57327
Cadm1	-4.25384	-0.571308	0.134304	0.673006	1.48587	2.57327
LOC100503496	-4.24931	-0.259371	0.0610384	0.835452	1.19696	2.57327
Inha	-4.24857	-0.356285	0.08386	0.781174	1.28013	2.57327
Nfkbia	-4.24649	-0.49165	0.115778	0.711211	1.40605	2.57327
Shprh	-4.24376	-0.296309	0.0698223	0.814333	1.228	2.57327
Gm14431	-4.24232	-0.488504	0.11515	0.712764	1.40299	2.57327
AK148054	-4.24064	-1.67505	0.394999	0.313156	3.19329	2.57327
E430018J23Rik	-4.23998	-0.64029	0.151012	0.641584	1.55864	2.57327
4933412E12Rik	-4.23995	-0.694806	0.163872	0.617792	1.61867	2.57327
Leprotl1	-4.23827	-0.253703	0.0598599	0.838741	1.19226	2.57327
Smad7	-4.23448	-0.844918	0.199533	0.556742	1.79616	2.57327
B4galt2	-4.23001	-0.532052	0.12578	0.691571	1.44598	2.57327
Tgfb3	-4.22812	-1.03697	0.245255	0.487351	2.05191	2.57327
2010001A14Rik	-4.22762	-1.28943	0.305002	0.409112	2.44432	2.57327
Col20a1	-4.22677	-0.616779	0.145922	0.652125	1.53345	2.57327
2610203C20Rik	-4.22644	-1.67717	0.396827	0.312696	3.198	2.57327
Lrp11	-4.22626	-0.495285	0.117192	0.709422	1.4096	2.57327
Ift46	-4.22492	-0.502566	0.118953	0.70585	1.41673	2.57327
Prkacb	-4.22201	-0.489897	0.116034	0.712076	1.40435	2.57327
Rbms1	-4.22109	-0.449582	0.106508	0.732255	1.36564	2.57327
Col11a2	-4.22	-0.58771	0.139268	0.665398	1.50286	2.57327
2700081O15Rik	-4.21686	-0.254278	0.0603004	0.838406	1.19274	2.57327
Klhl9	-4.21397	-0.343458	0.0815046	0.78815	1.26879	2.57327
Tnfrsf11b	-4.21127	-0.804296	0.190987	0.572641	1.74629	2.57327
0610009L18Rik	-4.21072	-0.391363	0.0929444	0.762409	1.31163	2.57327
Ccdc71l	-4.20942	-0.42281	0.100444	0.74597	1.34054	2.57327
Clip3	-4.20719	-0.601865	0.143056	0.658902	1.51768	2.57327
Kdm5a	-4.2062	-0.446366	0.106121	0.733889	1.3626	2.57327
AK150559	-4.20482	-1.08597	0.258267	0.471076	2.1228	2.57327
Acta2	-4.20314	-1.07997	0.256944	0.473038	2.114	2.57327
Acad12	-4.19842	-0.516982	0.123137	0.698832	1.43096	2.57327
9430091E24Rik	-4.19679	-0.323002	0.0769639	0.799405	1.25093	2.57327
Rp9	-4.18783	-0.296568	0.0708165	0.814187	1.22822	2.57327
Il11	-4.18676	-0.931917	0.222587	0.524161	1.90781	2.57327
Sncaip	-4.18029	-0.662483	0.158478	0.63179	1.5828	2.57327
Odc1	-4.17981	-0.752554	0.180045	0.593552	1.68477	2.57327
Ubxn6	-4.17806	-0.3898	0.0932967	0.763236	1.31021	2.57327
H19	-4.17478	-0.516937	0.123824	0.698854	1.43091	2.57327
AK155239	-4.17006	-0.614901	0.147456	0.652975	1.53145	2.57327
AK149132	-4.16972	-0.484336	0.116156	0.714826	1.39894	2.57327
Ift52	-4.16945	-0.390759	0.0937194	0.762728	1.31108	2.57327
2310061J03Rik	-4.16374	-0.593191	0.142466	0.662875	1.50858	2.57327
Zfp811	-4.16026	-0.207351	0.0498408	0.866126	1.15457	2.57327
Lrrk2	-4.16003	-0.355423	0.0854377	0.78164	1.27936	2.57327
Apc2	-4.15973	-0.217031	0.0521742	0.860334	1.16234	2.57327
Klhl21	-4.15735	-0.505207	0.121521	0.704559	1.41933	2.57327
AK090257	-4.15016	-0.531143	0.127981	0.692006	1.44507	2.57327
Wwc2	-4.14909	-0.582097	0.140295	0.667992	1.49702	2.57327
Aimp1	-4.14804	-0.503488	0.12138	0.705399	1.41764	2.57327
Man2a2	-4.14592	-0.252324	0.0608608	0.839543	1.19112	2.57327
Akap7	-4.14363	-0.849908	0.205112	0.55482	1.80239	2.57327
Prkrir	-4.14223	-0.560316	0.135269	0.678153	1.47459	2.57327
3632451O06Rik	-4.1408	-0.219375	0.0529789	0.858938	1.16423	2.57327
0610011F06Rik	-4.13504	-0.807675	0.195325	0.571302	1.75039	2.57327
Dio3	-4.12762	-1.36352	0.33034	0.388634	2.57312	2.57327
BC147260	-4.12583	-0.603109	0.146179	0.658334	1.51899	2.57327
Tnfaip3	-4.11753	-0.728357	0.176892	0.603591	1.65675	2.57327
Hspa8	-4.11713	-0.360374	0.0875303	0.778963	1.28376	2.57327
Rnf103	-4.11695	-0.351108	0.0852837	0.783982	1.27554	2.57327
Smad3	-4.11518	-0.348473	0.0846799	0.785415	1.27321	2.57327
Egr2	-4.11415	-1.10118	0.267656	0.466136	2.1453	2.57327
Ctso	-4.11349	-0.757553	0.184163	0.591499	1.69062	2.57327
Igf1r	-4.10708	-0.603213	0.146872	0.658286	1.5191	2.57327
Lpp	-4.1063	-1.01287	0.246661	0.495561	2.01791	2.57327
Ube2b	-4.10536	-0.287189	0.0699546	0.819497	1.22026	2.57327
Cstad	-4.10448	-0.858354	0.209126	0.551581	1.81297	2.57327
Fam117b	-4.10149	-0.346027	0.0843662	0.786748	1.27106	2.57327
Lpin1	-4.09197	-0.346629	0.0847094	0.78642	1.27159	2.57327
Adrb3	-4.09058	-0.490189	0.119834	0.711932	1.40463	2.57327
Gabpa	-4.09033	-0.332088	0.0811886	0.794386	1.25883	2.57327
AK138941	-4.08971	-0.28061	0.0686138	0.823243	1.21471	2.57327
Rpl39	-4.08645	-0.364345	0.0891594	0.776821	1.2873	2.57327
Ifitm3	-4.08166	-0.209714	0.0513795	0.864709	1.15646	2.57327
Ppp1r12a	-4.08101	-0.391239	0.0958683	0.762474	1.31152	2.57327
Klf7	-4.07003	-1.01644	0.249738	0.494334	2.02292	2.57327
Yipf2	-4.06721	-0.532735	0.130983	0.691243	1.44667	2.57327
Rnf114	-4.06717	-0.552833	0.135926	0.68168	1.46696	2.57327
Flna	-4.06461	-0.688219	0.16932	0.62062	1.61129	2.57327
Eif3l	-4.06392	-0.369483	0.0909178	0.77406	1.29189	2.57327
Gid4	-4.05932	-0.579409	0.142735	0.669238	1.49424	2.57327
1700020I14Rik	-4.05656	-0.343814	0.084755	0.787956	1.26911	2.57327
Phtf1	-4.05613	-0.308404	0.076034	0.807535	1.23834	2.57327
Zbtb4	-4.05371	-0.460708	0.113651	0.72663	1.37622	2.57327
Klhl26	-4.05362	-0.546116	0.134723	0.684861	1.46015	2.57327
R74862	-4.05187	-0.366872	0.0905439	0.775462	1.28955	2.57327
Pdgfc	-4.05072	-0.591671	0.146066	0.663574	1.50699	2.57327
Tbc1d22a	-4.0475	-0.294447	0.072748	0.815385	1.22642	2.57327
Farp1	-4.04633	-0.343795	0.0849647	0.787966	1.26909	2.57327
Gadd45b	-4.04333	-0.622423	0.153938	0.649579	1.53946	2.57327
1700023F06Rik	-4.03803	-0.253563	0.0627938	0.838822	1.19215	2.57327
Ndufa6	-4.03781	-0.507125	0.125594	0.703623	1.42122	2.57327
Dnm3os	-4.0351	-0.778969	0.193048	0.582783	1.7159	2.57327
Rpsa	-4.03467	-0.301878	0.074821	0.811196	1.23275	2.57327
Gcnt2	-4.03114	-0.784793	0.194682	0.580435	1.72284	2.57327
Plscr3	-4.02992	-0.326287	0.0809662	0.797587	1.25378	2.57327
Bbs2	-4.02578	-0.482785	0.119923	0.715595	1.39744	2.57327
Dnase1l1	-4.02361	-0.331442	0.0823741	0.794742	1.25827	2.57327
Shisa4	-4.01487	-0.640899	0.159631	0.641313	1.5593	2.57327
Zfp626	-4.01074	-0.467237	0.116496	0.723349	1.38246	2.57327
Csnk1e	-4.00949	-0.362517	0.0904147	0.777807	1.28567	2.57327
Mgea5	-4.00912	-0.337566	0.0841994	0.791375	1.26362	2.57327
Marveld1	-4.00866	-0.42782	0.106724	0.743384	1.3452	2.57327
Cln3	-4.00768	-0.487635	0.121675	0.713193	1.40214	2.57327
Sp1	-4.00239	-0.461113	0.11521	0.726426	1.3766	2.57327
Dnajb9	-4.00041	-0.554926	0.138717	0.680692	1.46909	2.57327
Esyt2	-3.99986	-0.508096	0.127028	0.70315	1.42217	2.57327
AK139373	-3.9987	-0.202445	0.0506276	0.869077	1.15065	2.57327
Cd40	-3.99678	-0.423652	0.105998	0.745535	1.34132	2.57327
Psme2b	-3.99436	-0.652336	0.163314	0.636249	1.57171	2.57327
Metap1d	-3.99213	-0.541352	0.135605	0.687127	1.45534	2.57327
Zfp7	-3.99197	-0.308499	0.07728	0.807481	1.23842	2.57327
Sh3kbp1	-3.99159	-1.07186	0.26853	0.475704	2.10215	2.57327
Nfatc4	-3.98758	-0.394094	0.0988305	0.760967	1.31412	2.57327
Irak2	-3.987	-0.611036	0.153257	0.654726	1.52736	2.57327
S100a6	-3.98563	-0.423874	0.106351	0.74542	1.34153	2.57327
Ajuba	-3.98498	-0.718569	0.180319	0.6077	1.64555	2.57327
AK081879	-3.98324	-0.596549	0.149765	0.661334	1.5121	2.57327
Khnyn	-3.982	-0.600204	0.150729	0.659661	1.51593	2.57327
Jade2	-3.98119	-0.701586	0.176225	0.614896	1.62629	2.57327
AK170033	-3.97202	-0.274728	0.0691659	0.826606	1.20977	2.57327
Il3ra	-3.96818	-0.613884	0.154702	0.653435	1.53037	2.57327
Tnnc1	-3.96708	-0.755837	0.190527	0.592203	1.68861	2.57327
Cyp4v3	-3.96668	-0.595399	0.1501	0.661861	1.51089	2.57327
Grcc10	-3.96524	-0.537279	0.135497	0.689069	1.45123	2.57327
Marcksl1	-3.96226	-0.784211	0.19792	0.580669	1.72215	2.57327
Lypd1	-3.9591	-0.743548	0.187807	0.597269	1.67429	2.57327
Bola1	-3.95757	-0.349292	0.0882592	0.784969	1.27393	2.57327
Taz	-3.95682	-0.314039	0.0793665	0.804387	1.24318	2.57327
Enpp1	-3.95271	-0.827866	0.209443	0.563362	1.77506	2.57327
Slc4a7	-3.95239	-0.612753	0.155034	0.653948	1.52917	2.57327
Sbf2	-3.94916	-0.197236	0.0499439	0.87222	1.1465	2.57327
Pawr	-3.94632	-0.303149	0.0768181	0.810481	1.23383	2.57327
BC039192	-3.94565	-0.289806	0.0734495	0.818012	1.22248	2.57327
Cnn3	-3.94529	-0.423075	0.107236	0.745833	1.34078	2.57327
Palld	-3.94268	-0.649739	0.164796	0.637396	1.56888	2.57327
Zfp219	-3.93927	-0.359087	0.0911557	0.779658	1.28261	2.57327
Rgs17	-3.93042	-0.400451	0.101885	0.757621	1.31992	2.57327
Snx18	-3.93022	-0.409855	0.104283	0.752699	1.32855	2.57327
AK009121	-3.92912	-0.871889	0.221904	0.546431	1.83006	2.57327
Sphk1	-3.92741	-1.13645	0.289364	0.454878	2.19839	2.57327
Klhl17	-3.92536	-0.478747	0.121963	0.717601	1.39353	2.57327
Mtmr14	-3.92145	-0.734455	0.187292	0.601045	1.66377	2.57327
Fam60a	-3.91239	-0.556113	0.142141	0.680132	1.4703	2.57327
Rpl30	-3.91097	-0.403719	0.103227	0.755907	1.32291	2.57327
Pbld2	-3.90978	-0.235443	0.060219	0.849424	1.17727	2.57327
Cep83os	-3.90768	-0.309169	0.0791181	0.807107	1.23899	2.57327
Siva1	-3.90584	-0.320918	0.0821634	0.800561	1.24912	2.57327
Kctd11	-3.90553	-0.705332	0.180598	0.613301	1.63052	2.57327
Scarf2	-3.90426	-0.419926	0.107556	0.747463	1.33786	2.57327
Pgf	-3.90401	-0.508424	0.130231	0.70299	1.4225	2.57327
Ccl17	-3.90192	-1.34427	0.344515	0.393854	2.53901	2.57327
Pdgfrl	-3.896	-0.679442	0.174395	0.624407	1.60152	2.57327
Dqx1	-3.89474	-0.413367	0.106135	0.750869	1.33179	2.57327
Pkp1	-3.89103	-0.740392	0.190281	0.598577	1.67063	2.57327
Ipo7	-3.89087	-0.24955	0.0641375	0.841158	1.18884	2.57327
Zbtb1	-3.8892	-0.189453	0.0487127	0.876938	1.14033	2.57327
Spaca6	-3.88904	-1.02735	0.264165	0.490611	2.03827	2.57327
Nes	-3.88878	-0.703728	0.180964	0.613983	1.62871	2.57327
Med13l	-3.88396	-0.574097	0.147812	0.671706	1.48875	2.57327
Prss23	-3.88206	-0.642792	0.16558	0.640472	1.56135	2.57327
Ncam1	-3.88114	-0.698079	0.179864	0.616392	1.62234	2.57327
Ccdc74a	-3.87542	-0.693834	0.179035	0.618209	1.61758	2.57327
Gm14005	-3.87469	-0.448838	0.115838	0.732633	1.36494	2.57327
Gm3383	-3.87221	-0.413807	0.106866	0.75064	1.3322	2.57327
Tll1	-3.86556	-1.19612	0.30943	0.436447	2.29123	2.57327
Slc7a7	-3.86481	-0.602726	0.155952	0.658508	1.51858	2.57327
4930402H24Rik	-3.86215	-0.273316	0.0707678	0.827416	1.20858	2.57327
Irf1	-3.86179	-0.813273	0.210594	0.569089	1.75719	2.57327
Trim23	-3.85972	-0.388788	0.10073	0.763771	1.30929	2.57327
Lrrc32	-3.85373	-0.990045	0.256906	0.503462	1.98625	2.57327
C130021I20Rik	-3.85221	-0.370673	0.0962235	0.773421	1.29296	2.57327
E130308A19Rik	-3.8481	-0.27462	0.0713649	0.826668	1.20968	2.57327
Rasa4	-3.83735	-0.464513	0.12105	0.724715	1.37985	2.57327
A930018M24Rik	-3.82317	-0.334077	0.0873823	0.793291	1.26057	2.57327
Mgat3	-3.82151	-0.826326	0.21623	0.563963	1.77316	2.57327
Tceanc2	-3.81995	-0.390425	0.102207	0.762905	1.31078	2.57327
Zfp57	-3.81934	-0.708988	0.185631	0.611749	1.63466	2.57327
Prss12	-3.81551	-0.520583	0.136439	0.69709	1.43453	2.57327
5730409E04Rik	-3.80581	-0.207707	0.0545763	0.865912	1.15485	2.57327
Rnf214	-3.80395	-0.191989	0.050471	0.875398	1.14234	2.57327
St6galnac5	-3.80129	-0.513251	0.13502	0.700642	1.42726	2.57327
H1f0	-3.80101	-0.485199	0.12765	0.714399	1.39978	2.57327
Rpl14-ps1	-3.79999	-0.44202	0.116321	0.736103	1.3585	2.57327
Eya4	-3.79914	-0.612421	0.1612	0.654098	1.52882	2.57327
Cryz	-3.79306	-0.460838	0.121495	0.726564	1.37634	2.57327
Dirc2	-3.79278	-0.338123	0.0891491	0.79107	1.26411	2.57327
Sned1	-3.79158	-0.738376	0.194741	0.599414	1.6683	2.57327
Uba52	-3.78959	-0.229679	0.0606078	0.852825	1.17257	2.57327
Dkk2	-3.78494	-0.621978	0.16433	0.649779	1.53898	2.57327
Smc5	-3.78493	-0.420192	0.111017	0.747325	1.33811	2.57327
Ick	-3.78281	-0.342429	0.0905225	0.788712	1.26789	2.57327
Tppp3	-3.78217	-1.22364	0.323527	0.428202	2.33534	2.57327
Txnip	-3.77504	-0.686413	0.181829	0.621397	1.60928	2.57327
Atrn	-3.77416	-0.274727	0.0727916	0.826607	1.20976	2.57327
Nr1h2	-3.77375	-0.334563	0.0886553	0.793025	1.26099	2.57327
Hcfc1r1	-3.7717	-0.445774	0.118189	0.73419	1.36204	2.57327
Baiap2l2	-3.76808	-0.676882	0.179636	0.625516	1.59868	2.57327
Zfp760	-3.76759	-0.515337	0.136782	0.699629	1.42933	2.57327
Gjb4	-3.76753	-0.662682	0.175893	0.631703	1.58302	2.57327
Gbp2	-3.7665	-1.45303	0.385777	0.365253	2.73782	2.57327
Noxo1	-3.76284	-0.290798	0.0772815	0.81745	1.22332	2.57327
Ypel3	-3.76231	-0.528941	0.140589	0.693063	1.44287	2.57327
Kcnk12	-3.76162	-1.07746	0.286435	0.473862	2.11032	2.57327
Cnnm4	-3.75925	-0.495533	0.131817	0.709299	1.40984	2.57327
4931406P16Rik	-3.75765	-0.534648	0.142283	0.690327	1.44859	2.57327
Phldb2	-3.75221	-0.288276	0.0768282	0.81888	1.22118	2.57327
Zdhhc2	-3.74798	-0.31056	0.0828607	0.806329	1.24019	2.57327
Gm11517	-3.7457	-0.583811	0.155862	0.667199	1.4988	2.57327
Fam43a	-3.74385	-0.295103	0.0788234	0.815014	1.22697	2.57327
2900052L18Rik	-3.74316	-0.467882	0.124997	0.723025	1.38308	2.57327
AK049951	-3.74296	-0.279106	0.0745685	0.824101	1.21344	2.57327
Gm53	-3.7406	-0.529686	0.141604	0.692705	1.44362	2.57327
Hmg20a	-3.73684	-0.244498	0.0654293	0.844109	1.18468	2.57327
Zrsr1	-3.73207	-0.603995	0.161839	0.65793	1.51992	2.57327
Zfp697	-3.7292	-0.422309	0.113244	0.746229	1.34007	2.57327
Pigg	-3.72491	-0.297857	0.0799634	0.81346	1.22932	2.57327
Paip2	-3.72304	-0.385338	0.103501	0.765599	1.30617	2.57327
Nedd9	-3.7229	-0.698963	0.187747	0.616015	1.62334	2.57327
Filip1l	-3.71881	-0.967926	0.260278	0.511241	1.95603	2.57327
Zbtb44	-3.71563	-0.19598	0.0527446	0.87298	1.1455	2.57327
AK019057	-3.71542	-1.45298	0.391069	0.365265	2.73774	2.57327
Tjp1	-3.71324	-0.333448	0.0897996	0.793638	1.26002	2.57327
Lhfp	-3.71145	-0.654347	0.176305	0.635363	1.5739	2.57327
Stx6	-3.71068	-0.276628	0.0745493	0.825518	1.21136	2.57327
Zswim7	-3.71002	-0.469284	0.126491	0.722323	1.38442	2.57327
2810403D21Rik	-3.70907	-0.768023	0.207066	0.587222	1.70293	2.57327
Sorbs1	-3.69663	-0.923106	0.249716	0.527373	1.89619	2.57327
Sdf2	-3.69491	-0.335905	0.0909102	0.792287	1.26217	2.57327
Parm1	-3.69394	-1.54195	0.417428	0.34342	2.91189	2.57327
Gm13375	-3.69373	-0.495659	0.134189	0.709238	1.40996	2.57327
Reck	-3.68984	-0.579827	0.157141	0.669044	1.49467	2.57327
Tppp	-3.68801	-0.287226	0.0778812	0.819476	1.22029	2.57327
Psmd8	-3.68576	-0.266044	0.0721817	0.831597	1.20251	2.57327
U90926	-3.68111	-1.48749	0.404088	0.356632	2.80401	2.57327
Snhg18	-3.67923	-0.262913	0.0714588	0.833404	1.1999	2.57327
Prdm1	-3.67873	-0.695673	0.189107	0.617421	1.61964	2.57327
Serpina3h	-3.67623	-0.423113	0.115094	0.745814	1.34082	2.57327
Phf7	-3.67289	-0.508399	0.138419	0.703002	1.42247	2.57327
Slc2a8	-3.67215	-0.582809	0.158711	0.667663	1.49776	2.57327
Itgav	-3.67151	-0.491459	0.133857	0.711305	1.40587	2.57327
Agbl5	-3.66931	-0.573602	0.156324	0.671937	1.48823	2.57327
Mapk3	-3.66911	-0.388715	0.105943	0.76381	1.30923	2.57327
Stk32c	-3.66749	-0.197038	0.0537256	0.87234	1.14634	2.57327
Grik5	-3.66436	-0.316232	0.0862993	0.803165	1.24507	2.57327
Trpt1	-3.65851	-0.282117	0.0771124	0.822384	1.21598	2.57327
Kif26b	-3.65843	-0.512678	0.140136	0.70092	1.4267	2.57327
AK204572	-3.65821	-1.33446	0.364784	0.396541	2.52181	2.57327
Anxa1	-3.6579	-0.220683	0.0603306	0.858159	1.16529	2.57327
Cflar	-3.65433	-0.617046	0.168854	0.652004	1.53373	2.57327
Nuak1	-3.65415	-0.75098	0.205514	0.5942	1.68294	2.57327
Vpreb1	-3.65015	-0.316098	0.0865987	0.803239	1.24496	2.57327
Tmem204	-3.64687	-0.81153	0.222528	0.569777	1.75507	2.57327
P4ha3	-3.64666	-0.657255	0.180234	0.634084	1.57708	2.57327
Eid2b	-3.64577	-0.35527	0.0974471	0.781723	1.27922	2.57327
Map1lc3b	-3.64231	-0.278182	0.0763753	0.824629	1.21267	2.57327
Bmyc	-3.64133	-0.373461	0.102562	0.771929	1.29546	2.57327
Mettl23	-3.63943	-0.370497	0.101801	0.773516	1.2928	2.57327
Gm15908	-3.63848	-0.344568	0.0947011	0.787544	1.26977	2.57327
AK080383	-3.63235	-0.255055	0.0702175	0.837955	1.19338	2.57327
Klhl28	-3.62595	-0.40619	0.112023	0.754613	1.32518	2.57327
Jag1	-3.6244	-0.7089	0.195591	0.611786	1.63456	2.57327
Ric8	-3.62384	-0.358804	0.099012	0.779811	1.28236	2.57327
Lmod1	-3.62294	-1.38748	0.382969	0.382233	2.61621	2.57327
Tnip1	-3.62066	-0.347014	0.0958428	0.78621	1.27193	2.57327
Acvr1b	-3.61734	-0.554993	0.153426	0.68066	1.46916	2.57327
Phf1	-3.61559	-0.397589	0.109965	0.759126	1.3173	2.57327
AK034072	-3.60947	-0.500289	0.138604	0.706965	1.4145	2.57327
Dio3os	-3.60822	-0.457393	0.126764	0.728301	1.37306	2.57327
Ptpn18	-3.60699	-0.393139	0.108994	0.761471	1.31325	2.57327
AK043046	-3.5989	-0.264164	0.0734015	0.832681	1.20094	2.57327
Ptp4a3	-3.59861	-0.427198	0.118712	0.743705	1.34462	2.57327
Tnfsf18	-3.59687	-1.03709	0.288332	0.487308	2.05209	2.57327
Ccdc28a	-3.59589	-0.763441	0.212309	0.58909	1.69753	2.57327
Hist2h2aa2	-3.59367	-0.923192	0.256894	0.527341	1.89631	2.57327
Snhg14	-3.59308	-0.185512	0.0516303	0.879337	1.13722	2.57327
Plec	-3.59017	-0.588781	0.163998	0.664904	1.50398	2.57327
Izumo4	-3.58196	-0.81666	0.227992	0.567755	1.76132	2.57327
Nfatc1	-3.58166	-0.415751	0.116078	0.749629	1.33399	2.57327
Rnd3	-3.58073	-0.277283	0.0774376	0.825143	1.21191	2.57327
Tnfsfm13	-3.57861	-0.693554	0.193805	0.618329	1.61726	2.57327
Chmp5	-3.57739	-0.336224	0.0939858	0.792112	1.26245	2.57327
Lztfl1	-3.57668	-0.400949	0.112101	0.75736	1.32038	2.57327
Bean1	-3.57626	-0.513926	0.143705	0.700314	1.42793	2.57327
C030006K11Rik	-3.57546	-0.669028	0.187117	0.62893	1.59	2.57327
1110046J04Rik	-3.57085	-0.383221	0.107319	0.766724	1.30425	2.57327
BC096391	-3.56858	-0.376078	0.105386	0.770529	1.29781	2.57327
Thtpa	-3.56629	-0.257863	0.0723056	0.836326	1.19571	2.57327
Inhba	-3.56508	-1.31237	0.368117	0.402659	2.48349	2.57327
Imp3	-3.56409	-0.419366	0.117664	0.747753	1.33734	2.57327
Cnppd1	-3.56145	-0.365196	0.102541	0.776363	1.28806	2.57327
Pcf11	-3.56128	-0.424724	0.119262	0.744981	1.34232	2.57327
Inca1	-3.55893	-0.42945	0.120668	0.742545	1.34672	2.57327
Ube2ql1	-3.55862	-0.375142	0.105418	0.771029	1.29697	2.57327
C1qtnf4	-3.55672	-0.160273	0.0450621	0.894856	1.1175	2.57327
Vmac	-3.55484	-0.658522	0.185246	0.633527	1.57846	2.57327
Cys1	-3.55414	-0.449247	0.126401	0.732425	1.36533	2.57327
Comp	-3.54324	-0.390445	0.110194	0.762894	1.3108	2.57327
BC058545	-3.54197	-0.37168	0.104936	0.772882	1.29386	2.57327
Unc5b	-3.54041	-0.414573	0.117097	0.750242	1.3329	2.57327
Jak2	-3.53876	-0.757387	0.214026	0.591567	1.69043	2.57327
Nfkbie	-3.53791	-0.322541	0.0911671	0.79966	1.25053	2.57327
Inpp5e	-3.53686	-0.436247	0.123343	0.739054	1.35308	2.57327
Tsga10	-3.53408	-0.282635	0.0799741	0.822088	1.21641	2.57327
Chp1	-3.53404	-0.347317	0.0982776	0.786045	1.27219	2.57327
Plcd1	-3.5328	-0.273969	0.07755	0.827041	1.20913	2.57327
Rpl38	-3.53083	-0.341915	0.096837	0.788993	1.26744	2.57327
Nkd2	-3.5305	-0.584233	0.165482	0.667004	1.49924	2.57327
Rnf38	-3.53038	-0.422355	0.119635	0.746205	1.34011	2.57327
Trps1	-3.52901	-0.340141	0.0963841	0.789964	1.26588	2.57327
Kiz	-3.52506	-0.842734	0.239069	0.557586	1.79345	2.57327
Bcl7a	-3.52488	-0.330903	0.0938764	0.795038	1.2578	2.57327
Igf1	-3.52405	-0.737088	0.20916	0.599949	1.66681	2.57327
KP174839	-3.52318	-0.73384	0.208289	0.601301	1.66306	2.57327
Npas4	-3.52149	-0.306139	0.0869346	0.808803	1.23639	2.57327
Rad52	-3.52127	-0.727464	0.206592	0.603965	1.65573	2.57327
C1galt1c1	-3.5202	-0.323117	0.0917893	0.799341	1.25103	2.57327
0610040B10Rik	-3.51438	-0.93218	0.265247	0.524066	1.90816	2.57327
Sh2b3	-3.50958	-0.631968	0.180069	0.645296	1.54968	2.57327
Zfp53	-3.50827	-0.312634	0.0891134	0.80517	1.24197	2.57327
Pstpip1	-3.50729	-0.470562	0.134167	0.721683	1.38565	2.57327
Nlrp5-ps	-3.50621	-0.199141	0.0567967	0.871069	1.14801	2.57327
Tbx18	-3.5029	-0.580606	0.16575	0.668683	1.49548	2.57327
Eif1	-3.50182	-0.427825	0.122172	0.743382	1.3452	2.57327
Zfp712	-3.49921	-0.258446	0.0738584	0.835988	1.19619	2.57327
Kifap3	-3.4942	-0.331767	0.0949481	0.794563	1.25855	2.57327
AK207499	-3.48792	-1.03518	0.296789	0.487956	2.04937	2.57327
AK217854	-3.48699	-0.430099	0.123344	0.742211	1.34733	2.57327
6330403K07Rik	-3.48601	-0.451451	0.129504	0.731307	1.36742	2.57327
Gramd1a	-3.48538	-0.484321	0.138958	0.714833	1.39893	2.57327
Apopt1	-3.47827	-0.328168	0.0943483	0.796547	1.25542	2.57327
Haghl	-3.47557	-0.469475	0.135079	0.722228	1.38461	2.57327
Derl3	-3.47533	-0.434863	0.125129	0.739764	1.35178	2.57327
Epb4.1l2	-3.47338	-0.480178	0.138245	0.716889	1.39492	2.57327
Lrfn3	-3.47253	-0.225732	0.065005	0.855161	1.16937	2.57327
Cyp1b1	-3.47216	-0.479022	0.137961	0.717464	1.3938	2.57327
Slc41a1	-3.472	-0.28451	0.0819442	0.82102	1.218	2.57327
Arid3a	-3.46981	-0.596743	0.171982	0.661245	1.5123	2.57327
Sppl3	-3.46818	-0.329825	0.0951002	0.795633	1.25686	2.57327
Tmem8b	-3.4674	-0.308142	0.0888682	0.807681	1.23811	2.57327
Cntfr	-3.46688	-0.40973	0.118184	0.752764	1.32844	2.57327
Arl5a	-3.46027	-0.493487	0.142615	0.710306	1.40784	2.57327
Synj2	-3.45873	-0.665877	0.192521	0.630306	1.58653	2.57327
Tpt1	-3.45494	-0.403951	0.11692	0.755786	1.32313	2.57327
Tmem170	-3.45107	-0.283409	0.0821223	0.821647	1.21707	2.57327
Pddc1	-3.45083	-0.573544	0.166205	0.671964	1.48817	2.57327
Nipal3	-3.45068	-0.398159	0.115386	0.758826	1.31783	2.57327
AK031732	-3.4506	-0.236348	0.0684946	0.848892	1.17801	2.57327
Cast	-3.44855	-0.27581	0.0799785	0.825987	1.21067	2.57327
Rnf122	-3.44539	-0.417121	0.121067	0.748917	1.33526	2.57327
Spred1	-3.44521	-0.300597	0.0872505	0.811917	1.23165	2.57327
Rps12	-3.44465	-0.202538	0.058798	0.86902	1.15072	2.57327
P3h4	-3.4445	-0.41256	0.119773	0.751289	1.33105	2.57327
Rnf128	-3.4417	-0.546171	0.158692	0.684835	1.4602	2.57327
Zmat1	-3.44118	-0.463134	0.134586	0.725409	1.37853	2.57327
Efnb1	-3.44108	-0.549062	0.159561	0.683464	1.46313	2.57327
Smox	-3.43874	-0.370485	0.107738	0.773522	1.29279	2.57327
Mrpl23	-3.43475	-0.407177	0.118546	0.754097	1.32609	2.57327
Il2rg	-3.42844	-0.810837	0.236503	0.570051	1.75423	2.57327
Slc10a3-ubl4	-3.42801	-0.590773	0.172337	0.663987	1.50605	2.57327
Rnf44	-3.4258	-0.391938	0.114408	0.762105	1.31215	2.57327
Tnfrsf11a	-3.42485	-0.546632	0.159608	0.684617	1.46067	2.57327
Golga5	-3.42189	-0.371959	0.1087	0.772733	1.29411	2.57327
Sox4	-3.41973	-0.398726	0.116596	0.758528	1.31834	2.57327
Serf1	-3.41846	-0.818959	0.239569	0.566851	1.76413	2.57327
6330419J24Rik	-3.41787	-0.39395	0.115262	0.761043	1.31399	2.57327
Sugct	-3.41778	-0.414923	0.121401	0.75006	1.33323	2.57327
Podxl2	-3.41656	-0.369547	0.108164	0.774025	1.29195	2.57327
Ing1	-3.41435	-0.293791	0.086046	0.815756	1.22586	2.57327
Zfp775	-3.41348	-0.261554	0.076624	0.834189	1.19877	2.57327
Peg3	-3.41336	-0.659145	0.193107	0.633254	1.57915	2.57327
Zfp560	-3.41292	-0.243969	0.071484	0.844419	1.18425	2.57327
Dusp1	-3.41113	-0.80928	0.237247	0.570667	1.75234	2.57327
AK011205	-3.4096	-0.344012	0.100895	0.787847	1.26928	2.57327
Trmu	-3.40595	-0.429443	0.126086	0.742548	1.34671	2.57327
Gpr176	-3.40204	-0.652389	0.191764	0.636226	1.57177	2.57327
Armcx5	-3.39839	-0.311043	0.0915266	0.806059	1.2406	2.57327
Amer1	-3.398	-0.303621	0.0893531	0.810216	1.23424	2.57327
Egr1	-3.39788	-1.58779	0.467289	0.33268	3.00589	2.57327
Skap1	-3.39316	-0.188175	0.0554571	0.877716	1.13932	2.57327
Zfp955a	-3.38871	-0.239461	0.0706644	0.847062	1.18055	2.57327
Zfp862-ps	-3.38842	-0.410659	0.121195	0.752279	1.32929	2.57327
Parva	-3.38417	-0.341468	0.100901	0.789238	1.26705	2.57327
Tigd5	-3.38356	-0.212748	0.062877	0.862892	1.15889	2.57327
Tmem87b	-3.38273	-0.284012	0.0839594	0.821304	1.21758	2.57327
Nipal4	-3.3826	-0.440022	0.130084	0.737123	1.35663	2.57327
AK028224	-3.38005	-0.480074	0.142032	0.716941	1.39482	2.57327
Chchd5	-3.37763	-0.504532	0.149374	0.704889	1.41866	2.57327
Pex11g	-3.37037	-0.503507	0.149392	0.70539	1.41766	2.57327
Agrn	-3.36792	-0.474465	0.140878	0.719734	1.3894	2.57327
AK018134	-3.36703	-0.236243	0.0701636	0.848953	1.17792	2.57327
BC062895	-3.36549	-0.206245	0.0612824	0.86679	1.15368	2.57327
Atp9a	-3.36089	-0.470483	0.139988	0.721723	1.38557	2.57327
Zscan26	-3.35748	-0.231253	0.0688769	0.851895	1.17385	2.57327
Tnnt3	-3.35649	-0.436505	0.130048	0.738923	1.35332	2.57327
Mir22hg	-3.35065	-0.807101	0.240879	0.571529	1.74969	2.57327
Abcd1	-3.35055	-0.197932	0.0590743	0.8718	1.14705	2.57327
Dok7	-3.3496	-0.257413	0.0768488	0.836587	1.19533	2.57327
5031434O11Rik	-3.34906	-0.257913	0.0770106	0.836297	1.19575	2.57327
Ccnj	-3.34485	-0.261164	0.0780793	0.834415	1.19844	2.57327
AA543186	-3.34409	-0.403593	0.120689	0.755973	1.3228	2.57327
Mfap5	-3.34261	-0.405703	0.121373	0.754868	1.32473	2.57327
Defb25	-3.33716	-0.532903	0.159688	0.691163	1.44684	2.57327
Zfp526	-3.33651	-0.24537	0.073541	0.843599	1.1854	2.57327
Fzd8	-3.33601	-0.268966	0.0806251	0.829914	1.20494	2.57327
Zfp385c	-3.33477	-0.198796	0.059613	0.871277	1.14774	2.57327
Fgf7	-3.33326	-0.700567	0.210175	0.61533	1.62514	2.57327
Atp2c1	-3.33207	-0.26448	0.0793742	0.832499	1.2012	2.57327
AA388235	-3.33085	-0.252793	0.0758945	0.83927	1.19151	2.57327
Cxcr6	-3.32998	-1.44918	0.435192	0.36623	2.73053	2.57327
Msrb1	-3.32668	-0.301337	0.0905821	0.8115	1.23229	2.57327
Tarm1	-3.32645	-0.189627	0.0570058	0.876832	1.14047	2.57327
Dusp6	-3.32471	-1.02905	0.309516	0.490033	2.04068	2.57327
Esm1	-3.32338	-0.610092	0.183576	0.655155	1.52636	2.57327
Bbs10	-3.32237	-0.295664	0.0889918	0.814697	1.22745	2.57327
Asah2	-3.32093	-0.306716	0.0923586	0.80848	1.23689	2.57327
Aptx	-3.31814	-0.2041	0.0615101	0.86808	1.15197	2.57327
Tshz2	-3.3168	-0.273222	0.0823753	0.827469	1.2085	2.57327
Ino80b	-3.31182	-0.399856	0.120736	0.757934	1.31938	2.57327
Map2k4	-3.30951	-0.278951	0.0842877	0.82419	1.21331	2.57327
Erap1	-3.30876	-0.639261	0.193203	0.642042	1.55753	2.57327
Hpx	-3.30828	-0.328247	0.0992197	0.796504	1.25549	2.57327
Mapk1ip1	-3.30294	-0.460914	0.139547	0.726526	1.37641	2.57327
Pkd1	-3.29951	-0.376197	0.114016	0.770466	1.29792	2.57327
9130019O22Rik	-3.29908	-0.258845	0.0784597	0.835757	1.19652	2.57327
Tnfrsf14	-3.29755	-0.657821	0.199488	0.633835	1.5777	2.57327
Gm16576	-3.29667	-0.3051	0.092548	0.809386	1.2355	2.57327
Adamts8	-3.29549	-0.244444	0.0741754	0.844141	1.18464	2.57327
Rhob	-3.29391	-0.673284	0.204403	0.627078	1.5947	2.57327
Pls3	-3.29219	-0.38162	0.115917	0.767575	1.3028	2.57327
Lif	-3.29163	-0.588059	0.178653	0.665238	1.50322	2.57327
Rpl35	-3.29054	-0.279424	0.0849174	0.82392	1.21371	2.57327
4930429B21Rik	-3.28992	-0.79556	0.241818	0.576119	1.73575	2.57327
Apcdd1	-3.28785	-0.598686	0.18209	0.660355	1.51434	2.57327
Nradd	-3.28504	-0.382807	0.11653	0.766944	1.30388	2.57327
Gramd4	-3.28485	-0.604724	0.184095	0.657597	1.52069	2.57327
Cct4	-3.28145	-0.455049	0.138673	0.729486	1.37083	2.57327
Pqlc3	-3.27522	-0.264622	0.080795	0.832417	1.20132	2.57327
Zfp358	-3.2752	-0.464058	0.141688	0.724944	1.37942	2.57327
Tbc1d2	-3.27466	-0.721271	0.220258	0.606563	1.64863	2.57327
Chd5	-3.27311	-0.363449	0.111041	0.777304	1.2865	2.57327
Angel2	-3.27275	-0.162527	0.0496607	0.893459	1.11925	2.57327
Ctif	-3.26938	-0.368088	0.112586	0.774809	1.29064	2.57327
E330009J07Rik	-3.26703	-0.267236	0.0817978	0.83091	1.2035	2.57327
Zfp266	-3.26661	-0.253962	0.0777448	0.838591	1.19248	2.57327
Zfp719	-3.26601	-0.306267	0.0937741	0.808732	1.2365	2.57327
Rsph9	-3.26459	-0.591595	0.181215	0.663609	1.50691	2.57327
Azin2	-3.26451	-0.554088	0.169731	0.681088	1.46824	2.57327
Siglecg	-3.26318	-1.01464	0.310936	0.494952	2.0204	2.57327
C87436	-3.26037	-0.288355	0.0884426	0.818835	1.22125	2.57327
Trappc12	-3.25904	-0.232456	0.0713263	0.851185	1.17483	2.57327
Zfp688	-3.25788	-0.600202	0.184231	0.659661	1.51593	2.57327
Cyb5rl	-3.25747	-0.496012	0.152269	0.709064	1.41031	2.57327
Dlg4	-3.25683	-0.362804	0.111398	0.777652	1.28592	2.57327
Syt12	-3.25651	-0.478449	0.146921	0.717749	1.39325	2.57327
Plac8	-3.2558	-0.761488	0.233887	0.589888	1.69524	2.57327
Ier2	-3.24932	-0.924665	0.284572	0.526803	1.89824	2.57327
Zfp292	-3.2478	-0.361017	0.111157	0.778616	1.28433	2.57327
Brwd1	-3.24751	-0.30608	0.0942506	0.808837	1.23634	2.57327
Tns3	-3.24584	-0.360527	0.111074	0.77888	1.28389	2.57327
Lurap1l	-3.24102	-0.4182	0.129033	0.748358	1.33626	2.57327
Tex26	-3.23971	-0.359181	0.110868	0.779607	1.2827	2.57327
Cyp4f13	-3.238	-0.539256	0.16654	0.688125	1.45322	2.57327
Klf2	-3.2327	-0.82627	0.255597	0.563985	1.7731	2.57327
Col7a1	-3.23099	-1.07477	0.332644	0.474746	2.10639	2.57327
Gm14379	-3.23083	-0.165753	0.0513035	0.891463	1.12175	2.57327
Abhd11os	-3.22879	-0.155348	0.0481135	0.897916	1.11369	2.57327
Tmem229b	-3.22708	-0.455434	0.141129	0.729291	1.3712	2.57327
Coasy	-3.22691	-0.198398	0.0614822	0.871518	1.14742	2.57327
Acbd6	-3.2252	-0.553617	0.171654	0.68131	1.46776	2.57327
Card6	-3.22364	-0.179342	0.0556334	0.883106	1.13237	2.57327
Zc3h10	-3.22307	-0.295485	0.0916782	0.814798	1.2273	2.57327
4930481A15Rik	-3.22289	-0.412698	0.128052	0.751217	1.33117	2.57327
Gm29766	-3.21825	-0.297729	0.0925126	0.813532	1.22921	2.57327
Hist2h4	-3.21479	-0.232847	0.0724299	0.850954	1.17515	2.57327
Pbxip1	-3.21465	-0.213386	0.0663792	0.86251	1.15941	2.57327
4833439L19Rik	-3.21311	-0.307473	0.0956935	0.808056	1.23754	2.57327
Idua	-3.21302	-0.288152	0.0896826	0.81895	1.22108	2.57327
Psmf1	-3.21201	-0.340981	0.106158	0.789504	1.26662	2.57327
Pakap	-3.21133	-0.776914	0.241929	0.583614	1.71346	2.57327
Fos	-3.21132	-1.07935	0.336108	0.473242	2.11308	2.57327
Zfp935	-3.20969	-0.381654	0.118907	0.767557	1.30283	2.57327
Brsk1	-3.20937	-0.314084	0.0978648	0.804361	1.24322	2.57327
Tfdp2	-3.20753	-0.398771	0.124324	0.758504	1.31838	2.57327
Zbtb37	-3.20483	-0.473334	0.147694	0.720298	1.38831	2.57327
BC035532	-3.20263	-0.242041	0.0755759	0.845548	1.18266	2.57327
Klc4	-3.19324	-0.362154	0.113413	0.778002	1.28534	2.57327
Trim26	-3.19317	-0.238897	0.0748149	0.847393	1.18009	2.57327
Dusp28	-3.18664	-0.348307	0.109302	0.785505	1.27307	2.57327
Arhgap24	-3.18071	-0.267281	0.0840317	0.830884	1.20354	2.57327
Usp42	-3.18017	-0.284244	0.08938	0.821172	1.21777	2.57327
Sin3b	-3.17898	-0.368603	0.11595	0.774532	1.2911	2.57327
Frzb	-3.17856	-0.585442	0.184185	0.666445	1.5005	2.57327
Igfbp2	-3.17661	-0.488654	0.153829	0.71269	1.40314	2.57327
D2hgdh	-3.1731	-0.324543	0.102279	0.798552	1.25227	2.57327
Snapin	-3.17162	-0.484532	0.152771	0.714729	1.39913	2.57327
Msn	-3.17022	-0.538639	0.169906	0.68842	1.4526	2.57327
Slc52a2	-3.16947	-0.349188	0.110172	0.785026	1.27384	2.57327
Mapk13	-3.16921	-0.517974	0.163439	0.698352	1.43194	2.57327
AK133808	-3.16366	-0.27937	0.0883062	0.823951	1.21367	2.57327
Plcd3	-3.16247	-0.326691	0.103302	0.797363	1.25413	2.57327
Cav1	-3.16024	-0.59345	0.187786	0.662756	1.50885	2.57327
St7l	-3.15841	-0.229263	0.0725881	0.85307	1.17224	2.57327
S100a10	-3.15686	-0.21391	0.0677605	0.862197	1.15983	2.57327
Lox	-3.15544	-0.264444	0.0838059	0.832519	1.20117	2.57327
Cyb561a3	-3.15416	-0.375096	0.118921	0.771054	1.29693	2.57327
Zfp287	-3.15358	-0.190775	0.0604949	0.876135	1.14138	2.57327
Apcdd1	-3.15348	-0.474903	0.150597	0.719515	1.38982	2.57327
Arid2	-3.15138	-0.291803	0.0925951	0.816881	1.22417	2.57327
Dyrk2	-3.14766	-0.502136	0.159527	0.706061	1.41631	2.57327
Zfp212	-3.14599	-0.391923	0.124579	0.762113	1.31214	2.57327
Gtpbp6	-3.14428	-0.456294	0.145119	0.728856	1.37201	2.57327
Micu2	-3.1431	-0.260158	0.0827711	0.834997	1.19761	2.57327
Zxda	-3.14213	-0.206909	0.0658498	0.866392	1.15421	2.57327
Fam32a	-3.14174	-0.256374	0.0816026	0.837189	1.19447	2.57327
Kcnab1	-3.13976	-0.448995	0.143003	0.732553	1.36509	2.57327
Acvr2b	-3.1368	-0.297395	0.0948083	0.813721	1.22892	2.57327
Timp3	-3.13635	-0.492634	0.157073	0.710726	1.40701	2.57327
Rgl3	-3.13618	-0.299408	0.0954691	0.812586	1.23064	2.57327
Polr1c	-3.13409	-0.495095	0.157971	0.709515	1.40941	2.57327
Rps15a-ps4	-3.13346	-0.484954	0.154766	0.71452	1.39954	2.57327
AK003103	-3.13198	-0.146208	0.0466821	0.903623	1.10666	2.57327
Rarres2	-3.13136	-0.617807	0.197297	0.651661	1.53454	2.57327
AK040320	-3.12354	-0.536332	0.171706	0.689522	1.45028	2.57327
Zfp174	-3.12165	-0.272342	0.087243	0.827974	1.20777	2.57327
Tmem219	-3.11963	-0.430338	0.137945	0.742088	1.34755	2.57327
Hbegf	-3.11909	-1.26913	0.406893	0.414909	2.41017	2.57327
Nexn	-3.1177	-0.501434	0.160835	0.706404	1.41562	2.57327
Pdgfa	-3.11202	-0.368631	0.118454	0.774517	1.29113	2.57327
Arhgef26	-3.10629	-0.449933	0.144846	0.732077	1.36598	2.57327
Gm15772	-3.10566	-0.455498	0.146667	0.729258	1.37126	2.57327
Ascc1	-3.10486	-0.424339	0.136669	0.74518	1.34196	2.57327
Zxdb	-3.10225	-0.442532	0.142649	0.735842	1.35899	2.57327
Dgcr8	-3.10155	-0.32309	0.10417	0.799356	1.25101	2.57327
Zfp109	-3.10131	-0.291123	0.093871	0.817266	1.22359	2.57327
AK040173	-3.10033	-0.411068	0.132588	0.752067	1.32967	2.57327
Ap4b1	-3.09805	-0.210954	0.0680926	0.863966	1.15745	2.57327
Sox11	-3.09506	-0.460431	0.148763	0.726769	1.37595	2.57327
H2-T23	-3.09448	-0.818305	0.26444	0.567108	1.76333	2.57327
Avil	-3.09438	-0.430839	0.139233	0.74183	1.34802	2.57327
Furin	-3.09276	-0.501691	0.162215	0.706279	1.41587	2.57327
Rdm1	-3.09215	-0.400361	0.129477	0.757669	1.31984	2.57327
AK170517	-3.09114	-0.329732	0.10667	0.795684	1.25678	2.57327
Wisp1	-3.08976	-0.353564	0.114431	0.782648	1.27771	2.57327
AK037592	-3.08943	-0.20172	0.0652937	0.869513	1.15007	2.57327
Plxnb1	-3.08942	-0.236193	0.0764521	0.848983	1.17788	2.57327
Npdc1	-3.08693	-0.303189	0.098217	0.810459	1.23387	2.57327
Ccdc24	-3.08616	-0.325737	0.105548	0.797891	1.2533	2.57327
Tctn1	-3.08468	-0.183678	0.0595453	0.880455	1.13578	2.57327
Bloc1s1	-3.08141	-0.520835	0.169025	0.696968	1.43479	2.57327
Tmub1	-3.08127	-0.37486	0.121657	0.77118	1.29671	2.57327
Inpp5a	-3.08059	-0.581077	0.188625	0.668465	1.49597	2.57327
AK195756	-3.0804	-0.347098	0.112679	0.786164	1.272	2.57327
Ptpn9	-3.07952	-0.239065	0.0776306	0.847294	1.18023	2.57327
Vdr	-3.07748	-0.614431	0.199654	0.653187	1.53095	2.57327
Mirlet7bhg	-3.07646	-0.512073	0.166449	0.701214	1.4261	2.57327
Uggt2	-3.07464	-0.31153	0.101322	0.805787	1.24102	2.57327
Tctex1d2	-3.0714	-0.244258	0.0795267	0.84425	1.18448	2.57327
AK043285	-3.07094	-0.261105	0.0850243	0.834449	1.1984	2.57327
Lrrc4c	-3.07066	-0.963893	0.313905	0.512671	1.95057	2.57327
A430105I19Rik	-3.06434	-0.597535	0.194996	0.660882	1.51313	2.57327
R3hdm4	-3.06389	-0.262511	0.0856788	0.833636	1.19956	2.57327
Oplah	-3.06389	-0.45489	0.148468	0.729566	1.37068	2.57327
Smim14	-3.06241	-0.414343	0.1353	0.750361	1.33269	2.57327
BC051212	-3.06189	-0.728435	0.237904	0.603558	1.65684	2.57327
Npnt	-3.06173	-0.701325	0.229062	0.615007	1.626	2.57327
Nenf	-3.06104	-0.399177	0.130406	0.758291	1.31876	2.57327
Tmem203	-3.06055	-0.423575	0.138398	0.745575	1.34125	2.57327
Chst11	-3.0593	-0.729767	0.238541	0.603001	1.65837	2.57327
Cdyl2	-3.05922	-0.361626	0.118209	0.778287	1.28487	2.57327
Mex3a	-3.05649	-0.406724	0.133069	0.754334	1.32567	2.57327
Wnk1	-3.05435	-0.319408	0.104575	0.801399	1.24782	2.57327
Ssu72	-3.05406	-0.254481	0.0833257	0.838288	1.19291	2.57327
Rps24	-3.04985	-0.295617	0.0969285	0.814724	1.22741	2.57327
Fam120b	-3.04902	-0.205461	0.0673859	0.867261	1.15305	2.57327
Ezh1	-3.04856	-0.324474	0.106435	0.798589	1.25221	2.57327
AK035466	-3.0476	-0.217239	0.0712821	0.86021	1.16251	2.57327
Sdpr	-3.04573	-0.553807	0.181831	0.68122	1.46795	2.57327
Uckl1	-3.04502	-0.316068	0.103799	0.803256	1.24493	2.57327
Grem2	-3.04169	-0.739091	0.242987	0.599117	1.66912	2.57327
Hip1r	-3.03871	-0.586017	0.19285	0.66618	1.5011	2.57327
2900005J15Rik	-3.03861	-0.242488	0.0798023	0.845286	1.18303	2.57327
Lamc3	-3.03709	-0.295431	0.0972746	0.814829	1.22725	2.57327
Ppp1r18	-3.03272	-0.398589	0.131429	0.7586	1.31822	2.57327
Pja2	-3.03199	-0.158909	0.0524108	0.895702	1.11644	2.57327
Snx21	-3.02869	-0.239312	0.0790148	0.847149	1.18043	2.57327
Mir17hg	-3.02593	-0.383046	0.126588	0.766817	1.30409	2.57327
Fhl5	-3.0245	-0.317023	0.104818	0.802725	1.24576	2.57327
Actg2	-3.02271	-1.42876	0.472677	0.371449	2.69216	2.57327
Sema4f	-3.02248	-0.347101	0.11484	0.786162	1.272	2.57327
Echdc3	-3.01799	-0.482083	0.159737	0.715943	1.39676	2.57327
Tpbg	-3.01646	-0.265279	0.0879438	0.832038	1.20187	2.57327
Ppdpf	-3.00998	-0.418412	0.139008	0.748248	1.33646	2.57327
Cdk5rap3	-3.00972	-0.28463	0.0945702	0.820952	1.2181	2.57327
Ddx6	-3.00677	-0.224972	0.0748219	0.855612	1.16875	2.57327
Rnf31	-3.00287	-0.419871	0.139823	0.747492	1.33781	2.57327
Pqlc1	-3.00281	-0.755635	0.251642	0.592286	1.68837	2.57327
Rxfp3	-3.00273	-0.325364	0.108356	0.798097	1.25298	2.57327
AK053109	-3.00173	-0.735322	0.244966	0.600684	1.66477	2.57327
Serpinb2	-3.00009	-0.177957	0.0593173	0.883954	1.13128	2.57327
Tbc1d23	-3.00007	-0.387497	0.129163	0.764455	1.30812	2.57327
Pigv	-2.99969	-0.317076	0.105703	0.802695	1.2458	2.57327
Hacl1	-2.99593	-0.354263	0.118248	0.782269	1.27833	2.57327
B3galt4	-2.99453	-0.459546	0.153462	0.727215	1.37511	2.57327
Myh11	-2.99383	-0.913858	0.305247	0.530764	1.88408	2.57327
Pip4k2a	-2.99314	-0.210946	0.0704765	0.86397	1.15745	2.57327
Lztr1	-2.99313	-0.309831	0.103514	0.806736	1.23956	2.57327
AK192647	-2.99236	-0.865485	0.289231	0.548862	1.82195	2.57327
Cln6	-2.99031	-0.391394	0.130887	0.762393	1.31166	2.57327
Frat1	-2.98743	-0.538855	0.180374	0.688317	1.45282	2.57327
Gm5617	-2.98672	-0.72332	0.242179	0.605702	1.65098	2.57327
AK015956	-2.98468	-0.334612	0.11211	0.792997	1.26104	2.57327
Rps6ka5	-2.98437	-0.597912	0.200348	0.660709	1.51352	2.57327
E4f1	-2.98365	-0.232392	0.0778886	0.851222	1.17478	2.57327
Foxo3	-2.97966	-0.455139	0.152749	0.72944	1.37091	2.57327
AK217931	-2.97954	-0.810668	0.272079	0.570118	1.75402	2.57327
Dancr	-2.97603	-0.403895	0.135716	0.755815	1.32308	2.57327
Ccdc17	-2.9704	-0.63233	0.212877	0.645134	1.55007	2.57327
Fgfr1	-2.97002	-0.505871	0.170326	0.704235	1.41998	2.57327
Osmr	-2.96954	-0.553299	0.186325	0.68146	1.46744	2.57327
9930021J03Rik	-2.9692	-0.183459	0.0617871	0.880589	1.1356	2.57327
DQ727060	-2.96603	-0.448245	0.151126	0.732934	1.36438	2.57327
Slc4a3	-2.9656	-0.361835	0.122011	0.778174	1.28506	2.57327
Fbxo8	-2.96216	-0.30493	0.102942	0.809482	1.23536	2.57327
Rad51d	-2.96168	-0.49106	0.165805	0.711502	1.40548	2.57327
Ptgs2	-2.96028	-1.31639	0.444683	0.401539	2.49042	2.57327
Glipr1	-2.9595	-0.308692	0.104305	0.807373	1.23858	2.57327
Kifc2	-2.95853	-0.258894	0.0875077	0.835728	1.19656	2.57327
Adck3	-2.95649	-0.618126	0.209074	0.651516	1.53488	2.57327
Nell2	-2.95432	-0.221948	0.0751265	0.857407	1.16631	2.57327
Rasa2	-2.95308	-0.426956	0.14458	0.74383	1.34439	2.57327
Rps19-ps3	-2.95125	-0.534693	0.181175	0.690306	1.44863	2.57327
Peo1	-2.94751	-0.332423	0.112781	0.794201	1.25913	2.57327
Serpinb6a	-2.94557	-0.239952	0.0814622	0.846773	1.18095	2.57327
Phldb1	-2.94541	-0.623235	0.211595	0.649214	1.54032	2.57327
Spry1	-2.9445	-0.708198	0.240516	0.612084	1.63376	2.57327
Shroom3	-2.94056	-0.324373	0.11031	0.798646	1.25212	2.57327
Cript	-2.94055	-0.265939	0.0904385	0.831657	1.20242	2.57327
Epc2	-2.93983	-0.214126	0.0728361	0.862068	1.16	2.57327
Fam129c	-2.93482	-0.339856	0.115801	0.79012	1.26563	2.57327
Sh3d21	-2.93273	-0.774724	0.264165	0.5845	1.71086	2.57327
Gm527	-2.93139	-0.412849	0.140838	0.751138	1.33131	2.57327
Exoc3l4	-2.93135	-0.195191	0.0665874	0.873457	1.14488	2.57327
Fam19a5	-2.92894	-0.506512	0.172934	0.703922	1.42061	2.57327
Gabarapl1	-2.92844	-0.361443	0.123425	0.778386	1.28471	2.57327
Mettl4	-2.92507	-0.253014	0.0864982	0.839142	1.19169	2.57327
0610030E20Rik	-2.92486	-0.199149	0.0680882	0.871064	1.14802	2.57327
Ccpg1os	-2.92465	-0.724772	0.247815	0.605093	1.65264	2.57327
Nptx2	-2.92395	-0.429283	0.146816	0.742631	1.34656	2.57327
Rock2	-2.92367	-0.408364	0.139675	0.753477	1.32718	2.57327
Fam107b	-2.922	-0.535244	0.183177	0.690042	1.44919	2.57327
Nr4a3	-2.92095	-0.369281	0.126425	0.774168	1.29171	2.57327
Mbtps2	-2.92089	-0.284663	0.0974577	0.820933	1.21813	2.57327
Dhx34	-2.919	-0.562049	0.192548	0.67734	1.47636	2.57327
5830444B04Rik	-2.91751	-0.317537	0.108838	0.802439	1.2462	2.57327
Zfp622	-2.91534	-0.365186	0.125264	0.776369	1.28805	2.57327
Dusp4	-2.91321	-1.47426	0.506061	0.359917	2.77842	2.57327
Fbf1	-2.9104	-0.378889	0.130185	0.76903	1.30034	2.57327
Nedd4	-2.90776	-0.275424	0.09472	0.826208	1.21035	2.57327
Angptl7	-2.90661	-1.20912	0.415991	0.432531	2.31197	2.57327
Trappc5	-2.90481	-0.240483	0.0827877	0.846462	1.18139	2.57327
Fibp	-2.90055	-0.349061	0.120343	0.785095	1.27373	2.57327
Pofut2	-2.90054	-0.221946	0.0765188	0.857408	1.16631	2.57327
Jrkl	-2.8988	-0.284438	0.0981225	0.821062	1.21794	2.57327
Has1	-2.89243	-0.329771	0.114012	0.795663	1.25681	2.57327
Athl1	-2.89066	-0.381608	0.132014	0.767582	1.30279	2.57327
AK036614	-2.88968	-0.187234	0.0647942	0.878288	1.13858	2.57327
Zfp871	-2.88941	-0.238891	0.0826782	0.847397	1.18009	2.57327
Pycr1	-2.88866	-0.424625	0.146997	0.745032	1.34222	2.57327
Fam83h	-2.88728	-0.37327	0.129281	0.772031	1.29529	2.57327
AK084170	-2.88359	-0.221971	0.0769775	0.857393	1.16633	2.57327
Txndc17	-2.88275	-0.154123	0.0534641	0.898678	1.11275	2.57327
Chst2	-2.88136	-0.637487	0.221245	0.642832	1.55562	2.57327
Eva1a	-2.87684	-0.854643	0.297077	0.553002	1.80831	2.57327
Nuak2	-2.87607	-0.933278	0.324498	0.523667	1.90961	2.57327
Zfp451	-2.87545	-0.359655	0.125078	0.779351	1.28312	2.57327
Pkp2	-2.86958	-0.733192	0.255505	0.601572	1.66231	2.57327
B230219D22Rik	-2.86809	-0.241372	0.0841577	0.84594	1.18212	2.57327
Tnnt2	-2.86767	-0.839212	0.292646	0.558949	1.78907	2.57327
Zbtb8a	-2.86509	-0.266412	0.0929856	0.831384	1.20281	2.57327
Bbs12	-2.8619	-0.268677	0.0938806	0.83008	1.2047	2.57327
Polr1d	-2.85918	-0.212611	0.0743609	0.862974	1.15878	2.57327
Cmip	-2.85788	-0.322362	0.112797	0.79976	1.25038	2.57327
Chml	-2.85458	-0.206527	0.0723491	0.866621	1.15391	2.57327
Fnbp1l	-2.85309	-0.249972	0.0876144	0.840913	1.18918	2.57327
Frmd6	-2.85262	-0.602885	0.211345	0.658436	1.51875	2.57327
Pttg1ip	-2.85068	-0.168131	0.0589793	0.889995	1.1236	2.57327
Atg101	-2.85042	-0.329655	0.115651	0.795727	1.25671	2.57327
Fam84a	-2.85012	-0.19956	0.0700182	0.870816	1.14835	2.57327
1700123M08Rik	-2.84954	-0.387815	0.136097	0.764286	1.30841	2.57327
Sptbn1	-2.84941	-0.339813	0.119257	0.790144	1.26559	2.57327
Kirrel3	-2.84902	-0.291523	0.102324	0.817039	1.22393	2.57327
S100a7a	-2.84788	-0.885377	0.31089	0.541346	1.84725	2.57327
Hoxb3	-2.84565	-0.133408	0.0468814	0.911675	1.09688	2.57327
Cds2	-2.84512	-0.197159	0.0692972	0.872267	1.14644	2.57327
Mbtd1	-2.84022	-0.19537	0.0687869	0.873349	1.14502	2.57327
Lima1	-2.84021	-0.382821	0.134786	0.766937	1.30389	2.57327
Ankrd16	-2.83773	-0.159094	0.0560637	0.895588	1.11659	2.57327
Axl	-2.83469	-0.622182	0.219489	0.649687	1.5392	2.57327
5033428I22Rik	-2.83436	-0.384227	0.13556	0.76619	1.30516	2.57327
AK080173	-2.83291	-0.415326	0.146607	0.74985	1.3336	2.57327
Hoxc11	-2.83263	-0.363951	0.128485	0.777034	1.28695	2.57327
Eif5a2	-2.83215	-0.308082	0.10878	0.807715	1.23806	2.57327
Sdr39u1	-2.83105	-0.157736	0.0557165	0.896431	1.11554	2.57327
Hmga1-rs1	-2.831	-1.29512	0.457477	0.407502	2.45397	2.57327
Clip1	-2.83043	-0.399561	0.141166	0.758089	1.31911	2.57327
Frmpd1	-2.828	-0.422315	0.149334	0.746226	1.34008	2.57327
Phyhd1	-2.82708	-0.584661	0.206807	0.666806	1.49969	2.57327
Smarcd1	-2.82606	-0.184005	0.0651101	0.880256	1.13603	2.57327
Irak1	-2.821	-0.14868	0.0527047	0.902076	1.10855	2.74502
Zfp84	-2.82064	-0.147404	0.0522591	0.902873	1.10757	2.74502
Igfbp5	-2.81971	-0.530353	0.188088	0.692385	1.44428	2.74502
Bves	-2.8169	-0.152781	0.0542372	0.899515	1.11171	2.74502
Rsrp1	-2.81611	-0.411622	0.146167	0.751778	1.33018	2.74502
Mfge8	-2.81568	-0.202455	0.0719029	0.86907	1.15066	2.74502
Otud7b	-2.81452	-0.296007	0.105171	0.814504	1.22774	2.74502
Ube2r2	-2.81303	-0.31777	0.112964	0.802309	1.2464	2.74502
AK007436	-2.81254	-0.487855	0.173457	0.713084	1.40236	2.74502
Ccdc65	-2.81059	-0.356112	0.126704	0.781267	1.27997	2.74502
Rheb	-2.81043	-0.257313	0.0915563	0.836645	1.19525	2.74502
Gpr39	-2.81	-0.349956	0.12454	0.784608	1.27452	2.74502
Hes1	-2.80965	-0.184204	0.0655613	0.880134	1.13619	2.74502
Kank2	-2.80879	-0.419295	0.14928	0.74779	1.33727	2.74502
Lad1	-2.8067	-0.254185	0.0905638	0.83846	1.19266	2.74502
Flt1	-2.80659	-0.417956	0.14892	0.748484	1.33603	2.74502
Xntrpc	-2.80612	-0.331477	0.118126	0.794722	1.2583	2.74502
Pde7b	-2.80595	-0.222699	0.0793667	0.856961	1.16691	2.74502
Fancc	-2.80142	-0.254729	0.0909287	0.838144	1.19311	2.74502
Plcxd2	-2.80019	-0.173534	0.0619721	0.886668	1.12782	2.74502
Fcho2	-2.80011	-0.352422	0.12586	0.783268	1.2767	2.74502
Zfp637	-2.80001	-0.271732	0.097047	0.828324	1.20726	2.74502
Pmp2	-2.79957	-0.57082	0.203896	0.673234	1.48537	2.74502
C230037L18Rik	-2.79796	-0.306863	0.109674	0.808398	1.23702	2.74502
Arsk	-2.79647	-0.206311	0.0737755	0.866751	1.15373	2.74502
Midn	-2.7958	-0.366453	0.131073	0.775687	1.28918	2.74502
Firre	-2.79147	-0.913222	0.327147	0.530998	1.88325	2.74502
Kctd10	-2.78987	-0.307429	0.110195	0.808081	1.2375	2.74502
Plekhg2	-2.78961	-0.472165	0.169259	0.720882	1.38719	2.74502
Cadm3	-2.78711	-0.783893	0.281257	0.580797	1.72177	2.74502
Meg3	-2.78347	-0.835949	0.300327	0.560214	1.78503	2.74502
Taf4a	-2.7784	-0.228031	0.0820729	0.853799	1.17124	2.74502
Auh	-2.77697	-0.376543	0.135595	0.770281	1.29823	2.74502
4833422C13Rik	-2.77576	-0.573453	0.206593	0.672006	1.48808	2.74502
Myom1	-2.77528	-0.25288	0.0911186	0.839219	1.19158	2.74502
Lrrc15	-2.77324	-0.743042	0.267933	0.597478	1.6737	2.74502
Tceal3	-2.77311	-0.323879	0.116793	0.798919	1.25169	2.74502
Hspb6	-2.77265	-0.439896	0.158655	0.737188	1.35651	2.74502
AK214184	-2.77081	-0.377603	0.136279	0.769715	1.29918	2.74502
Adamtsl4	-2.7698	-0.479124	0.172982	0.717413	1.3939	2.74502
Ntpcr	-2.76868	-0.34158	0.123373	0.789177	1.26714	2.74502
Endov	-2.76769	-0.307366	0.111055	0.808116	1.23745	2.74502
Corin	-2.76694	-0.282694	0.102169	0.822054	1.21646	2.74502
Fgd3	-2.76657	-1.24711	0.450776	0.421293	2.37365	2.74502
Abhd4	-2.76414	-0.241046	0.0872047	0.846132	1.18185	2.74502
Fstl1	-2.76287	-0.245811	0.0889695	0.843341	1.18576	2.74502
Paics	-2.76191	-0.358406	0.129767	0.780026	1.28201	2.74502
Zfp518b	-2.76154	-0.304284	0.110186	0.809844	1.23481	2.74502
Sp140	-2.76138	-0.364264	0.131914	0.776865	1.28722	2.74502
Tmem136	-2.75981	-0.456894	0.165553	0.728553	1.37258	2.74502
Ecm1	-2.75529	-0.549761	0.199529	0.683133	1.46384	2.74502
AK086441	-2.75497	-0.201774	0.0732399	0.869481	1.15011	2.74502
Cxx1c	-2.7547	-0.321094	0.116562	0.800463	1.24928	2.74502
2810403A07Rik	-2.75387	-0.263323	0.095619	0.833167	1.20024	2.74502
Actn4	-2.75005	-0.432937	0.157429	0.740752	1.34998	2.74502
Tet2	-2.74886	-0.22133	0.0805169	0.857774	1.16581	2.74502
Tbc1d17	-2.74882	-0.173533	0.0631301	0.886669	1.12782	2.74502
Chrnb1	-2.74868	-0.220712	0.0802972	0.858142	1.16531	2.74502
Nhs	-2.74843	-0.440535	0.160286	0.736861	1.35711	2.74502
Nek8	-2.74762	-0.257187	0.0936037	0.836718	1.19515	2.74502
Faxc	-2.7466	-0.157286	0.0572659	0.89671	1.11519	2.74502
Pcif1	-2.74625	-0.291917	0.106297	0.816816	1.22427	2.74502
Dtx3l	-2.746	-0.431278	0.157057	0.741605	1.34843	2.74502
Adamtsl3	-2.74545	-0.664987	0.242215	0.630694	1.58555	2.74502
Asb2	-2.74478	-0.212178	0.0773023	0.863233	1.15844	2.74502
A730017L22Rik	-2.74471	-0.380722	0.138711	0.768053	1.30199	2.74502
Zfp281	-2.74241	-0.47698	0.173927	0.71848	1.39183	2.74502
Zfand1	-2.74116	-0.324922	0.118535	0.798341	1.2526	2.74502
Psmb9	-2.73991	-0.398332	0.145382	0.758735	1.31798	2.74502
Zfand3	-2.73801	-0.234503	0.0856473	0.849978	1.1765	2.74502
Hsp90ab1	-2.73731	-0.251777	0.0919797	0.839861	1.19067	2.74502
Fbxo27	-2.73639	-0.386532	0.141256	0.764966	1.30725	2.74502
Fam149b	-2.73558	-0.257632	0.0941784	0.83646	1.19551	2.74502
Zfp704	-2.73409	-0.475261	0.173828	0.719337	1.39017	2.74502
Chmp2a	-2.73324	-0.247987	0.0907299	0.842071	1.18755	2.74502
Elac1	-2.73286	-0.219826	0.0804379	0.858669	1.16459	2.74502
Myeov2	-2.73259	-0.215772	0.0789623	0.861085	1.16132	2.74502
AK157568	-2.73022	-0.484545	0.177475	0.714723	1.39914	2.74502
2310061I04Rik	-2.72847	-0.211258	0.0774271	0.863784	1.1577	2.74502
Frs2	-2.72805	-0.273775	0.100356	0.827152	1.20897	2.74502
Dlc1	-2.72626	-0.489581	0.17958	0.712232	1.40404	2.74502
Zfp36	-2.72594	-0.945598	0.346889	0.519214	1.92599	2.74502
Nras	-2.72355	-0.298632	0.109648	0.813023	1.22998	2.74502
Tcp11	-2.72346	-0.136189	0.0500058	0.90992	1.099	2.74502
Galnt2	-2.72263	-0.24032	0.0882673	0.846558	1.18125	2.74502
Sbno2	-2.72196	-0.427083	0.156903	0.743764	1.34451	2.74502
Tbx6	-2.72041	-0.532622	0.195788	0.691297	1.44656	2.74502
Cd109	-2.71787	-0.21087	0.0775866	0.864016	1.15739	2.74502
Gemin7	-2.71713	-0.254928	0.0938226	0.838029	1.19328	2.74502
Shf	-2.71604	-0.31003	0.114148	0.806625	1.23973	2.74502
Papss2	-2.71474	-0.333543	0.122864	0.793585	1.2601	2.74502
AK017280	-2.71108	-0.390453	0.144021	0.76289	1.3108	2.74502
Usp30	-2.70736	-0.256805	0.0948545	0.836939	1.19483	2.74502
Zfp949	-2.70534	-0.396143	0.14643	0.759887	1.31598	2.74502
Ankzf1	-2.70343	-0.357859	0.132372	0.780322	1.28152	2.74502
Ndufa7	-2.70275	-0.250796	0.0927929	0.840433	1.18986	2.74502
Fam3c	-2.70089	-0.210056	0.0777728	0.864504	1.15673	2.74502
Mrpl52	-2.69888	-0.377983	0.140052	0.769513	1.29952	2.74502
Dnase1l2	-2.69856	-0.176668	0.0654676	0.884744	1.13027	2.74502
Mttp	-2.69855	-0.354815	0.131484	0.78197	1.27882	2.74502
Katnbl1	-2.69718	-0.246735	0.0914787	0.842802	1.18652	2.74502
Rrnad1	-2.69558	-0.22458	0.0833142	0.855844	1.16844	2.74502
Hoxa1	-2.69543	-0.158264	0.0587158	0.896102	1.11594	2.74502
Sfn	-2.69538	-0.537288	0.199336	0.689065	1.45124	2.74502
Foxn3	-2.69531	-0.426095	0.158087	0.744274	1.34359	2.74502
Letmd1	-2.69494	-0.288413	0.10702	0.818802	1.2213	2.74502
Prr33	-2.69477	-0.580902	0.215567	0.668546	1.49578	2.74502
Fam174a	-2.69464	-0.53917	0.20009	0.688167	1.45314	2.74502
Jak3	-2.69318	-0.447025	0.165984	0.733554	1.36323	2.74502
Ginm1	-2.68954	-0.355329	0.132115	0.781691	1.27928	2.74502
Smr3a	-2.68871	-0.651222	0.242207	0.636741	1.5705	2.74502
Cpxm2	-2.68868	-0.481557	0.179106	0.716204	1.39625	2.74502
Mtap	-2.68785	-0.357383	0.132962	0.780579	1.2811	2.74502
AK009335	-2.68773	-0.195687	0.0728076	0.873157	1.14527	2.74502
Angptl4	-2.68677	-0.523623	0.194889	0.695623	1.43756	2.74502
Cxxc4	-2.68654	-0.292974	0.109053	0.816218	1.22516	2.74502
AK014660	-2.68584	-0.375332	0.139745	0.770928	1.29714	2.74502
Kcnmb1	-2.68575	-0.368922	0.137363	0.774361	1.29139	2.74502
Nadsyn1	-2.6857	-0.310309	0.115541	0.806469	1.23997	2.74502
Rtn4r	-2.68514	-0.553499	0.206134	0.681366	1.46764	2.74502
Lama5	-2.68377	-0.247436	0.0921972	0.842392	1.1871	2.74502
Klk8	-2.68291	-0.517858	0.193021	0.698408	1.43183	2.74502
Ablim3	-2.68279	-0.157989	0.0588899	0.896273	1.11573	2.74502
Zfp781	-2.68259	-0.207044	0.0771806	0.86631	1.15432	2.74502
Sdc2	-2.67987	-0.432368	0.161339	0.741045	1.34945	2.74502
Dbndd1	-2.67966	-0.282878	0.105565	0.82195	1.21662	2.74502
Hspa2	-2.67758	-0.473999	0.177025	0.719966	1.38895	2.74502
Impad1	-2.67482	-0.263819	0.0986303	0.832881	1.20065	2.74502
BC049762	-2.67384	-0.24147	0.0903086	0.845883	1.1822	2.74502
Trpv2	-2.67367	-0.334045	0.124939	0.793309	1.26054	2.74502
Npr2	-2.67163	-0.286189	0.107122	0.820066	1.21941	2.74502
Src	-2.6688	-0.35618	0.133461	0.78123	1.28003	2.74502
Wbscr17	-2.66486	-0.584827	0.219459	0.666729	1.49986	2.74502
Tead3	-2.66406	-0.343979	0.129118	0.787866	1.26925	2.74502
3110043O21Rik	-2.66221	-0.251298	0.0943945	0.84014	1.19028	2.74502
Rad9b	-2.66204	-0.242973	0.0912731	0.845002	1.18343	2.74502
AK154275	-2.66154	-0.152734	0.0573857	0.899544	1.11167	2.74502
Timp1	-2.66133	-0.897785	0.337344	0.53671	1.8632	2.74502
Hist2h2be	-2.65862	-0.239775	0.090188	0.846877	1.18081	2.74502
Man2c1	-2.65622	-0.24896	0.0937273	0.841503	1.18835	2.74502
AK141706	-2.656	-0.303644	0.114324	0.810203	1.23426	2.74502
Trim24	-2.65356	-0.319287	0.120324	0.801466	1.24771	2.74502
Itgb3	-2.65098	-0.455036	0.171648	0.729492	1.37082	2.74502
Ppp1r16a	-2.6488	-0.199766	0.0754173	0.870692	1.14851	2.74502
Mvb12b	-2.64737	-0.20691	0.0781566	0.866391	1.15421	2.74502
AK166469	-2.64685	-0.126825	0.0479156	0.915845	1.09189	2.74502
Slc10a3	-2.64401	-0.187957	0.071088	0.877848	1.13915	2.74502
Aldh6a1	-2.64348	-0.329463	0.124632	0.795832	1.25655	2.74502
Psrc1	-2.6433	-0.376157	0.142306	0.770487	1.29788	2.74502
Cxcl1	-2.64158	-0.562313	0.21287	0.677216	1.47663	2.74502
Sft2d3	-2.64116	-0.399159	0.15113	0.7583	1.31874	2.74502
Hist2h2ac	-2.64084	-0.374131	0.141671	0.77157	1.29606	2.74502
St5	-2.64068	-0.240018	0.0908926	0.846735	1.18101	2.74502
AK020648	-2.63569	-0.299402	0.113595	0.812589	1.23063	2.74502
S100a11	-2.6313	-0.411093	0.156232	0.752053	1.32969	2.74502
Nlrx1	-2.63036	-0.256292	0.0974362	0.837237	1.19441	2.74502
Msi1	-2.62967	-0.415849	0.158138	0.749578	1.33408	2.74502
Hoxa7	-2.62934	-0.254821	0.0969143	0.838091	1.19319	2.74502
2010320M18Rik	-2.62877	-0.179713	0.0683638	0.882879	1.13266	2.74502
Aup1	-2.62858	-0.229522	0.0873177	0.852918	1.17245	2.74502
Gnat2	-2.62578	-0.26424	0.100633	0.832637	1.201	2.74502
Slc50a1	-2.62353	-0.343622	0.130977	0.78806	1.26894	2.74502
Gyg	-2.6234	-0.684682	0.26099	0.622143	1.60735	2.74502
Mxi1	-2.62237	-0.331089	0.126256	0.794936	1.25796	2.74502
9330151L19Rik	-2.62072	-0.221872	0.0846608	0.857452	1.16625	2.74502
Runx2	-2.61987	-0.500244	0.190943	0.706987	1.41445	2.74502
Tmem220	-2.61715	-0.431647	0.16493	0.741415	1.34877	2.74502
Zfp874b	-2.6123	-0.209183	0.0800761	0.865027	1.15603	2.74502
Sh3bp4	-2.61024	-0.44211	0.169375	0.736057	1.35859	2.74502
AK008044	-2.60926	-0.22618	0.0866836	0.854896	1.16973	2.74502
Zkscan4	-2.60796	-0.260186	0.0997659	0.83498	1.19763	2.74502
Stard13	-2.60732	-0.343504	0.131746	0.788125	1.26883	2.74502
Dnajc30	-2.60731	-0.402502	0.154375	0.756545	1.3218	2.74502
Polr2l	-2.60667	-0.371658	0.14258	0.772894	1.29384	2.74502
Qsox2	-2.60561	-0.178748	0.0686012	0.883469	1.1319	2.74502
Pygb	-2.60485	-0.403083	0.154743	0.75624	1.32233	2.74502
Syn1	-2.60349	-0.622368	0.239051	0.649604	1.5394	2.74502
Galnt7	-2.60243	-0.381139	0.146455	0.767831	1.30237	2.74502
Taf4b	-2.60217	-0.188976	0.0726226	0.877228	1.13995	2.74502
Fgf10	-2.60177	-0.343787	0.132136	0.78797	1.26908	2.74502
Fdx1l	-2.60047	-0.586798	0.225651	0.665819	1.50191	2.74502
Itga11	-2.59736	-0.482006	0.185575	0.715981	1.39668	2.74502
Slc22a15	-2.59649	-0.248454	0.0956884	0.841798	1.18793	2.74502
Tox3	-2.59545	-0.22492	0.0866592	0.855642	1.16871	2.74502
5830454E08Rik	-2.59385	-0.287011	0.110651	0.819598	1.22011	2.74502
Zfp523	-2.59326	-0.275348	0.106179	0.826251	1.21029	2.74502
Spp1	-2.59278	-0.42618	0.164372	0.74423	1.34367	2.74502
Zfp715	-2.59244	-0.426967	0.164697	0.743824	1.3444	2.74502
Tef	-2.59148	-0.143309	0.0552999	0.90544	1.10444	2.74502
Cracr2b	-2.59059	-0.343709	0.132676	0.788013	1.26901	2.74502
Cpn2	-2.58967	-0.261449	0.100959	0.834249	1.19868	2.74502
Dmd	-2.58698	-0.667488	0.258018	0.629602	1.58831	2.74502
Ubxn2a	-2.58654	-0.308205	0.119157	0.807646	1.23817	2.74502
Dok1	-2.58572	-0.740252	0.286285	0.598635	1.67047	2.74502
Dedd2	-2.58471	-0.202608	0.078387	0.868978	1.15078	2.74502
Zfp58	-2.58323	-0.298496	0.115551	0.8131	1.22986	2.74502
Cd59b	-2.58185	-0.421778	0.163363	0.746504	1.33958	2.74502
Atl3	-2.57896	-0.204484	0.0792894	0.867849	1.15227	2.74502
Taf1a	-2.57894	-0.226147	0.0876898	0.854915	1.16971	2.74502
1110007C09Rik	-2.57865	-0.169345	0.065672	0.889246	1.12455	2.74502
Sos2	-2.5786	-0.298315	0.115689	0.813201	1.22971	2.74502
Ubxn7	-2.57785	-0.262862	0.10197	0.833433	1.19986	2.74502
Ppt1	-2.57761	-0.226502	0.0878727	0.854705	1.16999	2.74502
Cdhr4	-2.57736	-0.325042	0.126114	0.798275	1.2527	2.74502
AK087382	-2.5764	-0.148316	0.0575672	0.902303	1.10828	2.74502
Dcaf8	-2.57573	-0.221354	0.0859382	0.85776	1.16583	2.74502
Flnb	-2.57492	-0.670659	0.260458	0.628219	1.5918	2.74502
Zfp105	-2.57399	-0.387829	0.150672	0.764279	1.30842	2.74502
Arhgap39	-2.5706	-0.275119	0.107025	0.826382	1.21009	2.74502
Lamb3	-2.57013	-0.335033	0.130356	0.792766	1.26141	2.74502
Nol4l	-2.56852	-0.361561	0.140767	0.778322	1.28482	2.74502
R3hcc1	-2.5656	-0.263128	0.10256	0.833279	1.20008	3.64955
D3Ertd254e	-2.56452	-0.238458	0.0929834	0.847651	1.17973	3.64955
Atp13a3	-2.56338	-0.400112	0.156087	0.7578	1.31961	3.64955
Rab8b	-2.56287	-0.333738	0.13022	0.793478	1.26027	3.64955
Ppp2cb	-2.56241	-0.243117	0.0948785	0.844918	1.18355	3.64955
Baz2b	-2.55949	-0.258129	0.100852	0.836172	1.19593	3.64955
Chst14	-2.55907	-0.245935	0.096103	0.843269	1.18586	3.64955
AK149799	-2.55705	-0.161323	0.0630896	0.894205	1.11831	3.64955
Pdlim5	-2.55512	-0.382213	0.149587	0.76726	1.30334	3.64955
Unc50	-2.55252	-0.179501	0.0703232	0.883008	1.13249	3.64955
Smpd5	-2.55009	-0.27364	0.107306	0.827229	1.20885	3.64955
Ppib	-2.54962	-0.142583	0.0559231	0.905896	1.10388	3.64955
Car8	-2.54959	-0.511006	0.200427	0.701733	1.42504	3.64955
Slc39a10	-2.54863	-0.199528	0.0782885	0.870835	1.14832	3.64955
Iscu	-2.54615	-0.175863	0.06907	0.885238	1.12964	3.64955
Slc35a5	-2.5454	-0.212468	0.0834712	0.86306	1.15867	3.64955
B3gnt2	-2.54425	-0.224243	0.088137	0.856044	1.16816	3.64955
Yipf3	-2.54181	-0.357693	0.140724	0.780411	1.28138	3.64955
Ccnt2	-2.54173	-0.325909	0.128223	0.797796	1.25345	3.64955
Nkain3	-2.54136	-0.296571	0.116698	0.814185	1.22822	3.64955
Gm13986	-2.54089	-0.282471	0.11117	0.822182	1.21628	3.64955
Cage1	-2.54004	-0.238803	0.0940158	0.847448	1.18001	3.64955
Ino80d	-2.538	-0.144266	0.0568426	0.904839	1.10517	3.64955
AK086087	-2.53729	-0.466308	0.183782	0.723814	1.38157	3.64955
Ctsw	-2.53703	-0.587955	0.231749	0.665285	1.50311	3.64955
Smoc1	-2.53181	-0.288768	0.114056	0.818601	1.2216	3.64955
Amn1	-2.53143	-0.472095	0.186493	0.720917	1.38712	3.64955
Tmem260	-2.53129	-0.213121	0.0841949	0.862669	1.15919	3.64955
Slu7	-2.53101	-0.246771	0.0974993	0.84278	1.18655	3.64955
Llgl2	-2.53088	-0.433442	0.171261	0.740493	1.35045	3.64955
Gm17746	-2.53069	-0.321605	0.127082	0.800179	1.24972	3.64955
Adprh	-2.53001	-0.263333	0.104084	0.833161	1.20025	3.64955
Actb	-2.52956	-0.341348	0.134944	0.789303	1.26694	3.64955
AK006576	-2.52774	-0.248783	0.0984212	0.841606	1.1882	3.64955
Sp7	-2.52712	-1.26265	0.499641	0.416777	2.39937	3.64955
Stoml1	-2.52508	-0.375941	0.148883	0.770603	1.29769	3.64955
A530013C23Rik	-2.5229	-0.155856	0.0617767	0.897599	1.11408	3.64955
Pcgf3	-2.52281	-0.216384	0.0857709	0.86072	1.16182	3.64955
Tcea2	-2.51949	-0.518319	0.205724	0.698185	1.43229	3.64955
St6galnac3	-2.51941	-0.139404	0.0553321	0.907894	1.10145	3.64955
Cplx2	-2.51765	-0.371737	0.147652	0.772852	1.29391	3.64955
Snrk	-2.51695	-0.361511	0.143631	0.778349	1.28477	3.64955
Gm3230	-2.51689	-0.189103	0.0751336	0.877151	1.14005	3.64955
Lgals4	-2.51108	-0.308936	0.123029	0.807237	1.23879	3.64955
Suv420h1	-2.50989	-0.258692	0.103069	0.835845	1.19639	3.64955
Clcf1	-2.50803	-0.713118	0.284334	0.61	1.63934	3.64955
Sspn	-2.50802	-0.582511	0.232259	0.6678	1.49745	3.64955
Rhou	-2.50763	-0.199593	0.0795944	0.870796	1.14837	3.64955
Zfp810	-2.5075	-0.476732	0.190122	0.718603	1.39159	3.64955
Pcdhga7	-2.50701	-0.166205	0.066296	0.891184	1.1221	3.64955
Fam129b	-2.50589	-0.387397	0.154594	0.764508	1.30803	3.64955
Rab5a	-2.50553	-0.268443	0.10714	0.830215	1.20451	3.64955
Ctdsp2	-2.50301	-0.323278	0.129156	0.799252	1.25117	3.64955
Cacna2d1	-2.49971	-0.138977	0.0555971	0.908163	1.10112	3.64955
AK165776	-2.49912	-0.170462	0.0682088	0.888558	1.12542	3.64955
Rgs4	-2.49816	-0.417439	0.167099	0.748752	1.33555	3.64955
Nrn1l	-2.49782	-0.36989	0.148085	0.773842	1.29225	3.64955
Dhx57	-2.49683	-0.274091	0.109776	0.826971	1.20923	3.64955
Fbxo44	-2.49639	-0.150734	0.060381	0.900792	1.11013	3.64955
Tubb5	-2.49316	-0.353951	0.141969	0.782438	1.27806	3.64955
Spin1	-2.49284	-0.209724	0.0841304	0.864703	1.15647	3.64955
Lrp6	-2.49259	-0.364914	0.1464	0.776515	1.2878	3.64955
Tmem231	-2.49215	-0.268355	0.10768	0.830266	1.20443	3.64955
Cfap126	-2.49125	-0.390382	0.156701	0.762928	1.31074	3.64955
Fhl4	-2.4908	-0.388419	0.155941	0.763966	1.30896	3.64955
Rmdn1	-2.49001	-0.23325	0.0936746	0.850716	1.17548	3.64955
Wdr5b	-2.4887	-0.224358	0.0901508	0.855976	1.16826	3.64955
Trp53cor1	-2.48694	-0.401867	0.161591	0.756878	1.32122	3.64955
Krt8	-2.48646	-0.138045	0.0555189	0.90875	1.10041	3.64955
Vangl2	-2.48638	-0.22591	0.0908589	0.855056	1.16951	3.64955
Dennd4b	-2.48593	-0.341474	0.137362	0.789235	1.26705	3.64955
Ddah1	-2.48367	-0.523947	0.210957	0.695467	1.43788	3.64955
Tfap4	-2.48159	-0.273534	0.110225	0.82729	1.20877	3.64955
Alox5ap	-2.48116	-0.178842	0.0720803	0.883412	1.13198	3.64955
Prelp	-2.4778	-0.347372	0.140194	0.786015	1.27224	3.64955
Fibcd1	-2.47694	-0.171554	0.0692605	0.887886	1.12627	3.64955
Tmem30a	-2.47582	-0.218624	0.0883035	0.859385	1.16362	3.64955
Rbak	-2.47449	-0.191051	0.0772081	0.875967	1.14159	3.64955
Prkd3	-2.47203	-0.227792	0.0921478	0.853941	1.17104	3.64955
AK214683	-2.47074	-0.582992	0.235958	0.667578	1.49795	3.64955
Usf2	-2.47021	-0.264263	0.10698	0.832624	1.20102	3.64955
AK196015	-2.46998	-0.971191	0.393197	0.510085	1.96046	3.64955
Adamts16	-2.46902	-0.189501	0.0767516	0.876909	1.14037	3.64955
Sp4	-2.46631	-0.270907	0.109843	0.828798	1.20657	3.64955
Sidt2	-2.46271	-0.330235	0.134094	0.795407	1.25722	3.64955
AK213609	-2.45846	-0.604742	0.245985	0.657589	1.52071	3.64955
Tmem53	-2.45804	-0.133584	0.0543457	0.911564	1.09702	3.64955
Tfb2m	-2.4578	-0.298965	0.121639	0.812835	1.23026	3.64955
Dcaf12	-2.45737	-0.196884	0.0801198	0.872433	1.14622	3.64955
Snurf	-2.45698	-0.172294	0.0701244	0.88743	1.12685	3.64955
Lrp12	-2.45241	-0.264446	0.107831	0.832518	1.20117	3.64955
Tsc22d1	-2.45233	-0.269689	0.109972	0.829498	1.20555	3.64955
Armc10	-2.45218	-0.347573	0.141741	0.785905	1.27242	3.64955
Ccdc162	-2.45163	-0.262976	0.107266	0.833367	1.19995	3.64955
AK012993	-2.45128	-0.228408	0.0931788	0.853576	1.17154	3.64955
Errfi1	-2.45018	-0.699594	0.285527	0.615746	1.62405	3.64955
Emd	-2.44906	-0.238485	0.0973782	0.847635	1.17975	3.64955
Gm12216	-2.44887	-0.218498	0.089224	0.85946	1.16352	3.64955
Cnnm3	-2.44869	-0.288594	0.117857	0.818699	1.22145	3.64955
Rap1gap2	-2.44664	-0.721852	0.295038	0.606319	1.6493	3.64955
AB346559	-2.44487	-0.372262	0.152262	0.77257	1.29438	3.64955
Sh3glb1	-2.44354	-0.141859	0.0580548	0.90635	1.10333	3.64955
Lrrc51	-2.44348	-0.647938	0.26517	0.638192	1.56693	3.64955
Adarb1	-2.44036	-0.431807	0.176944	0.741333	1.34892	3.64955
Mkrn3	-2.44006	-0.119629	0.049027	0.920425	1.08646	3.64955
Fam109a	-2.43924	-0.310193	0.127168	0.806534	1.23987	3.64955
Tbx3	-2.43906	-0.233761	0.0958406	0.850415	1.1759	3.64955
Gm4890	-2.43893	-0.332301	0.136249	0.794269	1.25902	3.64955
Gm13271	-2.4374	-0.164568	0.0675181	0.892195	1.12083	3.64955
Litaf	-2.43725	-0.151579	0.0621923	0.900265	1.11078	3.64955
Zfp354c	-2.43481	-0.170483	0.0700191	0.888545	1.12544	3.64955
Larp6	-2.43398	-0.280789	0.115362	0.823141	1.21486	3.64955
Tapbp	-2.43328	-0.430427	0.176891	0.742042	1.34763	3.64955
Ldoc1l	-2.43291	-0.224468	0.092263	0.855911	1.16835	3.64955
Lrrfip1	-2.432	-0.232602	0.0956422	0.851098	1.17495	3.64955
Ccdc80	-2.43168	-0.282315	0.116099	0.822271	1.21614	3.64955
Tpst2	-2.42766	-0.380832	0.156872	0.767995	1.30209	3.64955
Doc2g	-2.42656	-0.541976	0.223351	0.68683	1.45597	3.64955
Mlycd	-2.42575	-0.120085	0.0495046	0.920133	1.0868	3.64955
Cmtm6	-2.42544	-0.172157	0.0709799	0.887515	1.12674	3.64955
Slc25a27	-2.42405	-0.34005	0.140282	0.790014	1.2658	3.64955
1700009N14Rik	-2.42224	-0.333354	0.137622	0.793689	1.25994	3.64955
Gzme	-2.42206	-0.845919	0.349256	0.556356	1.79741	3.64955
AB341725	-2.42104	-0.262308	0.108345	0.833753	1.1994	3.64955
Fat1	-2.42096	-0.241002	0.0995481	0.846157	1.18181	3.64955
Daam1	-2.41881	-0.193996	0.0802029	0.874181	1.14393	3.64955
Fam195b	-2.4181	-0.379815	0.157072	0.768536	1.30118	3.64955
Rc3h1	-2.4173	-0.177017	0.0732295	0.88453	1.13054	3.64955
Gpr162	-2.41523	-0.485109	0.200854	0.714443	1.39969	3.64955
Ckmt1	-2.41486	-0.449687	0.186217	0.732202	1.36574	3.64955
AK137436	-2.41473	-0.329155	0.136312	0.796002	1.25628	3.64955
Usp11	-2.41358	-0.205868	0.0852958	0.867017	1.15338	3.64955
Fem1c	-2.41327	-0.258978	0.107314	0.83568	1.19663	3.64955
Smr2	-2.41323	-0.232371	0.0962902	0.851235	1.17476	3.64955
Fbxl4	-2.41217	-0.277759	0.115149	0.824871	1.21231	3.64955
Pnpla8	-2.40749	-0.332581	0.138144	0.794115	1.25926	3.64955
Fut8	-2.40673	-0.259844	0.107965	0.835178	1.19735	3.64955
Ndor1	-2.40441	-0.30521	0.126938	0.809324	1.2356	3.64955
Parp6	-2.40334	-0.223226	0.0928814	0.856648	1.16734	3.64955
Rfesd	-2.40332	-0.315085	0.131104	0.803803	1.24409	3.64955
Morn1	-2.40159	-0.305351	0.127146	0.809245	1.23572	3.64955
Acot11	-2.39614	-0.374194	0.156166	0.771536	1.29612	3.64955
4930486L24Rik	-2.39251	-0.8224	0.34374	0.5655	1.76835	3.64955
Fbxo36	-2.39023	-0.79289	0.331721	0.577187	1.73254	3.64955
Arhgef19	-2.38939	-0.252261	0.105576	0.839579	1.19107	3.64955
Xk	-2.38882	-0.238605	0.0998838	0.847565	1.17985	3.64955
Pced1a	-2.38864	-0.292506	0.122457	0.816482	1.22477	3.64955
Heatr5a	-2.38741	-0.30987	0.129793	0.806714	1.2396	3.64955
Gfpt2	-2.38623	-0.115156	0.0482585	0.923283	1.08309	3.64955
Ikzf5	-2.38531	-0.1475	0.061837	0.902813	1.10765	3.64955
Rtcb	-2.38403	-0.121408	0.0509254	0.91929	1.0878	3.64955
E130102H24Rik	-2.38228	-0.657724	0.27609	0.633877	1.57759	3.64955
Sp3os	-2.37916	-0.502333	0.211139	0.705964	1.4165	3.64955
Slc6a6	-2.37861	-0.653258	0.274638	0.635843	1.57272	3.64955
Zfhx3	-2.37643	-0.353508	0.148756	0.782679	1.27766	3.64955
Il10rb	-2.37571	-0.258752	0.108916	0.83581	1.19644	3.64955
Gm4925	-2.37537	-0.29795	0.125433	0.813408	1.2294	3.64955
Mysm1	-2.37528	-0.235767	0.0992587	0.849233	1.17753	3.64955
AK137356	-2.37521	-0.401616	0.169087	0.75701	1.32099	3.64955
Lin7c	-2.37388	-0.367131	0.154655	0.775323	1.28979	3.64955
Herpud2	-2.3734	-0.27049	0.113967	0.829038	1.20622	3.64955
Ssh1	-2.37062	-0.490097	0.206738	0.711977	1.40454	3.64955
Eif2a	-2.36855	-0.300726	0.126966	0.811844	1.23176	3.64955
Nr4a1	-2.36733	-0.42472	0.179408	0.744984	1.34231	3.64955
Pgm2l1	-2.36683	-0.245951	0.103916	0.84326	1.18587	3.64955
Tfeb	-2.36489	-0.158861	0.0671747	0.895732	1.11641	3.64955
Bace1	-2.36433	-0.190248	0.0804659	0.876455	1.14096	3.64955
Cox6b2	-2.36388	-0.645677	0.273143	0.639193	1.56447	3.64955
Slc16a6	-2.36151	-0.367924	0.1558	0.774897	1.29049	3.64955
Ppm1j	-2.36064	-0.619081	0.262251	0.651085	1.5359	3.64955
Slc9a3r2	-2.36006	-0.16269	0.0689348	0.893358	1.11937	3.64955
Ubl7	-2.36001	-0.290307	0.123011	0.817728	1.2229	3.64955
AK219587	-2.3593	-0.465659	0.197372	0.72414	1.38095	3.64955
AK220028	-2.35908	-1.00788	0.427233	0.497278	2.01095	3.64955
Pla2g4a	-2.35801	-0.293628	0.124523	0.815848	1.22572	3.64955
Chsy1	-2.35787	-0.273892	0.116161	0.827086	1.20906	3.64955
Hoxd11	-2.35583	-0.364813	0.154855	0.77657	1.28771	3.64955
Nudt8	-2.35581	-0.448766	0.190493	0.732669	1.36487	3.64955
Ptpn12	-2.35332	-0.207126	0.0880143	0.866261	1.15439	3.64955
Itga2	-2.35217	-0.219595	0.0933586	0.858806	1.16441	3.64955
Itm2c	-2.34955	-0.140993	0.0600085	0.906895	1.10266	3.64955
Eid2	-2.34955	-0.155935	0.0663682	0.89755	1.11414	3.64955
Tvp23b	-2.34889	-0.263761	0.112292	0.832914	1.2006	3.64955
Thap3	-2.34858	-0.375291	0.159795	0.77095	1.2971	3.64955
Parn	-2.34833	-0.28621	0.121878	0.820054	1.21943	3.64955
Arel1	-2.34354	-0.239862	0.102351	0.846826	1.18088	3.64955
AB351656	-2.34163	-0.464204	0.19824	0.724871	1.37956	3.64955
Zfp94	-2.34105	-0.210243	0.0898074	0.864391	1.15688	3.64955
Blcap	-2.33796	-0.181269	0.0775332	0.881927	1.13388	3.64955
Cradd	-2.33784	-0.365001	0.156127	0.776468	1.28788	3.64955
AK079730	-2.33666	-0.199605	0.0854233	0.870789	1.14838	3.64955
S1pr1	-2.33589	-0.24525	0.104992	0.843669	1.1853	3.64955
Ikzf2	-2.33567	-0.287114	0.122926	0.81954	1.2202	3.64955
Kmt2a	-2.33513	-0.424716	0.181881	0.744985	1.34231	3.64955
Mkl1	-2.33471	-0.529114	0.226629	0.69298	1.44304	3.64955
AK158346	-2.33373	-0.146146	0.0626235	0.903661	1.10661	3.64955
Pigp	-2.33065	-0.341081	0.146346	0.78945	1.26671	3.64955
Zmym6	-2.3298	-0.183453	0.0787423	0.880593	1.1356	3.64955
Etv6	-2.32773	-0.281839	0.121079	0.822542	1.21574	3.64955
Eif2b2	-2.32653	-0.238872	0.102673	0.847408	1.18007	5.06423
Ldhd	-2.32506	-0.245306	0.105505	0.843637	1.18534	5.06423
Pou2f1	-2.32452	-0.40029	0.172203	0.757706	1.31977	5.06423
Fam210b	-2.32452	-0.230583	0.0991962	0.85229	1.17331	5.06423
Zfp36l1	-2.32385	-0.183326	0.0788889	0.88067	1.1355	5.06423
Fmod	-2.32348	-0.498012	0.214339	0.708082	1.41227	5.06423
Efna4	-2.32101	-0.250071	0.107742	0.840855	1.18927	5.06423
Vps54	-2.31973	-0.1992	0.0858721	0.871033	1.14806	5.06423
Mafk	-2.31919	-0.442066	0.190612	0.73608	1.35855	5.06423
Lrrc46	-2.31598	-0.251072	0.108409	0.840272	1.19009	5.06423
Ankrd23	-2.31564	-0.298859	0.129061	0.812895	1.23017	5.06423
Gm14440	-2.31332	-0.31109	0.134477	0.806033	1.24064	5.06423
Gm15612	-2.3133	-0.173067	0.074814	0.886955	1.12745	5.06423
Sgpl1	-2.31307	-0.22023	0.095211	0.858429	1.16492	5.06423
Zim1	-2.31134	-0.299382	0.129527	0.8126	1.23062	5.06423
Pik3r5	-2.31091	-0.314728	0.136192	0.804002	1.24378	5.06423
Tmem234	-2.31036	-0.184195	0.0797255	0.88014	1.13618	5.06423
Chic1	-2.30862	-0.154972	0.0671277	0.89815	1.1134	5.06423
Per2	-2.30672	-0.184909	0.0801612	0.879704	1.13675	5.06423
Syngr2	-2.30647	-0.218079	0.094551	0.859709	1.16318	5.06423
Arl2	-2.30593	-0.309498	0.134218	0.806922	1.23928	5.06423
Trim45	-2.30562	-0.277798	0.120487	0.824849	1.21234	5.06423
Gemin8	-2.30442	-0.285468	0.123878	0.820476	1.21881	5.06423
Ptk7	-2.30415	-0.250114	0.108549	0.84083	1.1893	5.06423
Smim15	-2.30243	-0.265154	0.115162	0.83211	1.20176	5.06423
Iqcc	-2.30109	-0.190975	0.0829932	0.876013	1.14154	5.06423
Pdlim7	-2.29929	-0.506711	0.220377	0.703825	1.42081	5.06423
BC027275	-2.29921	-0.372503	0.162013	0.772441	1.2946	5.06423
Sh2d5	-2.29839	-0.136339	0.0593194	0.909825	1.09911	5.06423
Grin3a	-2.29701	-0.117942	0.0513458	0.921501	1.08519	5.06423
Rc3h2	-2.29427	-0.136819	0.059635	0.909522	1.09948	5.06423
Lrrtm2	-2.28982	-0.291224	0.127182	0.817209	1.22368	5.06423
Invs	-2.28836	-0.163901	0.0716235	0.892608	1.12031	5.06423
Prdm2	-2.28816	-0.223379	0.0976241	0.856557	1.16746	5.06423
Rsbn1l	-2.28753	-0.321374	0.14049	0.800307	1.24952	5.06423
4930414L22Rik	-2.28555	-0.2682	0.117346	0.830355	1.2043	5.06423
Lef1	-2.28505	-0.770138	0.337033	0.586361	1.70543	5.06423
AK087024	-2.28466	-0.161187	0.070552	0.894289	1.11821	5.06423
Eef1d	-2.28383	-0.254071	0.111248	0.838527	1.19257	5.06423
Thap6	-2.28314	-0.335449	0.146924	0.792538	1.26177	5.06423
Il6	-2.28297	-0.378134	0.165632	0.769432	1.29966	5.06423
Kctd1	-2.28163	-0.310144	0.135931	0.806561	1.23983	5.06423
Irf3	-2.27905	-0.249475	0.109464	0.841203	1.18877	5.06423
AK020320	-2.27711	-0.31718	0.13929	0.802637	1.24589	5.06423
2410021H03Rik	-2.2767	-0.106558	0.0468036	0.928801	1.07666	5.06423
Hipk1	-2.27537	-0.182837	0.0803547	0.880969	1.13511	5.06423
Kansl3	-2.27232	-0.227711	0.100211	0.853989	1.17098	5.06423
Inafm2	-2.27204	-0.320373	0.141007	0.800863	1.24865	5.06423
Vps37c	-2.27184	-0.157844	0.0694784	0.896364	1.11562	5.06423
Adam11	-2.27181	-0.107897	0.0474941	0.927939	1.07766	5.06423
BC002288	-2.27156	-0.153879	0.0677415	0.898831	1.11256	5.06423
Gjb5	-2.26917	-0.811305	0.357535	0.569866	1.7548	5.06423
Lpar6	-2.26885	-0.361553	0.159356	0.778326	1.28481	5.06423
Lrriq3	-2.2676	-0.252428	0.11132	0.839482	1.19121	5.06423
Rin2	-2.26273	-0.473285	0.209166	0.720323	1.38827	5.06423
Naglu	-2.26111	-0.219967	0.0972828	0.858585	1.16471	5.06423
Phlda3	-2.2611	-0.30176	0.133457	0.811262	1.23265	5.06423
Dpy19l4	-2.25837	-0.312226	0.138253	0.805398	1.24162	5.06423
Ctnnd1	-2.25822	-0.23967	0.106132	0.846939	1.18072	5.06423
Pomgnt2	-2.25809	-0.214171	0.0948459	0.862042	1.16004	5.06423
Tha1	-2.25572	-0.302123	0.133937	0.811058	1.23296	5.06423
Fam229b	-2.25457	-0.43768	0.19413	0.738321	1.35442	5.06423
Insr	-2.25022	-0.199047	0.0884566	0.871126	1.14794	5.06423
Mfsd4	-2.24883	-0.291205	0.129491	0.817219	1.22366	5.06423
Misp	-2.248	-0.164742	0.0732839	0.892088	1.12097	5.06423
Tns1	-2.24727	-0.412925	0.183745	0.751099	1.33138	5.06423
Dguok	-2.24639	-0.262439	0.116827	0.833677	1.1995	5.06423
Atad3aos	-2.23771	-0.336206	0.150245	0.792122	1.26243	5.06423
D030025P21Rik	-2.23554	-0.479645	0.214555	0.717154	1.3944	5.06423
Nupr1l	-2.23535	-0.241067	0.107843	0.846119	1.18187	5.06423
5930430L01Rik	-2.2353	-0.263715	0.117978	0.83294	1.20057	5.06423
Smim8	-2.23193	-0.366531	0.164222	0.775646	1.28925	5.06423
Tnfrsf25	-2.23185	-0.174513	0.0781924	0.886066	1.12858	5.06423
Cyp4a12b	-2.23109	-0.533547	0.239142	0.690854	1.44748	5.06423
Klf8	-2.22918	-0.26112	0.117137	0.83444	1.19841	5.06423
Bcl9	-2.22854	-0.274398	0.123129	0.826795	1.20949	5.06423
Fam208a	-2.22704	-0.165836	0.0744646	0.891412	1.12182	5.06423
Man1a2	-2.22645	-0.147761	0.0663664	0.90265	1.10785	5.06423
Fam71e1	-2.22592	-0.556504	0.250011	0.679948	1.4707	5.06423
Fxyd5	-2.22509	-0.340783	0.153155	0.789612	1.26644	5.06423
Cfap69	-2.22457	-0.286587	0.128828	0.819839	1.21975	5.06423
Bet1l	-2.22454	-0.152932	0.0687476	0.899421	1.11183	5.06423
Lonp2	-2.22393	-0.171776	0.0772397	0.887749	1.12644	5.06423
D130020L05Rik	-2.22343	-0.249065	0.112018	0.841442	1.18844	5.06423
Aif1l	-2.2228	-0.480568	0.216199	0.716696	1.39529	5.06423
Zfp867	-2.22214	-0.240516	0.108236	0.846442	1.18142	5.06423
Fan1	-2.22156	-0.207489	0.0933977	0.866043	1.15468	5.06423
Vcam1	-2.22152	-0.212744	0.095765	0.862894	1.15889	5.06423
Sdcbp2	-2.22096	-0.406827	0.183176	0.754281	1.32577	5.06423
Lrrc75b	-2.22059	-0.194375	0.087533	0.873952	1.14423	5.06423
Gjb3	-2.22056	-0.840126	0.37834	0.558595	1.79021	5.06423
AK051864	-2.21928	-0.191778	0.0864145	0.875526	1.14217	5.06423
Tspyl1	-2.21482	-0.234132	0.105712	0.850196	1.1762	5.06423
Dsel	-2.21162	-0.162957	0.0736823	0.893192	1.11958	5.06423
Dnajb13	-2.21116	-0.146673	0.0663328	0.903332	1.10701	5.06423
Rara	-2.21071	-0.378674	0.171291	0.769144	1.30015	5.06423
Tmed7	-2.20897	-0.169323	0.0766528	0.88926	1.12453	5.06423
Ahnak2	-2.20642	-0.328104	0.148704	0.796583	1.25536	5.06423
Asxl1	-2.20534	-0.197111	0.0893791	0.872296	1.1464	5.06423
Ppp1r26	-2.20466	-0.324117	0.147014	0.798787	1.2519	5.06423
Anxa13	-2.20442	-0.137227	0.0622511	0.909265	1.09979	5.06423
Hscb	-2.20264	-0.544353	0.247137	0.685699	1.45837	5.06423
1810021B22Rik	-2.20194	-0.495905	0.225213	0.709117	1.41021	5.06423
Nol8	-2.20188	-0.257729	0.11705	0.836403	1.1956	5.06423
Lhx9	-2.19933	-0.675397	0.307091	0.62616	1.59704	5.06423
Usp35	-2.19892	-0.35025	0.159283	0.784448	1.27478	5.06423
Pdpr	-2.19776	-0.403456	0.183576	0.756045	1.32267	5.06423
Slc2a10	-2.19623	-0.230105	0.104773	0.852573	1.17292	5.06423
2900009J06Rik	-2.19613	-0.484259	0.220505	0.714864	1.39887	5.06423
Cd2bp2	-2.19552	-0.18736	0.0853372	0.878212	1.13868	5.06423
[truncated: 7,853 more rows]
