# Supplementary material for: Tsc2 disruption in mesenchymal progenitors results in tumors with vascular anomalies overexpressing Lgals3
Source: eLife. 2017 Jul 11;6:e23202. doi: 10.7554/eLife.23202 (PMC5505700; doi:10.7554/eLife.23202)
Supplement: Figure 4—source data 3. — Gene expression changes in WT fibroblasts treated with sirolimus or vehicle. DOI: http://dx.doi.org/10.7554/eLife.23202.025 [file elife-23202-fig4-data3.xls]

## Sheet: Sheet1
Sirolimus-treated WT fibroblasts (FDR<10%)
Red overexpressed in Sirolimus WT vs Vehicle WT Fibroblasts, Blue Overexpressed in Vehicle WT vs Sirolimus-treated WT
Gene ID	Score(d)	Numerator(r)	Denominator(s+s0)	Fold Change	Fold Change (Treated / Vehicle)	q-value(%)
AB352974	-10.1438	-0.567653	0.0559604	0.674713	1.48211	2.14438
Igbp1	-10.1313	-0.633788	0.0625575	0.644482	1.55163	2.14438
Mterf4	-8.84021	-0.683963	0.0773696	0.622453	1.60655	2.14438
Dusp6	-8.73559	-0.590537	0.0676013	0.664096	1.50581	2.14438
Dapk3	-8.17585	-0.411475	0.0503281	0.751854	1.33004	2.91904
Hist1h2ai	-8.02882	-0.988606	0.123132	0.503964	1.98427	2.91904
Klhl38	-7.8842	-0.5628	0.0713832	0.676987	1.47713	2.91904
4833422C13Rik	-7.87949	-0.659497	0.083698	0.633099	1.57953	2.91904
NADH-cytochrome b5 reductase	-7.86146	-0.942896	0.119939	0.520188	1.92238	2.91904
Gltscr2	-7.56961	-0.714422	0.0943803	0.609449	1.64083	2.91904
Pim3	-7.38109	-0.528805	0.0716432	0.693129	1.44273	2.91904
1500012F01Rik	-7.19889	-0.863181	0.119905	0.549739	1.81904	2.91904
AK171855	-7.17842	-0.552685	0.0769925	0.68175	1.46681	2.91904
AK201904	-7.16877	-1.68688	0.235309	0.310598	3.21959	2.91904
Pigl	-7.14924	-0.444791	0.0622152	0.734691	1.36112	2.91904
C430002N11Rik	-7.08608	-1.28879	0.181876	0.409295	2.44322	2.91904
Asnsd1	-7.05426	-0.467128	0.0662193	0.723403	1.38236	2.91904
Mir703	-6.88262	-0.867776	0.126082	0.547991	1.82485	2.91904
Zswim4	-6.71218	-0.486391	0.072464	0.713808	1.40094	2.91904
St6gal1	-6.54142	-0.374475	0.0572468	0.771386	1.29637	3.58323
Tgfb1	-6.46554	-1.019	0.157606	0.493457	2.02652	3.58323
Wdr45	-6.42079	-0.5677	0.0884159	0.674692	1.48216	3.58323
Wnt9a	-6.38201	-0.374254	0.0586421	0.771504	1.29617	3.58323
Lrrc32	-6.37683	-1.2529	0.196478	0.419603	2.3832	3.58323
Bckdha	-6.3666	-0.704802	0.110703	0.613527	1.62992	3.58323
Peg13	-6.34525	-0.59209	0.0933123	0.663381	1.50743	3.58323
Mustn1	-6.3062	-1.03708	0.164454	0.487312	2.05207	3.58323
Tspan4	-6.23568	-0.547412	0.0877871	0.684247	1.46146	3.58323
Irgm1	-6.19049	-0.60078	0.0970488	0.659397	1.51654	3.58323
Kxd1	-6.0829	-0.649423	0.106762	0.637535	1.56854	3.58323
Yipf4	-6.0667	-0.363058	0.0598445	0.777515	1.28615	3.58323
AB904934	-6.04854	-0.588747	0.0973371	0.66492	1.50394	3.58323
Egr1	-5.95369	-0.731585	0.122879	0.602242	1.66046	3.58323
Qars	-5.91759	-0.324758	0.0548802	0.798432	1.25245	3.58323
Ttc33	-5.89654	-0.382364	0.0648456	0.767179	1.30348	3.58323
Csrp2	-5.85835	-0.882646	0.150665	0.542372	1.84375	3.58323
AK215772	-5.8528	-0.622775	0.106406	0.64942	1.53983	3.58323
Crispld2	-5.82105	-0.499858	0.0858707	0.707177	1.41407	3.58323
Cxcl14	-5.79707	-2.24644	0.387513	0.210743	4.74511	3.58323
Paqr4	-5.79077	-0.363509	0.0627739	0.777272	1.28655	3.58323
Sun2	-5.69154	-0.544015	0.0955831	0.685859	1.45803	4.98377
Pabpc1	-5.68105	-0.398592	0.0701616	0.758598	1.31822	4.98377
AK090257	-5.53725	-0.467805	0.0844833	0.723064	1.383	4.98377
Eef1a1	-5.53581	-0.521565	0.0942166	0.696616	1.43551	4.98377
Gjb2	-5.50424	-1.22172	0.22196	0.428771	2.33225	4.98377
Eif3f	-5.48978	-0.703882	0.128217	0.613918	1.62888	4.98377
Leng9	-5.47316	-0.481103	0.0879023	0.716429	1.39581	4.98377
Chst1	-5.38237	-0.296693	0.0551231	0.814117	1.22833	4.98377
Stmn2	-5.3716	-1.71642	0.319536	0.304303	3.2862	4.98377
Lmbr1l	-5.36825	-0.458231	0.0853595	0.727878	1.37386	4.98377
Ier2	-5.3491	-0.698917	0.130661	0.616034	1.62329	4.98377
Cxcl16	-5.25873	-0.730235	0.138861	0.602806	1.65891	4.98377
Tcta	-5.22686	-0.328043	0.0627611	0.796616	1.25531	4.98377
Megf10	-5.21378	-0.710682	0.136308	0.611031	1.63658	4.98377
Cct4	-5.19888	-0.447858	0.0861452	0.73313	1.36401	4.98377
Fbxo32	-5.19274	-1.5558	0.299611	0.340139	2.93997	4.98377
Rgs16	-5.17982	-1.32826	0.25643	0.398248	2.511	4.98377
Meis3	-5.17084	-0.301802	0.0583661	0.811239	1.23268	4.98377
Rai14	-5.14063	-0.283068	0.0550648	0.821842	1.21678	4.98377
Cpe	-5.13515	-0.273813	0.0533212	0.827131	1.209	4.98377
F2r	-5.04152	-0.373044	0.0739944	0.772152	1.29508	4.98377
Rpl4	-5.04045	-0.494533	0.0981129	0.709791	1.40886	4.98377
Camk2n1	-5.03843	-0.721581	0.143215	0.606432	1.64899	4.98377
Oxa1l	-4.98049	-0.375562	0.0754068	0.770805	1.29735	5.94964
Ercc1	-4.97497	-0.606893	0.121989	0.656609	1.52298	5.94964
Polr1c	-4.97496	-0.43729	0.0878983	0.73852	1.35406	5.94964
Bgn	-4.96548	-0.407864	0.0821398	0.753739	1.32672	5.94964
Tor4a	-4.94228	-0.31009	0.0627422	0.806592	1.23978	5.94964
Eif3l	-4.93756	-0.296622	0.0600747	0.814156	1.22827	5.94964
Map3k14	-4.88215	-0.47302	0.0968877	0.720455	1.38801	5.94964
Eif3h	-4.84725	-0.446715	0.0921585	0.733712	1.36293	5.94964
Anxa8	-4.84064	-1.16723	0.241132	0.445275	2.24581	5.94964
Dusp4	-4.83534	-0.865993	0.179097	0.548669	1.82259	5.94964
Iqgap1	-4.81371	-0.418049	0.0868453	0.748436	1.33612	5.94964
Shisa4	-4.80809	-0.402334	0.0836787	0.756633	1.32164	5.94964
Cln3	-4.7809	-0.448234	0.0937552	0.732939	1.36437	5.94964
2700060E02Rik	-4.77362	-0.567182	0.118816	0.674934	1.48163	5.94964
Rras	-4.76005	-0.566699	0.119053	0.67516	1.48113	5.94964
Tppp3	-4.74538	-0.989415	0.208501	0.503682	1.98538	5.94964
Sncg	-4.71385	-0.472064	0.100144	0.720932	1.38709	5.94964
AK009121	-4.70978	-0.651033	0.13823	0.636824	1.57029	5.94964
Emp1	-4.69237	-0.32012	0.0682215	0.801003	1.24843	5.94964
Fos	-4.68936	-0.715167	0.152508	0.609135	1.64167	5.94964
Pdgfb	-4.68329	-0.720281	0.153798	0.606979	1.6475	5.94964
Cygb	-4.66773	-0.671476	0.143855	0.627864	1.5927	5.94964
Supt4a	-4.65689	-0.512429	0.110037	0.701041	1.42645	5.94964
Ano1	-4.59178	-0.483931	0.105391	0.715027	1.39855	5.94964
Ccdc28a	-4.57647	-0.332494	0.0726529	0.794162	1.25919	5.94964
Tctex1d2	-4.57424	-0.295916	0.0646918	0.814555	1.22766	5.94964
AK003349	-4.56498	-0.453983	0.099449	0.730025	1.36982	5.94964
Maff	-4.56322	-1.08684	0.238175	0.47079	2.12409	5.94964
Eif4a2	-4.56126	-0.287457	0.0630215	0.819345	1.22049	5.94964
Stk17b	-4.55031	-0.251707	0.0553165	0.839902	1.19062	5.94964
Foxo1	-4.52933	-0.541944	0.119652	0.686845	1.45593	5.94964
Lrrk1	-4.52624	-0.334384	0.0738768	0.793122	1.26084	5.94964
Ginm1	-4.51177	-0.223357	0.0495053	0.85657	1.16745	5.94964
AK145301	-4.51081	-1.04662	0.232025	0.484101	2.06568	5.94964
AK043958	-4.50619	-0.265968	0.0590228	0.831641	1.20244	5.94964
Pfdn5	-4.49856	-0.651688	0.144866	0.636535	1.57101	5.94964
Mrpl23	-4.49294	-0.419362	0.093338	0.747755	1.33734	5.94964
Pabpc4	-4.48735	-0.416634	0.0928462	0.749171	1.33481	5.94964
Trib1	-4.47702	-0.612943	0.136909	0.653861	1.52938	5.94964
Ext1	-4.47441	-0.335291	0.0749352	0.792624	1.26163	5.94964
M1ap	-4.45635	-0.441654	0.0991067	0.73629	1.35816	5.94964
2900052L18Rik	-4.40328	-0.260459	0.0591512	0.834822	1.19786	7.01941
Eif3e	-4.39728	-0.614233	0.139685	0.653277	1.53074	7.01941
Hmga1	-4.39188	-0.77182	0.175738	0.585678	1.70742	7.01941
Myh9	-4.37916	-0.418111	0.0954774	0.748404	1.33618	7.01941
Aimp1	-4.37544	-0.4886	0.111669	0.712716	1.40308	7.01941
Adamts10	-4.33316	-0.329478	0.0760364	0.795825	1.25656	7.01941
Frmpd1	-4.32473	-0.273006	0.0631266	0.827593	1.20832	7.01941
Tmem200a	-4.31818	-0.837708	0.193996	0.559532	1.78721	7.01941
Nr1d2	-4.30709	-0.303066	0.0703644	0.810528	1.23376	7.01941
Serhl	-4.29864	-0.305208	0.071001	0.809326	1.2356	7.01941
Kcnk12	-4.29415	-0.888904	0.207004	0.540024	1.85177	7.01941
Ctdp1	-4.29395	-0.349901	0.081487	0.784638	1.27447	7.01941
Mgll	-4.27811	-0.607264	0.141947	0.656441	1.52337	7.01941
Sdcbp2	-4.27336	-0.391074	0.0915144	0.762562	1.31137	7.01941
Ctsf	-4.26975	-0.535103	0.125324	0.69011	1.44905	7.01941
Ugdh	-4.26304	-0.402663	0.0944545	0.756461	1.32195	7.01941
Eif1	-4.26041	-0.391282	0.0918414	0.762452	1.31156	7.01941
Ctsw	-4.24948	-0.675384	0.158933	0.626165	1.59702	7.01941
Rpl10	-4.24896	-0.544074	0.128049	0.685831	1.45808	7.01941
Ntn4	-4.21589	-0.83325	0.197645	0.561264	1.78169	7.01941
Rpl3	-4.20849	-0.439347	0.104395	0.737468	1.35599	7.01941
Il34	-4.2009	-0.332036	0.0790391	0.794415	1.25879	7.01941
Nfkbia	-4.18641	-0.461932	0.110341	0.726013	1.37739	7.01941
Tubb5	-4.17322	-0.251338	0.0602265	0.840117	1.19031	7.01941
Hyi	-4.15396	-0.473642	0.114022	0.720144	1.38861	7.01941
Cox6b2	-4.15322	-0.362948	0.0873894	0.777574	1.28605	7.01941
Chp1	-4.12896	-0.252318	0.0611094	0.839546	1.19112	7.01941
Lrp11	-4.10615	-0.499614	0.121675	0.707296	1.41384	7.01941
Ccni	-4.09858	-0.594366	0.145018	0.662335	1.50981	7.01941
Rpl22	-4.09676	-0.406172	0.0991449	0.754623	1.32517	7.01941
Map1lc3a	-4.08517	-0.440433	0.107813	0.736914	1.35701	7.01941
Aldh1a3	-4.08175	-1.60206	0.392494	0.329405	3.03577	7.01941
AK203938	-4.07813	-0.989896	0.242733	0.503514	1.98604	7.01941
Pdha1	-4.0773	-0.296534	0.072728	0.814206	1.22819	7.01941
Sirt2	-4.07269	-0.307395	0.0754772	0.8081	1.23747	7.01941
Gpnmb	-4.07101	-0.252245	0.0619614	0.839589	1.19106	7.01941
Kdsr	-4.07045	-0.534716	0.131365	0.690295	1.44866	7.01941
Dnajb9	-4.05886	-0.297739	0.0733552	0.813526	1.22922	7.01941
Phospho1	-4.05728	-0.661872	0.163132	0.632058	1.58213	7.01941
Hspa8	-4.0491	-0.255948	0.0632111	0.837436	1.19412	7.01941
Lrrc51	-4.02251	-0.288699	0.071771	0.81864	1.22154	7.01941
Ubald1	-4.01372	-0.561667	0.139937	0.677519	1.47597	7.01941
Toporsos	-4.00081	-0.410592	0.102627	0.752315	1.32923	7.01941
DQ685776	-3.99819	-0.292856	0.0732472	0.816284	1.22506	7.01941
Grcc10	-3.98571	-0.312526	0.0784117	0.80523	1.24188	7.01941
AK192194	-3.96739	-0.656807	0.165551	0.634281	1.57659	7.01941
Pim1	-3.96588	-1.02482	0.258409	0.491472	2.0347	7.01941
Cpne8	-3.9598	-0.668565	0.168838	0.629132	1.58949	7.01941
2610203C20Rik	-3.95835	-0.776224	0.196098	0.583893	1.71264	7.01941
Frzb	-3.95408	-0.453564	0.114708	0.730237	1.36942	7.01941
Klhdc8a	-3.9326	-0.83657	0.212727	0.559973	1.7858	7.01941
C030006K11Rik	-3.92717	-0.45123	0.114899	0.731419	1.36721	7.01941
Cntf	-3.90668	-0.550216	0.14084	0.682918	1.4643	7.01941
Serpina3g	-3.88744	-0.340377	0.0875581	0.789835	1.26609	8.56764
H2-Ke6	-3.88116	-0.347711	0.0895895	0.78583	1.27254	8.56764
Rarg	-3.88056	-0.197456	0.0508832	0.872087	1.14667	8.56764
Vim	-3.86894	-0.277096	0.0716207	0.825251	1.21175	8.56764
Axl	-3.85298	-0.291679	0.0757022	0.816951	1.22406	8.56764
Gnb2l1	-3.85194	-0.446417	0.115894	0.733863	1.36265	8.56764
Abtb1	-3.84956	-0.4607	0.119676	0.726633	1.37621	8.56764
Junb	-3.849	-0.816877	0.212231	0.56767	1.76159	8.56764
Rnls	-3.83636	-0.185948	0.0484699	0.879071	1.13756	8.56764
AK179207	-3.83167	-0.777223	0.202842	0.583489	1.71383	8.56764
Klhl26	-3.81818	-0.437896	0.114687	0.73821	1.35463	8.56764
Zdhhc1	-3.81223	-0.346581	0.0909127	0.786446	1.27154	8.56764
2310045N01Rik	-3.80492	-0.333945	0.0877666	0.793364	1.26046	8.56764
Grem1	-3.79365	-1.0801	0.284714	0.472995	2.11419	8.56764
Qsox2	-3.79278	-0.185275	0.0488494	0.879482	1.13703	8.56764
Slc6a12	-3.79228	-0.31231	0.082354	0.805351	1.24169	8.56764
Fam195b	-3.79142	-0.269969	0.0712052	0.829338	1.20578	8.56764
Tmem176a	-3.78845	-0.614694	0.162255	0.653068	1.53123	8.56764
Etv4	-3.78596	-0.763092	0.201559	0.589232	1.69712	8.56764
Eef2	-3.78446	-0.629546	0.16635	0.64638	1.54708	8.56764
Adamtsl5	-3.77958	-0.490714	0.129833	0.711673	1.40514	8.56764
Hmga2	-3.77755	-0.756281	0.200204	0.592021	1.68913	8.56764
4930486L24Rik	-3.77289	-0.670452	0.177703	0.62831	1.59157	8.56764
Rpl17	-3.77133	-0.497667	0.13196	0.708251	1.41193	8.56764
Inpp5k	-3.76691	-0.445837	0.118356	0.734158	1.3621	8.56764
Rpl23	-3.75795	-0.458102	0.121902	0.727943	1.37373	8.56764
Serinc3	-3.75146	-0.291563	0.07772	0.817016	1.22397	8.56764
AK148054	-3.74273	-0.532182	0.142191	0.691508	1.44611	8.56764
2200002D01Rik	-3.74242	-0.777552	0.207767	0.583356	1.71422	8.56764
Rps6ka5	-3.74044	-0.310277	0.0829519	0.806487	1.23995	8.56764
Nes	-3.73955	-0.296143	0.079192	0.814427	1.22786	8.56764
Nsa2	-3.73876	-0.392126	0.104881	0.762006	1.31233	8.56764
Rps4x	-3.73815	-0.43458	0.116255	0.739909	1.35152	8.56764
Crlf1	-3.73765	-1.2079	0.323172	0.432898	2.31001	8.56764
Kiz	-3.73317	-0.486484	0.130314	0.713763	1.40103	8.56764
Frat2	-3.73294	-0.785198	0.210343	0.580272	1.72333	8.56764
Atp5sl	-3.70444	-0.293226	0.0791552	0.816075	1.22538	8.56764
Nub1	-3.69842	-0.407172	0.110094	0.7541	1.32608	8.56764
Spop	-3.69285	-0.35956	0.0973665	0.779402	1.28303	8.56764
Lats2	-3.68676	-0.436529	0.118405	0.73891	1.35334	8.56764
Rpl10a	-3.68573	-0.469146	0.127287	0.722392	1.38429	8.56764
Mir143hg	-3.6837	-0.685239	0.186019	0.621903	1.60797	8.56764
Phf1	-3.68232	-0.239277	0.0649798	0.84717	1.1804	8.56764
Kremen1	-3.67541	-0.326449	0.0888198	0.797497	1.25392	8.56764
Epb4.1l2	-3.66704	-0.31755	0.0865958	0.802431	1.24621	8.56764
Lrrk2	-3.6634	-0.321475	0.0877532	0.800251	1.24961	8.56764
Zscan2	-3.65614	-0.19606	0.0536249	0.872931	1.14557	8.56764
Pold4	-3.65337	-0.509613	0.139491	0.702411	1.42367	8.56764
Serf1	-3.64819	-0.294622	0.0807586	0.815286	1.22656	8.56764
Slc10a3-ubl4	-3.63445	-0.365084	0.100451	0.776424	1.28796	8.56764
Rpl37	-3.61621	-0.491423	0.135894	0.711323	1.40583	8.56764
Mrpl24	-3.61105	-0.446914	0.123763	0.73361	1.36312	8.56764
AK181808	-3.61083	-0.446185	0.123568	0.733981	1.36243	8.56764
Klf13	-3.59822	-0.466512	0.129651	0.723712	1.38177	8.56764
Rpl6	-3.59586	-0.505869	0.140681	0.704236	1.41998	8.56764
Kctd2	-3.57962	-0.357296	0.099814	0.780626	1.28102	8.56764
Chmp1b	-3.56769	-0.35444	0.0993473	0.782173	1.27849	8.56764
Nap1l1	-3.56607	-0.423571	0.118778	0.745577	1.34124	8.56764
Plac8	-3.56254	-0.535178	0.150224	0.690074	1.44912	8.56764
Vdr	-3.5313	-0.432736	0.122543	0.740856	1.34979	8.56764
Xpa	-3.52508	-0.415005	0.117729	0.750017	1.3333	8.56764
Rpl15	-3.52313	-0.452598	0.128464	0.730726	1.3685	8.56764
Npm1	-3.49689	-0.481074	0.137572	0.716444	1.39578	8.56764
Cys1	-3.48458	-0.355477	0.102014	0.781611	1.27941	8.56764
0610010B08Rik	-3.48415	-0.562664	0.161493	0.677051	1.47699	8.56764
Abhd14b	-3.4804	-0.322076	0.0925401	0.799918	1.25013	8.56764
Gene ID	Score(d)	Numerator(r)	Denominator(s+s0)	Fold Change		q-value(%)
Trib3	18.5148	1.10467	0.0596639	2.15049		0
Hells	18.2799	1.2116	0.0662807	2.31595		0
Tcf19	17.7064	1.50601	0.0850545	2.84023		0
Ncaph	17.6937	1.28933	0.0728696	2.44415		0
Mybl2	17.5357	1.16535	0.0664558	2.24288		0
Pmf1	16.9329	0.882709	0.0521299	1.84383		0
2810417H13Rik	16.73	1.96378	0.117381	3.90082		0
BC003348	16.7103	1.13425	0.0678771	2.19504		0
Snora28	15.8542	3.41875	0.215638	10.6942		0
Cenph	14.975	1.24806	0.083343	2.37522		0
Cpa6	14.6066	0.888836	0.0608516	1.85168		0
Figf	13.8047	1.4282	0.103457	2.6911		0
Slbp	13.7728	0.741146	0.0538122	1.6715		0
Mns1	13.5227	0.834511	0.0617119	1.78325		0
Rad51ap1	13.2258	1.46818	0.111009	2.76672		0
Dmpk	12.8964	0.857858	0.0665193	1.81235		0
Ube2c	12.5177	1.77659	0.141926	3.42615		0
Acot2	12.4312	0.855718	0.0688365	1.80966		0
Cdk1	12.0412	1.67509	0.139113	3.1934		0
Prc1	11.8561	1.89263	0.159633	3.71311		0
Asf1b	11.4775	1.75014	0.152484	3.3639		0
Prr32	11.1719	0.589057	0.0527265	1.50426		0
Cdca7	10.9857	0.674304	0.0613804	1.59583		0
Cdca5	10.9505	1.23817	0.113069	2.35899		0
Mcm3	10.9286	1.23065	0.112608	2.34672		0
Uhrf1	10.8471	1.61158	0.148572	3.05586		0
Slc7a3	10.7519	1.15929	0.107822	2.23348		0
Tk1	10.7307	1.88574	0.175733	3.69542		0
Ccnf	10.63	1.17864	0.110878	2.26363		0
Ndc1	10.4605	0.90792	0.0867954	1.87634		0
Ints7	10.2531	0.687271	0.0670303	1.61023		0.483657
Col6a1	10.1456	0.552528	0.0544599	1.46665		0.483657
Pole	10.1128	1.04931	0.103761	2.06954		0.483657
Plekhh3	10.099	0.510717	0.0505709	1.42476		0.483657
Cdca7l	10.0894	0.86911	0.0861408	1.82654		0.483657
Mcm2	10.0061	0.962495	0.0961905	1.94868		0.483657
Dpf1	9.92785	0.676685	0.0681603	1.59846		0.483657
Cdca8	9.83694	1.40279	0.142605	2.64413		0.483657
Cemip	9.79051	1.18924	0.121468	2.28032		0.483657
Mcm5	9.71422	1.53887	0.158414	2.90567		0.483657
Soat2	9.28718	0.660295	0.0710975	1.58041		0.483657
Kif22	9.26614	1.56705	0.169115	2.96297		0.483657
Arsj	9.23508	0.65547	0.0709761	1.57513		0.483657
Rad51	9.22244	1.19771	0.129869	2.29375		0.483657
Ccna2	9.20032	1.92336	0.209054	3.79306		0.483657
Crabp2	9.09207	0.810966	0.0891949	1.75439		0.483657
Fam83d	9.05785	1.04588	0.115467	2.06462		0.483657
Sgcd	9.02461	0.505622	0.056027	1.41974		0.483657
Pdk1	9.01659	0.759918	0.0842799	1.69339		0.483657
Orc1	9.00184	0.845736	0.0939514	1.79718		0.483657
Tbc1d31	8.94143	0.838341	0.0937592	1.78799		0.483657
Ezh2	8.91462	0.654972	0.0734717	1.57459		0.483657
Cks1b	8.89023	0.789347	0.0887881	1.72829		0.483657
Top2a	8.85706	1.92835	0.217719	3.80619		0.483657
Apobec1	8.80122	0.595387	0.0676482	1.51088		0.483657
Tmx2	8.78776	0.4602	0.0523683	1.37573		0.483657
Cdca2	8.64188	1.19485	0.138263	2.28922		0.483657
Srpx2	8.62362	1.02332	0.118665	2.0326		0.483657
Slc38a4	8.61112	0.72425	0.0841063	1.65204		0.483657
Esco2	8.56929	1.33571	0.155872	2.524		0.483657
4931428F04Rik	8.55024	0.804611	0.094104	1.74668		0.483657
Hmgn5	8.49821	0.805726	0.0948113	1.74803		0.483657
Dolpp1	8.42223	0.471107	0.0559361	1.38617		0.483657
Lonp1	8.38608	0.667196	0.07956	1.58798		0.483657
Fen1	8.34077	0.853803	0.102365	1.80726		0.483657
Angptl6	8.32982	0.901463	0.108221	1.86796		0.483657
Ube2t	8.31499	1.08546	0.130542	2.12205		0.483657
Mcm6	8.23452	1.04775	0.127238	2.0673		0.483657
Timeless	8.22056	0.75	0.0912346	1.68179		0.483657
Pck2	8.20627	0.41295	0.0503212	1.33141		0.483657
Mad2l1	8.18959	1.12212	0.137018	2.17667		0.483657
AK145095	8.12921	0.6855	0.0843255	1.60826		0.483657
Lrr1	8.04879	0.908625	0.11289	1.87726		0.483657
Mtbp	8.01746	0.798395	0.099582	1.73916		0.483657
Maged2	7.96079	0.640539	0.0804617	1.55891		0.483657
Cdc6	7.9435	0.970898	0.122226	1.96006		0.483657
Wdr6	7.92108	0.578299	0.0730076	1.49309		0.483657
Rpn2	7.85664	0.436374	0.055542	1.3532		0.483657
Ncapd3	7.8426	0.452464	0.0576931	1.36837		0.483657
Slc1a4	7.77512	0.80663	0.103745	1.74912		0.483657
Fam64a	7.76975	1.83058	0.235604	3.55681		0.483657
Tacc3	7.76784	1.47315	0.189647	2.77627		0.483657
Hn1l	7.76067	0.631272	0.0813425	1.54893		0.483657
1190002F15Rik	7.7436	1.0177	0.131425	2.02469		0.483657
E2f8	7.72986	1.1682	0.151128	2.24732		0.483657
Usp1	7.6963	0.696803	0.0905374	1.62091		0.483657
Nt5dc2	7.68798	0.905459	0.117776	1.87314		0.483657
Cth	7.68622	1.19347	0.155274	2.28702		0.483657
Gins2	7.64409	1.23633	0.161737	2.35598		0.483657
D430036J16Rik	7.61411	0.403331	0.0529715	1.32256		0.483657
Mest	7.58127	1.32562	0.174855	2.50641		0.483657
Zfp367	7.56494	0.529752	0.0700272	1.44368		0.483657
Serpinh1	7.55765	0.543979	0.0719773	1.45799		0.483657
Mms22l	7.5153	0.847344	0.112749	1.79919		0.483657
Spc25	7.47324	0.845772	0.113173	1.79723		0.483657
Haus3	7.46049	0.629848	0.0844245	1.5474		0.483657
Neil3	7.45119	0.995103	0.13355	1.99322		0.483657
Cenpw	7.44602	0.530039	0.0711843	1.44397		0.483657
Mrgprf	7.40116	1.01104	0.136605	2.01536		0.483657
Incenp	7.39366	1.08325	0.14651	2.1188		0.483657
Pola2	7.37981	0.556957	0.0754704	1.47116		0.483657
Tmem173	7.34471	0.5135	0.0699142	1.42751		0.483657
Mlf1	7.34219	0.906536	0.12347	1.87454		0.483657
Bora	7.33614	0.789239	0.107582	1.72816		0.483657
Adamts14	7.30463	0.627586	0.0859162	1.54498		0.483657
Aurka	7.27291	1.63608	0.224956	3.1082		0.483657
Sgol2a	7.25906	1.10045	0.151596	2.14421		0.483657
Adh7	7.25853	0.908917	0.125221	1.87764		0.483657
Cdca3	7.25677	1.58715	0.218713	3.00455		0.483657
Ckap2l	7.25069	1.5913	0.219469	3.01321		0.483657
Pbk	7.20534	1.4604	0.202683	2.75185		0.483657
Sfxn2	7.17831	0.415661	0.0579051	1.33391		0.483657
Vldlr	7.17784	0.620506	0.0864474	1.53741		0.483657
Rgs3	7.17049	0.541404	0.0755045	1.45539		0.483657
Fbxo5	7.17025	1.48257	0.206767	2.79446		0.483657
Ccne1	7.14199	1.31314	0.183863	2.48483		0.483657
Shcbp1	7.13784	1.57875	0.22118	2.98711		0.483657
Chaf1a	7.12883	0.883177	0.123888	1.84443		0.483657
Fignl1	7.12583	1.17343	0.164674	2.25548		0.483657
Upf3b	7.08958	0.478928	0.0675538	1.39371		0.483657
Lig1	7.08091	1.09322	0.15439	2.13349		0.483657
Rpa1	7.07881	0.647006	0.0914004	1.56592		0.483657
Tnmd	7.06093	0.55438	0.0785138	1.46854		0.483657
Melk	7.05892	1.37474	0.194753	2.59322		0.483657
Birc5	7.05712	1.61802	0.229275	3.06954		0.483657
Cdt1	7.04139	0.845536	0.120081	1.79693		0.483657
4930427A07Rik	7.03162	1.04834	0.14909	2.06815		0.483657
C1qtnf6	7.00895	0.555016	0.0791868	1.46919		0.483657
Ecscr	6.98466	0.642949	0.0920515	1.56152		0.483657
Dck	6.95797	0.839093	0.120595	1.78893		0.483657
Lrrn3	6.94919	0.770997	0.110948	1.70645		0.483657
BC099602	6.94284	0.851656	0.122667	1.80457		0.483657
Nid2	6.93472	0.911005	0.131369	1.88035		0.483657
Rfc3	6.89334	0.55842	0.0810086	1.47266		0.483657
Efs	6.88649	0.645019	0.0936643	1.56376		0.483657
Hirip3	6.87888	0.709112	0.103085	1.6348		0.483657
Nsl1	6.85881	1.07727	0.157064	2.11004		0.483657
Cdc45	6.84731	1.23389	0.1802	2.352		0.483657
Sec16b	6.82681	0.488259	0.0715208	1.40275		0.483657
Chek1	6.81386	0.644374	0.0945681	1.56306		0.483657
Stard5	6.80035	0.464166	0.0682562	1.37952		0.483657
Stil	6.79585	0.921495	0.135597	1.89408		0.483657
Ahcyl1	6.79069	0.481951	0.0709723	1.39663		0.483657
Cenpq	6.7377	0.597111	0.0886225	1.51268		0.483657
H2afz	6.72578	0.750365	0.111565	1.68222		0.483657
Chaf1b	6.69232	1.16619	0.174258	2.24418		0.483657
Aunip	6.69129	0.63337	0.0946559	1.55118		0.483657
Eme1	6.6862	0.818377	0.122398	1.76342		0.483657
Cks2	6.66855	1.03077	0.154573	2.04312		0.483657
Atg4a	6.65962	0.375847	0.0564367	1.2976		0.483657
Depdc1a	6.6527	1.21924	0.18327	2.32824		0.483657
Tpst1	6.63081	0.476491	0.0718602	1.39136		0.483657
Rnft2	6.62443	0.339782	0.0512922	1.26556		0.483657
Gnb1l	6.61825	0.587127	0.0887133	1.50225		0.483657
Sfswap	6.59956	0.511846	0.0775575	1.42587		0.483657
Rpa2	6.58693	0.721827	0.109585	1.64927		0.483657
P4ha1	6.57101	0.691551	0.105243	1.61502		0.483657
Ero1l	6.56419	0.578768	0.0881705	1.49357		0.483657
Cenpi	6.53979	0.979274	0.149741	1.97147		0.483657
Gng8	6.52274	0.493647	0.075681	1.408		0.483657
Chtf18	6.51413	1.06776	0.163914	2.09617		0.483657
Spats2	6.49084	0.480238	0.073987	1.39497		0.483657
Brca1	6.45155	0.941474	0.14593	1.92049		0.483657
E2f1	6.43517	0.502195	0.0780391	1.41637		0.483657
Slc7a5	6.41746	0.611092	0.0952233	1.52741		0.483657
4930579G24Rik	6.40564	0.900079	0.140514	1.86617		0.483657
AK186650	6.40468	1.03743	0.161979	2.05256		0.483657
Wdhd1	6.40362	0.959051	0.149767	1.94403		0.483657
Rfx5	6.38916	0.767039	0.120053	1.70177		0.483657
Dek	6.36625	0.692936	0.108845	1.61657		0.483657
Stambpl1	6.35167	0.395794	0.0623134	1.31567		0.603299
Kpna2	6.32937	0.601558	0.0950424	1.51735		0.603299
Dhfr	6.32706	0.689356	0.108954	1.61256		0.603299
Cdk2	6.32589	0.674426	0.106614	1.59596		0.603299
Cdc20	6.32334	1.51441	0.239495	2.85682		0.603299
Cenpk	6.32026	0.521212	0.0824669	1.43516		0.603299
Kif18b	6.30112	1.33922	0.212537	2.53015		0.603299
Hspa9	6.27197	0.412125	0.0657089	1.33064		0.603299
Orc6	6.26471	0.567158	0.0905322	1.4816		0.603299
BC055324	6.2534	0.847007	0.135447	1.79877		0.603299
Nup85	6.23135	0.534226	0.0857319	1.44816		0.603299
Cenpo	6.22575	0.581917	0.0934694	1.49684		0.603299
Ska3	6.21832	0.997197	0.160364	1.99612		0.603299
Ndc80	6.21282	1.602	0.257853	3.03563		0.603299
Kif20a	6.21253	1.70617	0.274634	3.26293		0.603299
Ncapg2	6.19853	1.28161	0.20676	2.4311		0.603299
Gadd45a	6.19094	0.618893	0.0999675	1.5357		0.603299
Suv39h2	6.18724	0.425722	0.0688065	1.34324		0.603299
Tspan9	6.16479	0.672375	0.109067	1.59369		0.603299
Meox2	6.16446	0.433429	0.0703109	1.35044		0.603299
Abat	6.1501	0.851183	0.138401	1.80398		0.603299
Col1a1	6.14276	0.486856	0.079257	1.40139		0.603299
Rbl1	6.13304	0.730525	0.119113	1.65924		0.603299
Ivd	6.12308	0.480645	0.0784972	1.39537		0.603299
Aldh18a1	6.11268	0.552907	0.0904525	1.46704		0.603299
Suv39h1	6.10963	0.642696	0.105194	1.56124		0.603299
Snx10	6.09901	0.445364	0.0730224	1.36166		0.603299
Dbf4	6.09049	0.887075	0.145649	1.84942		0.603299
Dtl	6.08881	1.08782	0.178659	2.12553		0.603299
Insc	6.04547	0.607665	0.100516	1.52379		0.603299
Ccnb1	6.04219	1.73353	0.286905	3.32541		0.603299
Ms4a4d	6.03381	0.621858	0.103062	1.53886		0.603299
Arl15	6.0245	0.548602	0.0910619	1.46267		0.603299
Tyms	6.01693	0.880892	0.146402	1.84151		0.603299
Tpx2	6.01576	1.36525	0.226946	2.57622		0.603299
Ercc6l	6.0083	1.12124	0.186615	2.17534		0.603299
Paxip1	6.0074	0.541228	0.0900935	1.45521		0.603299
Slc22a23	6.00319	0.643688	0.107224	1.56232		0.603299
Mcm10	5.99774	0.986444	0.164469	1.9813		0.603299
Vrk1	5.99712	0.435683	0.0726487	1.35255		0.603299
Leo1	5.99344	0.482277	0.0804674	1.39695		0.603299
Igfbp6	5.99154	0.534212	0.089161	1.44815		0.603299
Ednrb	5.99121	0.674268	0.112543	1.59579		0.603299
Chrnb1	5.97403	0.36009	0.0602759	1.28351		0.603299
Mcm4	5.96734	0.775724	0.129995	1.71205		0.603299
Sdsl	5.9204	0.377749	0.0638047	1.29931		0.655947
Gstm2	5.90459	0.496372	0.0840653	1.41066		0.655947
Pcyt1b	5.86813	0.685189	0.116764	1.60791		0.655947
Bub1b	5.86413	1.54429	0.263345	2.91661		0.655947
Adra1d	5.86396	0.361218	0.0615997	1.28451		0.655947
Pfkfb3	5.84605	0.455959	0.0779943	1.37169		0.655947
Xrcc1	5.8389	0.383829	0.0657365	1.3048		0.655947
Traip	5.83382	0.953728	0.163483	1.93687		0.655947
Acvr2a	5.82753	0.896211	0.153789	1.86117		0.655947
Fam110b	5.81095	0.750718	0.12919	1.68263		0.655947
Dpt	5.79898	1.24093	0.213991	2.36351		0.655947
Adamtsl1	5.79066	0.746183	0.12886	1.67735		0.655947
Ckap2	5.78617	0.89667	0.154968	1.86176		0.655947
Exo1	5.75193	0.842646	0.146498	1.79334		0.655947
Lrfn1	5.74449	0.358056	0.0623303	1.2817		0.655947
Ikbkap	5.74285	0.32668	0.0568846	1.25412		0.655947
Recql4	5.73806	0.844411	0.14716	1.79553		0.655947
Racgap1	5.73213	1.52365	0.265809	2.87518		0.655947
Cstf2	5.71514	0.429886	0.0752188	1.34713		0.655947
Plk1	5.68161	1.69886	0.29901	3.24644		0.655947
Aldoc	5.67955	0.877945	0.15458	1.83776		0.655947
Topbp1	5.66112	0.837106	0.147869	1.78646		0.655947
Nnat	5.65846	0.390229	0.0689638	1.3106		0.655947
Haus4	5.65139	0.595266	0.105331	1.51075		0.655947
Ccne2	5.64969	1.24255	0.219933	2.36617		0.655947
Fanca	5.63133	0.847988	0.150584	1.79999		0.655947
Ermp1	5.61594	0.562601	0.100179	1.47693		0.655947
Ctnnal1	5.60989	0.427575	0.0762181	1.34497		0.655947
Ibtk	5.56457	0.429957	0.0772668	1.34719		0.655947
Kif11	5.55738	1.46879	0.264295	2.76789		0.655947
Cep192	5.54418	0.452035	0.0815332	1.36797		0.655947
Adamts1	5.54385	0.94388	0.170257	1.9237		0.655947
Cdkl1	5.54228	0.306817	0.0553592	1.23698		0.655947
Mxd3	5.52841	1.49821	0.271002	2.82492		0.82763
Npcd	5.52735	0.491824	0.08898	1.40622		0.82763
Col6a3	5.52646	0.476318	0.0861886	1.39119		0.82763
Anln	5.52225	1.61383	0.292242	3.06064		0.82763
Atad2	5.52167	1.25129	0.226614	2.38054		0.82763
Mapk6	5.51938	0.479973	0.0869614	1.39472		0.82763
Dis3	5.51752	0.440498	0.0798362	1.35707		0.82763
Tmem132a	5.5045	0.304123	0.0552498	1.23467		0.82763
AK207784	5.50356	0.73879	0.134239	1.66878		0.82763
Cdc42ep2	5.50287	0.677456	0.12311	1.59932		0.82763
Tfdp1	5.49187	0.403349	0.0734447	1.32257		0.82763
Cst6	5.48399	0.432432	0.0788536	1.34951		0.82763
Cenpn	5.48159	1.14874	0.209563	2.2172		0.82763
Igfbp3	5.47927	2.05112	0.374341	4.14426		0.82763
Ncapg	5.47561	1.38058	0.252133	2.60374		0.82763
Cdh3	5.46197	0.618391	0.113218	1.53516		0.82763
Lrrc17	5.46128	0.857478	0.15701	1.81187		0.82763
Gbe1	5.45548	0.551523	0.101095	1.46563		0.82763
Psph	5.43884	0.965183	0.177461	1.95231		0.82763
Vars	5.42864	0.396902	0.0731127	1.31668		0.82763
Alg8	5.41874	0.637882	0.117718	1.55604		0.82763
Pitrm1	5.40018	0.328387	0.0608103	1.25561		0.82763
Spag5	5.38991	1.21522	0.225463	2.32177		0.82763
Ifi27	5.38471	0.250202	0.0464652	1.18937		0.82763
Apmap	5.38196	0.522376	0.0970605	1.43632		0.82763
Pus7	5.37882	0.272321	0.0506284	1.20775		0.82763
C330027C09Rik	5.37673	1.21387	0.225763	2.31958		0.82763
Camkk1	5.37046	0.382496	0.0712222	1.3036		0.82763
Kifc1	5.35132	0.953792	0.178235	1.93696		0.82763
Zcchc5	5.34107	1.74096	0.325956	3.34257		0.82763
Fabp5	5.33651	0.661066	0.123876	1.58125		0.82763
Lrp8	5.33445	0.777629	0.145775	1.71431		0.82763
Adamts4	5.33433	0.560679	0.105108	1.47496		0.82763
Pcna	5.3188	0.666058	0.125227	1.58673		0.82763
Tcea1	5.30867	0.413375	0.0778681	1.3318		0.82763
Mlec	5.30251	0.477427	0.0900379	1.39226		0.82763
Hist1h2be	5.30233	0.586135	0.110543	1.50122		0.82763
Elovl6	5.30097	0.712837	0.134473	1.63902		0.82763
Mboat1	5.29786	0.445951	0.0841757	1.36221		0.82763
Taf15	5.2975	0.490091	0.0925135	1.40453		0.82763
Mgst1	5.29621	0.833375	0.157353	1.78185		0.82763
Ggn	5.28523	0.27714	0.0524368	1.21179		0.82763
Haus6	5.28436	0.693359	0.13121	1.61704		0.82763
Lsm3	5.2807	0.419177	0.0793791	1.33716		0.82763
Il13ra1	5.26529	0.753936	0.14319	1.68639		0.82763
Dclk3	5.25832	0.27642	0.0525681	1.21119		0.82763
Eln	5.24857	0.46816	0.0891975	1.38334		0.82763
2700099C18Rik	5.24377	1.1458	0.218507	2.21269		0.82763
Ldb2	5.23768	1.2349	0.235773	2.35365		0.82763
Spdl1	5.23252	0.870319	0.166329	1.82807		0.82763
Bub1	5.22778	1.32874	0.25417	2.51184		0.82763
Bnip3	5.21908	0.660247	0.126506	1.58035		0.82763
Mab21l3	5.21694	0.312073	0.0598192	1.24149		0.82763
Tgfbi	5.21354	0.667158	0.127966	1.58794		0.82763
E2f7	5.20376	0.773223	0.148589	1.70908		0.82763
Mpzl1	5.1987	0.51573	0.0992036	1.42972		0.82763
Ska1	5.1969	0.802097	0.154342	1.74363		0.82763
Rqcd1	5.19196	0.365025	0.0703058	1.2879		0.82763
Fanci	5.18918	0.684148	0.131841	1.60675		0.82763
Smc2	5.18835	1.14647	0.22097	2.21372		0.82763
Dna2	5.1845	0.667145	0.128681	1.58793		0.82763
Aurkb	5.17946	1.60926	0.310701	3.05096		0.82763
Troap	5.14789	1.05503	0.204944	2.07776		1.25462
Nek2	5.14412	1.08894	0.211686	2.12718		1.25462
Kntc1	5.13692	1.15254	0.224364	2.22305		1.25462
Pttg1	5.12265	1.0198	0.199078	2.02764		1.25462
Abcc4	5.11208	0.478524	0.0936066	1.39332		1.25462
Slc29a2	5.09882	0.300332	0.0589023	1.23143		1.25462
Cdc7	5.08814	0.839586	0.165009	1.78954		1.25462
Pkia	5.08658	0.726064	0.142741	1.65412		1.25462
Isoc1	5.08409	1.20687	0.237381	2.30836		1.25462
Pola1	5.081	0.868259	0.170884	1.82546		1.25462
Tcof1	5.07383	0.345869	0.0681672	1.27092		1.25462
Hjurp	5.07339	0.807619	0.159187	1.75032		1.25462
Ccdc47	5.07232	0.333156	0.0656813	1.25977		1.25462
Cadm2	5.06731	0.307076	0.0605995	1.2372		1.25462
Nrk	5.05737	2.18855	0.432745	4.55847		1.25462
Dusp18	5.05253	0.397753	0.0787236	1.31745		1.25462
2310022B05Rik	5.04982	0.449241	0.0889616	1.36532		1.25462
D17H6S56E-5	5.01848	1.37588	0.274163	2.59526		1.25462
Col6a2	5.00847	0.510617	0.101951	1.42466		1.25462
Parpbp	5.00638	0.914916	0.18275	1.88546		1.25462
Pfas	5.00336	0.399708	0.0798878	1.31924		1.25462
Tmem126a	5.00328	0.51815	0.103562	1.43212		1.25462
Pon3	4.99423	0.460655	0.0922375	1.37617		1.25462
Ung	4.9938	0.51244	0.102615	1.42646		1.25462
Krt17	4.97667	0.367853	0.0739155	1.29043		1.25462
Msrb2	4.97012	0.310354	0.0624438	1.24001		1.25462
Nusap1	4.96783	1.55759	0.313534	2.94361		1.25462
Diap3	4.94631	1.11321	0.225059	2.16326		1.25462
Sgsm1	4.94121	0.5277	0.106796	1.44163		1.25462
Aars	4.93812	0.367636	0.0744485	1.29024		1.25462
Dlgap5	4.93668	1.52146	0.308196	2.87082		1.25462
Psat1	4.9142	1.02175	0.207919	2.03038		1.25462
Casp3	4.91206	0.342305	0.0696867	1.26778		1.25462
Idh2	4.90465	0.817504	0.166679	1.76235		1.25462
Kank1	4.9002	0.525698	0.107281	1.43963		1.25462
Sass6	4.8985	0.55251	0.112792	1.46664		1.25462
Zfp772	4.88979	0.461929	0.0944681	1.37738		1.25462
Foxm1	4.85087	1.21615	0.250707	2.32326		1.25462
Gtse1	4.8251	0.317469	0.0657954	1.24614		1.25462
Cenpa	4.82328	1.29559	0.268611	2.45477		1.25462
Wdr35	4.81817	0.366933	0.0761561	1.28961		1.25462
Hat1	4.81111	0.46289	0.0962126	1.3783		1.25462
E2f2	4.80951	0.236118	0.049094	1.17782		1.25462
Fads1	4.80936	0.375991	0.078179	1.29773		1.25462
Tsen15	4.80654	0.288769	0.0600783	1.2216		1.56755
Ect2	4.80595	1.46763	0.305377	2.76567		1.56755
Dennd2a	4.80346	0.454184	0.0945534	1.37001		1.56755
Zfp346	4.79142	0.233728	0.0487805	1.17587		1.56755
Lpar4	4.78865	0.851281	0.177771	1.8041		1.56755
Ccnb2	4.78761	1.57056	0.328046	2.97019		1.56755
Papss1	4.78544	0.340102	0.0710702	1.26585		1.56755
Rad54l	4.78257	0.899682	0.188117	1.86566		1.56755
Lrrc40	4.76675	0.611275	0.128237	1.52761		1.56755
Gpt2	4.76472	0.566896	0.118978	1.48133		1.56755
Gins1	4.75383	0.753096	0.158419	1.68541		1.56755
Fut4	4.75119	0.259866	0.054695	1.19737		1.56755
Mark1	4.74986	0.440448	0.0927287	1.35703		1.56755
Syndig1	4.74204	0.564438	0.119028	1.47881		1.56755
Kif20b	4.73815	1.23621	0.260906	2.35579		1.56755
Ddit4	4.72438	0.833841	0.176497	1.78242		1.56755
Hmmr	4.72272	1.48191	0.313783	2.79318		1.56755
Gap43	4.71782	0.561416	0.118999	1.47572		1.56755
Kif2a	4.71642	0.271304	0.0575233	1.2069		1.56755
1700025G04Rik	4.71548	0.297642	0.0631202	1.22913		1.56755
Kif4	4.71493	1.15318	0.24458	2.22404		1.56755
Kif15	4.71329	0.971466	0.206112	1.96083		1.56755
Raet1e	4.70732	0.473668	0.100624	1.38864		1.56755
Clspn	4.70381	1.22505	0.260438	2.33764		1.56755
Lum	4.70016	1.95973	0.41695	3.88989		1.56755
Trim2	4.69299	0.269653	0.0574587	1.20552		1.56755
Pcdhga6	4.68807	0.359061	0.0765904	1.28259		1.56755
Txlna	4.6819	0.354187	0.0756503	1.27826		1.56755
Mtfr2	4.67617	0.658433	0.140806	1.57837		1.56755
Espl1	4.67468	0.954901	0.204271	1.93845		1.56755
Eprs	4.67227	0.610645	0.130696	1.52694		1.56755
Aldh1l2	4.67167	0.949821	0.203315	1.93163		1.56755
Ncapd2	4.66587	1.26092	0.270244	2.39649		1.56755
Galnt16	4.66013	0.619241	0.132881	1.53607		1.56755
Pcolce	4.64211	0.554442	0.119438	1.4686		1.56755
Pold2	4.64	0.529795	0.11418	1.44372		1.56755
Lmnb2	4.62708	0.655842	0.14174	1.57554		1.56755
Myo1b	4.61844	0.458903	0.0993633	1.3745		1.56755
Fbn2	4.61259	1.42279	0.308459	2.68104		1.56755
Xrcc2	4.61111	0.410299	0.0889805	1.32896		1.56755
Nup107	4.61106	0.445209	0.0965525	1.36151		1.56755
Ssr1	4.60999	0.468146	0.10155	1.38333		1.56755
Mfsd6	4.60437	0.434653	0.0944002	1.35159		1.56755
Ccsap	4.60293	0.509615	0.110715	1.42367		1.56755
Nnmt	4.60224	0.731347	0.158911	1.66019		1.56755
Rian	4.60213	0.294598	0.0640134	1.22654		1.56755
Fam111a	4.60211	1.03312	0.22449	2.04645		1.56755
Rcor2	4.60139	0.813003	0.176687	1.75687		1.56755
Tipin	4.60042	0.610271	0.132655	1.52655		1.56755
Metrnl	4.59826	0.558295	0.121414	1.47253		1.56755
Lhpp	4.59695	0.364356	0.0792604	1.28731		1.56755
Aldh1a1	4.59261	1.30291	0.283698	2.46727		1.56755
Kif21b	4.59033	0.902688	0.19665	1.86955		1.56755
Nuf2	4.58733	1.61982	0.353108	3.07337		1.56755
Plek2	4.57944	0.243931	0.0532665	1.18421		1.56755
Nmb	4.57744	0.659345	0.144042	1.57937		1.56755
D8Ertd82e	4.56941	0.648102	0.141835	1.56711		1.56755
Avpr1a	4.567	0.489281	0.107134	1.40375		1.56755
Elmo2	4.55842	0.241788	0.053042	1.18246		1.56755
Usp13	4.55418	0.419276	0.0920642	1.33726		1.56755
Gsg2	4.53975	0.698728	0.153913	1.62307		1.56755
Arhgap33	4.53322	0.57419	0.126663	1.48884		1.56755
Skp2	4.53273	0.692414	0.152759	1.61599		1.56755
Impa2	4.52636	0.739967	0.16348	1.67014		1.56755
Ddit3	4.52608	0.555926	0.122827	1.47011		1.56755
4930503L19Rik	4.52366	0.388164	0.0858075	1.30873		1.56755
Lhfpl2	4.51775	0.458886	0.101574	1.37448		1.56755
Itga7	4.51197	0.381529	0.0845593	1.30272		1.56755
BC052761	4.50368	0.241016	0.0535155	1.18182		1.56755
Slc38a1	4.49896	0.57886	0.128665	1.49367		1.56755
Syne1	4.49559	0.26838	0.0596985	1.20445		1.56755
Dnmt1	4.49054	0.643531	0.143308	1.56215		1.56755
Plk4	4.48693	1.01529	0.226278	2.02131		1.56755
Anp32e	4.47777	0.369823	0.0825908	1.29219		1.56755
Mpp1	4.47494	0.383455	0.0856896	1.30446		1.56755
Cbx3	4.46704	0.275867	0.0617561	1.21072		1.56755
Dctpp1	4.45545	0.512345	0.114993	1.42637		1.88299
Pif1	4.45534	0.660941	0.148348	1.58111		1.88299
Snca	4.4439	1.07916	0.24284	2.1128		1.88299
Trim66	4.43905	1.19672	0.26959	2.29218		1.88299
Sybu	4.4388	0.375088	0.0845023	1.29692		1.88299
Ints2	4.43835	0.399655	0.0900458	1.31919		1.88299
D2Wsu81e	4.43722	0.43548	0.0981427	1.35236		1.88299
Suz12	4.43195	0.216436	0.0488353	1.16186		1.88299
Dynlt1f	4.43045	0.370119	0.0835399	1.29246		1.88299
Fam72a	4.42534	0.417762	0.0944021	1.33585		1.88299
Mlst8	4.42379	0.252874	0.0571623	1.19158		1.88299
Rfc2	4.42345	0.365418	0.0826093	1.28825		1.88299
Exog	4.42038	0.419602	0.0949246	1.33756		1.88299
Negr1	4.41621	0.311849	0.0706146	1.2413		1.88299
Matn2	4.41048	1.00086	0.226927	2.00119		1.88299
Kif18a	4.39435	0.782963	0.178175	1.72066		1.88299
Nucks1	4.39384	0.289369	0.065858	1.22211		1.88299
Clvs1	4.39365	0.667274	0.151872	1.58807		1.88299
Rrbp1	4.39343	0.394107	0.0897037	1.31413		1.88299
Sgol1	4.39257	1.16671	0.265611	2.245		1.88299
AK161964	4.39123	2.07388	0.472277	4.21018		1.88299
Cenpm	4.38998	1.26059	0.287151	2.39593		1.88299
Ctsh	4.38794	0.368771	0.0840419	1.29125		1.88299
Cenpf	4.38149	0.982088	0.224145	1.97532		1.88299
Pnrc2	4.3794	0.411445	0.0939501	1.33002		1.88299
Bbs9	4.37509	0.324721	0.0742205	1.25242		1.88299
Pop1	4.37445	0.271265	0.0620112	1.20687		1.88299
Bcat1	4.37214	0.833805	0.190709	1.78238		1.88299
Skiv2l2	4.37029	0.354833	0.0811921	1.27884		1.88299
Wnt16	4.36382	0.776859	0.178023	1.7134		1.88299
Nucb2	4.34546	0.511756	0.117768	1.42578		1.88299
Trip13	4.34407	1.10512	0.254398	2.15117		1.88299
Tgif2	4.34237	0.244856	0.0563877	1.18497		1.88299
Fancb	4.33873	0.741198	0.170833	1.67156		1.88299
Focad	4.33761	0.514223	0.11855	1.42822		1.88299
Cntn2	4.33733	1.12304	0.258925	2.17806		1.88299
KM066944	4.33567	0.49249	0.11359	1.40687		1.88299
Fancm	4.33465	0.522353	0.120506	1.4363		1.88299
Tmem121	4.33277	0.35134	0.0810889	1.27574		1.88299
Tex30	4.32667	0.719013	0.166182	1.64606		1.88299
Ddx11	4.32575	0.629627	0.145553	1.54716		1.88299
Piga	4.32513	0.595169	0.137607	1.51065		1.88299
Emc1	4.3247	0.367276	0.0849251	1.28991		1.88299
Apobr	4.32122	0.3903	0.0903217	1.31067		1.88299
Cdr2l	4.31699	0.39186	0.0907716	1.31208		1.88299
Pde3b	4.31182	0.762813	0.176912	1.6968		1.88299
Iqsec2	4.31049	0.312981	0.0726093	1.24227		1.88299
Rnf125	4.30627	0.354534	0.0823297	1.27857		1.88299
AK211268	4.30111	1.00121	0.23278	2.00168		1.88299
3110021A11Rik	4.29701	0.229575	0.0534266	1.17249		1.88299
Fam109b	4.2929	0.290285	0.0676199	1.22288		1.88299
Arhgap18	4.29048	0.640852	0.149366	1.55925		1.88299
Tmem51	4.29014	0.789689	0.184071	1.7287		1.88299
Dera	4.28294	0.411743	0.0961356	1.33029		1.88299
Elac2	4.28161	0.296091	0.0691542	1.22781		1.88299
Kif2c	4.27863	1.55479	0.363384	2.93791		1.88299
Lmnb1	4.27851	0.969734	0.226653	1.95848		1.88299
Zfp90	4.27025	0.290494	0.0680274	1.22306		1.88299
Whsc1	4.26901	0.512643	0.120085	1.42666		1.88299
Lonrf3	4.2577	0.326391	0.0766589	1.25387		1.88299
Rhbdd1	4.25705	0.354608	0.0832991	1.27864		1.88299
Susd2	4.25308	0.231711	0.0544807	1.17423		1.88299
Kif24	4.24373	0.399241	0.0940778	1.31881		1.88299
Xpot	4.23957	0.485888	0.114608	1.40045		1.88299
Mthfd2	4.2385	0.557733	0.131588	1.47195		1.88299
Ankrd10	4.23373	0.29961	0.0707673	1.23081		1.88299
Col3a1	4.23199	1.29283	0.30549	2.45008		1.88299
Prr11	4.22796	1.16534	0.275626	2.24286		1.88299
Sh3bp2	4.22706	0.31285	0.0740112	1.24216		1.88299
Cep76	4.21651	0.453433	0.107538	1.36929		1.88299
Cdk7	4.21543	0.259255	0.0615016	1.19686		1.88299
Mis12	4.214	0.413538	0.0981342	1.33195		1.88299
Tmem42	4.20945	0.426993	0.101437	1.34443		1.88299
Kifc5b	4.20036	1.02981	0.245173	2.04176		1.88299
Cass4	4.20007	0.49112	0.116931	1.40554		1.88299
Pik3r3	4.19566	0.471818	0.112454	1.38686		1.88299
Dhx32	4.19156	0.321929	0.0768041	1.25		1.88299
Gmnn	4.18482	1.20564	0.288097	2.30639		1.88299
Ttyh3	4.18381	0.6716	0.160524	1.59284		1.88299
Haus8	4.1838	0.288251	0.068897	1.22116		1.88299
Rab30	4.18082	0.73754	0.176411	1.66733		1.88299
Acsl1	4.17996	0.524632	0.125511	1.43857		1.88299
Dhrs13	4.17932	0.399488	0.0955868	1.31904		1.88299
Nfe2l1	4.17784	0.332523	0.0795919	1.25921		1.88299
Canx	4.17697	0.323836	0.0775289	1.25165		1.88299
Mei4	4.17468	0.347382	0.0832117	1.27225		1.88299
Slc24a3	4.17394	0.497428	0.119175	1.41169		1.88299
Mtmr4	4.17057	0.344527	0.0826091	1.26973		1.88299
Pold1	4.1674	0.582103	0.13968	1.49703		1.88299
Smtn	4.16228	0.369173	0.0886949	1.29161		1.88299
Gyk	4.16058	0.473949	0.113914	1.38891		1.88299
Phf10	4.15955	0.396912	0.0954219	1.31669		1.88299
Aox1	4.15891	0.482504	0.116017	1.39717		1.88299
Blm	4.15552	0.591422	0.142322	1.50673		1.88299
BC026208	4.15391	0.370997	0.0893128	1.29325		1.88299
Maob	4.14978	0.329277	0.0793481	1.25638		1.88299
BC054353	4.14391	0.37001	0.0892902	1.29236		1.88299
Med24	4.14136	0.315151	0.0760984	1.24414		1.88299
Lpar1	4.14017	0.54291	0.131132	1.45691		1.88299
Cchcr1	4.13628	0.449091	0.108574	1.36518		1.88299
Fkbp7	4.13387	0.447261	0.108194	1.36345		1.88299
Cntn4	4.12122	0.503775	0.122239	1.41792		1.88299
Casc5	4.121	0.895063	0.217196	1.85969		1.88299
AK184299	4.11568	0.78377	0.190435	1.72162		1.88299
Aph1b	4.10837	0.346638	0.0843737	1.27159		2.14438
Iqgap3	4.10022	1.25316	0.305633	2.38363		2.14438
Srsf1	4.09556	0.364087	0.088898	1.28707		2.14438
Sema4b	4.08915	0.244156	0.0597081	1.1844		2.14438
Nup43	4.08727	0.529835	0.12963	1.44376		2.14438
Nov	4.08289	1.07953	0.264403	2.11334		2.14438
Fgf21	4.0766	0.979406	0.240251	1.97165		2.14438
Ccdc149	4.07488	0.403134	0.0989315	1.32238		2.14438
Ept1	4.07371	0.385086	0.0945294	1.30594		2.14438
Agap1	4.07285	0.430316	0.105655	1.34753		2.14438
Sgpp1	4.0724	0.462154	0.113484	1.3776		2.14438
Tonsl	4.06755	0.504355	0.123995	1.41849		2.14438
Nup37	4.06481	0.35773	0.0880067	1.28141		2.14438
Kcnk5	4.0606	0.367823	0.0905834	1.2904		2.14438
Cyp20a1	4.05963	0.355748	0.0876307	1.27965		2.14438
Cdkn3	4.05428	0.844759	0.208363	1.79596		2.14438
Slc43a1	4.05133	0.489877	0.120918	1.40432		2.14438
Rnf4	4.04859	0.279997	0.0691591	1.21419		2.14438
Aspn	4.04722	0.716362	0.177001	1.64303		2.14438
Gcat	4.04239	0.366886	0.0907598	1.28957		2.14438
Tmem64	4.03697	0.271179	0.0671739	1.20679		2.14438
AK089957	4.03619	0.395802	0.0980633	1.31567		2.14438
Tmem144	4.03433	0.607731	0.15064	1.52386		2.14438
Hfe	4.03055	0.823879	0.204408	1.77016		2.14438
Lin54	4.02234	0.586346	0.145772	1.50144		2.14438
Tsr2	4.01725	0.308658	0.0768331	1.23855		2.14438
Igf2bp3	4.01164	0.342309	0.0853288	1.26778		2.14438
Sesn2	4.00663	0.445067	0.111083	1.36138		2.14438
Opa3	4.00422	0.239612	0.0598399	1.18068		2.14438
Gm4724	4.00392	0.474796	0.118583	1.38972		2.14438
Iars	3.9953	0.37476	0.0938004	1.29662		2.14438
Il17d	3.99179	0.396838	0.0994137	1.31662		2.14438
Tcirg1	3.99077	0.258641	0.0648099	1.19635		2.14438
Fam126a	3.98285	0.296907	0.0745463	1.22851		2.14438
Cd1d1	3.9823	0.565617	0.142033	1.48002		2.14438
Urb1	3.97819	0.239991	0.0603268	1.18099		2.14438
Rnase10	3.97522	0.279301	0.0702606	1.21361		2.14438
Itfg2	3.97386	0.2083	0.0524175	1.15533		2.14438
AI506816	3.96996	0.362484	0.0913067	1.28564		2.14438
Riok2	3.96927	0.307998	0.0775958	1.23799		2.14438
Donson	3.9655	0.393174	0.0991487	1.31328		2.14438
Stc2	3.96302	1.43424	0.361907	2.7024		2.14438
AK164085	3.96252	0.294644	0.0743578	1.22658		2.14438
Parp1	3.95758	0.584268	0.147633	1.49928		2.14438
Gng2	3.95582	0.44499	0.11249	1.3613		2.14438
Pxdn	3.95401	0.58596	0.148194	1.50104		2.14438
Sox12	3.95385	0.588823	0.148924	1.50402		2.14438
Pole3	3.94989	0.348784	0.0883023	1.27349		2.14438
Tdg	3.94977	0.310776	0.0786819	1.24037		2.14438
Crybg3	3.94887	0.283527	0.0717996	1.21717		2.14438
Snord22	3.94771	2.99979	0.759882	7.99886		2.14438
Tmem209	3.94738	0.366701	0.0928971	1.2894		2.14438
Rftn2	3.94047	0.482291	0.122394	1.39696		2.14438
Rfc5	3.93903	0.795529	0.201961	1.73571		2.14438
Stt3b	3.93445	0.249594	0.0634381	1.18887		2.14438
Lrrc59	3.93238	0.427111	0.108614	1.34454		2.14438
Antxr2	3.92953	0.636099	0.161877	1.55412		2.14438
Npas2	3.92791	0.367509	0.0935636	1.29012		2.14438
Apln	3.92513	0.62437	0.15907	1.54154		2.14438
Aco1	3.92345	0.277901	0.0708306	1.21243		2.14438
Mbd4	3.92092	0.391542	0.0998597	1.3118		2.14438
Lgr5	3.9183	0.732969	0.187063	1.66206		2.14438
Igsf10	3.91552	0.699714	0.178703	1.62418		2.14438
Ttk	3.91444	1.065	0.27207	2.09218		2.14438
Ube3c	3.91383	0.254431	0.0650081	1.19286		2.14438
Sesn3	3.90596	1.20593	0.308742	2.30687		2.14438
Pcdhac2	3.90581	0.393403	0.100723	1.31349		2.14438
Ints1	3.89631	0.332671	0.085381	1.25934		2.14438
Wdr62	3.89363	0.553646	0.142193	1.46779		2.14438
Ppp1r10	3.89152	0.29495	0.0757928	1.22684		2.14438
AK017779	3.88788	0.22389	0.0575867	1.16788		2.14438
Magt1	3.88776	0.272558	0.0701066	1.20795		2.14438
2810001G20Rik	3.88609	0.319645	0.0822536	1.24802		2.14438
Cep128	3.88553	0.550947	0.141794	1.46505		2.14438
Nasp	3.88244	0.490372	0.126305	1.40481		2.14438
Wdr90	3.87954	0.468993	0.120889	1.38414		2.14438
Taf5l	3.87842	0.251346	0.0648063	1.19032		2.14438
Srd5a1	3.87733	0.268865	0.0693429	1.20486		2.14438
Gys1	3.8756	0.366252	0.0945019	1.289		2.14438
Cdc25c	3.87195	0.994063	0.256734	1.99179		2.14438
Bckdhb	3.86855	0.470448	0.121608	1.38554		2.14438
Kif23	3.86789	1.52297	0.393747	2.87382		2.14438
Dbt	3.86713	0.539339	0.139467	1.45331		2.14438
Orc2	3.86198	0.271287	0.0702457	1.20688		2.14438
Bend6	3.8616	0.258047	0.0668238	1.19586		2.14438
Stard7	3.86123	0.27283	0.0706587	1.20818		2.14438
Optc	3.85878	0.410099	0.106277	1.32878		2.14438
Apitd1	3.857	0.478972	0.124182	1.39375		2.14438
Gm20604	3.85398	0.344738	0.0894498	1.26992		2.14438
F11r	3.84749	0.32272	0.0838781	1.25069		2.14438
Lins	3.84565	0.298141	0.0775268	1.22956		2.14438
Adm2	3.84108	0.840213	0.218744	1.79031		2.14438
Pkmyt1	3.84045	1.1208	0.291842	2.17468		2.14438
Vps33b	3.83879	0.252915	0.0658842	1.19161		2.14438
Eif4enif1	3.83552	0.209185	0.0545389	1.15604		2.14438
Dhcr7	3.83388	0.401295	0.104671	1.32069		2.14438
AK207524	3.83206	0.297434	0.0776172	1.22896		2.14438
Arl14ep	3.82968	0.388182	0.101362	1.30874		2.14438
Brip1	3.82918	0.790446	0.206427	1.72961		2.14438
A630033H20Rik	3.82828	0.359065	0.0937928	1.28259		2.14438
Paqr3	3.81514	0.687347	0.180163	1.61032		2.14438
Ralgps2	3.80923	0.423254	0.111113	1.34095		2.14438
Alkbh1	3.80812	0.24323	0.0638714	1.18364		2.14438
Gmps	3.80531	0.252838	0.0664436	1.19155		2.14438
Shmt2	3.80457	0.513922	0.13508	1.42793		2.14438
Tmem35	3.80202	0.460316	0.121071	1.37584		2.14438
Hmgb2	3.7954	0.946427	0.249362	1.92709		2.14438
Epha7	3.78631	0.319027	0.084258	1.24749		2.29253
Gas2	3.77635	1.29297	0.342386	2.45032		2.29253
Reep1	3.77528	0.477229	0.126409	1.39207		2.29253
Kcnk2	3.7748	0.60009	0.158973	1.51581		2.29253
Nup188	3.77472	0.372427	0.0986634	1.29453		2.29253
Col11a1	3.7735	0.835572	0.221431	1.78456		2.29253
Echdc1	3.76683	0.407536	0.108191	1.32642		2.29253
Lpl	3.76526	1.80908	0.480468	3.5042		2.29253
AK184121	3.76513	0.591344	0.157058	1.50665		2.29253
1700086L19Rik	3.7642	0.22555	0.0599197	1.16922		2.29253
Copg1	3.76386	0.282926	0.0751692	1.21666		2.29253
Ptn	3.76365	2.2899	0.608425	4.89023		2.29253
Napb	3.76301	0.396703	0.105422	1.3165		2.29253
Prpf4	3.75982	0.235495	0.0626345	1.17731		2.29253
Acy1	3.75692	0.277236	0.0737936	1.21187		2.29253
Gstm1	3.75405	0.622095	0.165713	1.53911		2.29253
Thbd	3.75163	1.22832	0.327409	2.34294		2.29253
Papd4	3.74851	0.432	0.115246	1.3491		2.29253
Akip1	3.74204	0.307524	0.0821807	1.23758		2.29253
Ttc39b	3.73934	0.264505	0.0707358	1.20122		2.29253
Fancd2	3.73903	0.706911	0.189063	1.6323		2.29253
Tubb4a	3.73652	0.397681	0.106431	1.31739		2.29253
Lca5	3.73289	0.311789	0.0835248	1.24125		2.29253
Wars	3.7319	0.391681	0.104955	1.31192		2.29253
Gstm7	3.7303	0.819173	0.2196	1.76439		2.29253
Uvrag	3.72969	0.349214	0.0936309	1.27387		2.29253
Ssc5d	3.7296	0.675909	0.181228	1.5976		2.29253
Aknad1	3.72288	0.241492	0.064867	1.18221		2.29253
Aard	3.72059	0.501462	0.134781	1.41565		2.29253
Fibin	3.71553	0.764646	0.205798	1.69895		2.29253
Ccnd2	3.71443	0.660568	0.177839	1.5807		2.29253
Ticrr	3.71369	0.621276	0.167293	1.53823		2.29253
Trim46	3.71204	0.392615	0.105768	1.31277		2.29253
Cd276	3.70543	0.279653	0.0754711	1.2139		2.29253
Zfp930	3.69599	0.353782	0.0957205	1.27791		2.29253
Mfap4	3.68569	0.713265	0.193523	1.63951		2.29253
Srsf3	3.68533	0.357579	0.0970278	1.28127		2.29253
Aplf	3.68131	0.322598	0.0876314	1.25058		2.29253
Prim1	3.68014	0.826473	0.224576	1.77334		2.29253
Pdia4	3.67967	0.491671	0.133618	1.40607		2.29253
Katnb1	3.67927	0.182665	0.049647	1.13498		2.29253
Sync	3.67843	0.350992	0.0954192	1.27544		2.29253
Cenpe	3.67825	1.0734	0.291825	2.10439		2.29253
Rcn3	3.67746	0.268428	0.0729928	1.20449		2.29253
Casp1	3.67539	0.229102	0.062334	1.1721		2.29253
As3mt	3.67317	0.379785	0.103394	1.30115		2.29253
Nsg1	3.66216	0.715568	0.195395	1.64213		2.29253
5430416N02Rik	3.66103	0.563998	0.154054	1.47836		2.29253
G2e3	3.6571	0.428561	0.117186	1.34589		2.29253
6720489N17Rik	3.65656	0.178754	0.0488858	1.13191		2.29253
Edem1	3.65194	0.338407	0.0926648	1.26436		2.29253
Rfc1	3.64684	0.375453	0.102953	1.29725		2.29253
Stip1	3.64347	0.415261	0.113974	1.33354		2.29253
Dscc1	3.64295	0.74926	0.205674	1.68093		2.29253
Wdr82	3.63998	0.293938	0.0807525	1.22598		2.29253
Hvcn1	3.63937	0.480406	0.132003	1.39514		2.29253
Pccb	3.63857	0.339403	0.0932792	1.26523		2.29253
Zwilch	3.63608	0.997731	0.274398	1.99686		2.29253
Zfp386	3.635	0.18518	0.0509437	1.13696		2.29253
Gen1	3.63179	0.700915	0.192994	1.62554		2.29253
Rcn1	3.63172	0.255082	0.0702372	1.1934		2.29253
BC086760	3.6289	0.297304	0.0819269	1.22885		2.29253
Zgrf1	3.62715	0.463597	0.127813	1.37898		2.29253
Rbmx2	3.62139	0.329984	0.0911207	1.257		2.29253
Fancg	3.61516	0.513261	0.141975	1.42727		2.29253
Rangap1	3.61501	0.355388	0.0983091	1.27933		2.29253
Slc46a3	3.61376	0.364414	0.100841	1.28736		2.29253
Pycrl	3.6113	0.346291	0.0958912	1.27129		2.29253
Calu	3.60781	0.266068	0.0737479	1.20253		2.29253
Dut	3.60761	0.506789	0.140478	1.42088		2.29253
Pask	3.59886	0.435605	0.12104	1.35248		2.29253
Col18a1	3.59837	0.452838	0.125846	1.36873		2.29253
Pknox2	3.59691	0.616485	0.171393	1.53314		2.29253
Maged1	3.59445	0.206152	0.0573529	1.15361		2.29253
Ogn	3.5928	1.53217	0.426455	2.8922		2.29253
Trpv4	3.58788	0.342919	0.0955771	1.26832		2.29253
Megf6	3.58722	0.519351	0.144778	1.43331		2.29253
Ptchd4	3.58229	0.45915	0.128172	1.37473		2.29253
Kcne4	3.58199	0.925501	0.258376	1.89934		2.29253
Prpf19	3.57742	0.259394	0.0725087	1.19698		2.29253
Pisd-ps3	3.5741	0.587511	0.16438	1.50265		2.29253
Haus5	3.57378	0.784615	0.219547	1.72263		2.29253
Bard1	3.57251	0.419886	0.117533	1.33782		2.29253
Mmp19	3.57144	0.250333	0.0700931	1.18948		2.29253
Steap1	3.56145	0.532182	0.149428	1.44612		2.29253
Dgat2	3.56081	0.252287	0.0708509	1.19109		2.29253
2310001H17Rik	3.55884	0.57201	0.16073	1.48659		2.29253
Tinf2	3.55802	0.520506	0.146291	1.43446		2.29253
Slc25a40	3.55597	0.31213	0.0877765	1.24154		2.29253
Atad5	3.55117	0.550617	0.155052	1.46471		2.29253
Phf19	3.54797	0.990778	0.279252	1.98726		2.29253
Pear1	3.54777	0.573827	0.161743	1.48847		2.29253
Mrpl49	3.54712	0.227291	0.0640777	1.17063		2.29253
Hsp90b1	3.54619	0.721603	0.203487	1.64901		2.29253
Serpinb1a	3.53571	0.617275	0.174583	1.53398		2.29253
Scfd1	3.534	0.322165	0.0911617	1.25021		2.29253
Pcsk9	3.53053	0.659802	0.186885	1.57987		2.29253
Toe1	3.52876	0.27511	0.0779623	1.21009		2.29253
Oip5	3.52851	0.814651	0.230877	1.75887		2.29253
Sema3a	3.52489	1.19619	0.339354	2.29133		2.29253
Tube1	3.52423	0.538045	0.15267	1.452		2.29253
Paip2b	3.52408	0.277152	0.0786453	1.2118		2.29253
Nup155	3.52339	0.396057	0.112408	1.31591		2.29253
Parp2	3.52332	0.314878	0.0893696	1.24391		2.29253
Qtrtd1	3.52277	0.272065	0.0772305	1.20754		2.29253
Ttc9c	3.52152	0.343671	0.0975917	1.26898		2.29253
Kctd7	3.52142	0.483742	0.137371	1.39837		2.29253
Pacsin2	3.51897	0.202206	0.0574618	1.15046		2.29253
Dnm1l	3.51656	0.331382	0.0942346	1.25822		2.29253
Tmtc2	3.51455	0.481718	0.137064	1.39641		2.29253
Gmds	3.51198	0.295496	0.0841396	1.22731		2.29253
Fam129a	3.51126	0.926721	0.263928	1.90095		2.29253
AK033756	3.51109	0.574619	0.163658	1.48928		2.29253
Tcerg1	3.50348	0.200653	0.0572725	1.14922		2.29253
Ccdc137	3.4985	0.298532	0.0853314	1.22989		2.29253
Mxd4	3.49807	0.543309	0.155317	1.45731		2.29253
Ergic1	3.49587	0.247785	0.0708792	1.18738		2.29253
Sf1	3.49531	0.175788	0.0502924	1.12958		2.29253
Hnrnpdl	3.49202	0.32761	0.0938167	1.25493		2.29253
Nmi	3.49082	0.2065	0.0591552	1.15389		2.29253
Rad18	3.49034	0.511831	0.146642	1.42586		2.29253
Uxs1	3.48944	0.392233	0.112406	1.31242		2.29253
Fads2	3.489	0.502015	0.143885	1.41619		2.29253
Sparc	3.48783	0.266713	0.0764695	1.20306		2.29253
AK189470	3.48775	0.362645	0.103977	1.28578		2.29253
Vcan	3.48689	0.252206	0.0723297	1.19103		2.29253
Nck1	3.48238	0.283196	0.0813227	1.21689		2.29253
Tecpr2	3.48191	0.250389	0.0719115	1.18953		2.29253
Mnda	3.47885	0.725254	0.208475	1.65319		2.91904
Sltm	3.4687	0.239231	0.0689684	1.18036		2.91904
Gdf11	3.46665	0.537006	0.154906	1.45096		2.91904
Elk1	3.46645	0.41012	0.118311	1.3288		2.91904
Rab15	3.45913	0.278038	0.080378	1.21254		2.91904
Rab39b	3.45837	0.414829	0.119949	1.33314		2.91904
Adgrg2	3.45832	0.337417	0.0975668	1.26349		2.91904
Mfap2	3.45599	0.900603	0.260592	1.86685		2.91904
BC024978	3.45598	0.237206	0.0686363	1.17871		2.91904
Rnaseh2a	3.45396	0.423215	0.12253	1.34091		2.91904
Lama4	3.45232	0.967548	0.280261	1.95551		2.91904
Garem	3.44945	0.70251	0.203659	1.62733		2.91904
Akna	3.44715	0.549828	0.159502	1.46391		2.91904
Ptx3	3.44141	0.363198	0.105538	1.28627		2.91904
Npy6r	3.4376	0.259016	0.0753478	1.19666		2.91904
Dnaja3	3.43594	0.293693	0.0854768	1.22577		2.91904
Anpep	3.43356	0.879193	0.256059	1.83935		2.91904
Tra2b	3.43239	0.223902	0.065232	1.16789		2.91904
Wwc1	3.43209	0.440795	0.128433	1.35735		2.91904
Tmem201	3.43151	0.284214	0.0828248	1.21775		2.91904
Dus3l	3.42992	0.224933	0.0655795	1.16872		2.91904
Fam45a	3.42849	0.317128	0.092498	1.24585		2.91904
Mtm1	3.42769	0.480185	0.14009	1.39492		2.91904
Trim35	3.42506	0.26494	0.0773534	1.20159		2.91904
Ric3	3.42481	0.211423	0.0617327	1.15783		2.91904
Igfbp4	3.42114	0.349006	0.102015	1.27368		2.91904
AK084494	3.41943	0.305765	0.0894197	1.23607		2.91904
Ttll5	3.41943	0.263036	0.076924	1.2		2.91904
Ewsr1	3.41814	0.277277	0.0811191	1.2119		2.91904
Extl1	3.41615	0.245405	0.0718369	1.18543		2.91904
Nbn	3.41132	0.400145	0.117299	1.31964		2.91904
Mki67	3.40891	1.51203	0.443552	2.8521		2.91904
Slc27a3	3.40682	0.528678	0.155182	1.44261		2.91904
Lin9	3.40601	0.289429	0.0849761	1.22216		2.91904
Dot1l	3.40553	0.362076	0.10632	1.28527		2.91904
Cep55	3.40369	1.22047	0.358572	2.33022		2.91904
Ccdc120	3.40095	0.292113	0.0858917	1.22443		2.91904
Sec14l1	3.39902	0.327356	0.0963089	1.25471		2.91904
BC030867	3.39862	0.921107	0.271024	1.89357		2.91904
Tubgcp3	3.3971	0.261685	0.0770319	1.19888		2.91904
Ilf3	3.39688	0.253883	0.07474	1.19241		2.91904
Cenpp	3.39431	0.522494	0.153932	1.43644		2.91904
Arhgap11a	3.39381	0.956309	0.281781	1.94034		2.91904
Ppat	3.39236	0.282524	0.0832826	1.21632		2.91904
Mapk7	3.38973	0.293835	0.0866839	1.22589		2.91904
Psmc3ip	3.38935	0.317679	0.0937286	1.24632		2.91904
2410002F23Rik	3.38878	0.538943	0.159038	1.45291		2.91904
Siah1b	3.38246	0.486131	0.143721	1.40068		2.91904
Gucy1b3	3.38208	0.279245	0.0825658	1.21356		2.91904
Pcdh11x	3.3816	0.617202	0.182518	1.5339		2.91904
Zbtb18	3.38144	0.444024	0.131312	1.36039		2.91904
Zfp282	3.37327	0.261903	0.0776408	1.19906		2.91904
Slc3a2	3.37295	0.441513	0.130898	1.35803		2.91904
Nup88	3.37192	0.198522	0.0588751	1.14752		2.91904
Tmlhe	3.37031	0.275657	0.08179	1.21055		2.91904
Bmi1	3.36876	0.193215	0.0573549	1.14331		2.91904
Sept7	3.36838	0.295717	0.087792	1.22749		2.91904
Lmf2	3.36652	0.325946	0.0968197	1.25349		2.91904
Stmn1	3.36616	0.934739	0.277687	1.91155		2.91904
Rhof	3.36524	0.192363	0.0571619	1.14263		2.91904
Slfn9	3.36264	1.0535	0.313296	2.07556		2.91904
Tbx15	3.36171	0.29587	0.0880118	1.22763		2.91904
Nova1	3.36165	0.510787	0.151945	1.42483		2.91904
Pfkp	3.36139	0.409128	0.121714	1.32788		2.91904
Ncstn	3.36124	0.255146	0.0759083	1.19346		2.91904
Scd1	3.36065	0.450594	0.13408	1.3666		2.91904
Scd2	3.35867	0.437886	0.130375	1.35462		2.91904
Snhg5	3.35776	0.421578	0.125553	1.33939		2.91904
Rab40b	3.35707	0.488478	0.145507	1.40296		2.91904
Pdk3	3.35707	0.303272	0.0903385	1.23394		2.91904
Hdhd3	3.35568	0.300051	0.089416	1.23119		2.91904
Kif14	3.35134	0.556206	0.165966	1.4704		2.91904
Tbl2	3.34655	0.572652	0.171117	1.48726		2.91904
Prpf38b	3.34634	0.249323	0.0745062	1.18865		2.91904
Rtn4rl1	3.34566	0.419433	0.125366	1.3374		2.91904
Palmd	3.3456	0.465356	0.139095	1.38066		2.91904
Ldhb	3.3438	0.275291	0.0823288	1.21024		2.91904
Msh6	3.3436	0.319768	0.095636	1.24813		2.91904
Arl6ip6	3.34318	0.190594	0.0570099	1.14123		2.91904
Fus	3.33938	0.333715	0.0999335	1.26025		2.91904
Ifi202b	3.33413	0.699803	0.209891	1.62428		2.91904
Ctf1	3.33336	0.449553	0.134865	1.36562		2.91904
Prl6a1	3.33316	0.408373	0.122519	1.32719		2.91904
Twist1	3.33244	0.390291	0.117119	1.31066		2.91904
Depdc7	3.33196	0.405383	0.121665	1.32444		2.91904
Ak4	3.32862	0.546536	0.164193	1.46057		2.91904
Ide	3.32795	0.236005	0.0709159	1.17773		2.91904
Zbtb7b	3.326	0.231788	0.0696898	1.17429		2.91904
Pde5a	3.325	0.911664	0.274185	1.88121		2.91904
Mgarp	3.32451	0.46714	0.140514	1.38237		2.91904
Gatsl2	3.32339	0.635374	0.191182	1.55334		2.91904
Knstrn	3.32152	0.914129	0.275215	1.88443		2.91904
Hnrnph1	3.31806	0.19504	0.0587811	1.14476		2.91904
Maoa	3.31777	0.38377	0.115671	1.30475		2.91904
Arl6ip1	3.31426	0.375089	0.113174	1.29692		2.91904
Tmem129	3.31357	0.290503	0.0876709	1.22307		2.91904
Prdm5	3.31249	0.248961	0.0751584	1.18835		2.91904
Mtmr2	3.30851	0.277169	0.0837745	1.21181		2.91904
Shmt1	3.30651	0.846602	0.256041	1.79826		2.91904
Ankle1	3.30631	0.672427	0.203377	1.59375		2.91904
Tlcd2	3.30443	0.39525	0.119612	1.31517		2.91904
Cpxm1	3.30185	0.675626	0.20462	1.59729		2.91904
Hspa5	3.30172	0.675665	0.20464	1.59733		2.91904
Mis18bp1	3.29656	1.06875	0.324203	2.09762		2.91904
Tob2	3.29469	0.323556	0.0982054	1.25141		2.91904
Ccnd1	3.29414	0.735843	0.223379	1.66537		2.91904
Rrm1	3.29351	0.272167	0.0826372	1.20762		2.91904
Isyna1	3.29196	0.464468	0.141092	1.37981		2.91904
Bmp6	3.29148	0.627957	0.190783	1.54538		2.91904
Aldh1l1	3.29068	0.487816	0.148242	1.40232		2.91904
Phgdh	3.28771	0.469327	0.142752	1.38446		2.91904
Ppp2r5a	3.2868	0.242824	0.0738785	1.18331		2.91904
Ppp2r3c	3.28626	0.214263	0.0651995	1.16011		2.91904
Slc7a6	3.27824	0.252921	0.0771515	1.19162		2.91904
Arhgap19	3.27559	0.588012	0.179513	1.50317		2.91904
Meg3	3.27542	0.208228	0.0635728	1.15527		2.91904
Eri1	3.26744	0.459795	0.14072	1.37535		2.91904
Gal3st1	3.26541	0.263559	0.0807125	1.20044		2.91904
Dnajc9	3.26198	0.454239	0.139253	1.37006		2.91904
Vash2	3.26057	0.3206	0.0983263	1.24885		2.91904
Bag4	3.25916	0.263146	0.0807404	1.20009		2.91904
Cdc27	3.24939	0.419913	0.129228	1.33785		2.91904
Nqo2	3.24921	0.41233	0.126902	1.33083		2.91904
Asl	3.24766	0.343095	0.105644	1.26847		2.91904
Mylk	3.2447	0.369722	0.113946	1.2921		2.91904
Sipa1	3.24383	0.350811	0.108147	1.27528		2.91904
Abcb6	3.24309	0.684066	0.21093	1.60666		2.91904
Rgag1	3.24275	0.556815	0.171711	1.47102		2.91904
2810032G03Rik	3.24054	0.835305	0.257767	1.78423		2.91904
Ascc2	3.23511	0.315877	0.0976402	1.24477		2.91904
Enox1	3.23163	0.773788	0.239442	1.70975		2.91904
Ssr3	3.23005	0.230471	0.0713524	1.17322		2.91904
Ube2q2	3.21937	0.25814	0.0801834	1.19594		2.91904
Ppp2r2c	3.21889	0.170506	0.0529704	1.12545		2.91904
Mum1l1	3.21622	1.08648	0.337813	2.12356		2.91904
Lipa	3.21451	0.736019	0.228968	1.66557		2.91904
Prim2	3.21432	0.592328	0.184278	1.50768		2.91904
Gripap1	3.20988	0.228759	0.0712673	1.17183		2.91904
Plcb1	3.20925	0.377664	0.11768	1.29924		2.91904
2900076A07Rik	3.20894	0.775197	0.241574	1.71142		2.91904
Cd34	3.20689	0.924092	0.288158	1.89749		2.91904
Kcnd1	3.20672	0.586573	0.18292	1.50167		2.91904
Gcdh	3.20651	0.222288	0.069324	1.16658		2.91904
Rnf24	3.20493	0.394314	0.123034	1.31432		2.91904
Aldh9a1	3.19889	0.306219	0.0957267	1.23646		2.91904
Enpp3	3.19334	0.780503	0.244416	1.71773		2.91904
Mmp3	3.19184	0.218002	0.0682997	1.16312		2.91904
Tnfaip6	3.18795	0.60719	0.190464	1.52329		2.91904
Lars	3.18506	0.296119	0.0929715	1.22784		2.91904
Cpa4	3.18484	0.154792	0.0486027	1.11326		2.91904
Rab35	3.18305	0.240814	0.0756551	1.18166		2.91904
Bcat2	3.18259	0.22931	0.0720515	1.17227		2.91904
Htra1	3.18221	0.722444	0.227026	1.64997		2.91904
Arhgef2	3.17927	0.380921	0.119814	1.30217		3.58323
Nde1	3.17885	0.291196	0.0916043	1.22365		3.58323
Tpi1	3.17766	0.565017	0.177809	1.4794		3.58323
Dusp14	3.1774	0.510032	0.160519	1.42408		3.58323
Armcx6	3.17733	0.211812	0.0666634	1.15814		3.58323
2810408I11Rik	3.17703	0.81584	0.256793	1.76032		3.58323
Maea	3.17382	0.223714	0.0704874	1.16774		3.58323
Wnt5b	3.17008	0.192208	0.060632	1.14251		3.58323
Klhl13	3.16996	0.772149	0.243583	1.70781		3.58323
Txndc5	3.16937	0.234118	0.0738688	1.17619		3.58323
Tmem131	3.16881	0.190717	0.0601857	1.14133		3.58323
Fmr1	3.16861	0.38916	0.122817	1.30963		3.58323
Gpr85	3.16832	0.26902	0.0849094	1.20499		3.58323
Khsrp	3.16309	0.207514	0.0656049	1.1547		3.58323
Slc43a3	3.16124	0.747695	0.23652	1.67911		3.58323
Actn3	3.15877	0.440376	0.139414	1.35696		3.58323
Pld2	3.15814	0.293041	0.092789	1.22522		3.58323
Gtf2h1	3.15586	0.293581	0.0930271	1.22568		3.58323
Arhgap20	3.15231	1.07186	0.340023	2.10214		3.58323
Glce	3.15169	0.391228	0.124133	1.31151		3.58323
Tnfaip8l1	3.14528	0.486195	0.154579	1.40075		3.58323
Nup50	3.14496	0.223449	0.07105	1.16752		3.58323
Zfp248	3.14486	0.29565	0.0940103	1.22744		3.58323
Mllt1	3.14474	0.177106	0.056318	1.13061		3.58323
Nampt	3.14379	0.214623	0.0682689	1.1604		3.58323
Pcdh9	3.14038	0.613354	0.195312	1.52981		3.58323
Ddx26b	3.13427	0.482311	0.153883	1.39698		3.58323
Ccdc34	3.13207	0.392318	0.125258	1.3125		3.58323
P3h1	3.13078	0.403452	0.128866	1.32267		3.58323
Sec11c	3.12912	0.376439	0.120302	1.29813		3.58323
Rcan2	3.12868	0.25605	0.0818397	1.1942		3.58323
Rmnd1	3.12804	0.183301	0.0585992	1.13548		3.58323
Spc24	3.12481	1.24582	0.398687	2.37153		3.58323
Rfx7	3.12207	0.506511	0.162236	1.42061		3.58323
Abhd17c	3.11725	0.42373	0.135931	1.34139		3.58323
Ccdc92	3.11706	0.246065	0.0789412	1.18597		3.58323
LOC100861615	3.11118	0.281882	0.090603	1.21578		3.58323
Osbpl1a	3.1094	0.577123	0.185606	1.49187		3.58323
Setd8	3.10888	0.358629	0.115356	1.28221		3.58323
Chchd10	3.10647	0.743396	0.239306	1.67411		3.58323
Chek2	3.1019	0.449868	0.14503	1.36592		3.58323
Mb21d1	3.10165	0.526353	0.169701	1.44028		3.58323
Cdkl2	3.10035	0.263986	0.085147	1.20079		3.58323
Gosr2	3.09591	0.153451	0.0495658	1.11223		3.58323
Rfc4	3.0949	0.291699	0.0942517	1.22408		3.58323
Slc9a9	3.09431	0.732587	0.236753	1.66162		3.58323
Suclg2	3.09403	0.410908	0.132807	1.32952		3.58323
Zmynd19	3.09203	0.265077	0.0857289	1.2017		3.58323
Fjx1	3.09	0.444793	0.143946	1.36112		3.58323
Nrip2	3.08943	0.303236	0.0981526	1.23391		3.58323
Creb3l1	3.08855	0.498056	0.161259	1.41231		3.58323
Bicd1	3.08818	0.16849	0.0545598	1.12388		3.58323
Tm9sf4	3.08613	0.322307	0.104437	1.25033		3.58323
Srsf7	3.08572	0.296985	0.0962449	1.22857		3.58323
Aspm	3.0823	0.871722	0.282815	1.82985		3.58323
Kars	3.08219	0.198059	0.0642592	1.14715		3.58323
Pabpc4l	3.07986	0.472031	0.153264	1.38706		3.58323
Dpf2	3.07957	0.256244	0.0832078	1.19437		3.58323
Phka1	3.07579	0.468409	0.152289	1.38358		3.58323
Pomt1	3.07395	0.422824	0.137551	1.34055		3.58323
Nup62	3.06924	0.207838	0.0677163	1.15496		3.58323
Tfrc	3.06648	0.814498	0.265613	1.75869		3.58323
Stt3a	3.06601	0.285632	0.0931608	1.21894		3.58323
Ddias	3.06523	0.564715	0.184233	1.4791		3.58323
Hspa14	3.06294	0.253055	0.0826185	1.19173		3.58323
Cgnl1	3.06188	0.552859	0.180562	1.46699		3.58323
Grb10	3.06065	0.543884	0.177702	1.45789		3.58323
Cfap36	3.06034	0.395318	0.129174	1.31523		3.58323
Gramd2	3.05904	0.350829	0.114686	1.27529		3.58323
Zfp280b	3.05835	0.371966	0.121623	1.29412		3.58323
Pcyox1l	3.05804	0.226751	0.0741492	1.1702		3.58323
Slc25a12	3.05722	0.209871	0.0686476	1.15658		3.58323
Dctd	3.05712	0.458368	0.149935	1.37399		3.58323
Papola	3.05709	0.306133	0.100139	1.23639		3.58323
Adgrg6	3.05631	0.914431	0.299195	1.88483		3.58323
Orc4	3.05448	0.227932	0.0746224	1.17116		3.58323
Usp46	3.05259	0.332323	0.108866	1.25904		3.58323
Fam131b	3.05215	0.501858	0.164428	1.41604		3.58323
Evl	3.05191	0.260977	0.0855129	1.19829		3.58323
Gna14	3.04884	0.853171	0.279835	1.80647		3.58323
Best1	3.04611	0.181678	0.0596428	1.1342		3.58323
Pgm2	3.04597	0.263069	0.086366	1.20003		3.58323
Gpsm2	3.04583	0.685939	0.225206	1.60875		3.58323
Kcnab2	3.0451	0.425839	0.139844	1.34335		3.58323
Serpinb9	3.04437	0.575341	0.188985	1.49003		3.58323
Adcy1	3.04131	0.649953	0.213708	1.56912		3.58323
Slc4a4	3.04124	0.669368	0.220097	1.59038		3.58323
Osbpl9	3.04087	0.23335	0.0767379	1.17556		3.58323
Egfl6	3.04017	1.60716	0.528643	3.04652		3.58323
Slc35g1	3.03951	0.296761	0.0976345	1.22838		3.58323
Dcps	3.03881	0.250833	0.0825431	1.18989		3.58323
Aldh3b1	3.03361	0.605953	0.199746	1.52198		3.58323
Gstz1	3.03322	0.203416	0.0670626	1.15142		3.58323
Cmc2	3.03316	0.371881	0.122605	1.29404		3.58323
Limch1	3.03129	0.579245	0.191089	1.49407		3.58323
Nudt11	3.03101	0.342876	0.113123	1.26828		3.58323
Ufsp2	3.02874	0.280916	0.0927501	1.21497		3.58323
Gramd1b	3.02855	0.479075	0.158186	1.39385		3.58323
Pafah2	3.02812	0.353012	0.116578	1.27722		3.58323
Mpv17	3.02753	0.158373	0.0523109	1.11603		3.58323
Zfp934	3.02372	0.217896	0.0720622	1.16304		3.58323
Slc26a7	3.02302	0.81184	0.268553	1.75545		3.58323
Cox14	3.02249	0.257298	0.0851279	1.19524		3.58323
Tigd2	3.02238	0.270961	0.0896516	1.20661		3.58323
Hoxa10	3.02223	0.421373	0.139425	1.3392		3.58323
Lyplal1	3.0219	0.223266	0.0738827	1.16737		3.58323
Zfp335	3.02124	0.159563	0.0528139	1.11695		3.58323
Ercc4	3.01921	0.16825	0.0557265	1.12369		3.58323
Mbp	3.01818	0.63499	0.210388	1.55293		3.58323
Xrcc6	3.01754	0.386951	0.128234	1.30763		3.58323
Drp2	3.01592	0.173785	0.0576228	1.12801		3.58323
Pak4	3.0109	0.164141	0.0545154	1.1205		3.58323
Plxna4	3.00871	0.53818	0.178874	1.45214		3.58323
Noc3l	3.00293	0.181687	0.0605031	1.13421		3.58323
Paqr7	3.00138	0.397808	0.132542	1.31751		3.58323
Tro	2.99907	0.280656	0.0935808	1.21475		3.58323
Palb2	2.99798	0.303131	0.101112	1.23382		3.58323
Capza1	2.99576	0.173244	0.0578297	1.12759		3.58323
Brms1l	2.98938	0.18535	0.062003	1.13709		3.58323
Tars	2.98324	0.387002	0.129726	1.30767		3.58323
Hyou1	2.98116	0.377697	0.126694	1.29927		3.58323
1500015O10Rik	2.98012	0.793774	0.266356	1.7336		3.58323
Brca2	2.97979	0.347573	0.116643	1.27242		3.58323
Plxnb2	2.97968	0.317668	0.106612	1.24631		3.58323
Ccdc93	2.97941	0.266427	0.089423	1.20283		3.58323
Isg20	2.97792	0.331366	0.111274	1.2582		3.58323
Ddx56	2.97773	0.194169	0.065207	1.14406		3.58323
Tbl1xr1	2.97657	0.24602	0.0826523	1.18593		3.58323
Lacc1	2.97613	0.375895	0.126303	1.29764		3.58323
Mcc	2.97558	0.271121	0.0911152	1.20674		3.58323
Hmox1	2.97503	0.469033	0.157657	1.38418		3.58323
Hsd17b14	2.97494	0.259303	0.0871623	1.1969		3.58323
Tbrg4	2.97429	0.298407	0.100329	1.22979		3.58323
Iba57	2.97053	0.188923	0.0635991	1.13991		3.58323
Ckap5	2.96735	0.249259	0.0840007	1.1886		3.58323
Lonrf2	2.96716	0.379478	0.127892	1.30087		3.58323
Top2b	2.967	0.224572	0.07569	1.16843		3.58323
Mpzl3	2.96682	0.245677	0.0828083	1.18565		3.58323
Wdr60	2.96481	0.277061	0.0934499	1.21172		3.58323
Utp6	2.96242	0.16004	0.0540235	1.11732		3.58323
Cnot6	2.95996	0.275905	0.0932121	1.21075		3.58323
Pms2	2.95941	0.451738	0.152645	1.36769		3.58323
Neto2	2.95861	0.308696	0.104338	1.23859		3.58323
Atp13a2	2.95722	0.247294	0.0836237	1.18698		3.58323
Lap3	2.9549	0.318919	0.107929	1.2474		3.58323
Atrip	2.9545	0.206996	0.0700614	1.15428		3.58323
Dusp7	2.95294	0.309314	0.104748	1.23912		3.58323
Mcm8	2.95288	0.375142	0.127043	1.29697		3.58323
Orc3	2.95073	0.185611	0.0629033	1.1373		3.58323
Nceh1	2.95065	0.377224	0.127844	1.29884		3.58323
Creg1	2.94985	0.265956	0.0901591	1.20243		3.58323
Sort1	2.94937	0.69732	0.23643	1.62149		3.58323
Glt8d2	2.94885	0.538306	0.182548	1.45227		3.58323
Tmem86b	2.94605	0.354873	0.120457	1.27887		3.58323
Cdan1	2.94583	0.240764	0.0817305	1.18162		3.58323
Srek1	2.9456	0.414253	0.140634	1.33261		3.58323
Spon2	2.94402	0.488671	0.165988	1.40315		3.58323
Cyb5b	2.94332	0.304272	0.103377	1.2348		3.58323
1700010K23Rik	2.94129	0.833572	0.283403	1.78209		3.58323
Lifr	2.93733	0.234919	0.079977	1.17684		3.58323
Osbpl10	2.93661	0.246626	0.0839832	1.18643		3.58323
Rad23b	2.93602	0.271584	0.0925008	1.20713		3.58323
Mis18a	2.93592	0.525363	0.178943	1.4393		3.58323
Tceal5	2.9337	0.46291	0.157791	1.37832		3.58323
Tmem88	2.93143	0.190771	0.0650778	1.14137		3.58323
Tubg1	2.92946	0.319699	0.109132	1.24807		3.58323
Fam117a	2.92941	0.304029	0.103785	1.23459		3.58323
Casq2	2.92739	0.197975	0.0676285	1.14709		3.58323
Ripk3	2.92623	0.464486	0.158732	1.37983		3.58323
Glmn	2.92568	0.258922	0.0885	1.19658		3.58323
Taf8	2.92338	0.24865	0.0850556	1.18809		3.58323
Lgalsl	2.92226	0.266171	0.0910842	1.20261		3.58323
Dsn1	2.92204	0.523127	0.179028	1.43707		3.58323
Tspan6	2.92155	0.221552	0.0758336	1.16599		3.58323
Rtel1	2.9199	0.458623	0.157068	1.37423		3.58323
Cdc25b	2.91903	0.589553	0.201969	1.50478		3.58323
Zfp948	2.91838	0.418461	0.143388	1.3365		3.58323
Raf1	2.91749	0.182933	0.0627023	1.13519		3.58323
Snrnp25	2.91591	0.362738	0.124399	1.28586		3.58323
D6Wsu163e	2.91571	0.268324	0.0920271	1.20441		3.58323
Begain	2.91487	0.445864	0.152962	1.36213		3.58323
Gemin5	2.91407	0.233115	0.0799964	1.17537		3.58323
Ccdc138	2.91131	0.276871	0.0951017	1.21156		3.58323
March3	2.91121	0.295844	0.101622	1.2276		3.58323
Il1r1	2.90937	0.317621	0.109172	1.24627		3.58323
Apod	2.90707	1.26107	0.433794	2.39673		3.58323
DQ267101	2.9066	0.342378	0.117793	1.26784		3.58323
Rspo3	2.90441	1.04417	0.359512	2.06218		3.58323
Nans	2.90438	0.290463	0.100008	1.22303		3.58323
Men1	2.90427	0.199864	0.0688172	1.14859		3.58323
Nup93	2.90355	0.270749	0.0932475	1.20643		3.58323
Sap30	2.90286	0.504934	0.173944	1.41906		3.58323
Oxr1	2.90195	0.388135	0.13375	1.3087		3.58323
Fam221a	2.9013	0.429568	0.148061	1.34683		3.58323
AK134203	2.90126	0.317462	0.109422	1.24614		3.58323
Slc35f1	2.89794	0.34577	0.119316	1.27083		3.58323
Esyt1	2.89738	0.193422	0.0667576	1.14347		3.58323
Vimp	2.89715	0.432065	0.149135	1.34916		3.58323
Sf3a1	2.89708	0.268528	0.0926891	1.20458		3.58323
Glrb	2.89586	0.62668	0.216405	1.54401		3.58323
Acaa1b	2.891	0.32641	0.112905	1.25389		3.58323
Zfp956	2.89031	0.250699	0.0867377	1.18978		3.58323
Rpa3	2.89019	0.408892	0.141476	1.32767		3.58323
Syncrip	2.88985	0.160103	0.0554018	1.11737		3.58323
Sec24d	2.88868	0.449454	0.155591	1.36552		3.58323
Ppp1r9b	2.88761	0.303061	0.104952	1.23376		3.58323
Tmem217	2.88557	0.253762	0.0879416	1.19231		3.58323
Arhgap17	2.88471	0.269771	0.0935175	1.20562		3.58323
Ddc	2.88431	0.263717	0.0914313	1.20057		3.58323
Evi5l	2.8834	0.300309	0.104151	1.23141		3.58323
Slc12a8	2.88334	0.198095	0.0687033	1.14718		3.58323
Per1	2.88301	0.214424	0.074375	1.16024		3.58323
Gm20755	2.88263	0.290389	0.100738	1.22297		3.58323
Pip5k1c	2.88245	0.197237	0.0684268	1.1465		3.58323
Rassf2	2.88225	0.430343	0.149308	1.34755		3.58323
Oxct1	2.88142	0.339192	0.117717	1.26505		4.98377
Srsf2	2.88116	0.405437	0.14072	1.32449		4.98377
1700024P16Rik	2.87938	0.198238	0.0688473	1.1473		4.98377
Gamt	2.87793	0.41984	0.145883	1.33778		4.98377
4933431E20Rik	2.87746	0.269429	0.0936341	1.20533		4.98377
Fkbp14	2.87567	0.51529	0.17919	1.42928		4.98377
Rab3il1	2.87129	0.933628	0.32516	1.91007		4.98377
Rad54b	2.871	0.662283	0.23068	1.58259		4.98377
Lclat1	2.8676	0.534508	0.186395	1.44845		4.98377
Tapt1	2.86604	0.183395	0.0639888	1.13555		4.98377
Mrc2	2.86592	0.688595	0.24027	1.61171		4.98377
Ssrp1	2.86288	0.263343	0.0919854	1.20026		4.98377
Dnajb5	2.86145	0.279974	0.0978434	1.21417		4.98377
AK086852	2.85907	0.504445	0.176437	1.41858		4.98377
Hdac8	2.85839	0.248719	0.087014	1.18815		4.98377
3110057O12Rik	2.85793	0.454124	0.1589	1.36995		4.98377
Psmd2	2.85711	0.170697	0.0597445	1.1256		4.98377
Seh1l	2.85675	0.165281	0.0578564	1.12138		4.98377
Cpsf2	2.85661	0.187187	0.0655278	1.13854		4.98377
D430020J02Rik	2.85639	0.406689	0.142378	1.32564		4.98377
Srsf10	2.85612	0.245992	0.0861282	1.18591		4.98377
Snrnp40	2.85541	0.324403	0.11361	1.25215		4.98377
Tango2	2.85527	0.205699	0.0720417	1.15324		4.98377
Cdh26	2.85423	0.379033	0.132797	1.30047		4.98377
Rnf121	2.84955	0.174204	0.0611337	1.12834		4.98377
Abca8b	2.84912	0.421021	0.147773	1.33887		4.98377
Cpsf7	2.84884	0.220987	0.0775707	1.16553		4.98377
Daam2	2.84742	0.225923	0.0793428	1.16952		4.98377
Lysmd1	2.84389	0.15881	0.0558425	1.11637		4.98377
Serpine2	2.84356	0.252007	0.0886237	1.19086		4.98377
Map2	2.84322	0.56206	0.197685	1.47638		4.98377
Ddx4	2.84129	0.212087	0.0746444	1.15836		4.98377
Nphp3	2.83603	0.243366	0.0858122	1.18375		4.98377
Tmem8	2.83596	0.195613	0.0689761	1.14521		4.98377
Wrap53	2.83558	0.326117	0.115009	1.25363		4.98377
Trim63	2.83457	0.195598	0.0690046	1.1452		4.98377
9930104L06Rik	2.83294	0.166599	0.0588078	1.12241		4.98377
Scyl1	2.83206	0.178213	0.062927	1.13148		4.98377
Add3	2.83179	0.504553	0.178174	1.41868		4.98377
Rnf144a	2.82889	0.691957	0.244603	1.61547		4.98377
Sec23ip	2.82764	0.141867	0.0501716	1.10333		4.98377
Sorcs2	2.82271	0.851937	0.301815	1.80492		4.98377
Dner	2.81879	0.695788	0.246839	1.61977		4.98377
Polh	2.81843	0.452132	0.16042	1.36806		4.98377
Tsc22d2	2.81791	0.226036	0.0802143	1.16962		4.98377
Xylb	2.81744	0.222723	0.0790515	1.16693		4.98377
Riok1	2.81727	0.261732	0.0929027	1.19892		4.98377
Polq	2.81718	0.458355	0.1627	1.37397		4.98377
Egflam	2.8162	0.293055	0.10406	1.22523		4.98377
Adam22	2.81596	0.791083	0.280928	1.73037		4.98377
Cdc25a	2.81449	0.376012	0.133598	1.29775		4.98377
Calcrl	2.81406	0.355966	0.126496	1.27984		4.98377
Ank2	2.81381	0.722119	0.256634	1.6496		4.98377
Tmcc2	2.81265	0.243268	0.0864906	1.18367		4.98377
Fam13c	2.81241	0.395036	0.140462	1.31498		4.98377
Fads6	2.8121	0.157931	0.0561615	1.11569		4.98377
Tspan14	2.81199	0.230864	0.0821001	1.17354		4.98377
Postn	2.81128	0.602855	0.214441	1.51872		4.98377
Ankmy2	2.81117	0.241693	0.0859758	1.18238		4.98377
Nrg1	2.81025	0.893205	0.317838	1.8573		4.98377
Pfkl	2.80989	0.564378	0.200854	1.47875		4.98377
Hps5	2.80783	0.197536	0.0703516	1.14674		4.98377
Terf1	2.80513	0.420584	0.149934	1.33847		4.98377
Hsf2	2.80342	0.286173	0.10208	1.2194		4.98377
Eda	2.8034	0.33151	0.118253	1.25833		4.98377
Rps6ka2	2.80135	0.43784	0.156296	1.35457		4.98377
Cdk15	2.8013	0.592278	0.21143	1.50763		4.98377
Eif2ak3	2.80085	0.181726	0.0648826	1.13424		4.98377
Acvrl1	2.80068	0.203316	0.0725951	1.15134		4.98377
Slc7a8	2.79504	0.919502	0.328976	1.89146		4.98377
Kri1	2.79332	0.261003	0.0934382	1.19831		4.98377
Ppard	2.79288	0.240432	0.0860877	1.18135		4.98377
Dcn	2.79209	1.1559	0.413991	2.22823		4.98377
Ampd2	2.79186	0.357414	0.12802	1.28113		4.98377
Kcnt2	2.79145	0.622179	0.222888	1.5392		4.98377
Cnpy4	2.79109	0.282597	0.10125	1.21638		4.98377
Col1a2	2.78871	0.372794	0.13368	1.29486		4.98377
Asph	2.78554	0.387734	0.139195	1.30834		4.98377
Plscr1	2.78429	0.322336	0.11577	1.25035		4.98377
Zfp518a	2.78269	0.313377	0.112616	1.24261		4.98377
Srp54b	2.78134	0.24604	0.0884609	1.18595		4.98377
Hn1	2.78107	0.230684	0.0829478	1.17339		4.98377
Entpd5	2.78007	0.330058	0.118723	1.25706		4.98377
Hhipl1	2.77993	0.330688	0.118956	1.25761		4.98377
Mtx2	2.77858	0.29993	0.107943	1.23108		4.98377
Gmfb	2.77806	0.317731	0.114371	1.24637		4.98377
Epha1	2.77528	0.548609	0.197677	1.46267		4.98377
Chfr	2.77461	0.237553	0.0856169	1.17899		4.98377
Vcp	2.77455	0.259905	0.0936749	1.1974		4.98377
Arhgef16	2.77446	0.184357	0.066448	1.13631		4.98377
Copb2	2.77413	0.156531	0.0564254	1.1146		4.98377
G0s2	2.77355	0.735755	0.265275	1.66527		4.98377
Pcca	2.77285	0.185721	0.0669786	1.13739		4.98377
Trappc11	2.77201	0.241665	0.0871803	1.18236		4.98377
Myef2	2.77162	0.313696	0.113181	1.24289		4.98377
1600002H07Rik	2.77138	0.393671	0.142049	1.31373		4.98377
Hsf4	2.77128	0.195174	0.0704276	1.14486		4.98377
Il20rb	2.77064	0.23813	0.0859478	1.17946		4.98377
Syt11	2.76805	0.330724	0.119479	1.25764		4.98377
Mrps2	2.76785	0.25162	0.0909082	1.19054		4.98377
Xndc1	2.76685	0.359187	0.129818	1.2827		4.98377
Ccdc28b	2.76661	0.480286	0.173601	1.39502		4.98377
Clip4	2.76616	0.298549	0.107929	1.22991		4.98377
Cse1l	2.76543	0.289445	0.104665	1.22217		4.98377
Fam65c	2.7628	0.61701	0.223328	1.53369		4.98377
Hpgd	2.76249	0.623757	0.225795	1.54088		4.98377
Nphp4	2.7614	0.19151	0.0693527	1.14196		4.98377
Fzd5	2.76091	0.543341	0.196798	1.45734		4.98377
Sh3tc2	2.75953	0.272421	0.09872	1.20783		4.98377
Hacd2	2.75804	0.333634	0.120968	1.26018		4.98377
4930452B06Rik	2.75682	0.24968	0.0905682	1.18894		4.98377
Lypd6	2.75458	0.215184	0.0781187	1.16085		4.98377
Tlr7	2.75181	0.160363	0.0582755	1.11757		4.98377
Tmem79	2.75089	0.242799	0.0882619	1.18329		4.98377
Copb1	2.75079	0.165593	0.0601982	1.12163		4.98377
Fbln1	2.74683	0.893383	0.325241	1.85753		4.98377
Tsr1	2.74649	0.292862	0.106631	1.22507		4.98377
Eno3	2.74534	0.667023	0.242965	1.58779		4.98377
Ccbl2	2.745	0.230228	0.0838719	1.17302		4.98377
Copz2	2.74489	0.346437	0.126212	1.27142		4.98377
Rasl10a	2.74467	0.206044	0.0750707	1.15352		4.98377
Fkbp11	2.7436	0.450572	0.164227	1.36658		4.98377
Dus4l	2.74339	0.33196	0.121004	1.25872		4.98377
Smu1	2.74326	0.183539	0.0669052	1.13567		4.98377
Gabrb1	2.74236	0.460254	0.167831	1.37578		4.98377
Cdkn2c	2.74173	0.503567	0.183668	1.41771		4.98377
Sorcs1	2.74017	0.166814	0.0608771	1.12258		4.98377
Fam162a	2.73854	0.447873	0.163545	1.36403		4.98377
Smc4	2.7384	0.548649	0.200354	1.46272		4.98377
Ell2	2.73814	0.42301	0.154488	1.34072		4.98377
Fgl2	2.7379	1.16003	0.423693	2.23462		4.98377
Mcm7	2.73759	0.43085	0.157383	1.34803		4.98377
Pcdhgb8	2.73746	0.420372	0.153563	1.33827		4.98377
Evc2	2.7373	0.253551	0.0926281	1.19214		4.98377
Pigb	2.73675	0.516566	0.188751	1.43055		4.98377
Rfwd3	2.73643	0.474176	0.173283	1.38912		4.98377
Scamp2	2.73642	0.206215	0.0753592	1.15366		4.98377
Tia1	2.735	0.319475	0.11681	1.24788		4.98377
Cdkn2d	2.73407	0.434845	0.159047	1.35177		4.98377
Tmem87a	2.73386	0.198024	0.0724338	1.14713		4.98377
Dars2	2.73237	0.246811	0.0903286	1.18658		4.98377
1110001J03Rik	2.73134	0.429318	0.157182	1.3466		4.98377
Aldh1a7	2.72972	0.463797	0.169907	1.37917		4.98377
Fzr1	2.72791	0.280079	0.102671	1.21426		4.98377
Clcn2	2.72749	0.171592	0.0629122	1.1263		4.98377
Fbxo34	2.72542	0.318326	0.116799	1.24688		4.98377
Agk	2.72425	0.182742	0.0670798	1.13504		4.98377
Ankrd13a	2.72419	0.216663	0.0795331	1.16204		4.98377
P3h2	2.72033	0.691852	0.254326	1.61536		4.98377
Matn3	2.71929	0.352768	0.129728	1.27701		4.98377
Etfdh	2.71887	0.205016	0.0754051	1.1527		4.98377
Wdr41	2.71881	0.204069	0.0750582	1.15194		4.98377
Hars	2.71869	0.293629	0.108004	1.22572		4.98377
Znf512b	2.71858	0.517411	0.190324	1.43138		4.98377
Nup205	2.71706	0.386462	0.142235	1.30718		4.98377
Hdac9	2.71535	0.25085	0.092382	1.18991		4.98377
Sel1l	2.71338	0.429678	0.158356	1.34693		4.98377
Prr3	2.71149	0.236734	0.0873077	1.17832		4.98377
Gpx3	2.71024	0.298684	0.110206	1.23002		4.98377
AK135004	2.7102	0.296666	0.109463	1.2283		4.98377
Adcyap1r1	2.70906	0.220765	0.0814914	1.16535		4.98377
Casp8ap2	2.70898	0.458761	0.169348	1.37436		4.98377
Myl4	2.7078	0.28665	0.105861	1.2198		4.98377
2700029M09Rik	2.70775	0.322437	0.119079	1.25044		4.98377
Pdzd2	2.70724	0.35948	0.132785	1.28296		4.98377
2700097O09Rik	2.70639	0.352768	0.130346	1.27701		4.98377
Pitx2	2.70446	0.258524	0.0955918	1.19625		4.98377
Slc18b1	2.70424	0.505538	0.186942	1.41965		4.98377
Icosl	2.70368	0.790563	0.292402	1.72975		4.98377
Igdcc4	2.70315	0.540943	0.200116	1.45492		4.98377
Nop58	2.70307	0.325968	0.120592	1.25351		4.98377
Ccdc69	2.70248	0.180309	0.0667196	1.13313		4.98377
Prnd	2.70167	0.220426	0.0815887	1.16508		4.98377
Taf1	2.69881	0.218788	0.0810683	1.16376		4.98377
Gtf3c6	2.69654	0.318471	0.118103	1.24701		4.98377
Akap17b	2.69651	0.237611	0.0881181	1.17904		4.98377
Cdc123	2.6965	0.229001	0.0849253	1.17202		4.98377
Rpn1	2.69258	0.317347	0.11786	1.24604		4.98377
Ptprm	2.69077	0.321723	0.119565	1.24982		4.98377
Nudt1	2.6901	0.49148	0.182699	1.40589		4.98377
Exosc8	2.68915	0.459643	0.170925	1.3752		4.98377
Mmp23	2.6865	0.282729	0.105241	1.21649		4.98377
Rap1gap	2.6853	0.74818	0.27862	1.67967		4.98377
Dnm2	2.6823	0.200891	0.0748952	1.14941		4.98377
Mapre2	2.6814	0.338484	0.126234	1.26443		4.98377
Psmd11	2.6809	0.231102	0.0862033	1.17373		4.98377
Clasp2	2.68053	0.265826	0.0991693	1.20232		4.98377
AK138781	2.67886	0.365736	0.136527	1.28854		4.98377
Herc3	2.67723	0.256021	0.0956291	1.19418		4.98377
Fbxl7	2.67572	0.95677	0.357575	1.94096		4.98377
Ifi204	2.67526	0.259445	0.0969794	1.19702		4.98377
BC010587	2.67289	0.53057	0.198501	1.4445		4.98377
Crmp1	2.67235	0.170032	0.0636264	1.12508		4.98377
Dynlt1b	2.67148	0.268157	0.100378	1.20427		4.98377
Tbce	2.67143	0.245267	0.0918112	1.18531		4.98377
Ap3d1	2.67124	0.179261	0.0671079	1.1323		4.98377
Aldh7a1	2.67091	0.320674	0.120062	1.24891		4.98377
Hoga1	2.6707	0.243401	0.0911373	1.18378		4.98377
Kcns1	2.67035	0.180235	0.067495	1.13307		4.98377
Hnrnpr	2.67019	0.336638	0.126073	1.26281		4.98377
Rbmx	2.66902	0.25298	0.094784	1.19167		4.98377
Rad51c	2.66856	0.326321	0.122284	1.25381		4.98377
Btbd11	2.66811	0.337675	0.12656	1.26372		4.98377
Tmpo	2.66745	0.638173	0.239245	1.55636		4.98377
Paqr8	2.66516	0.201273	0.07552	1.14971		4.98377
Tbk1	2.66473	0.248287	0.0931752	1.1878		4.98377
Gabra4	2.66411	0.357148	0.134059	1.28089		4.98377
Klhl29	2.66392	0.614602	0.230713	1.53114		4.98377
Ttyh2	2.66352	0.325545	0.122224	1.25314		4.98377
Gm10560	2.66333	0.221686	0.0832365	1.1661		4.98377
Aldh2	2.66319	0.210543	0.0790566	1.15712		4.98377
Tdp2	2.66215	0.318483	0.119633	1.24702		4.98377
Prune2	2.66197	0.341429	0.128262	1.26701		4.98377
Ephb2	2.66008	0.353273	0.132805	1.27746		4.98377
Tbc1d20	2.65983	0.396464	0.149056	1.31628		4.98377
Ppil1	2.65882	0.554246	0.208456	1.4684		4.98377
Tatdn1	2.65816	0.242293	0.0911507	1.18287		4.98377
Taf1a	2.65811	0.18228	0.0685751	1.13468		4.98377
Entpd6	2.65778	0.313367	0.117906	1.2426		4.98377
Lman2	2.65655	0.244476	0.0920278	1.18466		4.98377
Cnrip1	2.65149	0.269628	0.101689	1.2055		4.98377
Ssh2	2.64911	0.384376	0.145096	1.3053		4.98377
Msantd3	2.64867	0.32899	0.124209	1.25613		4.98377
Zfp110	2.64568	0.247702	0.0936253	1.18731		4.98377
Cyp4f17	2.64525	0.229665	0.0868218	1.17256		4.98377
AI450353	2.64462	0.170257	0.0643786	1.12526		4.98377
Slc38a2	2.64447	0.239976	0.0907465	1.18097		4.98377
L1cam	2.64339	0.261365	0.0988748	1.19861		4.98377
Ranbp9	2.64205	0.227907	0.0862612	1.17113		4.98377
Lamc1	2.64195	0.668151	0.252901	1.58904		4.98377
Rap2c	2.6409	0.17521	0.0663449	1.12913		4.98377
Adam12	2.63899	0.283714	0.107508	1.21732		4.98377
Pelp1	2.6383	0.232585	0.0881573	1.17494		4.98377
Tnn	2.63792	0.325132	0.123253	1.25278		4.98377
Kdm4a	2.63625	0.403211	0.152949	1.32245		4.98377
Srpx	2.6356	0.348652	0.132286	1.27337		4.98377
Tsfm	2.63468	0.216986	0.0823578	1.1623		4.98377
Lzts1	2.63338	0.144894	0.0550219	1.10565		4.98377
Fopnl	2.62972	0.245648	0.0934122	1.18562		4.98377
Rrp1b	2.62893	0.241961	0.0920379	1.1826		4.98377
Gm9833	2.62892	0.381946	0.145286	1.3031		4.98377
Ccdc8	2.62843	0.375981	0.143044	1.29772		4.98377
Thumpd2	2.62806	0.242141	0.092137	1.18275		4.98377
Ttf2	2.62748	0.464122	0.176642	1.37948		4.98377
Rgma	2.62715	0.760687	0.289548	1.6943		4.98377
Atp6v1a	2.62631	0.2656	0.10113	1.20214		4.98377
Hsph1	2.62448	0.375361	0.143023	1.29716		4.98377
Acat1	2.62273	0.372685	0.142098	1.29476		4.98377
Smc6	2.62131	0.339827	0.12964	1.2656		4.98377
Mknk2	2.61968	0.18773	0.0716617	1.13897		4.98377
Rps6ka6	2.61963	0.291026	0.111094	1.22351		4.98377
Bmp3	2.61942	1.30229	0.497169	2.46621		4.98377
Unc119	2.61808	0.440352	0.168197	1.35694		4.98377
Nab1	2.61774	0.269938	0.103119	1.20576		4.98377
Psmd5	2.61651	0.270382	0.103337	1.20613		4.98377
Tarsl2	2.61625	0.568692	0.21737	1.48318		4.98377
Nfib	2.61601	0.697257	0.266535	1.62142		4.98377
Ppp1r8	2.61598	0.430246	0.164468	1.34746		4.98377
Sla	2.61537	0.315271	0.120546	1.24425		4.98377
Vps16	2.61527	0.181005	0.0692106	1.13367		4.98377
Sfrp2	2.6147	0.836626	0.31997	1.78587		4.98377
AK043032	2.61346	0.233392	0.0893038	1.1756		4.98377
AK087604	2.61266	0.16412	0.0628171	1.12048		4.98377
Spta1	2.61248	0.289415	0.110782	1.22214		4.98377
Zhx3	2.61085	0.477732	0.182979	1.39255		4.98377
Nacc1	2.60952	0.29342	0.112442	1.22554		4.98377
Nudt10	2.60789	0.187442	0.0718749	1.13874		4.98377
Clu	2.6073	0.548884	0.210518	1.46295		4.98377
Mettl9	2.60652	0.278561	0.106871	1.21298		4.98377
Cep70	2.60612	0.259173	0.0994478	1.19679		4.98377
Fbxl16	2.60609	0.376875	0.144613	1.29853		4.98377
Cntrob	2.6046	0.331405	0.127238	1.25824		4.98377
Pfkfb2	2.60447	0.228984	0.0879195	1.17201		4.98377
Inip	2.60244	0.141904	0.0545273	1.10336		4.98377
Fip1l1	2.60185	0.222584	0.085548	1.16682		4.98377
Ash2l	2.60127	0.255904	0.0983764	1.19408		4.98377
Zfp191	2.60024	0.292047	0.112315	1.22438		4.98377
Hif1a	2.59818	0.387247	0.149045	1.30789		4.98377
Fkbp9	2.59634	0.200994	0.0774144	1.14949		4.98377
Nipsnap1	2.59564	0.388867	0.149815	1.30936		4.98377
Tob1	2.59538	0.337733	0.130129	1.26377		4.98377
Erlin1	2.59522	0.234279	0.0902732	1.17632		4.98377
Adam23	2.59469	0.746112	0.287553	1.67727		4.98377
Plxna3	2.59431	0.640226	0.246781	1.55857		4.98377
Sgsm2	2.59231	0.458848	0.177004	1.37444		4.98377
Rmi1	2.5918	0.163787	0.0631944	1.12022		4.98377
Oat	2.59	0.26265	0.101409	1.19968		4.98377
Adgrl4	2.58964	0.185118	0.0714842	1.13691		4.98377
Hmgn2	2.58806	0.423863	0.163776	1.34151		4.98377
Dcaf12l2	2.58715	0.199949	0.0772855	1.14866		4.98377
Hsd17b1	2.58692	0.411742	0.159163	1.33029		4.98377
Dpy19l1	2.58674	0.747162	0.288844	1.67849		4.98377
Htatsf1	2.58327	0.142661	0.0552249	1.10394		4.98377
Slc1a3	2.58272	0.836784	0.323993	1.78606		4.98377
Fxn	2.58267	0.297589	0.115225	1.22909		4.98377
Ipo4	2.58011	0.241704	0.09368	1.18239		4.98377
Ccdc3	2.57855	0.720124	0.279275	1.64732		5.94964
Arhgef3	2.57653	0.336267	0.130511	1.26249		5.94964
Slc16a4	2.57643	0.247476	0.0960536	1.18713		5.94964
Polr3g	2.57586	0.288841	0.112134	1.22166		5.94964
Cyth3	2.5757	0.263152	0.102167	1.2001		5.94964
Hey2	2.57551	0.473371	0.183797	1.38835		5.94964
Pycr1	2.57532	0.327127	0.127024	1.25451		5.94964
A630089N07Rik	2.57377	0.318219	0.123639	1.24679		5.94964
Pgm1	2.57313	0.131845	0.0512393	1.09569		5.94964
Tbpl1	2.57267	0.215033	0.0835838	1.16073		5.94964
Setd1a	2.57187	0.272456	0.105937	1.20786		5.94964
Glb1	2.57177	0.179763	0.0698988	1.1327		5.94964
Wbp4	2.57072	0.153397	0.0596711	1.11219		5.94964
Leng1	2.56934	0.260696	0.101464	1.19806		5.94964
Xpo1	2.56879	0.249675	0.0971958	1.18894		5.94964
Map1a	2.56643	0.410108	0.159797	1.32879		5.94964
Ncoa7	2.56633	0.291122	0.113439	1.22359		5.94964
Trub1	2.56535	0.250461	0.0976323	1.18959		5.94964
5530601H04Rik	2.56307	0.143219	0.0558779	1.10437		5.94964
Hmgb3	2.56198	0.343854	0.134214	1.26914		5.94964
Ifit2	2.5615	0.747171	0.291693	1.6785		5.94964
Clec3b	2.56142	1.42829	0.557618	2.69128		5.94964
Uba2	2.56081	0.30272	0.118213	1.23347		5.94964
Nrep	2.56055	0.774613	0.302518	1.71073		5.94964
3110082I17Rik	2.55936	0.179736	0.070227	1.13268		5.94964
Sema3c	2.55803	0.556623	0.217598	1.47082		5.94964
Cadm4	2.55673	0.155281	0.060734	1.11364		5.94964
Kdm1a	2.55587	0.241284	0.0944038	1.18204		5.94964
Nsun4	2.55581	0.214523	0.0839357	1.16032		5.94964
Fbxo25	2.5555	0.364526	0.142644	1.28746		5.94964
Auts2	2.55356	0.914082	0.357964	1.88437		5.94964
Dnajc3	2.5535	0.229645	0.0899334	1.17255		5.94964
Kdm2b	2.55142	0.286853	0.112429	1.21998		5.94964
Sfxn1	2.55002	0.218909	0.0858459	1.16385		5.94964
Tspyl4	2.54994	0.434121	0.170248	1.35109		5.94964
Fbxo17	2.54785	0.373072	0.146426	1.29511		5.94964
Myo7a	2.54758	0.355156	0.139409	1.27912		5.94964
Gsr	2.54716	0.266383	0.10458	1.20279		5.94964
Mertk	2.54646	0.42862	0.16832	1.34595		5.94964
Fam53c	2.54618	0.233573	0.0917346	1.17574		5.94964
Zc3h8	2.54595	0.251268	0.0986935	1.19025		5.94964
Primpol	2.54531	0.361317	0.141954	1.2846		5.94964
Gas1	2.54524	1.13412	0.445585	2.19484		5.94964
Depdc1b	2.54522	0.618308	0.242929	1.53507		5.94964
Creld1	2.54411	0.343126	0.134871	1.2685		5.94964
Spink2	2.54403	0.276271	0.108596	1.21106		5.94964
Lyz2	2.54231	0.413425	0.162618	1.33184		5.94964
Panx3	2.54119	0.2528	0.0994811	1.19152		5.94964
Ptdss1	2.54077	0.156184	0.061471	1.11434		5.94964
Elovl5	2.54069	0.244503	0.0962346	1.18468		5.94964
Ptger3	2.54037	0.575504	0.226544	1.4902		5.94964
Itm2a	2.5391	0.627568	0.247161	1.54496		5.94964
Fam102b	2.53852	0.500725	0.197251	1.41492		5.94964
Gins3	2.53802	0.253955	0.10006	1.19247		5.94964
Itpk1	2.53784	0.326867	0.128797	1.25429		5.94964
Ppil4	2.53747	0.216253	0.0852241	1.16171		5.94964
Ulbp1	2.53603	1.05224	0.414917	2.07375		5.94964
Slc35e2	2.53516	0.218547	0.0862065	1.16356		5.94964
Rbp1	2.53498	0.36087	0.142356	1.2842		5.94964
Guf1	2.53495	0.252598	0.0996463	1.19135		5.94964
Fam102a	2.53367	0.33029	0.13036	1.25727		5.94964
AK009182	2.53346	0.535368	0.211319	1.44931		5.94964
Tlr4	2.53287	0.310141	0.122446	1.23983		5.94964
Ankrd27	2.5308	0.174267	0.0688585	1.12839		5.94964
LOC106740	2.53047	0.30459	0.120369	1.23507		5.94964
Pdhx	2.52993	0.361924	0.143057	1.28514		5.94964
Zfp131	2.52937	0.256144	0.101268	1.19428		5.94964
Sdk1	2.52913	0.537434	0.212498	1.45139		5.94964
Mastl	2.52906	0.737553	0.291632	1.66735		5.94964
Chka	2.52883	0.324877	0.12847	1.25256		5.94964
Prkra	2.52865	0.192324	0.0760579	1.1426		5.94964
Gnpnat1	2.52849	0.405275	0.160283	1.32434		5.94964
Tesk2	2.5278	0.173894	0.0687927	1.1281		5.94964
Qtrt1	2.52775	0.163935	0.064854	1.12034		5.94964
Ano6	2.52673	0.273692	0.108318	1.2089		5.94964
Adi1	2.52462	0.249662	0.0988908	1.18893		5.94964
Arap1	2.52142	0.507805	0.201396	1.42189		5.94964
Gorasp1	2.51888	0.186534	0.0740542	1.13803		5.94964
Fndc1	2.51861	0.760293	0.301871	1.69383		5.94964
Sept6	2.51803	0.534728	0.21236	1.44867		5.94964
Dzip1	2.51625	0.457223	0.181708	1.3729		5.94964
Tulp3	2.51598	0.27098	0.107703	1.20663		5.94964
AK203706	2.51455	0.621686	0.247236	1.53867		5.94964
B230217C12Rik	2.51404	0.324862	0.129219	1.25254		5.94964
Brat1	2.51365	0.144019	0.0572947	1.10498		5.94964
AK044789	2.51239	0.244993	0.0975141	1.18509		5.94964
Katnal2	2.51077	0.309528	0.12328	1.2393		5.94964
Lpar2	2.51065	0.266341	0.106085	1.20275		5.94964
Mavs	2.51037	0.223986	0.0892242	1.16796		5.94964
Gpatch1	2.51037	0.185509	0.0738972	1.13722		5.94964
Man1b1	2.50824	0.200221	0.0798255	1.14887		5.94964
Loxl4	2.50743	0.332612	0.132651	1.25929		5.94964
Uhrf1bp1	2.50668	0.480848	0.191827	1.39556		5.94964
Ensa	2.50656	0.190054	0.0758229	1.14081		5.94964
AK054245	2.50555	0.341672	0.136366	1.26722		5.94964
Uba3	2.50418	0.336204	0.134257	1.26243		5.94964
Kcns3	2.50389	0.56444	0.225425	1.47881		5.94964
Gna12	2.50186	0.356026	0.142305	1.2799		5.94964
Ino80	2.50178	0.226442	0.0905124	1.16995		5.94964
Pop5	2.50023	0.218297	0.0873105	1.16336		5.94964
Reps2	2.50005	0.500031	0.200008	1.41424		5.94964
Tshz1	2.49991	0.335636	0.134259	1.26193		5.94964
Kbtbd6	2.49608	0.224223	0.0898301	1.16815		5.94964
Lbr	2.49592	0.254634	0.10202	1.19303		5.94964
Pxmp4	2.49582	0.231455	0.092737	1.17402		5.94964
Pdxp	2.49567	0.551426	0.220953	1.46553		5.94964
Ppp5c	2.49563	0.309109	0.12386	1.23894		5.94964
St3gal4	2.49532	0.130271	0.0522062	1.0945		5.94964
C920009B18Rik	2.49369	0.618077	0.247856	1.53483		5.94964
Kitl	2.49298	0.493771	0.198064	1.40812		5.94964
Wfs1	2.49125	0.320756	0.128753	1.24898		5.94964
Glipr2	2.48977	0.256827	0.103153	1.19485		5.94964
Hexim2	2.48963	0.293761	0.117994	1.22583		5.94964
AW551984	2.48904	0.678974	0.272785	1.601		5.94964
Bco1	2.48828	0.151536	0.0608999	1.11075		5.94964
Rabl3	2.48796	0.362368	0.145648	1.28553		5.94964
1810055G02Rik	2.48788	0.35961	0.144545	1.28308		5.94964
Ctbp1	2.48684	0.166772	0.0670617	1.12254		5.94964
Kctd16	2.48642	0.159061	0.0639717	1.11656		5.94964
Zbed4	2.48613	0.293681	0.118128	1.22576		5.94964
Dus2	2.48605	0.276306	0.111143	1.21109		5.94964
AI427809	2.48529	0.361948	0.145636	1.28516		5.94964
Zbtb14	2.485	0.192979	0.0776576	1.14312		5.94964
Gga2	2.48345	0.185051	0.0745138	1.13686		5.94964
Fem1b	2.48182	0.281516	0.113431	1.21547		5.94964
Tvp23a	2.48053	0.304172	0.122624	1.23471		5.94964
I830012O16Rik	2.48032	0.446072	0.179844	1.36233		5.94964
Tpcn2	2.48016	0.318697	0.128499	1.2472		5.94964
Slc35e1	2.47902	0.209233	0.0844012	1.15607		5.94964
0610009O20Rik	2.47775	0.238913	0.0964235	1.1801		5.94964
Sh2d3c	2.4763	0.187318	0.0756444	1.13864		5.94964
Cubn	2.47565	0.163023	0.0658503	1.11963		5.94964
Ptprr	2.47323	0.41219	0.16666	1.3307		5.94964
Mlana	2.47291	0.437842	0.177055	1.35458		5.94964
Efna1	2.47123	0.29055	0.117573	1.22311		5.94964
Mob3b	2.47056	0.195982	0.0793269	1.1455		5.94964
Cpox	2.4699	0.269185	0.108986	1.20513		5.94964
Pdgfd	2.46838	0.69229	0.280463	1.61585		5.94964
Cox6a2	2.46642	0.760766	0.308449	1.69439		5.94964
6820431F20Rik	2.46495	0.587664	0.238408	1.50281		5.94964
Cnot3	2.46492	0.168339	0.0682941	1.12376		5.94964
Nipal2	2.46488	0.28055	0.113819	1.21466		5.94964
Fech	2.46357	0.221081	0.0897401	1.16561		5.94964
Ints9	2.46131	0.193942	0.0787963	1.14389		5.94964
Sec61a1	2.45882	0.184459	0.0750195	1.13639		5.94964
Magohb	2.45863	0.151572	0.0616492	1.11078		5.94964
Cenpt	2.45686	0.263373	0.107199	1.20028		5.94964
Prr22	2.45466	0.211762	0.0862693	1.1581		5.94964
Krt5	2.45354	0.699893	0.285259	1.62438		5.94964
Cxcl5	2.45015	0.343237	0.140088	1.2686		5.94964
Mpdz	2.4491	0.654563	0.267267	1.57414		5.94964
Robo2	2.44868	1.29477	0.528763	2.45338		5.94964
Gas2l3	2.44868	0.554586	0.226484	1.46875		5.94964
Zfp384	2.44757	0.280672	0.114673	1.21476		5.94964
Fsd1l	2.44738	0.35098	0.143411	1.27543		5.94964
Rtf1	2.44663	0.230748	0.0943123	1.17344		5.94964
Ltv1	2.44529	0.261704	0.107024	1.19889		5.94964
Ndufa4l2	2.44148	0.540819	0.221513	1.4548		5.94964
Atxn2l	2.4403	0.262084	0.107398	1.19921		5.94964
Xpo5	2.43955	0.143231	0.0587121	1.10438		5.94964
Rit1	2.43943	0.130953	0.0536818	1.09502		5.94964
Mtdh	2.43824	0.194007	0.0795687	1.14394		5.94964
Arfip2	2.43802	0.241262	0.098958	1.18203		5.94964
Ptgir	2.43761	0.550519	0.225843	1.46461		5.94964
Usp2	2.43701	0.224717	0.0922099	1.16855		5.94964
Lzts3	2.43647	0.373408	0.153258	1.29541		5.94964
2700049A03Rik	2.43552	0.378273	0.155315	1.29978		5.94964
Prpf3	2.43515	0.342267	0.140553	1.26775		5.94964
Agtpbp1	2.43428	0.247135	0.101523	1.18685		5.94964
Armc7	2.43394	0.1284	0.0527539	1.09308		5.94964
Slc1a5	2.43281	0.359076	0.147598	1.2826		5.94964
Msi2	2.43271	0.165817	0.0681613	1.1218		5.94964
Slc25a39	2.43188	0.288394	0.118589	1.22128		5.94964
4930558J18Rik	2.43166	0.298028	0.122561	1.22946		5.94964
Heatr3	2.43044	0.230922	0.0950125	1.17359		5.94964
Wdr45b	2.43003	0.19956	0.0821226	1.14835		5.94964
Ehhadh	2.42984	0.320022	0.131705	1.24835		5.94964
Pex5l	2.42912	0.693424	0.285463	1.61712		5.94964
Zc3hav1l	2.42883	0.418045	0.172118	1.33612		5.94964
Fam135a	2.42879	0.272859	0.112343	1.2082		5.94964
Pcdh10	2.42744	0.775188	0.319344	1.71141		5.94964
Wdr92	2.42705	0.151811	0.0625497	1.11096		5.94964
Pi4k2a	2.42702	0.265615	0.109441	1.20215		5.94964
Mettl10	2.42596	0.134636	0.055498	1.09782		5.94964
Dpysl5	2.42384	0.292774	0.120789	1.22499		5.94964
Pkn3	2.42329	0.353407	0.145838	1.27757		5.94964
Ccdc18	2.42311	0.312124	0.128811	1.24153		5.94964
Nars	2.42176	0.291686	0.120444	1.22407		5.94964
Prrt2	2.42169	0.478552	0.197611	1.39334		5.94964
Nxt1	2.42084	0.309315	0.127772	1.23912		5.94964
Cpped1	2.42051	0.15492	0.0640031	1.11336		5.94964
Axin1	2.42027	0.16314	0.0674057	1.11972		5.94964
Col14a1	2.41942	1.1035	0.4561	2.14875		5.94964
Tspan15	2.41766	0.242575	0.100335	1.1831		5.94964
Pik3ip1	2.41765	0.297537	0.123069	1.22904		5.94964
Zfp689	2.41662	0.189535	0.0784299	1.1404		5.94964
Nop14	2.41542	0.190421	0.0788354	1.1411		5.94964
Ptger2	2.41489	0.128407	0.0531732	1.09309		5.94964
Slc40a1	2.41465	0.809834	0.335384	1.75301		5.94964
Slc35b3	2.41442	0.266944	0.110562	1.20326		5.94964
Farsb	2.41342	0.372133	0.154193	1.29426		5.94964
Adhfe1	2.4126	0.22809	0.0945409	1.17128		5.94964
Rnf152	2.41218	0.434757	0.180234	1.35168		5.94964
Polr2b	2.41195	0.197886	0.082044	1.14702		5.94964
Krt18	2.41131	0.17585	0.0729273	1.12963		5.94964
Osr2	2.41008	1.1887	0.49322	2.27947		5.94964
Slc9b2	2.40942	0.335603	0.139288	1.2619		5.94964
Capn6	2.40796	1.14878	0.477076	2.21726		5.94964
Sh2d4a	2.40566	0.427799	0.17783	1.34518		5.94964
Anapc4	2.4051	0.205984	0.0856448	1.15347		5.94964
Arhgap1	2.40462	0.186789	0.0776794	1.13823		5.94964
Nol11	2.4029	0.212075	0.0882579	1.15835		5.94964
Tapbpl	2.40251	0.226035	0.0940825	1.16962		5.94964
Lama1	2.40168	0.374983	0.156134	1.29682		5.94964
Haus2	2.40098	0.157261	0.0654988	1.11517		5.94964
Eif3j2	2.40007	0.267611	0.111501	1.20381		5.94964
Phf12	2.39814	0.231412	0.0964963	1.17398		5.94964
Gm867	2.39793	0.311208	0.129782	1.24075		5.94964
Cherp	2.39775	0.175058	0.0730093	1.12901		5.94964
Scg2	2.39755	0.891249	0.371734	1.85478		5.94964
Mettl1	2.39598	0.180916	0.0755084	1.1336		5.94964
Sapcd2	2.39501	0.430355	0.179688	1.34757		5.94964
Acp5	2.39436	0.389284	0.162583	1.30974		5.94964
Cdc42ep3	2.39399	0.295368	0.123379	1.2272		5.94964
Reep4	2.39383	0.278376	0.116289	1.21283		5.94964
Arhgef39	2.3933	0.654237	0.273362	1.57378		5.94964
Dock4	2.39256	0.583365	0.243824	1.49834		5.94964
Fbxl19	2.39246	0.128932	0.0538912	1.09348		5.94964
Dgkd	2.39235	0.235825	0.0985745	1.17758		5.94964
Exoc1	2.39154	0.168083	0.0702821	1.12356		5.94964
Rbm10	2.39076	0.32324	0.135204	1.25114		5.94964
9130008F23Rik	2.3907	0.282066	0.117985	1.21593		5.94964
Ggt7	2.39023	0.351991	0.147262	1.27632		5.94964
Ctse	2.38959	0.378565	0.158422	1.30005		5.94964
Ghitm	2.38825	0.228896	0.0958426	1.17194		5.94964
Xrn2	2.38806	0.241186	0.100996	1.18196		5.94964
Ipo9	2.38755	0.343227	0.143757	1.26859		5.94964
Cables2	2.387	0.236191	0.0989489	1.17788		5.94964
Awat2	2.38527	0.162482	0.0681188	1.11921		5.94964
AK085881	2.38483	0.197808	0.0829439	1.14695		5.94964
Ndnf	2.38376	0.868204	0.364216	1.82539		5.94964
Mccc1	2.38253	0.317031	0.133065	1.24576		5.94964
Hist1h2ab	2.38209	0.542888	0.227904	1.45689		5.94964
Fndc4	2.38201	0.357378	0.150032	1.2811		5.94964
BC065403	2.38136	0.228791	0.0960757	1.17185		5.94964
Krit1	2.38005	0.136146	0.0572033	1.09897		5.94964
Ces1a	2.37998	0.389737	0.163756	1.31015		5.94964
Ppm1f	2.37943	0.292394	0.122884	1.22467		5.94964
Slc17a5	2.37921	0.187138	0.0786552	1.1385		5.94964
Senp1	2.37866	0.34044	0.143122	1.26614		5.94964
Timm50	2.37815	0.216751	0.0911429	1.16211		5.94964
Nckap5l	2.37785	0.264359	0.111176	1.2011		5.94964
Cptp	2.37776	0.373749	0.157185	1.29572		5.94964
Afap1	2.37659	0.373794	0.157281	1.29576		5.94964
Osgin2	2.37418	0.313837	0.132188	1.24301		5.94964
Limk1	2.37354	0.265998	0.112068	1.20247		5.94964
Rhot1	2.3735	0.20495	0.0863495	1.15265		5.94964
Kansl2	2.37265	0.276302	0.116453	1.21109		5.94964
C230052I12Rik	2.37138	0.210521	0.088776	1.15711		5.94964
Nqo1	2.37018	0.29316	0.123687	1.22532		5.94964
Me1	2.37001	0.324624	0.136972	1.25234		5.94964
Supt5	2.36868	0.229769	0.0970027	1.17265		5.94964
P2rx6	2.36796	0.129647	0.0547506	1.09403		5.94964
Lrif1	2.36755	0.211513	0.089338	1.1579		5.94964
Tiam1	2.36737	0.23677	0.100014	1.17835		5.94964
AK046128	2.36731	0.249101	0.105225	1.18847		5.94964
Rif1	2.36727	0.246525	0.104139	1.18635		5.94964
Igf2r	2.36664	0.634395	0.268058	1.55229		5.94964
Ints8	2.36638	0.198928	0.0840644	1.14785		5.94964
Pank4	2.36616	0.206069	0.0870897	1.15354		5.94964
Helq	2.36521	0.264794	0.111954	1.20146		5.94964
Cdk20	2.36475	0.358055	0.151413	1.2817		5.94964
Prpf40a	2.36449	0.295203	0.124848	1.22706		5.94964
Ubr7	2.3643	0.194122	0.0821053	1.14403		5.94964
Zfp710	2.36311	0.262166	0.110941	1.19928		5.94964
Rspo2	2.36275	0.782818	0.331316	1.72049		5.94964
Fbxo42	2.36262	0.227485	0.096285	1.17079		5.94964
Gm4349	2.36064	0.190211	0.080576	1.14093		5.94964
Spire2	2.36022	0.259865	0.110102	1.19737		5.94964
Tspan3	2.35776	0.14825	0.0628774	1.10822		5.94964
Plagl1	2.35714	0.936025	0.397102	1.91325		5.94964
Mettl21b	2.35709	0.48481	0.205682	1.3994		5.94964
Tmem138	2.35682	0.240427	0.102013	1.18134		5.94964
Fhl2	2.35641	0.399885	0.169701	1.3194		5.94964
Aldh3a1	2.35471	0.182343	0.0774376	1.13473		5.94964
Adh1	2.35437	0.563504	0.239344	1.47785		5.94964
Rcc1	2.35421	0.368366	0.156472	1.29089		5.94964
Clca3a1	2.35389	0.522485	0.221966	1.43643		5.94964
Tmem194	2.35381	0.525752	0.223362	1.43968		5.94964
9330159M07Rik	2.35253	0.339498	0.144312	1.26532		5.94964
Plin2	2.35187	0.199988	0.0850338	1.14869		5.94964
Mfap3	2.35144	0.265663	0.112979	1.20219		5.94964
Repin1	2.35117	0.241149	0.102565	1.18193		5.94964
Lin7a	2.35063	0.377964	0.160793	1.29951		5.94964
Lancl2	2.35024	0.464816	0.197774	1.38014		5.94964
Evi5l	2.349	0.519585	0.221194	1.43354		5.94964
Emc2	2.34735	0.295709	0.125976	1.22749		5.94964
Styk1	2.34705	0.345389	0.147159	1.27049		5.94964
Cyb5r1	2.34657	0.354074	0.15089	1.27816		5.94964
1190005I06Rik	2.34596	0.569932	0.242942	1.48445		5.94964
Slc5a3	2.34544	0.331769	0.141453	1.25856		5.94964
Cbfa2t2	2.345	0.336626	0.143551	1.2628		5.94964
Manba	2.34367	0.406066	0.173261	1.32507		5.94964
Wwox	2.34238	0.195211	0.083339	1.14489		5.94964
Eif4e	2.34233	0.283863	0.121188	1.21745		5.94964
Mgme1	2.3415	0.288973	0.123414	1.22177		5.94964
Ston2	2.34119	0.305166	0.130346	1.23556		5.94964
Hk2	2.34064	0.474045	0.202528	1.389		5.94964
Herpud1	2.33999	0.316693	0.13534	1.24547		5.94964
Fntb	2.33965	0.155822	0.0666004	1.11406		5.94964
Tmem183a	2.33898	0.228811	0.097825	1.17187		5.94964
Tex10	2.33885	0.231415	0.0989438	1.17399		5.94964
Maml2	2.33687	0.410034	0.175463	1.32872		5.94964
Mab21l1	2.33467	0.221372	0.0948195	1.16584		5.94964
Steap3	2.33449	0.682942	0.292545	1.60541		5.94964
Api5	2.3344	0.142388	0.0609954	1.10373		5.94964
Kbtbd4	2.33391	0.194113	0.0831705	1.14402		5.94964
Cldn15	2.33304	0.355477	0.152367	1.27941		5.94964
8430419L09Rik	2.33226	0.199991	0.08575	1.14869		5.94964
Naga	2.33053	0.177153	0.0760141	1.13065		5.94964
Angpt4	2.33027	0.394938	0.169481	1.31489		5.94964
Lck	2.32973	0.390644	0.167678	1.31098		5.94964
Cep295	2.32963	0.209987	0.0901375	1.15668		5.94964
Dtx4	2.32924	0.969581	0.416265	1.95827		5.94964
Ints10	2.32922	0.301542	0.129461	1.23246		5.94964
Mmadhc	2.32872	0.158453	0.0680429	1.11609		5.94964
Dhrs4	2.32782	0.242332	0.104103	1.1829		5.94964
Zfx	2.32778	0.149541	0.0642421	1.10922		5.94964
Sccpdh	2.32761	0.211571	0.0908964	1.15795		5.94964
Sfxn5	2.32741	0.378732	0.162727	1.3002		5.94964
Setdb2	2.32622	0.316832	0.136201	1.24559		5.94964
Tmem63a	2.32476	0.224938	0.0967578	1.16873		5.94964
Gltp	2.32454	0.154226	0.0663468	1.11282		5.94964
Notch1	2.32393	0.269285	0.115875	1.20521		5.94964
AK040197	2.32372	1.10603	0.475976	2.15253		5.94964
Abcb7	2.32287	0.215121	0.09261	1.1608		5.94964
Nif3l1	2.32255	0.237288	0.102167	1.17877		5.94964
Gucd1	2.32087	0.12338	0.053161	1.08928		5.94964
Pomt2	2.31959	0.255746	0.110255	1.19395		5.94964
Hdac10	2.3191	0.197428	0.0851312	1.14665		5.94964
[truncated: 1,079 more rows]
