# Supplementary material for: Tsc2 disruption in mesenchymal progenitors results in tumors with vascular anomalies overexpressing Lgals3
Source: eLife. 2017 Jul 11;6:e23202. doi: 10.7554/eLife.23202 (PMC5505700; doi:10.7554/eLife.23202)
Supplement: Figure 4—source data 4. — Differentially expressed genes corrected by sirolimus. DOI: http://dx.doi.org/10.7554/eLife.23202.026 [file elife-23202-fig4-data4.xlsx]

## Sheet: Sheet1
Source data - Figure 4A. Differentially expressed genes corrected by sirolimus
genes reduced by sirolimus in KO and overexpressed in KO vs. WT		genes upregulated by sirolimus in KO and underexpressed in KO vs. WT
Aaas		AB341725
Aagab		Abtb1
Aak1		Acvr1b
Aar2		Adamts10
Aars		AK011205
AB343393		AK044348
Abat		AK079714
Abca4		AK085761
Abcb6		AK140221
Abcc4		AK145301
Abcg1		AK192647
Abhd12		AK196015
Abhd3		Ak8
Acad11		Amer1
Acad9		Ankrd50
Acap3		Ankzf1
Acer3		Arhgap39
Acin1		Arhgef25
Aco1		Arid3a
Acot13		Arid5b
Acox1		Arrdc2
Acsl1		Arxes1
Acsl5		Arxes2
Actl6a		Ascc1
Ada		Atg13
Adamts2		Atp5g2
Adamts3		Atp5sl
Adamts4		Atp8b2
Adck1		BC040690
Adcy9		Bckdha
Adcyap1r1		Bckdk
Add2		Bgn
Add3		Bmpr2
Adgrg2		Bmyc
Adm2		Btbd2
Adora2a		C1qtnf3
Adra1b		Cacnb3
Aebp1		Cadm3
Agpat5		Calcoco1
Agtpbp1		Ccdc162
Ahcyl1		Ccdc62
Ahcyl2		Ccdc71l
Ahi1		Ccng2
Aifm1		Ccni
Aim2		Ccnj
AK008384		Ccnt2
AK019690		Ccpg1
AK019743		Cdk5rap3
AK038969		Cfap126
AK039878		Chchd5
AK039882		Chd6
AK039960		Chmp1b
AK044622		Chst15
AK077405		Cish
AK085881		Clip3
AK089957		Cnnm4
AK134203		Cnppd1
AK135004		Cntfr
AK140218		Col27a1
AK141540		Cox7a2l
AK141794		Crbn
AK153656		Crebrf
AK154329		Crispld2
AK161748		Csdc2
AK194623		Csnk1e
Ak2		Cyba
AK204506		Dgkd
Ak4		Dirc2
Ak6		Dlg4
Akap17b		Dnajb13
Akap8		E130308A19Rik
Akr1b3		Eef1a1
Akr1c13		Eef1b2
Akt1s1		Eef2
Alas1		Eif3f
Aldh16a1		Eif3h
Aldh1l1		Eif3k
Aldh2		Eif4a2
Aldh3b1		Eif4b
Aldh4a1		Eif4e3
Aldoa		Emp1
Alg14		Emx2
Alkbh5		Endov
Amd2		Erap1
Ampd2		Ext1
Ampd3		Fam101b
Anapc7		Fam120b
Angpt4		Fam174a
Ankrd13a		Fam3c
Ankrd35		Fam84a
Ano3		Fam84b
Ano6		Farp1
Antxr2		Fau
Ap1s3		Faxc
Apex2		Fblim1
Apip		Fbxo36
Apmap		Fbxo38
Apoe		Fhl4
Aqp1		Filip1
Arcn1		Flot1
Arfgef2		Foxo1
Arhgap18		Frat1
Arhgdib		Fzd7
Arhgef2		Gabarapl1
Arih2		Gabbr1
Arl2bp		Ghr
Arl8b		Gid4
Armc1		Gigyf1
Armc9		Gltscr1l
Arntl		Gm11517
Arntl2		Gm16845
Arrdc4		Gm5148
Arsj		Gm9776
Asb5		Gm9958
Ascc2		Gnb2l1
Ascc3		Gpbp1l1
Asna1		Gpr157
Asph		Gramd1a
Asrgl1		Grcc10
Atf6b		Gypc
Atg3		Harbi1
Atg4d		Hic2
Atp1a1		Hsd3b7
Atp1b3		Hspb11
Atp5a1		Iah1
Atp5l		Ifi47
Atp5o		Igf1r
Atp5s		Igip
Atp6ap1		Iglon5
Atp6ap2		Ikzf2
Atp6v0a2		Il11
Atp6v0a4		Irf1
Atp6v0b		Itgb5
Atp6v0c		Jag1
Atp6v1a		Jrkl
Atp6v1b2		Jup
Atp6v1d		Kat8
Atp6v1h		Kcnab1
Atp8b5		Kif3c
Atrip		Kifc2
AY512912		Klf11
B3gat3		Klf13
B630005N14Rik		Klhl17
Bad		Klhl24
Bag3		Klhl38
Bahd1		Klhl9
Baiap2		Kxd1
Banf1		Lmbr1l
Bax		Lrrc61
Baz1a		Lrrk1
BC003348		Ltbp1
BC026208		Ltbp2
BC027545		Map3k14
Bccip		Mapk1ip1
Bcl2l13		Mbtps1
Bcl6		Mex3a
Bcl7b		Mn1
Bdh2		Mnt
Bfsp2		Mtmr14
Bloc1s2		Mtus1
Blvra		Mvb12b
Bnip3		Nbeal1
Brix1		Ndn
Brms1		Ndufs2
Brwd3		Nedd4
Bscl2		Nhs
Bsg		Nr1d2
Btbd10		Nrbp2
Btbd11		Nuak1
Bud31		Numa1
C130074G19Rik		Oxa1l
C230052I12Rik		P4ha3
C920025E04Rik		Pabpc4
Cab39l		Paip2
Cacybp		Parva
Camkk1		Pcdh18
Canx		Pcsk5
Cap2		Pdzrn3
Capn7		Peak1
Car13		Peg13
Car5b		Per3
Cars2		Pigg
Cav3		Pigv
Cbr3		Pim1
Ccbl2		Pim3
Ccdc101		Plekhg2
Ccdc115		Plekhm3
Ccdc125		Plscr3
Ccdc22		Pnpla2
Ccdc25		Poglut1
Ccdc3		Prickle3
Ccdc47		Prkacb
Ccdc93		Prl3a1
Ccdc94		Ptpn9
Ccdc96		Pttg1ip
Ccl8		Pycr1
Ccl9		R74862
Ccnd1		Rab11fip2
Ccnd2		Rab12
Ccne1		Rab2b
Cct8		Rad51d
Cd200r2		Rara
Cd55		Rbms1
Cd63		Rhoj
Cd80		Rnf214
Cdc14a		Rnf38
Cdc27		Rora
Cdc42se1		Rpl10
Cdc6		Rpl10a
Cdca7		Rpl11
Cdh17		Rpl13
Cdk4		Rpl14
Cdkl2		Rpl15
Cds1		Rpl17
Cdsn		Rpl18
Cdv3		Rpl18a
Cenpt		Rpl19
Cenpw		Rpl22
Cep164		Rpl23
Cerk		Rpl23a
Ces2g		Rpl24
Cfap36		Rpl26
Chac2		Rpl27
Chaf1b		Rpl27a
Chchd10		Rpl28
Chchd3		Rpl29
Chdh		Rpl3
Chfr		Rpl31
Chmp4b		Rpl32
Chordc1		Rpl36
Cipc		Rpl36a
Cklf		Rpl37
Clcn5		Rpl37a
Clcn7		Rpl4
Clec14a		Rpl41
Clec16a		Rpl5
Clk3		Rpl6
Cln5		Rpl7
Cln8		Rpl7a
Clpb		Rpl8
Clptm1		Rpl9
Clybl		Rplp1
Cmc2		Rps10
Cml1		Rps11
Cml3		Rps12
Cmpk1		Rps14
Cmtm4		Rps15
Cmtm8		Rps16
Cndp2		Rps17
Cnnm1		Rps18
Cnpy3		Rps23
Cobll1		Rps25
Col18a1		Rps26
Col6a3		Rps28
Commd8		Rps29
Copb1		Rps3
Copb2		Rps4x
Copg1		Rps5
Coprs		Rps6
Cops4		Rps8
Cops6		Rpsa
Copz1		Rras
Coq7		Runx1
Coro1a		Rxrb
Cox10		Sema4c
Cox7a1		Sema7a
Cpeb4		Sfxn3
Cpne2		Skil
Cpped1		Slc9a3r2
Cptp		Snx29
Creg1		Socs2
Creld2		Sppl3
Cry1		Spsb1
Cstb		St6galnac6
Cstf2		St7l
Cth		Stat6
Ctnnb1		Ston1
Ctsk		Sun2
Cubn		Tbc1d15
Cul2		Tceal3
Cul5		Tead3
Cuta		Tef
Cyb561d2		Tep1
Cyb5b		Tfap4
Cycs		Tgfb1
Cyfip2		Tgfbr1
D030045P18Rik		Tgif1
D17H6S53E		Tmco6
D17Wsu92e		Tmem136
D1Ertd622e		Tmem204
D5Ertd605e		Tmem220
Daxx		Tmem44
Dbnl		Tmem50a
Dcaf10		Tmem59
Dcaf13		Tmub1
Dcun1d5		Tnfsf18
Ddit4		Tnnc1
Ddit4l		Triqk
Ddt		Trmt1
Ddx1		Tspan4
Ddx18		Ttc33
Ddx20		Ubald1
Ddx24		Ubald2
Ddx39		Ube2r2
Ddx41		Unc50
Ddx42		Ust
Ddx56		Vcam1
Defb1		Vmn1r53
Dennd2c		Vsig10l
Depdc7		Wbscr17
Derl1		Wdr45
Dhx16		Wdtc1
Dhx33		Wisp1
Dhx38		Wnt9a
Diap1		Wwc2
Dip2b		Xpc
Dis3		Yipf2
Disp2		Zbtb10
Dld		Zbtb44
Dmxl2		Zc3h6
Dnajb11		Zdhhc1
Dnajc1		Zdhhc17
Dnajc13		Zeb1
Dnajc15		Zfp105
Dnajc2		Zfp14
Dnajc3		Zfp30
Dolpp1		Zfp579
Donson		Zfp658
Dot1l		Zfp661
Dpp7		Zfp775
Dpy19l3		Zfp799
Drd1		Zkscan14
Drg2		Zkscan7
Dtnbp1		Zscan2
Duoxa1		Zswim4
Dusp22		0610011F06Rik
Dusp9		1110038B12Rik
Dzip1		1500012F01Rik
E030003E18Rik		1600020E01Rik
E130012A19Rik		2010001A14Rik
E130309D02Rik		2610008E11Rik
E230013L22Rik		2610203C20Rik
E2f1		2810408A11Rik
E430025E21Rik		2900097C17Rik
Eed		4931406P16Rik
Efcab1		5730409E04Rik
Efemp2		6330419J24Rik
Eftud2		9130221H12Rik
Ehd4		9930014A18Rik
Eif2b4
Eif2b5
Eif3j1
Eif4a3
Eif4e
Ell2
Elof1
Elovl4
Emb
Emc1
Emc3
Emg1
Emilin2
Emp3
Enah
Enpp2
Enpp5
Entpd4
Epb4.1l3
Epg5
Ephb6
Ephx1
Eps15
Ercc2
Ergic2
Erh
Erlin1
Ermp1
Ero1l
Erp44
Espn
Esr1
Etfa
Etfdh
Evi5l
Evi5l
Exoc1
Exoc2
Exoc4
Exoc5
Exosc2
Exosc3
Exosc6
F11r
Fabp3
Fabp7
Fads6
Fam105a
Fam117a
Fam120a
Fam129a
Fam136a
Fam149a
Fam162a
Fam183b
Fam21
Fam214a
Fam50a
Fam53b
Fam72a
Fam81a
Fam98a
Fancb
Fancm
Fastkd3
Fastkd5
Fbxl19
Fbxo16
Fbxo28
Fbxo34
Fcf1
Fdx1
Fdxr
Fen1
Fgd4
Fgfr3
Fh1
Fig4
Fkbp11
Fmr1
Fnip2
Fosl1
Foxd1
Frmd3
Frmd4b
Frmd8
Frrs1
Fth1
Fuca1
Fuca2
Fyttd1
Gadd45a
Gal3st3
Galk1
Galm
Galnt12
Galr2
Ganab
Gatsl2
Gba
Gbe1
Gclc
Gcnt1
Gdap1l1
Gdap2
Gde1
Gdf15
Gem
Gfod1
Gfpt1
Ghitm
Gla
Gli1
Glmp
Glrx2
Gm11351
Gm13154
Gm14295
Gm3776
Gm4980
Gm5523
Gm8817
Gmfb
Gmps
Gngt2
Gnl1
Gnpda1
Gosr2
Gpkow
Gpld1
Gpnmb
Gprc5c
Gramd1b
Grb14
Grhpr
Gripap1
Grn
Grpel2
Gspt1
Gss
Gstt3
Gtf2e2
Gtf2f1
Gtf2h1
Gtf2h3
Gtf3c6
GU332589
Gusb
Gxylt1
H2afy
H2-DMb1
H2-Q7
Hars
Haus3
Haus6
Haus7
Hba-a2
Hcfc2
Hcls1
Hddc2
Hdhd3
Heatr3
Hecw2
Hells
Hexa
Hey1
Hhipl1
Hif1a
Hif1an
Higd1a
Hist1h1t
Hist1h2ao
Hist1h2bj
Hist1h2bp
Hist1h4b
Hmgcl
Hmgcll1
Hmgn3
Hmox1
Hnrnpab
Hnrnph2
Hnrnpll
Hnrnpm
Hpgd
Hpse
Hsd11b1
Hsd17b12
Hsd17b7
Hsf2
Hsp90aa1
Hspa4
Hspa5
Htatip2
Htra1
Huwe1
I54
Iba57
Id1
Id3
Ifi202b
Ifi27
Igf2r
Igfbp6
Ikbkap
Immt
Impa1
Ino80c
Ints8
Irak4
Isoc2a
Itgad
Itgb1bp1
Itpk1
Itsn2
Jade3
Jak1
Jmjd6
Jtb
Kank1
Katnal2
Kbtbd11
Kcmf1
Kctd9
Kidins220
Kif21a
Kif21b
Kif3b
Klf10
Klhl15
Kpna2
Kpna6
Kpnb1
Krt19
L3mbtl2
Lacc1
Lamtor1
Lap3
Laptm4b
Layn
Ldha
Ldhb
Leng1
Leo1
Lgals3
Lgals3bp
Lgals8
Lgmn
Lgr4
Lhpp
Lifr
Liph
Lman2
Lonp1
Lrp2bp
Lrpprc
Lrrc59
Lrrc8e
Lsm4
Lta4h
Ltv1
Ly6a
Ly6c1
Lypd6
Lzic
Mad1l1
Mad2l1bp
Magi3
Magt1
Mak16
Malrd1
Man2b1
Maoa
Map2k6
Map3k7
Map4k4
Mapk1
Matn3
Mbd3
Mcm2
Mcm6
Me2
Med10
Med17
Metrnl
Mfn1
Mfsd1
Mfsd11
Mgarp
Mgmt
Mif
Minos1
Mknk2
Mlec
Mlkl
Mlx
Mmp13
Mmp15
Mnda
Mns1
Mon1b
Mpc2
Mpp2
Mr1
Mre11a
Mrgprf
Mro
Mroh1
Mrpl15
Mrpl16
Mrpl22
Mrpl27
Mrpl3
Mrpl37
Mrpl39
Mrpl50
Mrpl51
Mrpl54
Mrps10
Mrps11
Mrps14
Mrps15
Mrps16
Mrps22
Mrps6
Mrps7
Mrs2
Ms4a4d
Mta2
Mtch2
Mtfr1l
Mtm1
Mtr
Musk
Mvb12a
Mxd4
Mydgf
Myef2
Myo10
Myo16
Myo19
Myo5a
Myo5c
Myo6
Myof
Myzap
N6amt2
Naa40
Naa50
Naaa
Nampt
Nans
Nars
Ncbp1
Nceh1
Nde1
Ndufa13
Ndufa4l2
Ndufaf2
Ndufb11
Ndufb2
Ndufb8
Ndufb9
Ndufs4
Ndufs8
Necab3
Nedd4l
Neu1
Nfkbib
Nfyc
Ngdn
Ngfrap1
Nhlrc1
Nhlrc3
Nid2
Nlrc5
Nmnat3
Nmt2
Nop9
Nos3
Npas1
Npc1
Npepps
Nqo1
Nqo2
Nr1h4
Nr2c2ap
Nrd1
Nrn1
Nsf
Nsun4
Nt5dc3
Nubp1
Nucb2
Nudc
Nudcd2
Nudt15
Nudt22
Nudt5
Nup205
Nup35
Nup50
Nup93
Nup98
Nxt1
Odf2l
Ogdh
Opa3
Optn
Orai2
Orc1
Orc2
Os9
Osbpl9
Osgepl1
Ostc
Ostf1
Oxr1
P2rx6
P4ha1
P4ha2
P4hb
Pafah2
Pak4
Parp1
Pctp
Pcx
Pcyox1
Pcyt1a
Pdcd6ip
Pde1c
Pdhx
Pdk1
Pdk3
Pdxp
Pdzd11
Pebp1
Peg10
Pfas
Pfkfb3
Pfkl
Pfkp
Pgam1
Pgbd5
Pgk1
Pgm1
Pgp
Phf5a
Phka1
Phospho1
Phospho2
Phtf2
Pi4k2b
Pi4ka
Pi4kb
Piga
Pik3r3
Pip4k2c
Pla2g2e
Plbd2
Plek2
Plekha2
Plekhb1
Plod1
Pltp
Plxna2
Pmm2
Pmpcb
Pnn
Pno1
Pnpo
Pnpt1
Polr2b
Polr2d
Polr3a
Pom121
Pon3
Pop5
Pou2f3
Ppard
Pparg
Ppcs
Ppef1
Ppif
Ppl
Ppm1f
Ppm1g
Ppm1h
Ppp1r14b
Ppp1r37
Ppp2r1b
Ppp6c
Pqlc2
Pradc1
Prelid2
Prg4
Prim2
Prosc
Prpf31
Prpf38a
Prpf4
Prpf40a
Prpf6
Prps2
Prr14l
Prr32
Prrg4
Prune2
Psmb6
Psmc3
Psmc5
Psmd13
Psmd14
Psmd2
Psmd7
Psmd9
Psme3
Psme4
Psmg3
Psph
Ptcra
Ptdss1
Ptger2
Ptgr1
Ptgr2
Ptgs1
Ptpn11
Pus7l
Pvr
Pwp1
Pycrl
Pygl
Pyurf
Qdpr
Rab11fip1
Rab19
Rab20
Rab22a
Rab32
Rab3gap2
Rab40b
Ralb
Ran
Ranbp10
Rangap1
Rapsn
Rassf2
Rassf5
Rbm19
Rbm25
Rbm28
Rbm38
Rbx1
Rcan1
Rcan2
Rcc1
Rdh12
Rdh13
Renbp
Retsat
Rfx5
Rfx7
Rgs2
Rhod
Riok1
Ripk1
Ripk3
Rnase1
Rnaseh2b
Rnd1
Rnf121
Rnf181
Rnf40
Rnf6
Rpa1
Rpf2
Rpl7l1
Rpn1
Rpn2
Rpp25l
Rps19bp1
Rps27l
Rqcd1
Rragc
Rragd
Rrbp1
Rrm2
Rrn3
Rrs1
Rtfdc1
Rwdd2b
Sacm1l
Samd8
Sap30
Sars
Sart1
Sart3
Sbno1
Scarb1
Scg2
Scpep1
Scrn1
Scube3
Sdf2l1
Sdsl
Sec11c
Sec23b
Sec23ip
Sec24a
Sec61a1
Sec61b
Sec61g
Sema4b
Senp2
Sephs2
Sept3
Serp1
Serpinb1a
Sesn2
Sesn3
Setdb2
Sf3a1
Sgip1
Sgta
Sh3bgrl2
Sh3bp1
Sh3pxd2b
Shc2
Shq1
Slc14a2
Slc16a3
Slc25a1
Slc25a10
Slc25a13
Slc25a14
Slc25a32
Slc25a33
Slc25a44
Slc26a2
Slc29a3
Slc2a6
Slc31a1
Slc35b1
Slc35f2
Slc35g1
Slc35g2
Slc37a2
Slc38a6
Slc39a6
Slc43a2
Slc5a3
Slc7a4
Slc8b1
Slc9a3r1
Slco2a1
Slco2b1
Slfn3
Slirp
Slmo2
Slx4ip
Smap2
Smim4
Smpdl3b
Snai1
Snai2
Snf8
Snhg4
Snip1
Snrnp25
Snrnp70
Snta1
Sntb2
Snx10
Snx15
Snx19
Snx2
Snx3
Snx8
Sord
Sox6
Spata6
Spcs3
Spg21
Spin2c
Spr
Sprtn
Spry3
Spryd4
Sptlc2
Sqstm1
Srd5a3
Srp72
Srp9
Srpk1
Srpx2
Srsf1
Srsf2
Srsf7
Srxn1
Ssfa2
Ssr1
Ssr2
Sstr1
Sstr2
St13
St3gal5
St8sia2
Stac2
Stam2
Stard4
Stard7
Stc1
Steap1
Stip1
Stk17b
Stom
Ston2
Strn3
Stt3a
Stt3b
Stx8
Stxbp2
Stxbp4
Stxbp6
Suclg1
Suclg2
Suds3
Supt5
Surf4
Swi5
Sympk
Syngr1
Synj1
Synj2bp
Szrd1
Tacc1
Tada2b
Taf2
Taldo1
Taok3
Tbc1d8b
Tbcb
Tbcd
Tcirg1
Tcof1
Tdg
Tex15
Tex19.1
Tex30
Tfe3
Tfg
Tfpt
Tgfbrap1
Thoc3
Thrb
Thyn1
Tifa
Tigd3
Timm23
Timm50
Timm8a1
Timm8b
Tlr1
Tm2d2
Tmbim4
Tmed8
Tmed9
Tmem101
Tmem120a
Tmem127
Tmem131
Tmem135
Tmem14c
Tmem158
Tmem18
Tmem183a
Tmem19
Tmem192
Tmem208
Tmem251
Tmem256
Tmem263
Tmem43
Tmem45a
Tmem70
Tmem8
Tmem97
Tmem9b
Tmx1
Tmx2
Tnfrsf10b
Tnfrsf22
Tnfrsf26
Tnfsf9
Tnn
Tnpo3
Tob1
Tollip
Tpi1
Tpp1
Tprn
Tram1l1
Trim2
Trim47
Trim63
Trmt6
Trp53rk
Trpm3
Tsc1
Tsn
Tspyl2
Tsr1
Tssc4
Tstd2
Ttc1
Ttc14
Ttll9
Tubb4b
Tubg1
Tubgcp4
Txndc15
U2af1
Uap1l1
Ubap1
Ube2m
Ube2n
Ube2q1
Ube2s
Ubxn4
Ufc1
Ufd1l
Ufsp2
Ugdh
Uggt1
Ugp2
Ugt1a6a
Ugt1a7c
Ulbp1
Unc119b
Ung
Uso1
Usp31
Usp38
Usp39
Usp5
Utp15
Utp18
Uvrag
Uxs1
Uxt
Vac14
Vamp8
Vcp
Vcpkmt
Vdac1
Vimp
Vipr1
Vldlr
Vnn1
Vps18
Vps29
Vps35
Vps36
Vps45
Wapal
Wasf1
Wbscr22
Wdhd1
Wdr4
Wdr6
Wdr70
Wfdc5
Wnk3
Wnt5b
Wrap53
Xdh
Xpnpep1
Xpr1
Xrcc6bp1
Xylb
Ybx1
Yipf5
Ykt6
Yrdc
Ythdf2
Zbtb7b
Zc3h18
Zcchc4
Zdhhc20
Zdhhc3
Zfp106
Zfp365
Zfp511
Zhx3
Zmym1
Znhit3
Znhit6
1110001J03Rik
1110057K04Rik
1700003F12Rik
1700007K13Rik
1700052N19Rik
1700084C01Rik
1810026J23Rik
2210016F16Rik
2310022A10Rik
2310036O22Rik
2310069G16Rik
2410016O06Rik
2410131K14Rik
2810025M15Rik
2810408I11Rik
2900055J20Rik
3110002H16Rik
3300005D01Rik
4930430F08Rik
4930461G14Rik
4930506M07Rik
4930579G24Rik
4931428F04Rik
5031439G07Rik
5730508B09Rik
6430548M08Rik
6430584L05Rik
9530077C05Rik
A230057D06Rik
A930017M01Rik
