# Supplementary material for: Tsc2 disruption in mesenchymal progenitors results in tumors with vascular anomalies overexpressing Lgals3
Source: eLife. 2017 Jul 11;6:e23202. doi: 10.7554/eLife.23202 (PMC5505700; doi:10.7554/eLife.23202)
Supplement: Figure 4—source data 5. — Non-silent mutations in TSC1 or TSC2 found in bladder tumors (The Cancer Genome Atlas). DOI: http://dx.doi.org/10.7554/eLife.23202.027 [file elife-23202-fig4-data5.xlsx]

## Sheet: Sheet1
Column1	Column2	Column3	Column4	Column5	Column6	Column7
Mutation type	Missense	Nonsense	Frame Shift Deletion	Splice Site	In Frame Deletion	5'UTR
TSC1	9	13*	5^	5	1	0
TSC2	8	2	1	0	0	1
* One sample also contained missense mutation in TSC2
^ One sample also contained 5' UTR mutation in TSC2
Figure 4-source data 5. Non-silent mutations in TSC1 or TSC2 found in bladder tumors (The Cancer Genome Atlas).
