# Supplementary material for: Tsc2 disruption in mesenchymal progenitors results in tumors with vascular anomalies overexpressing Lgals3
Source: eLife. 2017 Jul 11;6:e23202. doi: 10.7554/eLife.23202 (PMC5505700; doi:10.7554/eLife.23202)
Supplement: Figure 5—source data 1. — Gal-3 levels (pg/mL) in Tsc2 WT or KO limb dermal fibroblasts ± 48 hr treatment with sirolimus. DOI: http://dx.doi.org/10.7554/eLife.23202.029 [file elife-23202-fig5-data1.xlsx]

## Sheet: Sheet1
Measurement count: 1 Filter: 450
	1	2	3	4	5	6	7	8
A	3.329	3.292	0.443	0.449	0.483	0.476	0.54	0.537
B	2.35	2.288	0.393	0.392	0.394	0.404	0.298	0.301
C	1.477	1.45	1.686	1.723	1.65	1.652	1.671	1.65
D	0.882	0.875	1.068	1.105	1.125	1.148	0.321	0.327
E	0.545	0.539	0.441	0.441	0.506	0.512	0.459	0.461
F	0.356	0.35	0.416	0.426	0.27	0.272	0.306	0.299
G	0.267	0.26	1.342	1.354	1.512	1.518	1.431	1.394
H	0.166	0.153	0.772	0.783	0.416	0.426	0.377	0.378
Measurement count: 1 Filter: 570
	1	2	3	4	5	6	7	8
A	0.048	0.053	0.047	0.046	0.049	0.047	0.047	0.047
B	0.05	0.045	0.047	0.043	0.042	0.046	0.042	0.043
C	0.044	0.044	0.048	0.046	0.047	0.046	0.045	0.046
D	0.042	0.061	0.044	0.044	0.043	0.045	0.042	0.043
E	0.042	0.042	0.044	0.043	0.042	0.044	0.042	0.044
F	0.041	0.047	0.043	0.043	0.042	0.043	0.042	0.044
G	0.041	0.042	0.046	0.044	0.046	0.045	0.044	0.048
H	0.043	0.042	0.043	0.044	0.048	0.05	0.045	0.044
						pg/ml		X dilution factor = 25	X dilution factor = 25	protein(ug/ul)	normalization multiplier	normalized
24hr	5N3WT -	U1	A3,A4	0.443,0.449	0.446	46.683	43.286 - 50.079	1167.08	1167.08	0.222	1	1167.08										24hr WT	24hr KO	48hr WT	48hr KO	24hr WT	24hr KO	48hr WT	48hr KO
24hr	5N3WT rapa	U2	B3,B4	0.393,0.392	0.393	37.547	34.424 - 40.669	938.675	938.675	0.196	0.882883	1063.19										0	0	0	0	20nM	20nM	20nM	20nM
24hr	5N6KO -	U3	C3,C4	1.686,1.723	1.705	310.326	269.811 - 350.8	7758.15	7758.15	0.284	1.27928	6064.47										1167.08	6064.47	1438.52	5121.59	1063.19	4608.69	478.404	1176.77
24hr	5N6KO rapa	U4	D3,D4	1.068,1.105	1.087	166.079	151.184 - 180.947	4151.98	4151.98	0.2	0.900901	4608.69										952.563	4052.46	1302.71	5436.27	1176.77	2739.96	603.59	672.017						t-test
24hr	5N5WT -	U5	E3,E4	0.441,0.441	0.441	45.826	42.456 - 49.196	1145.65	1145.65	0.267	1.2027	952.563										1426.7	6181.72	1335.4	4957.53	1393.05	4872.71	802.263	966.28			24hr wt vs KO untreated			0.0038036
24hr	5N5WT rapa	U6	F3,F4	0.416,0.426	0.421	42.406	39.139 - 45.672	1060.15	1060.15	0.2	0.900901	1176.77			24hr WT	24hr KO	48hr WT	48hr KO									24hr WT	24hr KO	48hr WT	48hr KO		48hr wt vs KO untreated			1.28791e-05
24hr	5N8KO -	U7	G3,G4	1.342,1.354	1.348	222.703	198.689 - 246.713	5567.57	5567.57	0.305	1.37387	4052.46	average	0	1207.92	6910.88	1410.81	6653.6							average	0	1182.11	5432.88	1358.88	5171.8		24hr wt vs KO sirolimus			0.0134645
24hr	5N8KO rapa	U8	H3,H4	0.772,0.783	0.778	105.649	98.43 - 112.867	2641.22	2641.22	0.214	0.963964	2739.96	average	20nM sirolimus	988.392	3734.99	507.558	860.942							average	20nM sirolimus	1211	4073.79	628.086	938.354		48hr wt vs KO sirolimus			0.149342
24hr	5N10WT -	U9	A5,A6	0.483,0.476	0.48	52.441	48.854 - 56.027	1311.03	1311.03	0.204	0.918919	1426.7			24hr WT	24hr KO	48hr WT	48hr KO									24hr WT	24hr KO	48hr WT	48hr KO		24hr KO untreated vs sirolimus			0.231145
24hr	5N10WT rapa	U10	B5,B6	0.394,0.404	0.399	38.654	35.498 - 41.809	966.35	966.35	0.154	0.693694	1393.05	stdev	0	89.9347	1176.52	171.513	769.378							stdev	0	237.428	1196.92	70.8854	243.288		48hr KO untreated vs sirolimus			3.11613e-05
24hr	5N12KO -	U11	C5,C6	1.65,1.652	1.651	296.277	258.578 - 333.976	7406.92	7406.92	0.266	1.1982	6181.72	stdev	20nM sirolimus	63.6665	956.095	74.0459	206.528							stdev	20nM sirolimus	167.572	1162.64	163.313	253.531
24hr	5N12KO rapa	U12	D5,D6	1.125,1.148	1.137	176.471	160.022 - 192.909	4411.77	4411.77	0.201	0.905405	4872.71
48hr	5N3WT -	U13	E5,E6	0.506,0.512	0.509	57.541	53.762 - 61.319	1438.52	1438.52	0.222	1	1438.52
48hr	5N3WT rapa	U14	F5,F6	0.27,0.272	0.271	16.895	14.622 - 19.169	422.375	422.375	0.196	0.882883	478.404
48hr	5N6KO -	U15	G5,G6	1.512,1.518	1.515	262.078	230.957 - 293.197	6551.95	6551.95	0.284	1.27928	5121.59
48hr	5N6KO rapa	U16	H5,H6	0.416,0.426	0.421	42.406	39.139 - 45.672	1060.15	1060.15	0.2	0.900901	1176.77
48hr	5N5WT -	U17	A7,A8	0.54,0.537	0.539	62.671	58.67 - 66.671	1566.78	1566.78	0.267	1.2027	1302.71
48hr	5N5WT rapa	U18	B7,B8	0.298,0.301	0.3	21.751	19.207 - 24.295	543.775	543.775	0.2	0.900901	603.59
48hr	5N8KO -	U19	C7,C8	1.671,1.65	1.661	298.75	260.557 - 336.93	7468.75	7468.75	0.305	1.37387	5436.27
48hr	5N8KO rapa	U20	D7,D8	0.321,0.327	0.324	25.912	23.184 - 28.641	647.8	647.8	0.214	0.963964	672.017
48hr	5N10WT -	U21	E7,E8	0.459,0.461	0.46	49.085	45.612 - 52.558	1227.12	1227.12	0.204	0.918919	1335.4
48hr	5N10WT rapa	U22	F7,F8	0.306,0.299	0.303	22.261	19.693 - 24.829	556.525	556.525	0.154	0.693694	802.263
48hr	5N12KO -	U23	G7,G8	1.431,1.394	1.413	237.604	210.952 - 264.223	5940.1	5940.1	0.266	1.1982	4957.53
48hr	5N12KO rapa	U24	H7,H8	0.377,0.378	0.378	34.995	31.95 - 38.04	874.875	874.875	0.201	0.905405	966.28
	Standard	S1	A1,A2	3.329,3.292	3.311	1000	N/A
	Standard	S2	B1,B2	2.35,2.288	2.319	500	N/A
	Standard	S3	C1,C2	1.477,1.45	1.464	250	N/A
	Standard	S4	D1,D2	0.882,0.875	0.879	125	N/A
	Standard	S5	E1,E2	0.545,0.539	0.542	62.5	N/A
	Standard	S6	F1,F2	0.356,0.35	0.353	31.25	N/A																				control	KO
	Standard	S7	G1,G2	0.267,0.26	0.264	15.625	N/A																			untreated	1358.88	5171.8
																										20nM sirolimus	628.086	938.354
																										stdev	70.8854	243.288
																										stdev rapa	163.313	253.531
