# Supplementary material for: Tsc2 disruption in mesenchymal progenitors results in tumors with vascular anomalies overexpressing Lgals3
Source: eLife. 2017 Jul 11;6:e23202. doi: 10.7554/eLife.23202 (PMC5505700; doi:10.7554/eLife.23202)
Supplement: Figure 5—source data 2. — Gal-3 levels in serum of Tsc2cKO and control mice (5E) and Gal-3 serum levels in Tsc2cKO mice treated with sirolimus (5F). DOI: http://dx.doi.org/10.7554/eLife.23202.030 [file elife-23202-fig5-data2.xlsx]

## Sheet: Untreated
Filter 570
Average of duplicates
			1.4645		0.7565		0.9795		0.468
standards			0.6985		0.6675		0.7295		0.4145
250	1.979		1.9575		0.691		0.473		0.449
125	1.1885		1.004		0.554		0.512		0.369
62.5	0.6775		1.256		1.0945		0.4665		0.617
31.25	0.384		0.538		0.5895		1.023		0.6495
15.6	0.219		1.136		0.6185		0.639		0.3455
0	0.0415		0.687		0.5425		0.4615
cKO			pg/ml	control			pg/ml
1513	3.5	1.4645	69738.1	1495	0.5895	3	28071.4
1490	3	0.6985	33261.9	1499	0.6185	3	29452.4
1500	3	1.9575	93214.3	1503	0.5425	3	25833.3
1512	3	1.004	47809.5	1521	0.9795	3	46642.9
1526	3	1.256	59809.5	1522	0.7295	3	34738.1
1544	3	0.538	25619	1527	0.473	3	22523.8
1564	2.5	1.136	54095.2	1537	0.512	3	24381
1568	2.5	0.687	32714.3	1453	0.4665	3	22214.3
1574	2.5	0.7565	36023.8	515	1.023	3	48714.3
1381	2.5	0.6675	31785.7	1565	0.639	2.5	30428.6
1322	2	0.691	32904.8	1566	0.4615	2.5	21976.2
1068	1	0.554	26381	1575	0.468	2.5	22285.7
1079	1	1.0945	52119	871	0.4145	2.5	19738.1
1067	1	0.617	29381	837	0.449	2	21381
				1410	0.369	1.5	17571.4
				1149	0.6495	1	30928.6
				1151	0.3455	1	16452.4
		control	months	cKO	months
		28071.4	3	69738.1	3.5
		29452.4	3	33261.9	3
		25833.3	3	93214.3	3
		46642.9	3	47809.5	3
		34738.1	3	59809.5	3
		22523.8	3	25619	3
		24381	3	54095.2	2.5
		22214.3	3	32714.3	2.5
		48714.3	3	36023.8	2.5
		30428.6	2.5	31785.7	2.5
		21976.2	2.5	32904.8	2
		22285.7	2.5	26381	1
		19738.1	2.5	52119	1
		21381	2
		17571.4	1.5
		29381	1
		30928.6	1
		16452.4	1
Average (1.5 months and up)		27730.2		46997.8
S.D.		9258.13		20660.2
		0.00369846
AVE ng/mL		27.7302		46.9978
SD ng/mL		9.25813		20.6602

## Sheet: Sirolimus Exp
Filter: 570
average of duplicates
standards			sirolimus or vehicle
250	1.6375	0.7475	Rapa	0.431	Rapa	0.702
125	0.8845	0.8245	Veh	0.7305	Rapa	0.5605
62.5	0.465	0.365	Veh	0.8515	Veh	1.264
31.25	0.2495	0.588	Rapa	0.58	Rapa	0.6675
15.6	0.144	0.469	Veh	0.74	Veh	0.9395
0	0.042	0.4435	Rapa	0.981	Rapa	0.733
		0.478	Veh	0.938	Rapa	0.7985
	Gal-3 values (pg/mL)
	vehicle	sirolimus
	43611.9	25731.3
	50835.8	34626.9
	44179.1	58567.2
	56000	41910.4
		33462.7
	75462.7	39850.7
	56089.6	43761.2
		47671.6
Average	54363.2	40697.8
	54.3632	40.6978	ng/ml
stdev	11684.1	9947.86
	11.6841	9.94786
