# Supplementary material for: Tsc2 disruption in mesenchymal progenitors results in tumors with vascular anomalies overexpressing Lgals3
Source: eLife. 2017 Jul 11;6:e23202. doi: 10.7554/eLife.23202 (PMC5505700; doi:10.7554/eLife.23202)
Supplement: Figure 6—source data 1. — Gal-3 levels (log2) in culture supernatants from TSC patient-derived skin tumor cell lines. DOI: http://dx.doi.org/10.7554/eLife.23202.032 [file elife-23202-fig6-data1.xlsx]

## Sheet: Sheet1
		NL	AF	PF	FCP
	patient 1	1		2.00727
	patient 2	1.75938	2.20898
	patient 3	1.48257	2.10265		2.31073
	patient 4	2.08287	2.3646
	patient 5	2.39324	2.33615
	patient 6	2.07835	2.69019		2.45056
	patient 7	1.89133		2.07428
	patient 8	1.31016	2.067	1.67877
	patient 9	1.78688	1.77432		2.25792
	patient 10	1.90691		2.20746
	patient 11	2.20358		3.00208
	patient 12	0.589826			2.17286
	patient 13	1.72245			2.26394
	ttest		0.0202205	0.028166	0.0258503
	mean	1.70827	2.22056	2.19397	2.2912
	stdev	0.502971	0.286185	0.491892	0.102019
	stderr	0.139499	0.108168	0.219981	0.0456242
	geomean	51.0826	166.171	156.305	195.525
	lower bound	37.0488	129.535	94.187	176.026
	upper bound	70.4323	213.169	259.39	217.183
	positive	19.3497	46.9976	103.085	21.6583
	negative	14.0338	36.636	62.1177	19.4985
