# Supplementary material for: Tsc2 disruption in mesenchymal progenitors results in tumors with vascular anomalies overexpressing Lgals3
Source: eLife. 2017 Jul 11;6:e23202. doi: 10.7554/eLife.23202 (PMC5505700; doi:10.7554/eLife.23202)
Supplement: Figure 6—source data 2. — Gal-3 levels in serum from LAM patients not taking mTOR inhibitor. AML status and %FEV1 are indicated. Each row is from a different patient. DOI: http://dx.doi.org/10.7554/eLife.23202.033 [file elife-23202-fig6-data2.xlsx]

## Sheet: Proven LAM, no tx
Gal-3 (pg/mL)	AML status	% FEV-1	BMI
5046	Y	124	33.6
4898	N	34.6	29.5
2499	Y	107.8	32.6
1988	Y	79.9	23.2
4580	Y	75.1	27.2
5927	Y	85	23.5
5496	N	70	29.1
2653	N	76.7	33
6212	Y	79.9	30.4
4808	N	90	20.7
7173	Y	131	33.9
3651	undetermined	66.3	31.1
3634	undetermined	71.3	29
3482	N	81	31.1
5046	N	54.5	22.2
2915	N	93.4	23.2
5425	Y	44	25
2841	N	82	22.4
4215	Y	97.6	25.4
9774	Y	47.6	34.2
2952	Y	112.7	41.1
6290	Y	98.1
4778	N	77.3	28.6
5960	Y	106	23.6
4717	N	84	22.5
5681	Y	85.9	27.9
4611	N	111	28.6
7441	Y	85.7	26.3
3834	N	80.3	29.6
4348	Y	59.7	29.7
2767	Y	125.2	25.2
3796	N	87.6	18.7
3533	Y	79.6	18.7
3344	N	100.2	19
5309	undetermined	50.7	17.1
2400	Y	114.4	22.7
10093	undetermined	31.1	26.2
2435	N	83.5	20.9
3768	Y	79	29.1
7830	Y	97.6	41.2
2115	N	99.1	21.5
5345	Y	57.5	20.7
3186	Y	60	19.1
3533	N	96.2	21.7
4793	Y	84	29.9
8612	N	63.3
4763	N	79	22.4
4110	N	96.1	29.6
4641	N	86.2	27.4
4158	N	63.1	20.1
3766	Y	79	23.6
4753	Y	107.2	26.7
3841	Y	63.9	30.5
2680	N	73.1	24.5
4667	N	40.6
7084	Y	57.8	52.1
3691	N	107.8	32.1
3803	Y	79.7	29
2401	Y	84
3327	Y	109.5	26.2
3859	undetermined	67.8	35.7
2825	Y	103	26.4
7739	Y	84
2784	undetermined	78	21.3
3009	undetermined	113	23.4

## Sheet: normal volunteers
BMI (kg/m2)	Gal-3
24.4	8340.71
21.6	2800.55
25.6	4026.53
20.3	3719.14
21.4	3656.59
	4471.53
21	4759.26
28.7	5559.91
19.4	2904.2
31.4	2591.45
30.9	12345.7
40.7	4673.48
23.2	5693.94
19.5	8567.68
27.1	4730.67
26.1	1799.74
19	2373.42
43.1	12619.1
22.4	3433.2
26.9	6292.64
19	4673.48
	5207.84
	2373.42
	1839.06
	4176.65
	9391.56
	5316.85
	2337.67
	2730.85
27.7	2187.55
	4026.53
32.7	4559.1
	4929.04
	4266.01
	4383.96
	8839.33
	7595.47
	7429.26
	3336.69
41.8	4176.65
	4929.04
	6794.83
	3497.53
	3594.04
