# Supplementary material for: Tsc2 disruption in mesenchymal progenitors results in tumors with vascular anomalies overexpressing Lgals3
Source: eLife. 2017 Jul 11;6:e23202. doi: 10.7554/eLife.23202 (PMC5505700; doi:10.7554/eLife.23202)
Supplement: Figure 6—source data 3. — Each row is a different patient. DOI: http://dx.doi.org/10.7554/eLife.23202.034 [file elife-23202-fig6-data3.xlsx]

## Sheet: Sheet1
Gal-3 (pg/mL)	%FEV1
3751	43.3
4972	69
6356	58
5815	128.4
4233	79
4838	42.4
8481	91
6102	86.2
4687	109.9
4518	47.5
5295	44.8
9842	28.8
3900	30.3
4688	47.5
4774	66.6
4237	87
3465	30.2
2942	90
3221	44.4
4089	77
5918	81.2
5061	74.5
2380	37.6
2897	35.7
1107	79.2
4062	32.8
6193	32.2
7268	62.3
4580	94.7
3025	88
5229	52
5703	69.7
2841	57.1
7328	55.7
3274	33.9
2756	60.4
8601	86
2823	67.4
2841	91
3168	35.2
5295	48
2934	54.5
2659	31.3
4207	65.8
2763	41.55
5363	70.5
5659	48.7
6657	76.1
6502	42.5
6657	57.5
2401	78.2
3443	30.1
2335	78.4
4976	92.4
2928	91.8
2659	90.2
5495	48.9
6424	63.4
10145	33.9
3189	61.1
2488	37.1
2357	68.4
2379	89.3
5112	95.9
3710	115.8
4043	86.3
6455	92.1
8674	58.3
6045	52
1879	70
2969	81
13072	110
